# Supplementary material for: Apoptotic neurodegeneration in whitefly promotes the spread of TYLCV
Source: eLife. 2020 Jul 30;9:e56168. doi: 10.7554/eLife.56168 (PMC7392610; doi:10.7554/eLife.56168)
Supplement: Supplementary file 3. [file elife-56168-supp3.xls]

## Sheet: elife-56168-supp3-v1
gene_id	transcript_id(s)	NV-1_FPKM	NV-2_FPKM	NV-3_FPKM	NV-4_FPKM	V-1_FPKM	V-2_FPKM	V-3_FPKM	V-4_FPKM	Symbol	Description	Pathway	GO Component	GO Function	GO Process	Blast nr
Btabaci_GLEAN_10014266	BTA026858.1,novel_T016118	18414.4	16361.8	17140.8	20206.4	16722.2	31533.2	18040.8	22541.3	-	-	ko05146//Amoebiasis;ko05110//Vibrio cholerae infection	-	-	-	gi|780613894|ref|XP_011691195.1|/2.75924e-44/PREDICTED: uncharacterized protein DDB_G0271670-like isoform X1 [Wasmannia auropunctata]
Btabaci_GLEAN_10006305	BTA009432.1	10198.4	9320.32	9629.4	11230.8	11536	23871.7	11154.4	16157	-	-	ko05146//Amoebiasis;ko05110//Vibrio cholerae infection	-	-	-	gi|969453330|ref|XP_015035609.1|/2.93478e-22/uncharacterized protein Dpse_GA30755 [Drosophila pseudoobscura pseudoobscura]
Btabaci_GLEAN_10023417	BTA001998.1,novel_T001299,novel_T001300,novel_T001301,novel_T001302	6081.07	6425.34	4780.18	4640.43	4529.49	4057.32	3457	3696.91	-	-	-	-	-	-	gi|646713602|gb|KDR17893.1|/0/Melanotransferrin [Zootermopsis nevadensis]
Btabaci_GLEAN_10016443	BTA023203.2,novel_T014103,novel_T014104	5398.86	4705.38	5035	6106.28	5152.28	9190.26	5015.86	7324.13	-	-	ko01100//Metabolic pathways;ko00260//Glycine, serine and threonine metabolism	-	-	-	gi|193659536|ref|XP_001943395.1|/4.91452e-132/PREDICTED: glucose dehydrogenase [FAD, quinone]-like [Acyrthosiphon pisum]
Btabaci_GLEAN_10006866	BTA008430.1,novel_T005418	5246.36	4602.48	4725.4	4982.17	2572.89	2042.81	1649.06	1820.02	-	-	ko05146//Amoebiasis;ko05110//Vibrio cholerae infection	-	-	-	gi|906461617|gb|KNC24058.1|/9.9413e-11/hypothetical protein FF38_01454 [Lucilia cuprina]
Btabaci_GLEAN_10015834	BTA024291.1	5146.41	6245.23	3937.36	3993.68	4911.77	5034.91	4797.68	4984.07	-	-	ko05016//Huntington's disease;ko05166//HTLV-I infection;ko04022//cGMP-PKG signaling pathway;ko05012//Parkinson's disease;ko04020//Calcium signaling pathway;ko05164//Influenza A	GO:0005743//mitochondrial inner membrane;GO:0016021//integral component of membrane	GO:0005215//transporter activity	GO:0055085//transmembrane transport	gi|787071524|dbj|BAR13239.1|/0/adenine nucleotide translocase insect1 [Bemisia tabaci]
Btabaci_GLEAN_10013347	BTA028145.1	5056.45	4683.48	4143.35	4025.84	3252	2337.99	2380.92	2337.45	-	-	ko05110//Vibrio cholerae infection;ko04810//Regulation of actin cytoskeleton;ko05205//Proteoglycans in cancer;ko04015//Rap1 signaling pathway;ko05100//Bacterial invasion of epithelial cells;ko04919//Thyroid hormone signaling pathway;ko04510//Focal adhesion;ko04145//Phagosome;ko05131//Shigellosis;ko04611//Platelet activation;ko05130//Pathogenic Escherichia coli infection;ko04520//Adherens junction…	-	GO:0005524//ATP binding	-	gi|217330650|ref|NP_001136108.1|/0/actin related protein 1 [Acyrthosiphon pisum]
Btabaci_GLEAN_10013302	BTA028223.1,novel_T016892	4044.34	3893.8	4383.85	4286.8	3199.11	3339.81	2575.52	3414.78	-	-	ko01100//Metabolic pathways;ko00330//Arginine and proline metabolism	-	GO:0004054//arginine kinase activity;GO:0005524//ATP binding	GO:0016310//phosphorylation	gi|242025534|ref|XP_002433179.1|/0/Arginine kinase, putative [Pediculus humanus corporis]
Btabaci_GLEAN_10014265	BTA026857.1,novel_T016117	3682.83	3186.51	3526.81	3707.2	3657.15	6537.49	3215.28	5093.91	-	-	-	-	-	-	gi|808133073|ref|XP_012169080.1|/5.30436e-08/PREDICTED: golgin subfamily A member 4 isoform X2 [Bombus terrestris]
Btabaci_GLEAN_10006306	BTA009433.1	3083.2	3104.15	2765.7	3673.74	2670.96	6509.92	3028.55	4991.04	-	-	ko05146//Amoebiasis;ko05110//Vibrio cholerae infection	-	-	-	gi|969453330|ref|XP_015035609.1|/2.93478e-22/uncharacterized protein Dpse_GA30755 [Drosophila pseudoobscura pseudoobscura]
Btabaci_GLEAN_10014133	BTA027040.1,novel_T016269	2998.74	2992.54	2839.73	3645.4	3427.25	5706.4	3340.02	4477.3	-	-	ko01100//Metabolic pathways;ko00260//Glycine, serine and threonine metabolism	-	-	-	gi|641651593|ref|XP_008190192.1|/9.06762e-114/PREDICTED: uncharacterized protein LOC100159632 isoform X2 [Acyrthosiphon pisum]
Btabaci_GLEAN_10004383	BTA012956.1,novel_T008140	2962.88	2368.14	3844.91	3907	2530.09	4737.48	2440.57	3343.43	-	-	ko01100//Metabolic pathways;ko00520//Amino sugar and nucleotide sugar metabolism	-	-	-	gi|929382287|ref|XP_014101639.1|/1.99039e-53/PREDICTED: probable chitinase 3, partial [Bactrocera oleae]
Btabaci_GLEAN_10023137	BTA002984.1	2886.49	2573.09	2708.59	3085.45	2985.53	6453.69	2935.73	4240.49	-	-	ko05146//Amoebiasis;ko05110//Vibrio cholerae infection	-	-	-	gi|900916353|gb|KMZ05855.1|/4.25483e-15/LOW QUALITY PROTEIN: uncharacterized protein Dsimw501_GD28401 [Drosophila simulans]
Btabaci_GLEAN_10024076	BTA029174.1,novel_T017528	2719.65	3516.79	1896.39	1833.37	2163.66	1958.59	1853.83	1942.01	-	-	ko01100//Metabolic pathways;ko05016//Huntington's disease;ko05010//Alzheimer's disease;ko05012//Parkinson's disease;ko00190//Oxidative phosphorylation	-	-	-	gi|939251412|ref|XP_014245312.1|/4.36049e-71/PREDICTED: ATP synthase lipid-binding protein, mitochondrial [Cimex lectularius]
Btabaci_GLEAN_10024934	BTA023498.1,novel_T014191	2331.58	2315.92	2531.06	2408.46	2138.15	2212.79	2061.32	2377.47	-	-	ko01100//Metabolic pathways;ko01200//Carbon metabolism;ko01230//Biosynthesis of amino acids;ko00010//Glycolysis / Gluconeogenesis;ko04066//HIF-1 signaling pathway;ko00030//Pentose phosphate pathway;ko00051//Fructose and mannose metabolism	-	GO:0004332//fructose-bisphosphate aldolase activity	GO:0006096//glycolytic process	gi|646697674|gb|KDR09236.1|/0/Fructose-bisphosphate aldolase [Zootermopsis nevadensis]
Btabaci_GLEAN_10014132	BTA027039.1	2135.59	1577.26	1429.44	1865.29	1914.9	3932.65	1833.93	2732.45	-	-	ko01100//Metabolic pathways;ko00260//Glycine, serine and threonine metabolism	-	-	-	gi|1000748606|ref|XP_015597081.1|/5.46376e-24/PREDICTED: glucose dehydrogenase [FAD, quinone] [Cephus cinctus]
Btabaci_GLEAN_10001316	BTA020239.1,novel_T012329	2072.95	2505.19	1700.34	1685.58	1754.14	1552.88	1532.28	1608.83	-	-	ko01100//Metabolic pathways;ko05016//Huntington's disease;ko05010//Alzheimer's disease;ko05012//Parkinson's disease;ko00190//Oxidative phosphorylation	-	-	-	gi|333696806|gb|AEF79997.1|/1.84182e-103/ATP synthase beta subunit [Euscelidius variegatus]
Btabaci_GLEAN_10007743	BTA006829.2,novel_T004349,novel_T004350,novel_T004351,novel_T004352,novel_T004353,novel_T004354,novel_T004355	2014.83	2235.45	1546.2	1474.35	1624.4	1505.61	1290.48	1473.57	-	-	ko01100//Metabolic pathways;ko00230//Purine metabolism;ko00250//Alanine, aspartate and glutamate metabolism	-	-	-	gi|985384917|ref|XP_015378790.1|/0/PREDICTED: adenylosuccinate synthetase-like [Diuraphis noxia]
Btabaci_GLEAN_10006018	BTA009922.1,novel_T006281,novel_T006282	1969.5	1496.45	2344.08	2281.87	2046	3129.6	1825	2361.15	-	-	ko04810//Regulation of actin cytoskeleton;ko04666//Fc gamma R-mediated phagocytosis;ko05203//Viral carcinogenesis	-	-	-	gi|662182960|ref|XP_008470658.1|/1.37673e-161/PREDICTED: gelsolin-like [Diaphorina citri]
Btabaci_GLEAN_10008839	BTA005078.1,novel_T003375	1932.81	1700.53	1451.21	1968.04	1823.6	3456.54	1495.23	2370.07	-	-	-	-	-	-	-
Btabaci_GLEAN_10026072	BTA010369.1,novel_T006536	1743.3	890.74	1462.9	2211.44	2224.79	2820.75	2146.42	2942.68	-	-	ko05200//Pathways in cancer;ko04151//PI3K-Akt signaling pathway;ko04141//Protein processing in endoplasmic reticulum;ko04612//Antigen processing and presentation;ko04915//Estrogen signaling pathway;ko04914//Progesterone-mediated oocyte maturation;ko05215//Prostate cancer;ko04621//NOD-like receptor signaling pathway	-	-	-	gi|70997669|gb|AAZ17403.1|/0/90 kDa heat shock protein [Bemisia tabaci]
Btabaci_GLEAN_10017749	BTA020663.1,novel_T012577,novel_T012578,novel_T012579	1705.65	1523.61	1609.1	1723.08	1481.5	2002.15	1381.7	1623.8	-	-	ko03013//RNA transport	-	-	-	gi|646698984|gb|KDR09848.1|/3.10765e-88/putative nucleoporin Nup54 [Zootermopsis nevadensis]
Btabaci_GLEAN_10017280	BTA021638.1	1608.51	1332.07	1321.47	1604.27	1607.74	3447.17	1779.84	2511.73	-	-	ko03013//RNA transport;ko03015//mRNA surveillance pathway	-	-	-	gi|668459351|gb|KFB47148.1|/1.37276e-12/AGAP005951-PA-like protein [Anopheles sinensis]
Btabaci_GLEAN_10007650	BTA007014.1,novel_T004460	1528.92	1159.8	1282.79	1545.1	878.79	1336.64	770.88	1248.98	-	-	ko01100//Metabolic pathways;ko00260//Glycine, serine and threonine metabolism	-	-	-	gi|641651593|ref|XP_008190192.1|/8.17174e-115/PREDICTED: uncharacterized protein LOC100159632 isoform X2 [Acyrthosiphon pisum]
Btabaci_GLEAN_10003408	BTA014985.1,novel_T009418	1457.89	1562.29	1143.62	1136.46	1076.59	382.17	825.76	721.47	-	-	ko04919//Thyroid hormone signaling pathway;ko05010//Alzheimer's disease;ko04024//cAMP signaling pathway;ko05414//Dilated cardiomyopathy;ko04022//cGMP-PKG signaling pathway;ko05410//Hypertrophic cardiomyopathy (HCM);ko05412//Arrhythmogenic right ventricular cardiomyopathy (ARVC);ko04020//Calcium signaling pathway;ko04261//Adrenergic signaling in cardiomyocytes;ko04972//Pancreatic secretion;ko04260…	-	-	-	gi|1000758663|ref|XP_015602313.1|/0/PREDICTED: calcium-transporting ATPase sarcoplasmic/endoplasmic reticulum type isoform X1 [Cephus cinctus]
Btabaci_GLEAN_10017678	BTA020866.1,novel_T012725	1434.96	1196.09	1181.28	1427.08	1337.19	2292.82	1329.17	1821.7	-	-	ko01100//Metabolic pathways;ko00500//Starch and sucrose metabolism;ko00040//Pentose and glucuronate interconversions;ko04976//Bile secretion;ko00983//Drug metabolism - other enzymes;ko00860//Porphyrin and chlorophyll metabolism;ko00830//Retinol metabolism;ko05204//Chemical carcinogenesis;ko00980//Metabolism of xenobiotics by cytochrome P450;ko00053//Ascorbate and aldarate metabolism;ko00982//Drug…	-	-	-	gi|646718153|gb|KDR20744.1|/6.65971e-150/UDP-glucuronosyltransferase 2B1 [Zootermopsis nevadensis]
Btabaci_GLEAN_10022419	BTA005961.1,novel_T003858	1429.63	1072.94	1752.09	1625.84	1233.66	2154.3	1291.04	1643.25	-	-	-	-	-	-	gi|939271764|ref|XP_014256150.1|/2.26673e-43/PREDICTED: uncharacterized protein LOC106670383 [Cimex lectularius]
Btabaci_GLEAN_10007150	BTA007921.1	1412.46	1327.66	1209.61	1502.06	1351.83	2493.66	1284.83	1848.21	-	-	-	-	-	-	-
Btabaci_GLEAN_10013110	BTA028441.1,novel_T016937,novel_T016938	1399.54	1242.57	1297.33	1576.88	1014.11	1783.61	885.68	1319.75	-	-	ko04514//Cell adhesion molecules (CAMs);ko04910//Insulin signaling pathway;ko04520//Adherens junction;ko04931//Insulin resistance	-	-	-	-
Btabaci_GLEAN_10010458	BTA002410.2,novel_T001580	1310.35	1757.3	968.2	926.74	1463.79	1623.69	1515.69	1614.41	-	-	ko01100//Metabolic pathways;ko01200//Carbon metabolism;ko05010//Alzheimer's disease;ko01230//Biosynthesis of amino acids;ko00010//Glycolysis / Gluconeogenesis;ko04066//HIF-1 signaling pathway	-	-	-	gi|480310427|gb|AGJ76542.1|/0/glyceraldehyde 3-phosphate dehydrogenase [Bemisia tabaci]
Btabaci_GLEAN_10018086	BTA019850.1,novel_T011968,novel_T011969	1280.02	3545.89	831.51	755.15	4500.06	2413.27	5765.52	3133.18	-	-	ko05146//Amoebiasis;ko05110//Vibrio cholerae infection	-	-	-	gi|315307980|gb|ADU04393.1|/0/vitellogenin [Bemisia tabaci]
Btabaci_GLEAN_10020986	BTA011372.2,novel_T007167,novel_T007168	1278.25	1095.72	974.81	1295.47	1225.8	2359.94	982.8	1426.57	-	-	ko01100//Metabolic pathways;ko00500//Starch and sucrose metabolism;ko00052//Galactose metabolism	-	-	-	gi|646685191|gb|KDR03832.1|/3.86776e-151/Maltase 1, partial [Zootermopsis nevadensis]
CUFF82.254.1	BTA019838.1	1206.04	1033.59	1089.49	1253.77	1004.65	2160.07	980.35	1479.21	-	-	-	-	-	-	-
Btabaci_GLEAN_10022688	BTA004765.1,novel_T003252,novel_T003253,novel_T003254,novel_T003255	1201.26	1165.55	804.02	1204.77	1101.59	1891.63	912.5	1234.7	-	-	-	-	-	-	gi|307194560|gb|EFN76852.1|/5.18373e-34/hypothetical protein EAI_16499, partial [Harpegnathos saltator]
Btabaci_GLEAN_10006299	BTA009449.1,novel_T006011,novel_T006012	1195.08	766.61	1514.88	1599.54	884.55	1407.6	893.28	1198.91	-	-	ko01100//Metabolic pathways;ko00230//Purine metabolism;ko05169//Epstein-Barr virus infection;ko05016//Huntington's disease;ko00240//Pyrimidine metabolism;ko05168//Herpes simplex infection;ko03020//RNA polymerase	-	-	-	gi|817082313|ref|XP_012263710.1|/5.20366e-77/PREDICTED: uncharacterized protein LOC105690495 [Athalia rosae]
CUFF109.659.1	BTA026782.1,novel_T016085	1157.41	805.86	1565.88	1381.22	1260.39	2155.72	1177.75	1690.4	-	-	-	-	-	-	gi|694188284|gb|AIS71883.1|/0/odorant-binding protein 2 [Bemisia tabaci]
Btabaci_GLEAN_10026246	BTA007677.1,novel_T004932,novel_T004933,novel_T004934,novel_T004935,novel_T004936,novel_T004937,novel_T004938	1140.25	888.36	882.83	769.34	716.2	407.26	484.16	335.64	-	-	ko04919//Thyroid hormone signaling pathway;ko05414//Dilated cardiomyopathy;ko04022//cGMP-PKG signaling pathway;ko05410//Hypertrophic cardiomyopathy (HCM);ko04530//Tight junction;ko04261//Adrenergic signaling in cardiomyocytes;ko05416//Viral myocarditis;ko04260//Cardiac muscle contraction	GO:0016459//myosin complex	GO:0003774//motor activity;GO:0003779//actin binding;GO:0005524//ATP binding	-	gi|195344578|ref|XP_002038858.1|/0/GM17204 [Drosophila sechellia]
Btabaci_GLEAN_10022416	BTA005958.1,novel_T003849,novel_T003850,novel_T003851,novel_T003852,novel_T003853,novel_T003854	1097.97	1158.24	856.46	840.29	1013.35	754.6	824.44	788.83	-	-	ko04919//Thyroid hormone signaling pathway;ko05414//Dilated cardiomyopathy;ko04022//cGMP-PKG signaling pathway;ko05410//Hypertrophic cardiomyopathy (HCM);ko04530//Tight junction;ko04261//Adrenergic signaling in cardiomyocytes;ko05416//Viral myocarditis;ko04260//Cardiac muscle contraction	-	-	-	gi|746858819|ref|XP_011060182.1|/0/PREDICTED: LOW QUALITY PROTEIN: paramyosin, short form-like [Acromyrmex echinatior]
Btabaci_GLEAN_10022355	BTA006293.1	1097.75	1329.78	835.41	793.3	1017.35	1147.73	1019.76	1143.36	-	-	ko01100//Metabolic pathways;ko05016//Huntington's disease;ko05010//Alzheimer's disease;ko05012//Parkinson's disease;ko00190//Oxidative phosphorylation	-	-	-	gi|90820022|gb|ABD98767.1|/8.06027e-42/putative mitochondrial ATP synthase [Graphocephala atropunctata]
Btabaci_GLEAN_10024426	BTA027033.1,novel_T016256	1072.48	1435.33	931.68	851.19	900.49	883.55	752.44	908.58	-	-	ko01100//Metabolic pathways;ko05016//Huntington's disease;ko05010//Alzheimer's disease;ko05012//Parkinson's disease;ko00190//Oxidative phosphorylation	-	-	-	gi|751229673|ref|XP_011168311.1|/0/PREDICTED: ATP synthase subunit alpha, mitochondrial [Solenopsis invicta]
Btabaci_GLEAN_10012034	BTA030086.1,novel_T018072	1064.08	1338.11	690.61	707.13	887.47	1004.21	831.95	834.26	-	-	ko01100//Metabolic pathways;ko05016//Huntington's disease;ko05200//Pathways in cancer;ko05168//Herpes simplex infection;ko05010//Alzheimer's disease;ko05012//Parkinson's disease;ko05145//Toxoplasmosis;ko04932//Non-alcoholic fatty liver disease (NAFLD);ko05222//Small cell lung cancer;ko05152//Tuberculosis;ko05164//Influenza A;ko05014//Amyotrophic lateral sclerosis (ALS);ko05416//Viral myocarditis;…	-	-	-	gi|383851538|ref|XP_003701289.1|/2.09162e-63/PREDICTED: cytochrome c [Megachile rotundata]
Btabaci_GLEAN_10023521	BTA001603.1,novel_T000974,novel_T000975,novel_T000976,novel_T000977	1043.1	1295.55	817.28	746.42	1119.16	1332.23	1084.97	1181.06	-	-	ko04146//Peroxisome	-	-	-	gi|646720598|gb|KDR22259.1|/1.24267e-61/Peroxisomal membrane protein PEX13 [Zootermopsis nevadensis]
Btabaci_GLEAN_10019976	BTA014718.1	1030.81	708.07	1341.02	1190.22	992.86	1592.63	1084.96	1275.47	-	-	ko01100//Metabolic pathways;ko00500//Starch and sucrose metabolism;ko00052//Galactose metabolism	-	-	-	gi|328702369|ref|XP_001952163.2|/0/PREDICTED: maltase 2-like [Acyrthosiphon pisum]
Btabaci_GLEAN_10015675	BTA024566.1,novel_T014708,novel_T014709,novel_T014710,novel_T014711,novel_T014712,novel_T014713,novel_T014714,novel_T014715,novel_T014716,novel_T014717	1020.41	2170.8	788.59	707.28	3233.27	1941.61	4136.32	2150.42	-	-	ko05146//Amoebiasis;ko05110//Vibrio cholerae infection	-	-	-	gi|315307980|gb|ADU04393.1|/0/vitellogenin [Bemisia tabaci]
CUFF59.435.1	BTA014252.1	1018.21	1028.33	1000.49	1007.8	1292.27	1528.45	1225.77	1363.4	-	-	ko05169//Epstein-Barr virus infection;ko03013//RNA transport;ko05166//HTLV-I infection;ko03008//Ribosome biogenesis in eukaryotes	-	-	-	gi|939251740|ref|XP_014245484.1|/3.29556e-67/PREDICTED: circadian clock-controlled protein-like [Cimex lectularius]
Btabaci_GLEAN_10022175	BTA006934.1,novel_T004414,novel_T004415,novel_T004416	991.21	1058.79	809.62	775.26	762.76	674.76	561.99	617.64	-	-	-	-	-	-	gi|641652880|ref|XP_008178569.1|/5.21996e-72/PREDICTED: tropomyosin-1, isoforms 33/34-like [Acyrthosiphon pisum]
Btabaci_GLEAN_10012282	BTA029788.2,novel_T017994,novel_T017995	977.8	907.09	767.77	1094.77	934.48	1302.23	789.35	1007.28	-	-	ko01100//Metabolic pathways;ko00500//Starch and sucrose metabolism;ko00052//Galactose metabolism	-	-	-	gi|646685191|gb|KDR03832.1|/1.50121e-125/Maltase 1, partial [Zootermopsis nevadensis]
Btabaci_GLEAN_10025108	BTA022080.1	974.74	1047.56	823.21	826.25	996.57	1335.1	897.22	1129.51	-	-	ko01100//Metabolic pathways;ko05016//Huntington's disease;ko05010//Alzheimer's disease;ko05012//Parkinson's disease;ko00190//Oxidative phosphorylation;ko04932//Non-alcoholic fatty liver disease (NAFLD);ko04260//Cardiac muscle contraction	-	-	-	gi|662199549|ref|XP_008472941.1|/1.15412e-53/PREDICTED: cytochrome c oxidase subunit 5A, mitochondrial [Diaphorina citri]
Btabaci_GLEAN_10019707	BTA015764.1,novel_T009920	964.74	1080.61	647.14	622.63	825.86	1068.11	825.99	846.37	-	-	ko05016//Huntington's disease;ko05010//Alzheimer's disease;ko05012//Parkinson's disease;ko00190//Oxidative phosphorylation;ko04932//Non-alcoholic fatty liver disease (NAFLD);ko04260//Cardiac muscle contraction	-	-	-	gi|592746008|gb|AHL43076.1|/9.03491e-07/GE24854, partial [Drosophila santomea]
Btabaci_GLEAN_10004837	BTA012078.1,novel_T007596	931.94	805.01	666.67	1026.24	883.35	1717.42	762.33	1211.49	-	-	ko05146//Amoebiasis;ko05169//Epstein-Barr virus infection;ko04810//Regulation of actin cytoskeleton;ko05200//Pathways in cancer;ko05205//Proteoglycans in cancer;ko04015//Rap1 signaling pathway;ko05100//Bacterial invasion of epithelial cells;ko04151//PI3K-Akt signaling pathway;ko04919//Thyroid hormone signaling pathway;ko04510//Focal adhesion;ko04145//Phagosome;ko05131//Shigellosis;ko05206//MicroR…	-	-	-	gi|913326354|ref|XP_013194582.1|/3.19056e-31/PREDICTED: uncharacterized protein LOC106138090 [Amyelois transitella]
Btabaci_GLEAN_10010855	BTA001744.1,novel_T001103,novel_T001104	913.62	853.32	933	925.48	866.47	1324.95	811.18	975.72	-	-	ko01100//Metabolic pathways;ko05016//Huntington's disease;ko05010//Alzheimer's disease;ko05012//Parkinson's disease;ko00190//Oxidative phosphorylation;ko04932//Non-alcoholic fatty liver disease (NAFLD)	-	GO:0008137//NADH dehydrogenase (ubiquinone) activity;GO:0010181//FMN binding;GO:0051287//NAD binding;GO:0051539//4 iron, 4 sulfur cluster binding	GO:0055114//oxidation-reduction process	gi|283046718|ref|NP_001164305.1|/0/NADH dehydrogenase [ubiquinone] flavoprotein 1, mitochondrial [Tribolium castaneum]
CUFF41.39.1	BTA009487.1,novel_T006045	913.05	1076.25	785.64	795.39	965.15	1357.28	845.89	1021.83	-	-	ko01100//Metabolic pathways;ko05016//Huntington's disease;ko05010//Alzheimer's disease;ko05012//Parkinson's disease;ko00190//Oxidative phosphorylation;ko04932//Non-alcoholic fatty liver disease (NAFLD);ko04260//Cardiac muscle contraction	GO:0016021//integral component of membrane	GO:0008121//ubiquinol-cytochrome-c reductase activity;GO:0009055//electron carrier activity	GO:1902600//hydrogen ion transmembrane transport	gi|752895627|ref|XP_011266044.1|/3.20559e-13/PREDICTED: cytochrome b-c1 complex subunit 10-like [Camponotus floridanus]
Btabaci_GLEAN_10012950	BTA028683.1,novel_T017137,novel_T017138,novel_T017139	906.17	1118.72	733.59	725.54	860.05	838.04	809.06	824.43	-	-	-	-	-	-	gi|939684848|ref|XP_014286882.1|/0/PREDICTED: mitochondrial-processing peptidase subunit beta [Halyomorpha halys]
Btabaci_GLEAN_10025837	BTA014292.1	894.08	1116.99	746.7	662.64	1028.53	1216.1	963.71	1076.01	-	-	ko01100//Metabolic pathways;ko05016//Huntington's disease;ko05010//Alzheimer's disease;ko05012//Parkinson's disease;ko00190//Oxidative phosphorylation;ko04932//Non-alcoholic fatty liver disease (NAFLD);ko04260//Cardiac muscle contraction	GO:0005743//mitochondrial inner membrane;GO:0070469//respiratory chain	GO:0008121//ubiquinol-cytochrome-c reductase activity;GO:0046872//metal ion binding;GO:0051537//2 iron, 2 sulfur cluster binding	GO:0055114//oxidation-reduction process;GO:1902600//hydrogen ion transmembrane transport	gi|557753775|ref|XP_005176632.1|/2.39744e-83/PREDICTED: cytochrome b-c1 complex subunit Rieske, mitochondrial isoform X2 [Musca domestica]
Btabaci_GLEAN_10007523	BTA007222.1,novel_T004668	891.88	1122.18	729.31	658.8	1164.67	1833.63	1106.11	1534.04	-	-	-	-	-	-	gi|501290693|dbj|BAN20231.1|/3.8134e-49/gamma-subunit,methylmalonyl-CoA decarboxylase, putative [Riptortus pedestris]
Btabaci_GLEAN_10024565	BTA025848.1,novel_T015427,novel_T015428,novel_T015429	880.14	829.62	799.26	707.99	613.23	377.56	468.32	515.46	-	-	-	GO:0016021//integral component of membrane	GO:0004497//monooxygenase activity;GO:0005506//iron ion binding;GO:0016705//oxidoreductase activity, acting on paired donors, with incorporation or reduction of molecular oxygen;GO:0020037//heme binding	GO:0055114//oxidation-reduction process	gi|182894140|gb|ACA51846.1|/0/cytochrome P450 YP6CM1vQ [Bemisia tabaci]
Btabaci_GLEAN_10018083	BTA019847.1,novel_T011964,novel_T011965,novel_T011966	880	2365.56	562.47	450.85	2868.86	1900.04	4446.6	2305.15	-	-	ko05146//Amoebiasis;ko05110//Vibrio cholerae infection	-	-	-	gi|315307980|gb|ADU04393.1|/0/vitellogenin [Bemisia tabaci]
CUFF66.15.1	BTA015504.1,novel_T009734,novel_T009735,novel_T009736,novel_T009737,novel_T009738,novel_T009739	865.72	663.3	1059.24	1057.41	743.5	1080.63	666.1	891.6	-	-	ko04810//Regulation of actin cytoskeleton;ko04666//Fc gamma R-mediated phagocytosis;ko05203//Viral carcinogenesis	-	-	-	gi|662182960|ref|XP_008470658.1|/0/PREDICTED: gelsolin-like [Diaphorina citri]
CUFF17.477.1	BTA003847.2,novel_T002687,novel_T002688	862.76	792.65	754.72	899.01	877.11	1695.73	774.2	1103.33	-	-	ko00910//Nitrogen metabolism	-	-	-	gi|985386071|ref|XP_015367654.1|/2.13357e-65/PREDICTED: carbonic anhydrase 7-like isoform X2 [Diuraphis noxia]
Btabaci_GLEAN_10026886	BTA024634.1,novel_T014789	862.07	1102.1	600.92	647.97	870.73	853.53	760.68	843.26	-	-	ko01100//Metabolic pathways;ko05016//Huntington's disease;ko05010//Alzheimer's disease;ko05012//Parkinson's disease;ko00190//Oxidative phosphorylation	-	-	-	gi|939672199|ref|XP_014282632.1|/3.6081e-68/PREDICTED: ATP synthase subunit b, mitochondrial [Halyomorpha halys]
Btabaci_GLEAN_10018305	BTA019153.1	856.52	1126.36	659.41	643.38	1004.14	1193.4	986.86	1028.73	-	-	ko01100//Metabolic pathways;ko05016//Huntington's disease;ko05010//Alzheimer's disease;ko05012//Parkinson's disease;ko00190//Oxidative phosphorylation;ko04932//Non-alcoholic fatty liver disease (NAFLD);ko04260//Cardiac muscle contraction	-	-	-	gi|662184568|ref|XP_008472514.1|/1.92743e-53/PREDICTED: cytochrome c oxidase subunit 4 isoform 2, mitochondrial-like [Diaphorina citri]
Btabaci_GLEAN_10007553	BTA007166.1,novel_T004607	846.81	706.21	925.47	831.51	709.65	770.36	674.77	720.92	-	-	ko04810//Regulation of actin cytoskeleton	-	-	-	gi|939681953|ref|XP_014285920.1|/9.20171e-19/PREDICTED: glycine-rich cell wall structural protein 1-like [Halyomorpha halys]
Btabaci_GLEAN_10009661	BTA003776.1,novel_T002621	836.44	797.67	792.99	704.24	693.19	516.11	510.2	559.31	-	-	ko05206//MicroRNAs in cancer;ko05414//Dilated cardiomyopathy;ko05410//Hypertrophic cardiomyopathy (HCM);ko04261//Adrenergic signaling in cardiomyocytes;ko04260//Cardiac muscle contraction	-	-	-	gi|662195007|ref|XP_008470475.1|/0/PREDICTED: tropomyosin-1 [Diaphorina citri]
Btabaci_GLEAN_10023420	BTA001894.1,novel_T001223,novel_T001224,novel_T001225,novel_T001226,novel_T001227	820.2	753.69	734.44	675.03	1048.72	1222.37	924.47	1013.93	-	-	-	-	-	-	gi|930664432|gb|KPJ05750.1|/6.12953e-25/Putative odorant-binding protein A10 [Papilio xuthus]
Btabaci_GLEAN_10018189	BTA019552.1,novel_T011826	802.31	767.67	691.68	672.18	1023.76	1121.72	899.27	1027.59	-	-	ko05146//Amoebiasis;ko05110//Vibrio cholerae infection	-	-	-	gi|939679280|ref|XP_014285084.1|/9.18177e-59/PREDICTED: uncharacterized protein LOC106686355 isoform X2 [Halyomorpha halys]
Btabaci_GLEAN_10020179	BTA014090.2,novel_T008885	797.03	524.33	1056.56	1190.42	294.15	179.52	75.26	84.98	-	-	ko04810//Regulation of actin cytoskeleton;ko04666//Fc gamma R-mediated phagocytosis;ko05100//Bacterial invasion of epithelial cells;ko05131//Shigellosis;ko04520//Adherens junction;ko05231//Choline metabolism in cancer;ko05132//Salmonella infection	-	-	-	gi|3023587|sp|P80674.1|CU01_BLACR/9.41177e-38/RecName: Full=Cuticle protein 1; AltName: Full=Bc-NCP1 [Blaberus craniifer]
Btabaci_GLEAN_10020212	BTA014053.1,novel_T008866,novel_T008867,novel_T008868,novel_T008869	794.09	1093.02	617.42	704.57	1363.58	1374.81	1764.15	1560.83	-	-	ko03013//RNA transport;ko05134//Legionellosis	-	-	-	gi|924560850|gb|ALC45508.1|/0/Ef1alpha48D [Drosophila busckii]
CUFF111.52.1	BTA026916.1	774.41	733.39	793.09	776.11	908.1	1281.59	896.02	1117.86	-	-	ko03320//PPAR signaling pathway	-	-	-	gi|60678801|gb|AAX33735.1|/1.06261e-61/MPA13 allergen [Periplaneta americana]
Btabaci_GLEAN_10006295	BTA009445.1,novel_T006010	772.5	866.14	534.82	508.04	673.1	657.53	546.17	583.56	-	-	ko01100//Metabolic pathways;ko05016//Huntington's disease;ko05010//Alzheimer's disease;ko05012//Parkinson's disease;ko00190//Oxidative phosphorylation	-	-	-	gi|501291752|dbj|BAN20400.1|/2.81721e-152/ATP synthase gamma subunit [Riptortus pedestris]
Btabaci_GLEAN_10020741	BTA012311.1,novel_T007720,novel_T007721	768.51	913.38	605.58	596.26	752.72	963.97	715.78	771.91	-	-	ko01100//Metabolic pathways;ko00190//Oxidative phosphorylation	GO:0016020//membrane	-	-	gi|662202808|ref|XP_008474714.1|/2.22925e-39/PREDICTED: putative ATP synthase subunit f, mitochondrial [Diaphorina citri]
Btabaci_GLEAN_10026241	BTA007672.1,novel_T004922,novel_T004923,novel_T004924,novel_T004925,novel_T004926,novel_T004927	767.51	1018.89	734.21	724.53	832.56	548.73	819.05	793.69	-	-	ko04919//Thyroid hormone signaling pathway;ko05414//Dilated cardiomyopathy;ko04022//cGMP-PKG signaling pathway;ko05410//Hypertrophic cardiomyopathy (HCM);ko04530//Tight junction;ko04261//Adrenergic signaling in cardiomyocytes;ko05416//Viral myocarditis;ko04260//Cardiac muscle contraction	GO:0016459//myosin complex	GO:0003774//motor activity;GO:0003779//actin binding;GO:0005524//ATP binding	-	gi|195344578|ref|XP_002038858.1|/0/GM17204 [Drosophila sechellia]
Btabaci_GLEAN_10024781	BTA024654.1,novel_T014806,novel_T014807	732.76	921.87	573.41	548.76	757.47	727.22	669.68	735.15	-	-	-	-	-	-	gi|646723792|gb|KDR24286.1|/0/hypothetical protein L798_06748 [Zootermopsis nevadensis]
Btabaci_GLEAN_10018367	BTA018957.1	721.95	815.2	630.57	625.39	760.04	505.52	673.27	672.08	-	-	ko01100//Metabolic pathways;ko05016//Huntington's disease;ko01200//Carbon metabolism;ko05010//Alzheimer's disease;ko05012//Parkinson's disease;ko00190//Oxidative phosphorylation;ko04932//Non-alcoholic fatty liver disease (NAFLD);ko00020//Citrate cycle (TCA cycle)	-	-	-	gi|480310431|gb|AGJ76544.1|/0/succinate dehydrogenase flavoprotein subunit [Bemisia tabaci]
Btabaci_GLEAN_10009969	BTA003197.1,novel_T002206	715.93	599.85	577.2	716.63	731.4	1214.65	696.14	982.45	-	-	ko01100//Metabolic pathways;ko00510//N-Glycan biosynthesis	-	-	-	gi|1000734862|ref|XP_015589894.1|/9.39746e-07/PREDICTED: serine/arginine repetitive matrix protein 1-like isoform X6 [Cephus cinctus]
Btabaci_GLEAN_10010029	BTA003120.1,novel_T002112	705.56	552.81	837.69	829.98	619.85	792.43	629.29	750.88	-	-	-	-	-	-	gi|662202557|ref|XP_008474579.1|/2.82716e-44/PREDICTED: prohormone-3 [Diaphorina citri]
Btabaci_GLEAN_10012565	BTA029338.1,novel_T017645	704.41	624.39	774.04	816.89	774.79	955.23	773.79	906.66	-	-	ko05146//Amoebiasis;ko04810//Regulation of actin cytoskeleton;ko05205//Proteoglycans in cancer;ko04015//Rap1 signaling pathway;ko04151//PI3K-Akt signaling pathway;ko04510//Focal adhesion;ko04145//Phagosome;ko04514//Cell adhesion molecules (CAMs);ko05166//HTLV-I infection;ko05414//Dilated cardiomyopathy;ko04670//Leukocyte transendothelial migration;ko05410//Hypertrophic cardiomyopathy (HCM);ko0439…	-	-	-	gi|646701025|gb|KDR10948.1|/2.17016e-159/Transforming growth factor-beta-induced protein ig-h3 [Zootermopsis nevadensis]
Btabaci_GLEAN_10017026	BTA022169.1,novel_T013608,novel_T013609	686.65	493.26	835.48	859.53	453.68	255.09	385.5	410.99	-	-	ko04919//Thyroid hormone signaling pathway;ko04024//cAMP signaling pathway;ko04022//cGMP-PKG signaling pathway;ko04974//Protein digestion and absorption;ko04976//Bile secretion;ko04970//Salivary secretion;ko04261//Adrenergic signaling in cardiomyocytes;ko04972//Pancreatic secretion;ko04971//Gastric acid secretion;ko04978//Mineral absorption;ko04911//Insulin secretion;ko04918//Thyroid hormone synt…	-	-	-	gi|407731564|gb|AFU25668.1|/0/Na+,K+ ATPase alpha-subunit 1 [Boisea trivittata]
Btabaci_GLEAN_10015085	BTA025607.1,novel_T015296,novel_T015297	682.34	994.65	376.93	369.27	492.95	369.79	354.74	355.01	-	-	-	GO:0016021//integral component of membrane	-	GO:0006810//transport	gi|751465843|ref|XP_011187926.1|/0/PREDICTED: phosphate carrier protein, mitochondrial [Bactrocera cucurbitae]
Btabaci_GLEAN_10020765	BTA012252.2,novel_T007688	679.88	619.6	582.61	743.39	633.14	1042.53	592.74	750.46	-	-	ko04550//Signaling pathways regulating pluripotency of stem cells	-	-	-	gi|242046608|ref|XP_002400339.1|/3.53478e-19/hypothetical protein IscW_ISCW018444 [Ixodes scapularis]
Btabaci_GLEAN_10024388	BTA027260.1,novel_T016383	667.6	767.53	678.91	527.69	1156.52	1121.26	1296.21	1468.29	-	-	ko01100//Metabolic pathways;ko01230//Biosynthesis of amino acids;ko00310//Lysine degradation;ko00380//Tryptophan metabolism;ko01210//2-Oxocarboxylic acid metabolism;ko00300//Lysine biosynthesis	-	GO:0016740//transferase activity	-	gi|641678466|ref|XP_008188167.1|/4.96129e-171/PREDICTED: kynurenine/alpha-aminoadipate aminotransferase, mitochondrial-like [Acyrthosiphon pisum]
Btabaci_GLEAN_10018252	BTA019276.1,novel_T011585,novel_T011586	663.28	815.73	470.41	489.66	589.08	545.97	586.72	579.14	-	-	ko01100//Metabolic pathways;ko05016//Huntington's disease;ko05010//Alzheimer's disease;ko05012//Parkinson's disease;ko00190//Oxidative phosphorylation	-	-	-	gi|751229673|ref|XP_011168311.1|/0/PREDICTED: ATP synthase subunit alpha, mitochondrial [Solenopsis invicta]
Btabaci_GLEAN_10006147	BTA009705.3,novel_T006195,novel_T006196,novel_T006197,novel_T006198,novel_T006199	653.59	746.65	580.78	579.37	869.09	699.18	755.52	801.35	-	-	-	-	-	-	gi|242247181|ref|NP_001156347.1|/1.90675e-49/ZM-domain protein [Acyrthosiphon pisum]
CUFF57.42.2	BTA013611.1,novel_T008581	642.94	730.24	465.56	454.52	720.76	950.85	725.24	780.97	-	-	ko01100//Metabolic pathways;ko05016//Huntington's disease;ko05010//Alzheimer's disease;ko05012//Parkinson's disease;ko00190//Oxidative phosphorylation;ko04932//Non-alcoholic fatty liver disease (NAFLD);ko04260//Cardiac muscle contraction	GO:0005739//mitochondrion;GO:0016020//membrane	-	-	gi|646719446|gb|KDR21558.1|/1.07777e-31/Cytochrome b-c1 complex subunit 7 [Zootermopsis nevadensis]
Btabaci_GLEAN_10016388	BTA023292.1,novel_T014171,novel_T014172,novel_T014173,novel_T014174	627.28	659.73	516.6	464.39	537.26	362.81	415.06	405.2	-	-	-	-	-	-	gi|662207368|ref|XP_008477184.1|/6.08897e-140/PREDICTED: troponin T, partial [Diaphorina citri]
Btabaci_GLEAN_10025180	BTA021328.2,novel_T013040	626.41	629.4	559.45	485.15	457.42	328.4	320.42	419.71	-	-	ko05206//MicroRNAs in cancer;ko05414//Dilated cardiomyopathy;ko05410//Hypertrophic cardiomyopathy (HCM);ko04261//Adrenergic signaling in cardiomyocytes;ko04260//Cardiac muscle contraction	-	-	-	gi|930675552|gb|KPJ15810.1|/1.24861e-71/Tropomyosin-1, isoforms 9A/A/B [Papilio machaon]
Btabaci_GLEAN_10002410	BTA017106.1,novel_T010647,novel_T010648,novel_T010649	615.78	579.18	559.91	631.33	644.72	1256.53	642.36	851.46	-	-	ko04142//Lysosome	-	-	-	gi|930650650|gb|KPI92995.1|/1.08199e-15/Viral cathepsin [Papilio xuthus]
Btabaci_GLEAN_10024671	BTA025382.1,novel_T015195	608.07	617.72	529.54	546.67	571.51	551.44	678.69	653.69	-	-	ko04145//Phagosome;ko05130//Pathogenic Escherichia coli infection;ko04540//Gap junction	-	-	-	gi|480310423|gb|AGJ76540.1|/0/alpha-tubulin [Bemisia tabaci]
Btabaci_GLEAN_10009585	BTA003886.2	606.84	98.02	505.14	578.62	804.49	1050.74	573.32	946.6	-	-	ko05169//Epstein-Barr virus infection;ko04144//Endocytosis;ko03040//Spliceosome;ko04141//Protein processing in endoplasmic reticulum;ko04010//MAPK signaling pathway;ko05145//Toxoplasmosis;ko05164//Influenza A;ko04612//Antigen processing and presentation;ko04915//Estrogen signaling pathway;ko05134//Legionellosis;ko05020//Prion diseases;ko05162//Measles	-	-	-	gi|269859258|gb|ACZ52196.1|/0/heat shock protein 70 [Bemisia tabaci]
Btabaci_GLEAN_10020672	BTA012500.1,novel_T007802,novel_T007803	599.89	688.14	447.23	410.63	486.85	522.23	397.47	472.87	-	-	-	-	-	-	gi|939691775|ref|XP_014289893.1|/1.30076e-36/PREDICTED: uncharacterized protein C19orf43 [Halyomorpha halys]
Btabaci_GLEAN_10019588	BTA016183.1,novel_T010126,novel_T010127,novel_T010128,novel_T010129,novel_T010130,novel_T010131,novel_T010132,novel_T010133,novel_T010134	591.6	559.28	494.94	516.91	577.37	639.89	491.44	564.72	-	-	-	-	-	-	gi|619831258|gb|AHY18683.1|/0/Argonaute2 [Bemisia tabaci]
Btabaci_GLEAN_10022580	BTA005266.1,novel_T003521,novel_T003522	591.37	504.96	660.9	636.32	491.31	398.07	420.12	452.54	-	-	ko01100//Metabolic pathways;ko00270//Cysteine and methionine metabolism	-	-	-	gi|939683624|ref|XP_014286465.1|/1.75154e-52/PREDICTED: uncharacterized protein LOC106687221 [Halyomorpha halys]
Btabaci_GLEAN_10018034	BTA020045.1,novel_T012141	579.82	486.63	626.43	577.64	633.32	731.96	632.14	779.51	-	-	ko00480//Glutathione metabolism	-	GO:0004602//glutathione peroxidase activity	GO:0006979//response to oxidative stress;GO:0055114//oxidation-reduction process;GO:0098869//cellular oxidant detoxification	gi|723784138|gb|AIY24301.1|/2.68122e-123/phospholipid hydroperoxide glutathione peroxidase 2 [Bemisia tabaci]
Btabaci_GLEAN_10017022	BTA022164.1,novel_T013603	576.47	409.11	622.33	594.89	419.41	338.65	411.27	467.68	-	-	-	-	-	-	-
Btabaci_GLEAN_10003043	BTA015671.1,novel_T009856,novel_T009857	569.23	478.79	415.37	578.33	501.53	949.66	471.57	714.06	-	-	ko04514//Cell adhesion molecules (CAMs);ko04520//Adherens junction;ko04670//Leukocyte transendothelial migration	-	-	-	gi|807029103|ref|XP_012157439.1|/3.43314e-17/PREDICTED: integumentary mucin C.1-like [Ceratitis capitata]
Btabaci_GLEAN_10023083	BTA003308.1,novel_T002320	566.25	454.8	701.98	696.26	512.43	457.15	488.42	607.61	-	-	ko04940//Type I diabetes mellitus	-	GO:0004181//metallocarboxypeptidase activity;GO:0008270//zinc ion binding	GO:0006508//proteolysis	gi|189242016|ref|XP_001807518.1|/2.6072e-77/PREDICTED: carboxypeptidase E [Tribolium castaneum]
Btabaci_GLEAN_10009836	BTA003473.1,novel_T002410	562.92	478.56	623.52	619.12	540.31	491.49	492.85	553.74	-	-	-	-	-	-	gi|646700552|gb|KDR10662.1|/9.93189e-45/Integral membrane protein 2B [Zootermopsis nevadensis]
Btabaci_GLEAN_10017137	BTA021951.2,novel_T013447	556.47	388.25	761.71	770.44	463.21	825.4	392.84	573.89	-	-	-	-	-	-	gi|557356264|dbj|BAO03860.1|/1.23056e-177/UVopsin2 [Sogatella furcifera]
Btabaci_GLEAN_10019340	BTA016919.1	547.36	608.77	517.98	501.14	539.78	460.22	581.51	535.55	-	-	ko05110//Vibrio cholerae infection;ko04810//Regulation of actin cytoskeleton;ko05205//Proteoglycans in cancer;ko04015//Rap1 signaling pathway;ko05100//Bacterial invasion of epithelial cells;ko04919//Thyroid hormone signaling pathway;ko04510//Focal adhesion;ko04145//Phagosome;ko05131//Shigellosis;ko04611//Platelet activation;ko05130//Pathogenic Escherichia coli infection;ko04520//Adherens junction…	GO:0005737//cytoplasm;GO:0005811//lipid particle;GO:0005875//microtubule associated complex;GO:0005884//actin filament;GO:0031011//Ino80 complex;GO:0035060//brahma complex	GO:0005200//structural constituent of cytoskeleton;GO:0005524//ATP binding	GO:0000281//mitotic cytokinesis;GO:0002121//inter-male aggressive behavior;GO:0006338//chromatin remodeling;GO:0006909//phagocytosis;GO:0007010//cytoskeleton organization;GO:0007291//sperm individualization;GO:0016319//mushroom body development;GO:0032507//maintenance of protein location in cell;GO:0035148//tube formation	gi|17530805|ref|NP_511052.1|/0/actin 5C, isoform B [Drosophila melanogaster]
Btabaci_GLEAN_10009437	BTA004130.3,novel_T002860,novel_T002861,novel_T002862,novel_T002863,novel_T002864	538.87	337.9	593.11	569.55	434.7	811.14	443.48	618.6	-	-	ko03013//RNA transport;ko03015//mRNA surveillance pathway	-	-	-	gi|939242884|ref|XP_014240732.1|/3.04199e-33/PREDICTED: tachykinins [Cimex lectularius]
Btabaci_GLEAN_10026825	BTA026303.1,novel_T015743,novel_T015744	537.79	496.34	675.6	639.58	409.98	475.88	326.3	399.27	-	-	ko04919//Thyroid hormone signaling pathway;ko05206//MicroRNAs in cancer;ko04320//Dorso-ventral axis formation;ko05020//Prion diseases;ko04330//Notch signaling pathway	-	-	-	gi|985416335|ref|XP_015373620.1|/3.17751e-180/PREDICTED: protein eyes shut [Diuraphis noxia]
Btabaci_GLEAN_10026499	BTA002356.3,novel_T001541,novel_T001542	533.04	497.5	615.32	621.68	556.37	513.76	478.64	539.13	-	-	ko01100//Metabolic pathways;ko01230//Biosynthesis of amino acids;ko04724//Glutamatergic synapse;ko00250//Alanine, aspartate and glutamate metabolism;ko00630//Glyoxylate and dicarboxylate metabolism;ko04727//GABAergic synapse;ko00220//Arginine biosynthesis;ko00910//Nitrogen metabolism	-	-	-	gi|478896864|gb|AGJ70738.1|/0/glutamine synthetase 2 [Nilaparvata lugens]
Btabaci_GLEAN_10006583	BTA008892.1,novel_T005622	531.67	614.06	377.73	394.11	751.86	602.25	852.12	858.1	-	-	-	-	-	-	gi|910312145|ref|XP_013167962.1|/5.8441e-20/PREDICTED: pro-resilin isoform X1 [Papilio xuthus]
Btabaci_GLEAN_10009982	BTA003180.1	529.37	461.44	457.67	437.99	519.09	503.11	433.32	487.01	-	-	ko04141//Protein processing in endoplasmic reticulum;ko04010//MAPK signaling pathway;ko04932//Non-alcoholic fatty liver disease (NAFLD);ko04722//Neurotrophin signaling pathway;ko04071//Sphingolipid signaling pathway;ko05014//Amyotrophic lateral sclerosis (ALS);ko04668//TNF signaling pathway	-	-	-	gi|91081549|ref|XP_975000.1|/1.2925e-107/PREDICTED: muscle-specific protein 20 [Tribolium castaneum]
Btabaci_GLEAN_10006843	BTA008473.1,novel_T005462	528.14	386.13	624.01	612.94	460.34	597.49	444.04	582.58	-	-	-	-	-	-	gi|152061158|dbj|BAF73623.1|/6.77118e-39/imaginal disk growth factor [Bombyx mori]
Btabaci_GLEAN_10006366	BTA009347.1,novel_T005958	520.93	546.94	537.88	537.51	446.22	502.24	418.31	474.98	-	-	ko05016//Huntington's disease;ko05166//HTLV-I infection;ko04022//cGMP-PKG signaling pathway;ko05012//Parkinson's disease;ko04020//Calcium signaling pathway	-	-	-	gi|46561750|gb|AAT01080.1|/3.42665e-121/putative mitochondrial porin [Homalodisca vitripennis]
Btabaci_GLEAN_10022315	BTA006459.1,novel_T004108,novel_T004109,novel_T004110,novel_T004111,novel_T004112	503.59	342.23	681.3	599.86	470.3	809.91	423.69	636.67	-	-	-	-	-	-	gi|646709646|gb|KDR15405.1|/7.3711e-142/Fatty-acid amide hydrolase 2-A [Zootermopsis nevadensis]
CUFF97.598.1	BTA023754.1,novel_T014326,novel_T014327,novel_T014328	502.07	483.36	545.53	518.53	563.22	831.64	448.17	610.31	-	-	ko03013//RNA transport	-	-	-	gi|755865162|ref|XP_011291097.1|/4.75872e-67/PREDICTED: histidine-rich glycoprotein-like isoform X1 [Musca domestica]
Btabaci_GLEAN_10019099	BTA017613.1	498.8	611.1	426.92	417.36	588.2	683.78	649.1	643.88	-	-	ko01100//Metabolic pathways;ko01200//Carbon metabolism;ko01230//Biosynthesis of amino acids;ko00010//Glycolysis / Gluconeogenesis;ko00562//Inositol phosphate metabolism;ko00051//Fructose and mannose metabolism	-	GO:0004807//triose-phosphate isomerase activity	GO:0006094//gluconeogenesis;GO:0006096//glycolytic process;GO:0006098//pentose-phosphate shunt	gi|1009376924|gb|KYN00292.1|/2.6184e-141/Triosephosphate isomerase [Cyphomyrmex costatus]
Btabaci_GLEAN_10022460	BTA005811.1	498.48	668.31	393.26	400.52	719.95	1015.52	859.64	804.15	-	-	ko03010//Ribosome	-	-	-	gi|501297464|dbj|BAN21161.1|/6.65195e-172/ribosomal protein S2 [Riptortus pedestris]
Btabaci_GLEAN_10025987	BTA011658.1,novel_T007360	495.95	663.62	443.04	444.72	649.71	662.05	704.31	694.73	-	-	ko04978//Mineral absorption	-	GO:0016491//oxidoreductase activity;GO:0046872//metal ion binding	GO:0044699	gi|240848575|ref|NP_001155797.1|/3.09548e-76/ferritin-like precursor [Acyrthosiphon pisum]
Btabaci_GLEAN_10017701	BTA020773.1	495.62	347.91	576.78	623.28	325.67	125.24	291.97	308.65	-	-	ko04919//Thyroid hormone signaling pathway;ko04024//cAMP signaling pathway;ko04022//cGMP-PKG signaling pathway;ko04974//Protein digestion and absorption;ko04976//Bile secretion;ko04970//Salivary secretion;ko04261//Adrenergic signaling in cardiomyocytes;ko04972//Pancreatic secretion;ko04971//Gastric acid secretion;ko04978//Mineral absorption;ko04911//Insulin secretion;ko04918//Thyroid hormone synt…	GO:0016021//integral component of membrane	-	GO:0015672//monovalent inorganic cation transport;GO:0030001//metal ion transport	gi|970910894|ref|XP_015121640.1|/4.28765e-160/PREDICTED: sodium/potassium-transporting ATPase subunit beta-2-like [Diachasma alloeum]
Btabaci_GLEAN_10001920	BTA018204.1,novel_T011181	493.64	593.61	415.87	397.62	561.03	568.12	595.26	600.63	-	-	ko01100//Metabolic pathways;ko01200//Carbon metabolism;ko01230//Biosynthesis of amino acids;ko03018//RNA degradation;ko00010//Glycolysis / Gluconeogenesis;ko04066//HIF-1 signaling pathway	GO:0000015//phosphopyruvate hydratase complex	GO:0000287//magnesium ion binding;GO:0004634//phosphopyruvate hydratase activity	GO:0006096//glycolytic process	gi|53830714|gb|AAU95200.1|/0/enolase [Oncometopia nigricans]
Btabaci_GLEAN_10013950	BTA027235.2,novel_T016365	487.47	254.94	297.5	391.26	354.33	421.15	407.14	612.58	-	-	ko04380//Osteoclast differentiation	-	-	-	gi|817076761|ref|XP_012260670.1|/9.38708e-41/PREDICTED: sequestosome-1 [Athalia rosae]
Btabaci_GLEAN_10022979	BTA003664.1,novel_T002557,novel_T002558	487.38	377.43	585.98	591.63	427.18	431.34	395.15	493.14	-	-	-	-	-	-	gi|646715773|gb|KDR19261.1|/0/hypothetical protein L798_06681, partial [Zootermopsis nevadensis]
Btabaci_GLEAN_10012660	BTA029209.1,novel_T017570	483.72	350.77	601.95	580.09	330.47	291.12	309.49	355.77	-	-	ko05010//Alzheimer's disease;ko04726//Serotonergic synapse	-	-	-	gi|939267229|ref|XP_014253723.1|/0/PREDICTED: beta-amyloid-like protein [Cimex lectularius]
Btabaci_GLEAN_10023551	BTA001442.2,novel_T000920,novel_T000921,novel_T000922	477.83	390.8	389.73	453.09	446.86	512.83	570.95	671.07	-	-	ko05205//Proteoglycans in cancer;ko03040//Spliceosome;ko05202//Transcriptional misregulation in cancer	-	-	-	gi|907736412|ref|XP_013115753.1|/0/PREDICTED: ATP-dependent RNA helicase p62 isoform X3 [Stomoxys calcitrans]
Btabaci_GLEAN_10024429	BTA026817.3	476.88	331.98	690.69	665.66	396.22	508.18	321.79	413.67	-	-	-	GO:0016020//membrane	GO:0038023//signaling receptor activity	GO:0007165//signal transduction	gi|557356274|dbj|BAO03865.1|/1.06756e-169/blue opsin [Nephotettix cincticeps]
Btabaci_GLEAN_10025316	BTA020194.1,novel_T012254,novel_T012255,novel_T012256,novel_T012257	476.53	628.38	371.07	357.48	405.87	437.37	359.18	416.56	-	-	-	-	-	-	gi|646704391|gb|KDR12594.1|/6.61514e-149/Serine/threonine-protein kinase VRK1 [Zootermopsis nevadensis]
Btabaci_GLEAN_10016084	BTA023801.1,novel_T014364,novel_T014365,novel_T014366,novel_T014367,novel_T014368	474.05	294.92	644.48	612.68	330.37	328.75	288.8	379.36	-	-	ko04745//Phototransduction - fly	-	-	-	gi|1000723863|ref|XP_015610406.1|/0/PREDICTED: neither inactivation nor afterpotential protein C isoform X3 [Cephus cinctus]
Btabaci_GLEAN_10017882	BTA020353.2,novel_T012386	472.72	650.9	304.19	287.9	398.07	431.77	374	351.48	-	-	-	-	-	-	gi|751238079|ref|XP_011172968.1|/1.644e-16/PREDICTED: uncharacterized protein LOC105205316 [Solenopsis invicta]
Btabaci_GLEAN_10024028	BTA029261.1,novel_T017594	468.27	476.24	450.78	414.5	326.67	224.87	234.33	262.92	-	-	ko01100//Metabolic pathways;ko00250//Alanine, aspartate and glutamate metabolism;ko00330//Arginine and proline metabolism	-	GO:0003842//1-pyrroline-5-carboxylate dehydrogenase activity;GO:0016620//oxidoreductase activity, acting on the aldehyde or oxo group of donors, NAD or NADP as acceptor	GO:0006537//glutamate biosynthetic process;GO:0006561//proline biosynthetic process;GO:0055114//oxidation-reduction process	gi|985391529|ref|XP_015380475.1|/0/PREDICTED: delta-1-pyrroline-5-carboxylate dehydrogenase, mitochondrial [Diuraphis noxia]
Btabaci_GLEAN_10009967	BTA003195.1,novel_T002199,novel_T002200,novel_T002201	467.53	407.15	431.53	527.25	402.41	511.46	398.85	457.25	-	-	ko05014//Amyotrophic lateral sclerosis (ALS)	-	-	-	gi|357619158|gb|EHJ71838.1|/6.81331e-64/hypothetical protein KGM_17211 [Danaus plexippus]
Btabaci_GLEAN_10026339	BTA005132.1,novel_T003408,novel_T003409,novel_T003410,novel_T003411,novel_T003412,novel_T003413,novel_T003414,novel_T003415,novel_T003416	467.26	361.26	425.84	422.11	337.28	292.83	491.67	436.8	-	-	ko03013//RNA transport;ko03015//mRNA surveillance pathway	-	-	-	gi|662185164|ref|XP_008475669.1|/8.56829e-170/PREDICTED: cyclin-L2 [Diaphorina citri]
Btabaci_GLEAN_10012907	BTA028776.4,novel_T017212,novel_T017213,novel_T017214	463.52	528.61	437.63	433.45	508.51	663.85	500.25	537.84	-	-	ko04810//Regulation of actin cytoskeleton;ko04070//Phosphatidylinositol signaling system;ko00562//Inositol phosphate metabolism	-	-	-	gi|1000197748|gb|KXJ71663.1|/4.15958e-103/hypothetical protein RP20_CCG020008 [Aedes albopictus]
CUFF2.556.1	BTA000387.1	462.92	177.68	578.77	574.26	90.56	34.36	7.17	4	-	-	ko05146//Amoebiasis;ko05110//Vibrio cholerae infection	-	-	-	gi|765333924|ref|XP_011492965.1|/1.49797e-35/AAEL017500-PA [Aedes aegypti]
CUFF31.21.1	BTA007236.1,novel_T004677,novel_T004678	459.41	647.12	339.51	349.08	466.69	584.13	415.59	437.85	-	-	-	-	-	-	gi|668454987|gb|KFB43347.1|/5.80792e-07/hypothetical protein ZHAS_00011141 [Anopheles sinensis]
Btabaci_GLEAN_10012601	BTA029306.1,novel_T017621,novel_T017622	457.98	581.05	443.73	396.07	605.19	1091.03	672.77	700.59	-	-	ko01100//Metabolic pathways;ko00860//Porphyrin and chlorophyll metabolism	-	-	-	gi|817059516|ref|XP_012251268.1|/4.9124e-121/PREDICTED: porphobilinogen deaminase [Athalia rosae]
Btabaci_GLEAN_10026862	BTA024606.1,novel_T014761	453.66	1053.66	186.14	148.63	633.31	597.26	1070.19	441.96	-	-	ko04142//Lysosome	-	GO:0016787//hydrolase activity	-	gi|926607178|ref|XP_013794403.1|/2.6071e-73/PREDICTED: cathepsin L-like [Limulus polyphemus]
Btabaci_GLEAN_10004921	BTA011910.1	444.84	466.57	480.14	466.8	449.97	447.54	495.27	491.8	-	-	ko04145//Phagosome;ko05130//Pathogenic Escherichia coli infection;ko04540//Gap junction	GO:0005737//cytoplasm;GO:0005874//microtubule	GO:0003924//GTPase activity;GO:0005200//structural constituent of cytoskeleton;GO:0005525//GTP binding	GO:0007017//microtubule-based process	gi|817085412|ref|XP_012265395.1|/0/PREDICTED: tubulin beta-1 chain [Athalia rosae]
Btabaci_GLEAN_10012307	BTA029753.1,novel_T017973	443.92	327.37	565.63	528.26	395.77	706.12	401.89	509.13	-	-	-	-	-	-	gi|998517399|ref|XP_015519525.1|/1.96522e-22/PREDICTED: orcokinin peptides type A-like [Neodiprion lecontei]
Btabaci_GLEAN_10026023	BTA010983.1,novel_T006945	441.93	578.41	312.55	306.94	404.26	377.09	371.54	346.63	-	-	ko01100//Metabolic pathways;ko01200//Carbon metabolism;ko00620//Pyruvate metabolism;ko00270//Cysteine and methionine metabolism;ko00630//Glyoxylate and dicarboxylate metabolism;ko00020//Citrate cycle (TCA cycle)	-	GO:0030060//L-malate dehydrogenase activity	GO:0005975//carbohydrate metabolic process;GO:0006108//malate metabolic process;GO:0055114//oxidation-reduction process	gi|1000740809|ref|XP_015593016.1|/1.06206e-164/PREDICTED: malate dehydrogenase, mitochondrial [Cephus cinctus]
CUFF86.1.1	BTA020555.1	441.06	577.64	368.74	459.08	617.46	834.08	850.68	728.15	-	-	ko05169//Epstein-Barr virus infection;ko04144//Endocytosis;ko03040//Spliceosome;ko04141//Protein processing in endoplasmic reticulum;ko04010//MAPK signaling pathway;ko05145//Toxoplasmosis;ko05164//Influenza A;ko04612//Antigen processing and presentation;ko04915//Estrogen signaling pathway;ko05134//Legionellosis;ko05020//Prion diseases;ko05162//Measles	-	-	-	gi|156254075|gb|AAZ17399.2|/0/70 kDa heat shock protein [Bemisia tabaci]
Btabaci_GLEAN_10023994	BTA029369.1,novel_T017670	436.54	342.53	500.33	489.88	505.38	536.23	555.72	651.89	-	-	ko01100//Metabolic pathways;ko00040//Pentose and glucuronate interconversions;ko00051//Fructose and mannose metabolism	-	-	-	gi|646724111|gb|KDR24482.1|/7.48303e-168/Sorbitol dehydrogenase [Zootermopsis nevadensis]
CUFF67.78.1	BTA015769.2,novel_T009922	435.61	373.32	365	448.85	444.08	772.56	438.1	566.02	-	-	ko01200//Carbon metabolism;ko04146//Peroxisome;ko05014//Amyotrophic lateral sclerosis (ALS);ko04068//FoxO signaling pathway;ko00630//Glyoxylate and dicarboxylate metabolism;ko00380//Tryptophan metabolism	-	GO:0004601//peroxidase activity;GO:0005488	GO:0008152//metabolic process;GO:0009987//cellular process;GO:0050896//response to stimulus	gi|242014048|ref|XP_002427710.1|/4.15225e-179/Catalase, putative [Pediculus humanus corporis]
Btabaci_GLEAN_10013962	BTA027226.1,novel_T016353	435.22	336.91	599.61	455.56	398.34	764.95	430.32	560.12	-	-	-	-	-	-	gi|998517399|ref|XP_015519525.1|/1.96522e-22/PREDICTED: orcokinin peptides type A-like [Neodiprion lecontei]
Btabaci_GLEAN_10019847	BTA015287.1,novel_T009585,novel_T009586	434.9	241.72	246.44	256.44	278.34	553.49	248.19	142.69	-	-	ko05016//Huntington's disease;ko04962//Vasopressin-regulated water reabsorption	-	-	-	gi|943937469|ref|XP_014370265.1|/1.17026e-85/PREDICTED: dynactin subunit 4 [Papilio machaon]
Btabaci_GLEAN_10014560	BTA026458.3,novel_T015861,novel_T015862	434.59	672.28	351.66	363.55	700.44	793.6	815.2	798.82	-	-	-	-	-	-	gi|646699136|gb|KDR09917.1|/2.79152e-149/hypothetical protein L798_00354, partial [Zootermopsis nevadensis]
CUFF11.73.1	BTA002484.1,novel_T001651,novel_T001652,novel_T001653,novel_T001654,novel_T001655	431.7	353.3	505.27	482.09	510.79	876.79	454.54	677.19	-	-	-	-	-	-	gi|394305027|gb|AFN26934.1|/2.58119e-20/adipokinetic hormone [Nilaparvata lugens]
CUFF10.368.1	BTA002396.1	428.93	429.66	359.93	490.6	402.17	805.73	341.69	506.48	-	-	-	-	-	-	gi|662187959|ref|XP_008487632.1|/3.16583e-15/PREDICTED: uncharacterized protein LOC103524398 [Diaphorina citri]
Btabaci_GLEAN_10016210	BTA023516.1	423.73	1811.39	13.85	77.48	1007.1	1071.62	2694.56	1903.35	-	-	ko05146//Amoebiasis;ko05110//Vibrio cholerae infection	-	-	-	gi|805818585|ref|XP_012149450.1|/2.53253e-24/PREDICTED: uncharacterized serine-rich protein C215.13-like [Megachile rotundata]
Btabaci_GLEAN_10025986	BTA011657.1	422.28	461.24	359.63	358.86	477.9	662.75	459.36	608.46	-	-	ko04978//Mineral absorption	-	GO:0016491//oxidoreductase activity;GO:0046872//metal ion binding	GO:0044699	gi|428230822|gb|AFY99034.1|/2.95088e-163/ferritin [Bemisia tabaci]
Btabaci_GLEAN_10012778	BTA028950.1,novel_T017321,novel_T017322,novel_T017323	419.37	341.54	516.49	510.8	469.35	684.6	400.02	563.62	-	-	-	-	-	-	gi|549130030|dbj|BAO00963.1|/6.29947e-13/myosuppressin [Nilaparvata lugens]
Btabaci_GLEAN_10014708	BTA026196.1,novel_T015642,novel_T015643	417.37	526.13	337.25	322.36	450.41	563.56	396.17	428.83	-	-	ko01100//Metabolic pathways;ko05016//Huntington's disease;ko05010//Alzheimer's disease;ko05012//Parkinson's disease;ko00190//Oxidative phosphorylation;ko04932//Non-alcoholic fatty liver disease (NAFLD);ko04260//Cardiac muscle contraction	-	-	-	gi|961377062|gb|ALS05275.1|/4.9105e-19/hypothetical protein [Tortanus forcipatus]
Btabaci_GLEAN_10027151	BTA009033.1,novel_T005705	413.58	606.68	277.21	281.51	532.14	679.11	599	699.38	-	-	ko03010//Ribosome	-	-	-	gi|939269113|ref|XP_014254731.1|/1.10437e-118/PREDICTED: 40S ribosomal protein S8 [Cimex lectularius]
Btabaci_GLEAN_10016818	BTA022402.1	405.39	341.56	325.48	415.58	518.35	593.21	417.69	629.56	-	-	-	-	-	-	-
Btabaci_GLEAN_10019763	BTA015564.2,novel_T009798,novel_T009799	405.01	369.08	318.27	396.19	359.83	584.15	289.65	422.42	-	-	-	-	-	-	-
Btabaci_GLEAN_10020664	BTA012558.1,novel_T007840	395.21	328.13	460.39	471.51	392.69	686.65	389.94	497.12	-	-	ko05146//Amoebiasis;ko05110//Vibrio cholerae infection	-	-	-	gi|549130012|dbj|BAO00954.1|/3.37196e-16/FMRFamide [Nilaparvata lugens]
Btabaci_GLEAN_10019318	BTA017001.1,novel_T010590	393.94	370.24	394.8	409.53	369.55	423.34	360.24	389.96	-	-	ko05202//Transcriptional misregulation in cancer;ko05034//Alcoholism;ko05322//Systemic lupus erythematosus	GO:0000786//nucleosome;GO:0005634//nucleus	GO:0003677//DNA binding;GO:0046982//protein heterodimerization activity	-	gi|512938594|ref|XP_004934043.1|/1.30168e-58/PREDICTED: histone H3.3-like, partial [Bombyx mori]
CUFF62.392.2	BTA015017.2,novel_T009446	393.04	302.68	323.35	346.87	265.87	199.98	294.51	286.76	-	-	ko04141//Protein processing in endoplasmic reticulum	-	-	-	gi|985410101|ref|XP_015370481.1|/7.57522e-111/PREDICTED: alpha-crystallin B chain isoform X2 [Diuraphis noxia]
Btabaci_GLEAN_10003327	BTA015094.1,novel_T009464,novel_T009465	389.25	629.23	293.41	311.12	641.35	788.64	773.58	779.97	-	-	ko05205//Proteoglycans in cancer;ko04151//PI3K-Akt signaling pathway;ko04910//Insulin signaling pathway;ko03010//Ribosome;ko04066//HIF-1 signaling pathway;ko04150//mTOR signaling pathway	GO:0005840//ribosome	GO:0003735//structural constituent of ribosome	GO:0006412//translation	gi|288869508|ref|NP_001165861.1|/4.98353e-120/ribosomal protein S6 [Tribolium castaneum]
CUFF82.119.2	BTA019785.1	388.19	319.9	429.03	434.77	338.35	492.23	353.21	406.34	-	-	-	-	-	-	-
Btabaci_GLEAN_10018100	BTA019821.1	388.05	471.8	302.23	274.84	398.79	400.74	349.62	357.44	-	-	ko01100//Metabolic pathways;ko01200//Carbon metabolism;ko01230//Biosynthesis of amino acids;ko00260//Glycine, serine and threonine metabolism;ko00010//Glycolysis / Gluconeogenesis;ko04922//Glucagon signaling pathway;ko05230//Central carbon metabolism in cancer	-	GO:0004619//phosphoglycerate mutase activity	GO:0006096//glycolytic process	gi|1009421138|gb|KYN39614.1|/6.08637e-158/Phosphoglycerate mutase 1, partial [Trachymyrmex septentrionalis]
Btabaci_GLEAN_10010534	BTA002268.1,novel_T001487	388.01	447.16	229.03	237.23	229.22	158.95	203.9	196.32	-	-	ko01100//Metabolic pathways;ko01200//Carbon metabolism;ko01230//Biosynthesis of amino acids;ko00630//Glyoxylate and dicarboxylate metabolism;ko00020//Citrate cycle (TCA cycle);ko01210//2-Oxocarboxylic acid metabolism	GO:0005759//mitochondrial matrix	GO:0004108//citrate (Si)-synthase activity	GO:0005975//carbohydrate metabolic process;GO:0006099//tricarboxylic acid cycle	gi|1000203856|gb|KXJ75524.1|/0/hypothetical protein RP20_CCG011547 [Aedes albopictus]
Btabaci_GLEAN_10022733	BTA004581.1,novel_T003107	385.87	575.89	295.03	301.53	453.09	497.18	429.63	426.59	-	-	ko01100//Metabolic pathways;ko05016//Huntington's disease;ko05010//Alzheimer's disease;ko05012//Parkinson's disease;ko00190//Oxidative phosphorylation	-	-	-	gi|90819982|gb|ABD98749.1|/2.17265e-85/putative ATP synthase oligomycin sensitivity conferral protein [Graphocephala atropunctata]
Btabaci_GLEAN_10013451	BTA028010.1,novel_T016764,novel_T016765,novel_T016766	381.28	363.36	318.76	302.76	419.95	345.94	386.33	372.13	-	-	-	-	-	-	gi|646723596|gb|KDR24143.1|/9.28381e-60/Reticulocyte-binding protein 2-like protein a [Zootermopsis nevadensis]
Btabaci_GLEAN_10013453	BTA028012.1,novel_T016771	378.99	269.3	434.99	420.83	315.73	294.45	296.52	363.69	-	-	-	-	-	-	gi|646715773|gb|KDR19261.1|/0/hypothetical protein L798_06681, partial [Zootermopsis nevadensis]
Btabaci_GLEAN_10016832	BTA022393.1,novel_T013645	375.88	313.95	502.41	395.78	321.07	379.21	357.82	405.88	-	-	ko03013//RNA transport;ko03015//mRNA surveillance pathway	-	-	-	gi|936718433|ref|XP_014237141.1|/1.91543e-24/PREDICTED: flocculation protein FLO11-like [Trichogramma pretiosum]
Btabaci_GLEAN_10007530	BTA007210.1,novel_T004656	372.71	425.29	264.03	263.53	363.98	419.28	356.61	365.8	-	-	ko01100//Metabolic pathways;ko00190//Oxidative phosphorylation	-	-	-	gi|501294588|dbj|BAN20751.1|/3.21673e-33/hypothetical protein [Riptortus pedestris]
Btabaci_GLEAN_10022908	BTA003919.1,novel_T002751,novel_T002752	367.57	282.35	455.23	431.17	321.83	542.3	304.46	405.73	-	-	-	-	-	-	gi|328704845|ref|XP_001943881.2|/3.48644e-109/PREDICTED: peptidyl-alpha-hydroxyglycine alpha-amidating lyase 2 [Acyrthosiphon pisum]
Btabaci_GLEAN_10009832	BTA003480.1,novel_T002414,novel_T002415	367.36	367.59	372.54	346.02	350.36	257.89	313.43	309.29	-	-	-	-	-	-	gi|998510625|ref|XP_015515797.1|/3.99075e-87/PREDICTED: reticulon-1-A isoform X5 [Neodiprion lecontei]
Btabaci_GLEAN_10020315	BTA013707.1,novel_T008634	365.92	164.75	580.04	479.87	115.82	131.89	45.62	72.82	-	-	ko05146//Amoebiasis;ko05110//Vibrio cholerae infection	-	-	-	gi|646714048|gb|KDR18153.1|/2.24522e-66/Larval cuticle protein 2 [Zootermopsis nevadensis]
Btabaci_GLEAN_10024933	BTA023497.1,novel_T014190	362.04	520.33	275.18	288.95	542.51	634.13	652.68	564.64	-	-	ko03010//Ribosome	-	-	-	gi|826414914|ref|XP_012522160.1|/4.10216e-60/PREDICTED: 60S ribosomal protein L6 isoform X2 [Monomorium pharaonis]
Btabaci_GLEAN_10024767	BTA024828.1,novel_T014927,novel_T014928,novel_T014929	361.66	443.95	340.12	334.89	368.67	249.94	286.2	269.75	-	-	ko01100//Metabolic pathways;ko01200//Carbon metabolism;ko00310//Lysine degradation;ko00380//Tryptophan metabolism;ko00020//Citrate cycle (TCA cycle)	-	-	-	gi|826484847|ref|XP_012538863.1|/0/PREDICTED: 2-oxoglutarate dehydrogenase, mitochondrial isoform X7 [Monomorium pharaonis]
Btabaci_GLEAN_10026589	BTA000084.1,novel_T000135,novel_T000136,novel_T000137	360.98	517.23	278.93	260.51	565.4	733.07	690.26	677.07	-	-	ko03010//Ribosome	-	-	-	gi|939695339|ref|XP_014291770.1|/1.83515e-143/PREDICTED: 40S ribosomal protein S4 isoform X2 [Halyomorpha halys]
Btabaci_GLEAN_10025860	BTA013756.1,novel_T008663,novel_T008664,novel_T008665,novel_T008666,novel_T008669	358.89	280.13	442.2	442.75	329.8	266.1	299.68	355.37	-	-	-	-	-	-	gi|662185594|ref|XP_008477892.1|/1.61489e-64/PREDICTED: uncharacterized protein LOC103514764 [Diaphorina citri]
CUFF29.163.1	BTA006814.1	358.24	306.7	397.55	365.04	427.71	640.67	428.22	491.13	-	-	-	-	-	-	-
Btabaci_GLEAN_10003044	BTA015672.1,novel_T009855	357.94	264.7	268.11	373.8	310.84	598.41	290.58	471.41	-	-	ko05014//Amyotrophic lateral sclerosis (ALS)	-	-	-	gi|642921453|ref|XP_008192874.1|/8.26772e-06/PREDICTED: uncharacterized protein LOC663436 isoform X1 [Tribolium castaneum]
Btabaci_GLEAN_10024395	BTA027002.2,novel_T016211,novel_T016212	356.26	365	255.97	342.59	552.69	1174.63	597.1	960.7	-	-	ko04514//Cell adhesion molecules (CAMs);ko04910//Insulin signaling pathway;ko04520//Adherens junction;ko04931//Insulin resistance	-	-	-	-
Btabaci_GLEAN_10021941	BTA007766.1,novel_T004993,novel_T004994,novel_T004995	355.22	421.34	301.58	290.04	371.03	245.84	341.3	318.03	-	-	ko01100//Metabolic pathways;ko00230//Purine metabolism;ko01200//Carbon metabolism;ko01230//Biosynthesis of amino acids;ko05203//Viral carcinogenesis;ko00620//Pyruvate metabolism;ko00010//Glycolysis / Gluconeogenesis;ko04922//Glucagon signaling pathway;ko05230//Central carbon metabolism in cancer;ko04930//Type II diabetes mellitus	-	-	-	gi|646716023|gb|KDR19430.1|/0/Pyruvate kinase [Zootermopsis nevadensis]
Btabaci_GLEAN_10002909	BTA016005.1	354.86	419.48	227.94	234.98	332.97	342.19	313.2	341.07	-	-	ko01100//Metabolic pathways;ko05016//Huntington's disease;ko01200//Carbon metabolism;ko05010//Alzheimer's disease;ko05012//Parkinson's disease;ko00190//Oxidative phosphorylation;ko04932//Non-alcoholic fatty liver disease (NAFLD);ko00020//Citrate cycle (TCA cycle)	-	-	-	gi|987903133|ref|XP_015439040.1|/6.9323e-47/PREDICTED: succinate dehydrogenase cytochrome b560 subunit, mitochondrial-like [Dufourea novaeangliae]
Btabaci_GLEAN_10017077	BTA022091.1,novel_T013549	354.32	332.9	328.41	357.58	260.87	140.64	231.85	175.8	-	-	ko01100//Metabolic pathways;ko00790//Folate biosynthesis	-	-	-	gi|817208610|ref|XP_012280321.1|/1.07591e-160/PREDICTED: GTP cyclohydrolase 1 isoform X1 [Orussus abietinus]
Btabaci_GLEAN_10020161	BTA014213.1,novel_T008972	354.19	584.32	264.91	274.86	599.38	780.17	751.28	629.62	-	-	ko03010//Ribosome	GO:0005840//ribosome	GO:0003735//structural constituent of ribosome	GO:0006412//translation	gi|383851617|ref|XP_003701328.1|/1.51692e-54/PREDICTED: 60S ribosomal protein L36 [Megachile rotundata]
Btabaci_GLEAN_10019850	BTA015290.1,novel_T009584	351.31	166.9	231.83	252.12	317.98	866.52	319.97	253.49	-	-	ko04810//Regulation of actin cytoskeleton;ko04144//Endocytosis;ko04666//Fc gamma R-mediated phagocytosis;ko05100//Bacterial invasion of epithelial cells;ko04062//Chemokine signaling pathway;ko05131//Shigellosis;ko05130//Pathogenic Escherichia coli infection;ko04520//Adherens junction;ko05231//Choline metabolism in cancer;ko05132//Salmonella infection	-	-	-	gi|906461932|gb|KNC24318.1|/8.70864e-07/hypothetical protein FF38_04568 [Lucilia cuprina]
Btabaci_GLEAN_10006881	BTA008419.1,novel_T005408	347.19	329.55	320.39	380.46	366.96	832.13	368.64	540.77	-	-	-	-	-	-	-
Btabaci_GLEAN_10026852	BTA024596.1,novel_T014746	343.69	364.93	354.27	348.48	341.34	422.07	366.49	387.11	-	-	ko05169//Epstein-Barr virus infection;ko04151//PI3K-Akt signaling pathway;ko05130//Pathogenic Escherichia coli infection;ko05203//Viral carcinogenesis;ko04390//Hippo signaling pathway;ko04391//Hippo signaling pathway - fly;ko04110//Cell cycle;ko04114//Oocyte meiosis;ko05161//Hepatitis B	-	GO:0019904//protein domain specific binding	-	gi|939687412|ref|XP_014287708.1|/1.04183e-163/PREDICTED: 14-3-3 protein zeta isoform X1 [Halyomorpha halys]
CUFF101.153.1	BTA024624.1	343.25	371.85	319.7	374.28	380.52	892.97	426.01	605.96	-	-	ko04810//Regulation of actin cytoskeleton	-	-	-	-
CUFF87.822.1	BTA021117.1	342.93	285.84	304.66	394.17	319.78	496.04	279.94	371.35	-	-	ko05146//Amoebiasis;ko05110//Vibrio cholerae infection	-	-	-	gi|557752497|ref|XP_005175997.1|/5.22716e-15/PREDICTED: mucin-2-like [Musca domestica]
Btabaci_GLEAN_10015949	BTA024083.2,novel_T014511	342.84	312.36	341.07	297.7	378.14	413.1	297.91	363.85	-	-	ko04668//TNF signaling pathway	GO:0016021//integral component of membrane	GO:0004623//phospholipase A2 activity;GO:0005262//calcium channel activity	GO:0070588//calcium ion transmembrane transport	gi|939235799|ref|XP_014252706.1|/5.75983e-73/PREDICTED: serine/threonine-protein phosphatase 6 regulatory ankyrin repeat subunit B [Cimex lectularius]
Btabaci_GLEAN_10022886	BTA003999.1,novel_T002802	342.08	241.88	439.9	433.5	296.2	344.33	282.45	320.34	-	-	ko01100//Metabolic pathways;ko04640//Hematopoietic cell lineage;ko00480//Glutathione metabolism;ko04614//Renin-angiotensin system	-	-	-	gi|939269185|ref|XP_014254770.1|/0/PREDICTED: aminopeptidase N-like [Cimex lectularius]
Btabaci_GLEAN_10010256	BTA002736.1,novel_T001798,novel_T001799	341.29	482.71	312.71	315.07	445.18	593.26	558.25	583.6	-	-	ko01100//Metabolic pathways;ko00190//Oxidative phosphorylation;ko00860//Porphyrin and chlorophyll metabolism	GO:0016021//integral component of membrane;GO:0070069//cytochrome complex	GO:0004129//cytochrome-c oxidase activity;GO:0008495//protoheme IX farnesyltransferase activity	GO:0008535//respiratory chain complex IV assembly;GO:0048034//heme O biosynthetic process	gi|195473607|ref|XP_002089084.1|/7.18158e-150/uncharacterized protein Dyak_GE18922 [Drosophila yakuba]
Btabaci_GLEAN_10015670	BTA024561.1,novel_T014698,novel_T014699,novel_T014700,novel_T014701,novel_T014702,novel_T014703	339.08	447.18	216.43	191.52	308.26	255.15	262.99	248.8	-	-	-	-	-	-	gi|501294630|dbj|BAN20764.1|/1.86915e-124/conserved hypothetical protein [Riptortus pedestris]
Btabaci_GLEAN_10003998	BTA013718.2,novel_T008640	337.08	263.42	392.51	407.76	290.64	302.18	262.44	308.93	-	-	ko04550//Signaling pathways regulating pluripotency of stem cells	-	-	-	gi|1004401449|gb|KYB28383.1|/2.90978e-50/Neural proliferation differentiation and control protein 1-like protein [Tribolium castaneum]
Btabaci_GLEAN_10022894	BTA004010.1	335.95	214.66	326.15	348.89	342.26	540.65	409.38	510.96	-	-	ko03013//RNA transport;ko03015//mRNA surveillance pathway	-	-	-	gi|646705110|gb|KDR12989.1|/2.35279e-06/Retinoblastoma-binding protein 6 [Zootermopsis nevadensis]
Btabaci_GLEAN_10021034	BTA011280.1,novel_T007123	331.72	216.01	393.72	395.57	223.48	155.58	193.06	222.29	-	-	-	-	-	-	gi|939263735|ref|XP_014251840.1|/1.8656e-75/PREDICTED: thrombospondin type-1 domain-containing protein 7B-like [Cimex lectularius]
Btabaci_GLEAN_10003879	BTA013965.2,novel_T008833,novel_T008834,novel_T008835	331.34	255.83	423.5	385.03	329.29	568.59	290.01	429.31	-	-	ko01100//Metabolic pathways;ko00250//Alanine, aspartate and glutamate metabolism;ko04727//GABAergic synapse;ko00650//Butanoate metabolism;ko00410//beta-Alanine metabolism;ko00430//Taurine and hypotaurine metabolism;ko04940//Type I diabetes mellitus	-	-	-	gi|939256776|ref|XP_014248186.1|/1.76222e-166/PREDICTED: cysteine sulfinic acid decarboxylase [Cimex lectularius]
CUFF117.39.2	BTA028487.2,novel_T016973,novel_T016974,novel_T016975,novel_T016976,novel_T016977,novel_T016978,novel_T016979,novel_T016980,novel_T016981	328.5	225.36	355.03	402.68	287.35	563.03	285.63	394.36	-	-	-	-	-	-	gi|577706311|gb|AHH85823.1|/1.74372e-20/short neuropeptide F precursor [Schistocerca gregaria]
Btabaci_GLEAN_10014775	BTA026077.1,novel_T015579	327.38	356.73	255.14	266.6	324.65	382.4	277.32	348.74	-	-	ko01100//Metabolic pathways;ko05016//Huntington's disease;ko05010//Alzheimer's disease;ko05012//Parkinson's disease;ko00190//Oxidative phosphorylation;ko04932//Non-alcoholic fatty liver disease (NAFLD)	-	-	-	gi|952511459|gb|KRT78352.1|/3.37658e-43/hypothetical protein AMK59_6522 [Oryctes borbonicus]
Btabaci_GLEAN_10024032	BTA029264.1	326.79	431.59	267.01	257.21	401.89	389.08	356.59	359	-	-	ko01100//Metabolic pathways;ko05016//Huntington's disease;ko05010//Alzheimer's disease;ko05012//Parkinson's disease;ko00190//Oxidative phosphorylation;ko04932//Non-alcoholic fatty liver disease (NAFLD)	-	GO:0016651//oxidoreductase activity, acting on NAD(P)H;GO:0048038//quinone binding;GO:0051287//NAD binding	GO:0055114//oxidation-reduction process	gi|195469361|ref|XP_002099606.1|/0/uncharacterized protein Dyak_GE14510 [Drosophila yakuba]
Btabaci_GLEAN_10024956	BTA023134.1,novel_T014065,novel_T014066	325.37	284.55	275.54	330.55	279.26	141.65	216.37	173.59	-	-	-	GO:0016021//integral component of membrane	GO:0004497//monooxygenase activity;GO:0005506//iron ion binding;GO:0016705//oxidoreductase activity, acting on paired donors, with incorporation or reduction of molecular oxygen;GO:0020037//heme binding	GO:0055114//oxidation-reduction process	gi|182894140|gb|ACA51846.1|/0/cytochrome P450 YP6CM1vQ [Bemisia tabaci]
CUFF61.452.1	BTA014707.1,novel_T009239	322.21	343.94	307.5	299.19	289.09	404.03	307.99	338.17	-	-	ko05016//Huntington's disease;ko04146//Peroxisome;ko05014//Amyotrophic lateral sclerosis (ALS);ko05020//Prion diseases	-	-	-	gi|308208146|gb|ADO20320.1|/6.94314e-115/Cu/Zn superoxide dismutase [Bemisia tabaci]
Btabaci_GLEAN_10024134	BTA028873.1	321.96	504.01	252.04	263.17	560.74	634.91	638.88	644.44	-	-	ko03010//Ribosome	-	-	-	gi|121512020|gb|ABM55461.1|/4.98597e-106/ribosomal protein L19 [Xenopsylla cheopis]
CUFF119.197.1	BTA029151.1	320.44	340.61	258.9	279.56	332.38	491.36	211.01	324.49	-	-	ko01100//Metabolic pathways;ko05012//Parkinson's disease;ko00190//Oxidative phosphorylation	GO:0016020//membrane	GO:0016491//oxidoreductase activity	GO:0055114//oxidation-reduction process	gi|388604641|gb|AFK08569.1|/7.56458e-32/NADH dehydrogenase subunit 4 (mitochondrion) [Bemisia tabaci]
Btabaci_GLEAN_10018136	BTA019712.1,novel_T011889,novel_T011890	320.07	251.99	419.93	382.74	256.18	302.44	210.09	261.9	-	-	ko04310//Wnt signaling pathway	-	-	-	gi|478258842|gb|ENN78847.1|/6.70286e-156/hypothetical protein YQE_04695, partial [Dendroctonus ponderosae]
Btabaci_GLEAN_10007525	BTA007224.1,novel_T004671	319.18	452.79	223.92	223.35	252.92	149.46	186.52	166.14	-	-	ko01100//Metabolic pathways;ko01200//Carbon metabolism;ko01230//Biosynthesis of amino acids;ko00630//Glyoxylate and dicarboxylate metabolism;ko00020//Citrate cycle (TCA cycle);ko01210//2-Oxocarboxylic acid metabolism	-	-	-	gi|815808641|ref|XP_012225163.1|/0/PREDICTED: aconitate hydratase, mitochondrial-like [Linepithema humile]
Btabaci_GLEAN_10023177	BTA002831.1,novel_T001869	318.92	287.77	286.74	338.94	306.79	512	286.55	404.24	-	-	-	-	-	-	-
Btabaci_GLEAN_10025680	BTA016346.1,novel_T010273,novel_T010274	318.66	111.42	449.74	400.73	69.49	19.78	2.7	1.22	-	-	ko03013//RNA transport	-	-	-	gi|662204841|ref|XP_008475812.1|/5.52233e-78/PREDICTED: skin secretory protein xP2-like [Diaphorina citri]
Btabaci_GLEAN_10026849	BTA024593.1,novel_T014743	317.71	236.61	406.18	390.42	252.33	288.99	221.15	276.74	-	-	-	-	-	-	gi|662196937|ref|XP_008471522.1|/1.71877e-104/PREDICTED: retinol dehydrogenase 12-like isoform X2 [Diaphorina citri]
Btabaci_GLEAN_10005171	BTA011419.1,novel_T007214	316.51	401.5	257.07	236.55	382.04	433.45	343.39	350.86	-	-	ko01100//Metabolic pathways;ko05016//Huntington's disease;ko05010//Alzheimer's disease;ko05012//Parkinson's disease;ko00190//Oxidative phosphorylation;ko04932//Non-alcoholic fatty liver disease (NAFLD)	-	-	-	gi|321466001|gb|EFX76999.1|/2.95081e-82/hypothetical protein DAPPUDRAFT_54753, partial [Daphnia pulex]
Btabaci_GLEAN_10025364	BTA019893.1,novel_T012008,novel_T012009	315.98	240.82	420.23	316.51	325.5	480.4	321.78	443.56	-	-	-	-	-	-	gi|347969181|ref|XP_003436379.1|/2.77788e-15/AGAP003060-PB [Anopheles gambiae str. PEST]
Btabaci_GLEAN_10008944	BTA004900.3,novel_T003304,novel_T003305	314.69	266.44	285.29	296.6	342.26	474.41	342	439.88	-	-	-	-	-	-	gi|659100061|gb|AID60342.1|/3.93997e-110/trypsin-8 [Nilaparvata lugens]
Btabaci_GLEAN_10017142	BTA021911.1,novel_T013441	312.83	415.53	313.48	305.28	385.34	470.53	450.95	423.76	-	-	ko04978//Mineral absorption	-	GO:0016491//oxidoreductase activity;GO:0046872//metal ion binding	GO:0044699	gi|428230822|gb|AFY99034.1|/2.95088e-163/ferritin [Bemisia tabaci]
Btabaci_GLEAN_10019415	BTA016664.1,novel_T010409	310.59	249.33	326.82	339.79	208.46	146.18	176.51	161.58	-	-	ko03013//RNA transport;ko03015//mRNA surveillance pathway	-	-	-	gi|170064040|ref|XP_001867361.1|/1.31728e-19/conserved hypothetical protein [Culex quinquefasciatus]
Btabaci_GLEAN_10010828	BTA001760.1,novel_T001109	308.92	215.05	365.66	443.91	265.28	312.56	230.51	326.82	-	-	ko04745//Phototransduction - fly	-	-	-	gi|972178577|ref|XP_015191376.1|/0/PREDICTED: arrestin homolog [Polistes dominula]
Btabaci_GLEAN_10014925	BTA025889.1	308.82	469.96	278.22	288.18	514.84	463.54	653.63	590.25	-	-	ko04152//AMPK signaling pathway;ko04921//Oxytocin signaling pathway	-	-	-	gi|359843236|gb|AEV89753.1|/0/elongation factor 2 [Schistocerca gregaria]
Btabaci_GLEAN_10005460	BTA010906.1	307.26	496.15	230.34	264.96	508.67	646.76	642.83	583.24	-	-	ko03010//Ribosome	GO:0005840//ribosome	-	GO:0042254//ribosome biogenesis	gi|559373194|gb|AHB12488.1|/0/60S Ribosomal Protein LP0 [Pantala flavescens]
Btabaci_GLEAN_10009921	BTA003338.1,novel_T002328	305.73	535.9	244.47	259.92	565.56	822.94	684.42	678.53	-	-	ko03010//Ribosome	-	-	-	gi|121512030|gb|ABM55466.1|/3.45566e-63/ribosomal protein L35 [Xenopsylla cheopis]
CUFF11.365.1	BTA002581.1,novel_T001725	305.19	319.56	266.28	387.53	153.6	0	309.96	403.04	-	-	ko01100//Metabolic pathways;ko00500//Starch and sucrose metabolism;ko00052//Galactose metabolism	-	-	-	gi|646685191|gb|KDR03832.1|/3.41754e-151/Maltase 1, partial [Zootermopsis nevadensis]
Btabaci_GLEAN_10009644	BTA003799.1,novel_T002635	302.59	306.46	252.38	312.46	362.32	513.15	409.76	481.53	-	-	ko04141//Protein processing in endoplasmic reticulum	GO:0016020//membrane	-	-	gi|646706657|gb|KDR13764.1|/5.68518e-66/Protein lethal(2)essential for life [Zootermopsis nevadensis]
Btabaci_GLEAN_10019901	BTA015114.1	298.72	427.33	257.25	228.18	555.26	438.14	430.81	576.2	-	-	-	-	-	-	-
Btabaci_GLEAN_10001393	BTA020009.1,novel_T012113	298.55	275.44	318.88	298.85	282.97	360.65	312.07	330.79	-	-	-	-	-	-	gi|339896285|gb|AEK21828.1|/0/cytochrome P450 [Bemisia tabaci]
Btabaci_GLEAN_10011771	BTA000395.1	298.52	203.86	321.2	311.25	194.82	157.88	134.95	198.79	-	-	-	-	-	-	gi|817195432|ref|XP_012273251.1|/6.54663e-61/PREDICTED: uncharacterized protein LOC105695848 [Orussus abietinus]
Btabaci_GLEAN_10005368	BTA011110.1,novel_T006997,novel_T006998,novel_T006999,novel_T007000,novel_T007001	297.57	263.97	231.93	336.19	244.04	287.91	219.97	292.35	-	-	ko03013//RNA transport	-	-	-	gi|926650168|ref|XP_013791569.1|/7.00237e-12/PREDICTED: putative uncharacterized protein DDB_G0291608, partial [Limulus polyphemus]
Btabaci_GLEAN_10023854	BTA030121.1,novel_T018100,novel_T018101	295.81	806.48	9.71	41.56	358.11	374.72	765.44	771.06	-	-	ko05146//Amoebiasis;ko05110//Vibrio cholerae infection	-	-	-	gi|572268951|ref|XP_006612507.1|/4.46558e-25/PREDICTED: vegetative cell wall protein gp1-like [Apis dorsata]
Btabaci_GLEAN_10005006	BTA011776.1,novel_T007420,novel_T007421	295.32	206.58	317.79	314.57	241.04	222.05	241.66	255.16	-	-	ko04940//Type I diabetes mellitus	-	-	-	gi|985392457|ref|XP_015363525.1|/0/PREDICTED: receptor-type tyrosine-protein phosphatase N2 isoform X4 [Diuraphis noxia]
Btabaci_GLEAN_10025530	BTA018522.1,novel_T011267	294.58	372.58	240.51	223.55	406.35	484.58	438.78	497.14	-	-	-	-	-	-	-
Btabaci_GLEAN_10017871	BTA020342.1,novel_T012374	293.4	315.88	264.55	355.37	310.43	478.41	292.97	370.78	-	-	-	-	-	-	gi|646722099|gb|KDR23202.1|/2.35069e-94/Involucrin [Zootermopsis nevadensis]
Btabaci_GLEAN_10024323	BTA027611.2,novel_T016616,novel_T016617	293.14	431.35	238.72	230.19	578.05	661.96	561.65	630.11	-	-	ko05146//Amoebiasis;ko05110//Vibrio cholerae infection	-	-	-	gi|158296890|ref|XP_555219.3|/0/AGAP008244-PA [Anopheles gambiae str. PEST]
Btabaci_GLEAN_10025290	BTA020464.1,novel_T012458	292.37	290.59	270.46	269.94	363.35	613.01	401.98	525.36	-	-	ko03013//RNA transport	GO:0016021//integral component of membrane	GO:0003743//translation initiation factor activity	GO:0006413//translational initiation	gi|662225215|ref|XP_008486994.1|/1.37887e-68/PREDICTED: eukaryotic translation initiation factor 1A, X-chromosomal-like [Diaphorina citri]
Btabaci_GLEAN_10023646	BTA000972.1,novel_T000579	291.87	386.26	185.62	203.24	348.31	325.35	317.27	370.26	-	-	-	-	-	-	gi|751238079|ref|XP_011172968.1|/1.644e-16/PREDICTED: uncharacterized protein LOC105205316 [Solenopsis invicta]
Btabaci_GLEAN_10019265	BTA017136.1	291.34	392.43	232.07	266.35	332.35	336.35	269.58	291.07	-	-	ko01100//Metabolic pathways;ko05016//Huntington's disease;ko05010//Alzheimer's disease;ko05012//Parkinson's disease;ko00190//Oxidative phosphorylation;ko04932//Non-alcoholic fatty liver disease (NAFLD)	-	-	-	gi|646690477|gb|KDR06880.1|/1.45061e-37/NADH dehydrogenase [ubiquinone] 1 beta subcomplex subunit 8, mitochondrial [Zootermopsis nevadensis]
Btabaci_GLEAN_10026721	BTA027533.1,novel_T016554	289.46	445.74	199.54	213.88	507.99	587.78	583.3	551.51	-	-	ko03010//Ribosome	-	-	-	gi|383852459|ref|XP_003701744.1|/2.4023e-137/PREDICTED: 60S ribosomal protein L7a [Megachile rotundata]
Btabaci_GLEAN_10001328	BTA020171.1,novel_T012246,novel_T012247	289.27	439.32	212.56	193.99	444.12	535.68	535	501.87	-	-	-	-	-	-	gi|998507524|ref|XP_015514089.1|/1.75382e-177/PREDICTED: minor histocompatibility antigen H13 [Neodiprion lecontei]
CUFF76.110.2	BTA018067.1,novel_T011141	288.3	304.85	156.73	11.35	246.92	444.97	321.12	11.11	-	-	-	-	-	-	gi|194763873|ref|XP_001964057.1|/3.31454e-10/uncharacterized protein Dana_GF21357 [Drosophila ananassae]
Btabaci_GLEAN_10014167	BTA026987.1,novel_T016194	288	235.44	213.66	264.18	272.51	507.51	226.4	350.93	-	-	-	-	-	-	-
Btabaci_GLEAN_10015038	BTA025670.1,novel_T015351	286.71	259.56	283.48	315.7	269.33	429.09	269	385.18	-	-	ko05146//Amoebiasis;ko05110//Vibrio cholerae infection	-	-	-	gi|805818585|ref|XP_012149450.1|/7.50213e-09/PREDICTED: uncharacterized serine-rich protein C215.13-like [Megachile rotundata]
Btabaci_GLEAN_10026476	BTA003282.1,novel_T002285,novel_T002286,novel_T002287,novel_T002288,novel_T002289,novel_T002290,novel_T002291,novel_T002292,novel_T002293,novel_T002294,novel_T002295,novel_T002296	285.1	222.25	295.04	251.27	174.44	118.91	243.82	210.18	-	-	ko03013//RNA transport;ko03015//mRNA surveillance pathway	-	-	-	gi|662185164|ref|XP_008475669.1|/2.09869e-152/PREDICTED: cyclin-L2 [Diaphorina citri]
Btabaci_GLEAN_10019106	BTA017619.1,novel_T010904,novel_T010905,novel_T010906	282.17	302.94	282.8	246.34	317.2	284.1	282.67	300.74	-	-	-	-	-	-	gi|970892527|ref|XP_015111607.1|/0/PREDICTED: restin homolog isoform X2 [Diachasma alloeum]
Btabaci_GLEAN_10024877	BTA024068.1,novel_T014500	281.98	431.41	240.1	241.54	444.21	534.75	481.25	488.11	-	-	ko03010//Ribosome	GO:0005840//ribosome	GO:0003735//structural constituent of ribosome	GO:0006412//translation	gi|321454589|gb|EFX65754.1|/9.55634e-101/hypothetical protein DAPPUDRAFT_303528 [Daphnia pulex]
Btabaci_GLEAN_10025988	BTA011659.1,novel_T007361,novel_T007362,novel_T007363,novel_T007364	280.98	321.7	299.19	250.1	308.19	257.54	292.78	285.32	-	-	ko03410//Base excision repair	-	-	-	gi|985422249|ref|XP_015376552.1|/1.71669e-101/PREDICTED: high mobility group protein DSP1 [Diuraphis noxia]
Btabaci_GLEAN_10019005	BTA017826.1,novel_T011038	280.72	243.48	329.42	286.09	297.27	626.64	303.27	421.96	-	-	-	-	-	-	gi|549129986|dbj|BAO00941.1|/3.78605e-10/cardioacceleratory peptide 2b splicing variant b [Nilaparvata lugens]
Btabaci_GLEAN_10027220	BTA000034.1,novel_T000061,novel_T000062	279.75	450.95	209.12	230.87	453.82	573.77	570.21	527.24	-	-	ko03010//Ribosome	-	-	-	gi|345484799|ref|XP_003425125.1|/0/PREDICTED: ESF1 homolog [Nasonia vitripennis]
Btabaci_GLEAN_10023850	BTA030118.1,novel_T018093,novel_T018094,novel_T018095,novel_T018096,novel_T018097	279.32	202.21	331.78	340	205.37	165.21	170.6	193.89	-	-	-	-	-	-	gi|646716492|gb|KDR19730.1|/0/Exportin-7 [Zootermopsis nevadensis]
Btabaci_GLEAN_10012931	BTA028714.1,novel_T017169,novel_T017170,novel_T017171	279.06	312.51	215.09	219.86	271.85	233.3	230.58	210.49	-	-	-	-	-	-	gi|501294359|dbj|BAN20719.1|/1.40146e-88/conserved hypothetical protein [Riptortus pedestris]
Btabaci_GLEAN_10006242	BTA009562.1	278.79	292.75	203.95	186.3	259.18	330.35	253.54	284.95	-	-	ko01100//Metabolic pathways;ko05016//Huntington's disease;ko05010//Alzheimer's disease;ko05012//Parkinson's disease;ko00190//Oxidative phosphorylation;ko04932//Non-alcoholic fatty liver disease (NAFLD)	-	-	-	gi|939242753|ref|XP_014240657.1|/3.79192e-75/PREDICTED: probable NADH dehydrogenase [ubiquinone] 1 alpha subcomplex subunit 12 [Cimex lectularius]
Btabaci_GLEAN_10009639	BTA003794.1,novel_T002629,novel_T002631	278.3	150.03	252.65	314.29	303.06	251.75	241.59	358.48	-	-	ko04141//Protein processing in endoplasmic reticulum;ko05164//Influenza A	-	GO:0051082//unfolded protein binding	GO:0006457//protein folding	gi|478254019|gb|ENN74311.1|/0/hypothetical protein YQE_09282, partial [Dendroctonus ponderosae]
Btabaci_GLEAN_10021866	BTA007952.1,novel_T005116,novel_T005117	277.03	435.22	251.59	237.65	437.61	531.25	472.04	592.12	-	-	ko03010//Ribosome	-	-	-	gi|70909551|emb|CAJ17197.1|/6.93771e-123/ribosomal protein S3e [Scarabaeus laticollis]
Btabaci_GLEAN_10020157	BTA014208.1	276.47	275.41	164.69	167.56	292.39	300.45	182.24	211.94	-	-	ko01100//Metabolic pathways;ko05016//Huntington's disease;ko05010//Alzheimer's disease;ko05012//Parkinson's disease;ko00190//Oxidative phosphorylation;ko04932//Non-alcoholic fatty liver disease (NAFLD)	-	-	-	gi|512908093|ref|XP_004926598.1|/4.93979e-21/PREDICTED: cytochrome c oxidase subunit NDUFA4 [Bombyx mori]
Btabaci_GLEAN_10009954	BTA003208.1,novel_T002211,novel_T002212,novel_T002213	276.41	198.72	343.89	357.12	195.96	155.42	156.88	174.83	-	-	-	-	-	-	gi|939632344|ref|XP_014284604.1|/0/PREDICTED: thrombospondin type-1 domain-containing protein 7A-like [Halyomorpha halys]
Btabaci_GLEAN_10011874	BTA000234.1,novel_T000245,novel_T000246,novel_T000247	274.51	266.78	286.77	310.53	250.67	177.38	284.12	318.45	-	-	-	-	-	-	gi|646688772|gb|KDR06415.1|/1.54218e-127/hypothetical protein L798_04012, partial [Zootermopsis nevadensis]
CUFF97.603.1	BTA023755.1	274.29	242.9	210.23	224.98	407.01	374.84	305.48	408.01	-	-	ko05202//Transcriptional misregulation in cancer;ko03022//Basal transcription factors	-	-	-	gi|768442282|ref|XP_011562906.1|/5.22808e-28/PREDICTED: glycine-rich cell wall structural protein 1.8-like [Plutella xylostella]
Btabaci_GLEAN_10016165	BTA023640.2,novel_T014237,novel_T014238,novel_T014239,novel_T014240,novel_T014241	274.25	310.63	219	250.18	442.95	624.47	425.28	575.85	-	-	ko01100//Metabolic pathways;ko00860//Porphyrin and chlorophyll metabolism	-	-	-	gi|817059516|ref|XP_012251268.1|/1.22469e-109/PREDICTED: porphobilinogen deaminase [Athalia rosae]
Btabaci_GLEAN_10013749	BTA027670.1,novel_T016684	273.44	248.69	231.65	300.79	282.72	421.3	261.63	322.18	-	-	ko05014//Amyotrophic lateral sclerosis (ALS)	-	-	-	gi|357619158|gb|EHJ71838.1|/3.81554e-66/hypothetical protein KGM_17211 [Danaus plexippus]
Btabaci_GLEAN_10005820	BTA010254.1	271.86	153.67	418.81	253.15	106.47	119.5	58.06	106.41	-	-	ko04745//Phototransduction - fly	-	-	-	gi|972178577|ref|XP_015191376.1|/0/PREDICTED: arrestin homolog [Polistes dominula]
Btabaci_GLEAN_10021978	BTA007583.2,novel_T004854,novel_T004855,novel_T004856,novel_T004857,novel_T004858	270.52	249.04	240.4	305.97	256.63	404.56	237.01	322.02	-	-	-	-	-	-	gi|641672465|ref|XP_008185953.1|/0/PREDICTED: neuroendocrine convertase 1-like [Acyrthosiphon pisum]
Btabaci_GLEAN_10018264	BTA019288.1,novel_T011591,novel_T011592,novel_T011593	270.21	422.62	204.41	185.21	446	575.04	530.88	560.29	-	-	ko03010//Ribosome	-	GO:0008233//peptidase activity	-	gi|646705137|gb|KDR13016.1|/5.21913e-96/Metalloendopeptidase OMA1, mitochondrial [Zootermopsis nevadensis]
Btabaci_GLEAN_10025450	BTA019051.2,novel_T011453,novel_T011454,novel_T011455	270.16	337.67	303.77	305.21	313.29	403.95	300.9	345.91	-	-	ko00983//Drug metabolism - other enzymes	-	-	-	gi|157366840|gb|ABV45411.1|/0/COE2, partial [Bemisia tabaci]
Btabaci_GLEAN_10009489	BTA004044.2,novel_T002835,novel_T002836,novel_T002837	270.08	358.05	206.29	222.95	244.28	201.12	219.66	206.34	-	-	ko03013//RNA transport	GO:0005852//eukaryotic translation initiation factor 3 complex;GO:0016282//eukaryotic 43S preinitiation complex;GO:0033290//eukaryotic 48S preinitiation complex	GO:0003743//translation initiation factor activity	GO:0001731//formation of translation preinitiation complex;GO:0006446//regulation of translational initiation	gi|939669249|ref|XP_014281539.1|/0/PREDICTED: eukaryotic translation initiation factor 3 subunit A [Halyomorpha halys]
Btabaci_GLEAN_10025596	BTA017180.1,novel_T010704	269.2	238.88	253.92	299.96	236.34	437.84	204.06	292.98	-	-	ko00230//Purine metabolism;ko05169//Epstein-Barr virus infection;ko00240//Pyrimidine metabolism;ko03020//RNA polymerase;ko04623//Cytosolic DNA-sensing pathway	-	-	-	gi|951535455|ref|XP_014471248.1|/2.5707e-24/PREDICTED: titin-like [Dinoponera quadriceps]
Btabaci_GLEAN_10009763	BTA003587.1,novel_T002497	269.02	426.26	180.42	200.46	429.04	539.77	502.93	496.61	-	-	ko03010//Ribosome	GO:0005840//ribosome	-	-	gi|112982844|ref|NP_001037135.1|/8.15044e-125/ribosomal protein L7 [Bombyx mori]
Btabaci_GLEAN_10022332	BTA006371.1,novel_T004027	268.42	383.35	224.28	211.88	294.47	433.06	419.91	254.58	-	-	ko03010//Ribosome	-	-	-	gi|662196470|ref|XP_008471266.1|/3.06575e-32/PREDICTED: 60S ribosomal protein L14 [Diaphorina citri]
Btabaci_GLEAN_10022310	BTA006454.1,novel_T004103	267.91	274.57	271.51	292.26	387.51	421.94	524.09	546.63	-	-	ko04910//Insulin signaling pathway;ko04010//MAPK signaling pathway;ko04066//HIF-1 signaling pathway	-	-	-	gi|646716811|gb|KDR19897.1|/0/MAP kinase-interacting serine/threonine-protein kinase 1 [Zootermopsis nevadensis]
Btabaci_GLEAN_10026469	BTA003274.4,novel_T002280,novel_T002281,novel_T002282	267.23	316.18	253.48	248.54	288.16	296.2	250.06	286.73	-	-	-	GO:0043227//membrane-bounded organelle	GO:0016491//oxidoreductase activity	-	gi|339896229|gb|AEK21800.1|/0/cytochrome P450 [Bemisia tabaci]
Btabaci_GLEAN_10016733	BTA022683.1	267.22	218.32	204.41	246.62	277.95	390.26	246.64	312.96	-	-	ko05146//Amoebiasis;ko05169//Epstein-Barr virus infection;ko04810//Regulation of actin cytoskeleton;ko05200//Pathways in cancer;ko05205//Proteoglycans in cancer;ko04015//Rap1 signaling pathway;ko05100//Bacterial invasion of epithelial cells;ko04151//PI3K-Akt signaling pathway;ko04919//Thyroid hormone signaling pathway;ko04510//Focal adhesion;ko04145//Phagosome;ko05131//Shigellosis;ko05206//MicroR…	-	-	-	gi|766922778|ref|XP_011505979.1|/2.31832e-11/PREDICTED: ATP-dependent helicase brm-like isoform X2 [Ceratosolen solmsi marchali]
CUFF109.726.1	BTA026805.1,novel_T016091	267.19	443.74	251.84	216.15	451.54	682.12	472.91	525.95	-	-	ko03010//Ribosome	GO:0005840//ribosome	GO:0003735//structural constituent of ribosome;GO:0019843//rRNA binding;GO:0046872//metal ion binding	GO:0006412//translation	gi|149287110|gb|ABR23454.1|/1.70306e-12/60S ribosomal protein L37 [Ornithodoros parkeri]
Btabaci_GLEAN_10018629	BTA018566.1,novel_T011290,novel_T011291,novel_T011292,novel_T011293,novel_T011294,novel_T011295,novel_T011296	266.57	202.55	324.34	312.89	217.96	196.8	210.98	218.84	-	-	ko04320//Dorso-ventral axis formation	-	-	-	gi|328721104|ref|XP_001944324.2|/8.26681e-18/PREDICTED: enolase-phosphatase E1-like isoform X1 [Acyrthosiphon pisum]
Btabaci_GLEAN_10012291	BTA029777.1,novel_T017986	266.23	413.2	174.38	166.19	446.08	590.94	542.53	568.42	-	-	ko01100//Metabolic pathways;ko00563//Glycosylphosphatidylinositol(GPI)-anchor biosynthesis	-	-	-	gi|645022842|ref|XP_008217584.1|/0/PREDICTED: N-acetylglucosaminyl-phosphatidylinositol biosynthetic protein [Nasonia vitripennis]
Btabaci_GLEAN_10017179	BTA021866.1,novel_T013428	266.15	348.45	248.22	245.42	298.99	352.04	272.06	328.64	-	-	ko01100//Metabolic pathways;ko05016//Huntington's disease;ko05010//Alzheimer's disease;ko05012//Parkinson's disease;ko00190//Oxidative phosphorylation;ko04932//Non-alcoholic fatty liver disease (NAFLD);ko04260//Cardiac muscle contraction	-	-	-	gi|700894661|gb|AIU99749.1|/6.97091e-41/mitochondrial cytochrome c oxidase subunit VIb [Litopenaeus vannamei]
CUFF13.374.1	BTA003196.1	263.3	391.88	211.99	172.11	593.34	638.7	605.83	684.28	-	-	-	-	-	-	-
Btabaci_GLEAN_10019585	BTA016180.1,novel_T010123	262.2	305.84	192.41	190.84	250.03	307.59	233.81	262.67	-	-	ko01100//Metabolic pathways;ko05016//Huntington's disease;ko05010//Alzheimer's disease;ko05012//Parkinson's disease;ko00190//Oxidative phosphorylation	GO:0005743//mitochondrial inner membrane	-	GO:0015992//proton transport	gi|939662841|ref|XP_014297522.1|/3.68398e-28/PREDICTED: ATP synthase-coupling factor 6, mitochondrial [Microplitis demolitor]
Btabaci_GLEAN_10027145	BTA009026.1,novel_T005699	262.12	140.81	279.66	328.48	117.08	26.29	9.88	5.29	-	-	ko04810//Regulation of actin cytoskeleton;ko04666//Fc gamma R-mediated phagocytosis;ko05100//Bacterial invasion of epithelial cells;ko05131//Shigellosis;ko04520//Adherens junction;ko05231//Choline metabolism in cancer;ko05132//Salmonella infection	-	-	-	gi|549130038|dbj|BAO00967.1|/1.06369e-37/neuropeptide like precursor 3-like [Nilaparvata lugens]
Btabaci_GLEAN_10026875	BTA024621.1,novel_T014777	261.84	220.56	253.1	271.09	257.38	346.69	253.96	307.84	-	-	-	-	-	-	gi|817060053|ref|XP_012251561.1|/1.08074e-102/PREDICTED: probable Bax inhibitor 1 [Athalia rosae]
Btabaci_GLEAN_10005296	BTA011235.1,novel_T007080	261.47	228.58	329.74	280.35	287.76	294.65	228.7	304.16	-	-	ko01100//Metabolic pathways;ko00520//Amino sugar and nucleotide sugar metabolism	-	-	-	gi|939264448|ref|XP_014252225.1|/4.01377e-74/PREDICTED: peritrophin-1-like [Cimex lectularius]
Btabaci_GLEAN_10004125	BTA013459.1,novel_T008499,novel_T008500,novel_T008501	261.4	299.74	258.94	251.56	295.2	319.58	283.01	275.26	-	-	ko04141//Protein processing in endoplasmic reticulum	-	-	-	gi|646700577|gb|KDR10687.1|/5.49349e-71/Nucleotide exchange factor SIL1 [Zootermopsis nevadensis]
Btabaci_GLEAN_10015985	BTA023981.1	261	363.89	210.03	235.38	420.05	617.06	509.83	519.38	-	-	ko03010//Ribosome	GO:0005840//ribosome	GO:0003735//structural constituent of ribosome	GO:0006412//translation	gi|559373073|gb|AHB12478.1|/3.04102e-60/60S Ribosomal Protein L31 [Pantala flavescens]
Btabaci_GLEAN_10004657	BTA012427.1,novel_T007774	259.19	318.18	163.11	175.4	224.87	234.64	191.95	231.49	-	-	ko01100//Metabolic pathways;ko05016//Huntington's disease;ko05010//Alzheimer's disease;ko05012//Parkinson's disease;ko00190//Oxidative phosphorylation	-	-	-	gi|90819982|gb|ABD98749.1|/1.05218e-85/putative ATP synthase oligomycin sensitivity conferral protein [Graphocephala atropunctata]
Btabaci_GLEAN_10014794	BTA026064.2,novel_T015569	258.84	287.75	235.21	232.71	288.82	323.46	222.82	243.98	-	-	-	-	-	-	gi|795030430|ref|XP_011863278.1|/1.55143e-76/PREDICTED: iron-sulfur cluster assembly enzyme ISCU, mitochondrial-like [Vollenhovia emeryi]
Btabaci_GLEAN_10013754	BTA027664.1,novel_T016675,novel_T016676	257.5	402.17	214.53	220.04	421.23	558.45	476.67	472	-	-	ko03008//Ribosome biogenesis in eukaryotes	-	-	-	gi|662209025|ref|XP_008478095.1|/7.66258e-123/PREDICTED: eukaryotic translation initiation factor 6 [Diaphorina citri]
Btabaci_GLEAN_10019750	BTA015601.1,novel_T009809,novel_T009810	255.95	239.88	231.21	215.71	186.32	135.37	166.41	151.25	-	-	-	-	-	-	gi|646714522|gb|KDR18452.1|/3.69369e-45/hypothetical protein L798_07455 [Zootermopsis nevadensis]
Btabaci_GLEAN_10011128	BTA001376.1,novel_T000838	255.48	346.73	159.06	176.42	374.63	506.76	431.03	457.07	-	-	ko03010//Ribosome	GO:0005840//ribosome	GO:0003735//structural constituent of ribosome	GO:0006412//translation	gi|663070921|ref|NP_001284611.1|/4.36913e-54/60S ribosomal protein L27 [Diaphorina citri]
Btabaci_GLEAN_10008208	BTA006123.1,novel_T003941	255.47	192.17	316.4	297.77	200.62	152.79	198.98	202	-	-	-	-	-	-	gi|939667007|ref|XP_014280640.1|/2.27494e-27/PREDICTED: cell wall protein DAN4-like [Halyomorpha halys]
Btabaci_GLEAN_10009619	BTA003854.1	254	287.06	203.36	192.47	237.51	281.48	195.86	243.61	-	-	ko01100//Metabolic pathways;ko05016//Huntington's disease;ko05010//Alzheimer's disease;ko05012//Parkinson's disease;ko00190//Oxidative phosphorylation;ko04932//Non-alcoholic fatty liver disease (NAFLD)	-	-	-	gi|557765499|ref|XP_005182449.1|/2.3465e-44/PREDICTED: NADH dehydrogenase [ubiquinone] 1 beta subcomplex subunit 9 [Musca domestica]
Btabaci_GLEAN_10025670	BTA016336.1,novel_T010252	253.92	202.31	331.33	304.57	215.36	270.39	191.5	251.63	-	-	ko05202//Transcriptional misregulation in cancer;ko05034//Alcoholism;ko05322//Systemic lupus erythematosus	GO:0000786//nucleosome;GO:0005634//nucleus;GO:0005700//polytene chromosome	GO:0003677//DNA binding;GO:0008270//zinc ion binding;GO:0046982//protein heterodimerization activity	GO:0007140//male meiosis;GO:0007155//cell adhesion;GO:0008360//regulation of cell shape	gi|506965510|gb|AGM32107.1|/1.37935e-57/histone H3.3 [Coptotermes formosanus]
Btabaci_GLEAN_10019783	BTA015442.1	253.22	337.05	193.18	176.76	219.45	130.59	188.76	179.86	-	-	ko01100//Metabolic pathways;ko01200//Carbon metabolism;ko00020//Citrate cycle (TCA cycle);ko00640//Propanoate metabolism	-	GO:0016874//ligase activity;GO:0048037//cofactor binding	GO:0008152//metabolic process	gi|662193280|ref|XP_008469540.1|/0/PREDICTED: succinyl-CoA ligase subunit alpha, mitochondrial [Diaphorina citri]
Btabaci_GLEAN_10016017	BTA023920.3,novel_T014418,novel_T014419,novel_T014420	253.01	333.3	189.89	190.18	310.17	304.56	377.35	399.51	-	-	-	-	-	-	gi|646701976|gb|KDR11443.1|/5.79175e-157/SET and MYND domain-containing protein 4 [Zootermopsis nevadensis]
Btabaci_GLEAN_10001852	BTA018594.1	252.97	247.12	177.17	173.17	205.59	269.89	200.62	244.58	-	-	ko01100//Metabolic pathways;ko05016//Huntington's disease;ko05010//Alzheimer's disease;ko05012//Parkinson's disease;ko00190//Oxidative phosphorylation;ko04932//Non-alcoholic fatty liver disease (NAFLD)	-	-	-	gi|498984329|ref|XP_004530337.1|/3.9954e-56/PREDICTED: NADH dehydrogenase [ubiquinone] 1 beta subcomplex subunit 10 [Ceratitis capitata]
Btabaci_GLEAN_10005299	BTA011231.1,novel_T007075	252.77	252.65	232.1	213.88	209.05	116.92	180.99	185.84	-	-	ko01100//Metabolic pathways;ko00230//Purine metabolism;ko05169//Epstein-Barr virus infection;ko05016//Huntington's disease;ko00240//Pyrimidine metabolism;ko05168//Herpes simplex infection;ko03020//RNA polymerase	-	-	-	gi|985389618|ref|XP_015379421.1|/6.58351e-53/PREDICTED: uncharacterized protein LOC107173407 [Diuraphis noxia]
Btabaci_GLEAN_10010046	BTA003093.2,novel_T002087	249.8	681.74	179.97	199.82	628.08	614.4	1052.1	854.84	-	-	ko05146//Amoebiasis;ko05110//Vibrio cholerae infection	-	-	-	gi|780613911|ref|XP_011691231.1|/4.75965e-12/PREDICTED: uncharacterized protein DDB_G0271670-like isoform X2 [Wasmannia auropunctata]
Btabaci_GLEAN_10020805	BTA012067.1,novel_T007573,novel_T007574,novel_T007575,novel_T007576,novel_T007577	247.48	437.07	204.96	221.42	443.5	604.03	547.55	553.34	-	-	ko03010//Ribosome	-	-	-	gi|939689652|ref|XP_014288772.1|/4.11574e-82/PREDICTED: uncharacterized protein LOC106688707 [Halyomorpha halys]
Btabaci_GLEAN_10011802	BTA000362.1	246.8	429.9	188.39	208.34	434.62	445.98	557.67	474.17	-	-	ko03010//Ribosome	-	-	-	gi|817211013|ref|XP_012281621.1|/0/PREDICTED: 60S ribosomal protein L4 [Orussus abietinus]
Btabaci_GLEAN_10006516	BTA008975.1,novel_T005671	246.69	344.86	159.07	179.61	343.73	424.96	451.23	436.61	-	-	ko03010//Ribosome	-	-	-	gi|939249271|ref|XP_014244155.1|/2.26341e-50/PREDICTED: 60S ribosomal protein L35a [Cimex lectularius]
Btabaci_GLEAN_10023096	BTA003162.1,novel_T002162,novel_T002163,novel_T002164	246.52	319.11	189.96	199.82	311.28	487.71	386.06	431.13	-	-	ko03010//Ribosome	-	-	-	gi|646692827|gb|KDR07538.1|/3.25225e-73/hypothetical protein L798_02918, partial [Zootermopsis nevadensis]
Btabaci_GLEAN_10015945	BTA024079.1,novel_T014506	246.29	273.69	233.83	214.04	243.99	119.22	184.74	174.35	-	-	ko04144//Endocytosis	-	-	-	gi|939270344|ref|XP_014255390.1|/0/PREDICTED: sarcalumenin isoform X2 [Cimex lectularius]
Btabaci_GLEAN_10019695	BTA015753.1,novel_T009903,novel_T009904	246.18	408.23	192.13	185.35	402.88	472.09	470.08	510.07	-	-	ko03010//Ribosome	-	-	-	gi|939262054|ref|XP_014250941.1|/1.52842e-149/PREDICTED: 60S ribosomal protein L5 [Cimex lectularius]
Btabaci_GLEAN_10018920	BTA018044.1,novel_T011127,novel_T011128	245.71	324.68	183.17	163.74	232.58	212.77	205.41	202.36	-	-	-	-	-	-	gi|817060966|ref|XP_012252065.1|/1.93268e-152/PREDICTED: rac GTPase-activating protein 1-like [Athalia rosae]
Btabaci_GLEAN_10017433	BTA021279.1,novel_T012998	244.89	308.9	237.89	236.04	345.85	240.91	356.1	342.11	-	-	ko01100//Metabolic pathways;ko00330//Arginine and proline metabolism;ko00480//Glutathione metabolism	-	-	-	gi|642928069|ref|XP_968571.3|/0/PREDICTED: ornithine decarboxylase 1 [Tribolium castaneum]
Btabaci_GLEAN_10010498	BTA002296.1,novel_T001496,novel_T001497,novel_T001498,novel_T001499,novel_T001500,novel_T001501,novel_T001502,novel_T001503,novel_T001504,novel_T001505	243.27	359.16	151.37	174.42	422.3	471.15	438.48	497.7	-	-	ko04142//Lysosome	-	-	-	gi|939656549|ref|XP_014276641.1|/0/PREDICTED: AP-3 complex subunit beta-1 [Halyomorpha halys]
CUFF24.459.1	BTA005593.1	242.94	214.77	212.97	242.33	192.1	347.81	174.15	269.26	-	-	ko04142//Lysosome;ko05205//Proteoglycans in cancer;ko04145//Phagosome;ko04612//Antigen processing and presentation;ko05323//Rheumatoid arthritis	-	-	-	gi|283046734|ref|NP_001164314.1|/7.50126e-47/cathepsin L precursor [Tribolium castaneum]
Btabaci_GLEAN_10020015	BTA014622.1	242.1	337.69	183.78	160.41	396.59	324.97	432.3	366.2	-	-	ko01100//Metabolic pathways;ko00520//Amino sugar and nucleotide sugar metabolism	-	-	-	gi|939659002|ref|XP_014277588.1|/4.09083e-146/PREDICTED: chitinase-like protein EN03 isoform X3 [Halyomorpha halys]
Btabaci_GLEAN_10012126	BTA029953.2,novel_T018019,novel_T018020	242.02	227.92	249.17	234.41	272.35	419.14	263.73	357.11	-	-	ko01100//Metabolic pathways;ko04972//Pancreatic secretion;ko00561//Glycerolipid metabolism;ko04975//Fat digestion and absorption	-	-	-	gi|641662733|ref|XP_008182372.1|/9.11027e-104/PREDICTED: inactive pancreatic lipase-related protein 1-like isoform X2 [Acyrthosiphon pisum]
Btabaci_GLEAN_10016431	BTA023229.1,novel_T014134,novel_T014135	241.83	352.14	183.62	274.04	458.37	541.6	225.96	728.69	-	-	ko04810//Regulation of actin cytoskeleton;ko04510//Focal adhesion;ko04611//Platelet activation;ko04022//cGMP-PKG signaling pathway;ko04020//Calcium signaling pathway;ko04270//Vascular smooth muscle contraction;ko04921//Oxytocin signaling pathway;ko04971//Gastric acid secretion	-	-	-	gi|1008441369|ref|XP_015836060.1|/1.6554e-10/PREDICTED: UPF0430 protein CG31712 [Tribolium castaneum]
Btabaci_GLEAN_10017981	BTA020154.1,novel_T012236,novel_T012237,novel_T012238,novel_T012239,novel_T012240	241.51	337.04	211.49	232.06	336.46	332.98	412.34	364.41	-	-	ko03013//RNA transport	-	-	-	gi|501295416|dbj|BAN20868.1|/0/eukaryotic initiation factor 4a [Riptortus pedestris]
Btabaci_GLEAN_10013968	BTA027233.1,novel_T016362	240.3	148.91	337.44	303.33	154.85	191.65	135.15	181.09	-	-	-	-	-	-	gi|71534702|emb|CAI26307.1|/0/beta-alanyl conjugating enzyme [Periplaneta americana]
Btabaci_GLEAN_10018123	BTA019762.1,novel_T011905	238.34	315.99	263.23	309.43	310.25	391.95	261.5	318.48	-	-	-	-	-	-	gi|506968437|gb|AGM32562.1|/8.49595e-21/hypothetical protein [Coptotermes formosanus]
Btabaci_GLEAN_10014727	BTA026168.1,novel_T015620	237.28	235.96	222.88	199.66	231.59	186.93	250.39	241.28	-	-	ko01100//Metabolic pathways;ko01212//Fatty acid metabolism;ko00071//Fatty acid degradation	-	-	-	gi|646710773|gb|KDR16191.1|/0/Very long-chain specific acyl-CoA dehydrogenase, mitochondrial [Zootermopsis nevadensis]
CUFF9.131.1	BTA002116.1,novel_T001386,novel_T001387	236.65	230.24	220.22	216.23	254.85	197.37	221.85	219.25	-	-	-	-	-	-	-
Btabaci_GLEAN_10027231	BTA000046.1,novel_T000082,novel_T000083	236.35	318.22	145.88	150.01	210.82	231.65	205.74	195.41	-	-	ko01100//Metabolic pathways;ko05016//Huntington's disease;ko05010//Alzheimer's disease;ko05012//Parkinson's disease;ko00190//Oxidative phosphorylation;ko04932//Non-alcoholic fatty liver disease (NAFLD)	-	-	GO:0006633//fatty acid biosynthetic process	gi|282721114|ref|NP_001164229.1|/1.77316e-52/mitochondrial acyl carrier protein 1 isoform A [Tribolium castaneum]
Btabaci_GLEAN_10009588	BTA003889.1,novel_T002731	236.29	244.86	215.73	215.34	248.99	222.39	240.29	255.18	-	-	-	-	-	-	gi|568259004|gb|ETN67021.1|/7.00109e-20/growth and transformation-dependent protein [Anopheles darlingi]
Btabaci_GLEAN_10019893	BTA015107.1,novel_T009473,novel_T009474	236.24	181.12	338.72	317.61	227.38	271.3	217.57	276.53	-	-	ko01100//Metabolic pathways;ko00270//Cysteine and methionine metabolism	-	-	-	gi|91078850|ref|XP_971848.1|/6.2387e-153/PREDICTED: uncharacterized protein LOC660531 [Tribolium castaneum]
Btabaci_GLEAN_10022047	BTA007362.1	234.6	382.51	167.44	202.1	422.07	441.68	534.57	490	-	-	ko05134//Legionellosis	-	GO:0003746//translation elongation factor activity	GO:0006414//translational elongation	gi|119164|sp|P12261.3|EF1G_ARTSA/0/RecName: Full=Elongation factor 1-gamma; Short=EF-1-gamma; AltName: Full=eEF-1B gamma
CUFF92.336.1	BTA022081.1,novel_T013538	233.89	230.68	257	201.4	285.75	401.19	289.95	338.94	-	-	-	-	-	-	gi|985414985|ref|XP_015372891.1|/4.58952e-12/PREDICTED: uncharacterized protein LOC107168107 [Diuraphis noxia]
Btabaci_GLEAN_10016173	BTA023625.3,novel_T014221,novel_T014222,novel_T014223	233.81	198.91	318.03	265.71	234.43	276.64	214.62	278.5	-	-	-	-	-	-	gi|939632344|ref|XP_014284604.1|/0/PREDICTED: thrombospondin type-1 domain-containing protein 7A-like [Halyomorpha halys]
CUFF23.286.1	BTA005344.1	233.14	120.85	243	304.03	93.76	23.67	6.74	2.44	-	-	ko05146//Amoebiasis;ko05110//Vibrio cholerae infection;ko05200//Pathways in cancer;ko04015//Rap1 signaling pathway;ko04611//Platelet activation;ko04024//cAMP signaling pathway;ko05414//Dilated cardiomyopathy;ko04072//Phospholipase D signaling pathway;ko05034//Alcoholism;ko04020//Calcium signaling pathway;ko04976//Bile secretion;ko04724//Glutamatergic synapse;ko04970//Salivary secretion;ko04726//S…	-	-	-	gi|768446587|ref|XP_011565238.1|/1.4999e-26/PREDICTED: calphotin-like [Plutella xylostella]
Btabaci_GLEAN_10025884	BTA013252.1,novel_T008322,novel_T008323	232.45	192.02	181.24	152.67	180.25	91.85	143.6	122.25	-	-	ko01100//Metabolic pathways;ko01230//Biosynthesis of amino acids;ko00330//Arginine and proline metabolism	GO:0005737//cytoplasm;GO:0016021//integral component of membrane	GO:0004349//glutamate 5-kinase activity;GO:0004350//glutamate-5-semialdehyde dehydrogenase activity	GO:0006561//proline biosynthetic process;GO:0016310//phosphorylation;GO:0055114//oxidation-reduction process	gi|952520286|gb|KRT80713.1|/0/hypothetical protein AMK59_6148 [Oryctes borbonicus]
Btabaci_GLEAN_10006945	BTA008244.1	230.07	397.88	161.79	196.87	403.07	489.21	483.95	467.67	-	-	ko03010//Ribosome	GO:0005840//ribosome	GO:0003735//structural constituent of ribosome	GO:0006412//translation	gi|189240524|ref|XP_971875.2|/3.16657e-130/PREDICTED: 60S ribosomal protein L3 [Tribolium castaneum]
Btabaci_GLEAN_10015324	BTA025221.1,novel_T015126,novel_T015127	229.79	337.86	162.66	192.16	301.76	286.72	384.14	326.92	-	-	-	-	-	-	gi|646722932|gb|KDR23726.1|/0/Tubby protein-like protein [Zootermopsis nevadensis]
Btabaci_GLEAN_10025618	BTA016717.1,novel_T010432	228.93	279.19	224.71	212.24	276.7	301.45	324.65	321.18	-	-	ko04145//Phagosome;ko05130//Pathogenic Escherichia coli infection;ko04540//Gap junction	-	-	-	gi|930662959|gb|KPJ04585.1|/0/Tubulin alpha chain [Papilio xuthus]
Btabaci_GLEAN_10020469	BTA013203.1	226.26	159.87	270.27	257.41	184.56	127.49	168.39	188.26	-	-	ko04721//Synaptic vesicle cycle	GO:0016020//membrane	-	-	gi|939263903|ref|XP_014251933.1|/0/PREDICTED: synaptotagmin-4 isoform X3 [Cimex lectularius]
Btabaci_GLEAN_10007001	BTA008159.1,novel_T005304	226.23	282.19	183.7	179.05	213.91	237.77	219.28	240.4	-	-	ko01100//Metabolic pathways;ko05016//Huntington's disease;ko05010//Alzheimer's disease;ko05012//Parkinson's disease;ko00190//Oxidative phosphorylation;ko04932//Non-alcoholic fatty liver disease (NAFLD)	-	-	GO:0006810//transport	gi|768411035|ref|XP_011561535.1|/2.34049e-48/PREDICTED: uncharacterized protein LOC105391704 [Plutella xylostella]
Btabaci_GLEAN_10022107	BTA007298.1	225.09	348.32	174.92	170.2	345.56	447.64	461.18	421.15	-	-	ko03010//Ribosome	-	-	-	gi|646697936|gb|KDR09351.1|/1.10362e-105/60S ribosomal protein L23a [Zootermopsis nevadensis]
Btabaci_GLEAN_10014358	BTA026734.1,novel_T016022,novel_T016023,novel_T016024,novel_T016025,novel_T016026	224.23	313.04	164.51	164.98	240.78	79.86	200.29	188	-	-	ko00564//Glycerophospholipid metabolism	-	-	-	gi|915658477|gb|KOC61599.1|/0/Glycerol-3-phosphate dehydrogenase, mitochondrial [Habropoda laboriosa]
Btabaci_GLEAN_10014104	BTA027079.1,novel_T016294	223.48	257.65	189.27	167.94	324.09	279.65	282.62	271.74	-	-	ko04142//Lysosome;ko04978//Mineral absorption	-	-	-	gi|506968367|gb|AGM32527.1|/3.35444e-39/hemolymph juvenile hormone binding protein (JHBP) [Coptotermes formosanus]
Btabaci_GLEAN_10006472	BTA009154.1,novel_T005799,novel_T005800,novel_T005801	222.32	261.94	207.45	201.85	326.04	349.49	329.81	345.24	-	-	-	-	-	-	gi|817087542|ref|XP_012266552.1|/7.59775e-17/PREDICTED: icarapin-like [Athalia rosae]
Btabaci_GLEAN_10027026	BTA019457.2,novel_T011731,novel_T011732	221.44	341.01	142.89	180.34	350.22	435.7	420.87	428.87	-	-	ko01100//Metabolic pathways;ko00240//Pyrimidine metabolism;ko00670//One carbon pool by folate	-	GO:0004799//thymidylate synthase activity	GO:0006231//dTMP biosynthetic process;GO:0032259//methylation	gi|240129500|gb|ACS44779.1|/1.10765e-167/thymidylate synthase [Litopenaeus vannamei]
Btabaci_GLEAN_10026577	BTA001311.1,novel_T000779,novel_T000780	221.27	343.87	151.87	135.85	348.77	452.93	446.54	419.48	-	-	ko03010//Ribosome	-	-	-	gi|357627868|gb|EHJ77408.1|/8.95412e-101/40S ribosomal protein S11 [Danaus plexippus]
Btabaci_GLEAN_10022036	BTA007435.1,novel_T004802,novel_T004803	220.86	388.51	187.82	172.81	389.91	462.03	454.96	421.12	-	-	-	GO:0005634//nucleus	-	-	gi|665807287|ref|XP_008551913.1|/0/PREDICTED: probable histone-binding protein Caf1 [Microplitis demolitor]
Btabaci_GLEAN_10006435	BTA009224.1,novel_T005879,novel_T005880	220.76	347.39	128.5	126.12	235.13	153.2	190.06	158.64	-	-	ko00564//Glycerophospholipid metabolism	-	-	-	gi|1004402696|gb|EEZ98249.2|/3.47822e-118/Glycerol-3-phosphate dehydrogenase [NAD(+)], cytoplasmic-like Protein [Tribolium castaneum]
Btabaci_GLEAN_10022822	BTA004301.1,novel_T002967,novel_T002968,novel_T002969	220.5	285.85	177.29	208.82	250.45	385.3	322.03	312.04	-	-	-	-	-	-	gi|494621164|gb|AGL39457.1|/2.77584e-146/alpha NAC [Bemisia tabaci]
Btabaci_GLEAN_10015523	BTA024868.1,novel_T014939	219.94	269.71	208.65	191.68	272.62	334.05	292.34	307.49	-	-	-	-	-	-	gi|90819972|gb|ABD98743.1|/3.58407e-48/thioredoxin-like protein [Graphocephala atropunctata]
Btabaci_GLEAN_10010020	BTA003125.1,novel_T002130	219.81	163.25	214.62	244.69	207.6	142.69	212.98	210.08	-	-	ko04152//AMPK signaling pathway;ko04066//HIF-1 signaling pathway;ko00051//Fructose and mannose metabolism	-	-	-	gi|193697719|ref|XP_001944498.1|/0/PREDICTED: 6-phosphofructo-2-kinase/fructose-2,6-bisphosphatase-like [Acyrthosiphon pisum]
Btabaci_GLEAN_10003884	BTA013962.1,novel_T008823	219.75	193.9	184.69	228.31	191.82	254.07	205.11	185.28	-	-	ko03013//RNA transport	GO:0016021//integral component of membrane	GO:0003743//translation initiation factor activity	GO:0006413//translational initiation	gi|646715254|gb|KDR18925.1|/4.97507e-98/Eukaryotic translation initiation factor 1A, X-chromosomal [Zootermopsis nevadensis]
Btabaci_GLEAN_10004766	BTA012208.1	218.92	347.9	147.61	177.95	379.59	492.59	453.17	450.6	-	-	ko05162//Measles	-	-	-	gi|646714091|gb|KDR18184.1|/0/Guanine nucleotide-binding protein subunit beta-like protein [Zootermopsis nevadensis]
Btabaci_GLEAN_10017690	BTA020834.1,novel_T012695,novel_T012696,novel_T012697,novel_T012698	218.69	234.37	197.41	173.01	188.37	136.59	185.07	145.89	-	-	ko04380//Osteoclast differentiation	-	-	-	gi|998516869|ref|XP_015519241.1|/1.78618e-125/PREDICTED: four and a half LIM domains protein 2 isoform X5 [Neodiprion lecontei]
Btabaci_GLEAN_10013301	BTA028222.1,novel_T016891	218.4	204.25	217.57	227.22	192.53	201.52	139.23	169.82	-	-	ko04120//Ubiquitin mediated proteolysis	-	-	-	gi|910344164|ref|XP_013175891.1|/1.53104e-148/PREDICTED: Williams-Beuren syndrome chromosomal region 16 protein-like [Papilio xuthus]
Btabaci_GLEAN_10017205	BTA021773.1	218.32	252.2	244.91	232.47	286.62	269.61	291.37	291.2	-	-	ko04612//Antigen processing and presentation	-	-	-	gi|240848899|ref|NP_001155577.1|/3.68383e-49/gamma-interferon-inducible lysosomal thiol reductase-like precursor [Acyrthosiphon pisum]
Btabaci_GLEAN_10015312	BTA025234.1,novel_T015134,novel_T015135,novel_T015136	217.46	333.4	212.06	198.22	315.59	297.59	345.06	323.33	-	-	ko04320//Dorso-ventral axis formation	-	-	-	gi|501291462|dbj|BAN20365.1|/1.0507e-143/heterogeneous nuclear ribonucleoprotein [Riptortus pedestris]
Btabaci_GLEAN_10026845	BTA024588.1,novel_T014734,novel_T014735,novel_T014736,novel_T014737	215.74	166.22	255.34	251.31	165.27	173.98	145.64	168.84	-	-	ko04745//Phototransduction - fly	-	-	-	gi|662188955|ref|XP_008488175.1|/1.9652e-42/PREDICTED: uncharacterized protein LOC103524910, partial [Diaphorina citri]
Btabaci_GLEAN_10019897	BTA015112.1	214.67	193.16	174.95	209.75	233.26	456.95	202.97	327.18	-	-	-	-	-	-	gi|662187959|ref|XP_008487632.1|/1.2801e-12/PREDICTED: uncharacterized protein LOC103524398 [Diaphorina citri]
Btabaci_GLEAN_10020484	BTA013151.1	214.42	330.51	153.53	160.93	322.04	267.55	315.2	261.34	-	-	-	-	-	-	gi|662206912|ref|XP_008476932.1|/2.10128e-154/PREDICTED: mitochondrial uncoupling protein 2-like [Diaphorina citri]
Btabaci_GLEAN_10024017	BTA029391.1,novel_T017687,novel_T017688	213.94	199.34	197.44	204.68	184.02	167.49	183.14	215.84	-	-	-	-	-	-	gi|936562674|ref|XP_014215271.1|/5.33001e-156/PREDICTED: annexin B9 isoform X2 [Copidosoma floridanum]
Btabaci_GLEAN_10022569	BTA005352.1	213.89	349.61	134.21	184.2	369.01	453.91	443.33	474.66	-	-	ko03010//Ribosome	GO:0022627//cytosolic small ribosomal subunit	GO:0003735//structural constituent of ribosome;GO:0019843//rRNA binding	GO:0045903//positive regulation of translational fidelity	gi|242020437|ref|XP_002430661.1|/1.82154e-115/40S ribosomal protein S9, putative [Pediculus humanus corporis]
Btabaci_GLEAN_10017497	BTA021209.1,novel_T012968,novel_T012969,novel_T012970	213.61	228.16	177.05	176.02	227.06	132.41	213.81	193.61	-	-	ko04380//Osteoclast differentiation	-	-	-	gi|914552702|gb|KOB64354.1|/9.59595e-103/putative four and a half lim domains-containing protein [Operophtera brumata]
Btabaci_GLEAN_10017739	BTA020653.2,novel_T012567,novel_T012568,novel_T012569,novel_T012570	213.18	184.81	212.86	229	184.35	187.54	168.97	193.11	-	-	ko00564//Glycerophospholipid metabolism;ko04725//Cholinergic synapse	-	-	-	gi|157366840|gb|ABV45411.1|/0/COE2, partial [Bemisia tabaci]
Btabaci_GLEAN_10018184	BTA019604.1,novel_T011838	212.36	258.26	194.1	155.71	200.67	241.81	229.41	188.71	-	-	ko05200//Pathways in cancer;ko05204//Chemical carcinogenesis;ko00980//Metabolism of xenobiotics by cytochrome P450;ko00982//Drug metabolism - cytochrome P450;ko05215//Prostate cancer;ko00480//Glutathione metabolism	-	GO:0016740//transferase activity	-	gi|199584541|gb|ACH90395.1|/4.62965e-129/glutathione-S-transferase [Bemisia tabaci]
Btabaci_GLEAN_10024566	BTA025849.1,novel_T015430,novel_T015431	211.75	210.75	177.25	170.94	163.55	138.66	126.16	120.31	-	-	-	-	-	-	gi|926630291|ref|XP_013780829.1|/6.92336e-15/PREDICTED: E3 ubiquitin-protein ligase RNF8-B-like [Limulus polyphemus]
Btabaci_GLEAN_10012499	BTA029454.2,novel_T017738,novel_T017739	211.53	235.12	218.49	222.29	282.01	189.56	303.87	289.71	-	-	ko04142//Lysosome;ko05205//Proteoglycans in cancer;ko04145//Phagosome;ko04612//Antigen processing and presentation;ko05323//Rheumatoid arthritis	-	GO:0016787//hydrolase activity	-	gi|749798912|ref|XP_011152977.1|/5.56027e-162/PREDICTED: cathepsin L [Harpegnathos saltator]
Btabaci_GLEAN_10022578	BTA005361.1	209.77	194.96	194.71	197.32	237.51	219.2	183.63	210.7	-	-	-	GO:0005759//mitochondrial matrix	-	GO:0006121//mitochondrial electron transport, succinate to ubiquinone;GO:0018293//protein-FAD linkage	gi|668466996|gb|KFB53917.1|/1.2295e-51/AGAP012191-PA-like protein [Anopheles sinensis]
Btabaci_GLEAN_10009913	BTA003363.1	208.95	294.18	141.65	152.91	362.93	387.46	373.75	362.87	-	-	ko03010//Ribosome	-	-	-	gi|118429565|gb|ABK91830.1|/4.65099e-46/60S acidic ribosomal protein P2 [Artemia franciscana]
Btabaci_GLEAN_10021908	BTA007915.1	207.19	324.74	177.72	182.88	384.69	432.57	466.09	388.37	-	-	ko03010//Ribosome	GO:0005840//ribosome	GO:0003735//structural constituent of ribosome	GO:0006412//translation	gi|559372887|gb|AHB12462.1|/1.23226e-127/60S Ribosomal Protein L15 [Pantala flavescens]
Btabaci_GLEAN_10018334	BTA019079.1,novel_T011480	206.81	353.96	150.96	152.76	395.54	491.13	457.01	492.64	-	-	ko03010//Ribosome	-	-	-	gi|156546944|ref|XP_001605124.1|/3.43919e-68/PREDICTED: 40S ribosomal protein S12 isoform X2 [Nasonia vitripennis]
CUFF83.587.2	BTA020071.1,novel_T012156,novel_T012157,novel_T012158	206.6	148.25	229.59	234.5	201.22	283.67	201.19	262.16	-	-	-	-	-	-	gi|915661032|gb|KOC63683.1|/8.49264e-60/Ribosome-binding protein 1 [Habropoda laboriosa]
Btabaci_GLEAN_10003243	BTA015258.1,novel_T009573,novel_T009574,novel_T009575,novel_T009576	206.29	155.51	244.26	224.31	198.06	276.41	198.79	284.63	-	-	ko01100//Metabolic pathways;ko01230//Biosynthesis of amino acids;ko00260//Glycine, serine and threonine metabolism	GO:0005829//cytosol	GO:0008732//L-allo-threonine aldolase activity	GO:0006545//glycine biosynthetic process;GO:0006567//threonine catabolic process	gi|170052611|ref|XP_001862301.1|/6.52448e-144/L-allo-threonine aldolase [Culex quinquefasciatus]
Btabaci_GLEAN_10004492	BTA012724.3,novel_T007931	204.59	338.66	134.15	150.79	348.08	399.86	406.44	369.78	-	-	ko03010//Ribosome	GO:0005622//intracellular	-	-	gi|641677073|ref|XP_008187640.1|/1.22545e-100/PREDICTED: ribosomal protein L13-like isoform X1 [Acyrthosiphon pisum]
Btabaci_GLEAN_10007267	BTA007709.1,novel_T004951	204.59	299.27	193.07	163.41	112.28	91.03	123.8	104.22	-	-	ko01100//Metabolic pathways;ko05016//Huntington's disease;ko05010//Alzheimer's disease;ko05012//Parkinson's disease;ko00190//Oxidative phosphorylation	-	-	-	gi|501291752|dbj|BAN20400.1|/1.82365e-159/ATP synthase gamma subunit [Riptortus pedestris]
Btabaci_GLEAN_10003056	BTA015660.2,novel_T009848	204.52	200.46	225.78	221.84	196.04	251.81	225.36	232.51	-	-	ko04141//Protein processing in endoplasmic reticulum;ko04010//MAPK signaling pathway;ko04932//Non-alcoholic fatty liver disease (NAFLD);ko04722//Neurotrophin signaling pathway;ko04071//Sphingolipid signaling pathway;ko05014//Amyotrophic lateral sclerosis (ALS);ko04668//TNF signaling pathway	-	-	-	gi|939258489|ref|XP_014249053.1|/4.22422e-109/PREDICTED: myophilin [Cimex lectularius]
Btabaci_GLEAN_10025276	BTA020763.1,novel_T012655,novel_T012656,novel_T012657,novel_T012658,novel_T012659,novel_T012660	204.17	280.12	171.82	178.31	293.34	380.58	393.56	382.46	-	-	ko03010//Ribosome	GO:0022627//cytosolic small ribosomal subunit	GO:0003735//structural constituent of ribosome	GO:0000028//ribosomal small subunit assembly;GO:0006412//translation	gi|122066029|sp|Q0PXX8.1|RSSA_DIACI/4.95112e-140/RecName: Full=40S ribosomal protein SA
CUFF1.78.1	BTA000039.1	203.43	199.63	189.08	176.25	253.66	271.2	252.58	250.07	-	-	ko05146//Amoebiasis;ko05110//Vibrio cholerae infection	-	-	-	gi|321462126|gb|EFX73151.1|/3.84473e-37/hypothetical protein DAPPUDRAFT_227138 [Daphnia pulex]
Btabaci_GLEAN_10011499	BTA000721.1	203.01	165.22	156.87	193.07	136.93	258.19	111.13	197.79	-	-	-	-	-	-	-
Btabaci_GLEAN_10016783	BTA022589.4,novel_T013812	202.15	234.33	159.24	159.03	204.39	192.42	182.78	201.06	-	-	ko01100//Metabolic pathways;ko01200//Carbon metabolism;ko01230//Biosynthesis of amino acids;ko00010//Glycolysis / Gluconeogenesis;ko04066//HIF-1 signaling pathway	-	-	-	gi|662201252|ref|XP_008473874.1|/0/PREDICTED: phosphoglycerate kinase isoform X2 [Diaphorina citri]
CUFF2.552.1	BTA000384.1	201.9	95.49	203.68	277.22	86.81	24.28	8.48	6.24	-	-	-	-	-	-	gi|939667980|ref|XP_014281049.1|/8.2206e-76/PREDICTED: calphotin-like [Halyomorpha halys]
Btabaci_GLEAN_10026844	BTA024587.1,novel_T014733	201.69	147.07	230.83	213.05	145.29	112.93	142.9	145.3	-	-	ko04142//Lysosome;ko04145//Phagosome;ko05152//Tuberculosis	-	-	-	gi|939259559|ref|XP_014249607.1|/2.08888e-92/PREDICTED: lysosome-associated membrane glycoprotein 5 [Cimex lectularius]
Btabaci_GLEAN_10013846	BTA027425.1,novel_T016481,novel_T016482	200.08	176.21	252.72	238.63	200.04	194.67	191.45	232.35	-	-	ko03013//RNA transport	-	-	-	gi|939241128|ref|XP_014239812.1|/0/PREDICTED: eukaryotic translation initiation factor 5 [Cimex lectularius]
Btabaci_GLEAN_10017842	BTA020433.2,novel_T012431	199.44	125.49	256.02	244.14	189.13	400.1	165	221.6	-	-	-	GO:0005622//intracellular	GO:0005215//transporter activity;GO:0016787//hydrolase activity	GO:0006810//transport	gi|985388364|ref|XP_015378737.1|/0/PREDICTED: alpha-tocopherol transfer protein-like [Diuraphis noxia]
Btabaci_GLEAN_10017297	BTA021584.1,novel_T013263	199.43	315.23	151.31	143.76	167.23	97.75	104.22	103.03	-	-	ko01100//Metabolic pathways;ko01200//Carbon metabolism;ko01230//Biosynthesis of amino acids;ko00630//Glyoxylate and dicarboxylate metabolism;ko00020//Citrate cycle (TCA cycle);ko01210//2-Oxocarboxylic acid metabolism	GO:0005759//mitochondrial matrix	GO:0004108//citrate (Si)-synthase activity	GO:0005975//carbohydrate metabolic process;GO:0006099//tricarboxylic acid cycle	gi|1000203856|gb|KXJ75524.1|/0/hypothetical protein RP20_CCG011547 [Aedes albopictus]
Btabaci_GLEAN_10019001	BTA017822.3,novel_T011034	199.41	126.91	278.48	287.69	127.93	176.22	114.04	145.9	-	-	ko05200//Pathways in cancer;ko04360//Axon guidance;ko05210//Colorectal cancer	-	-	-	gi|1000757250|ref|XP_015601581.1|/0/PREDICTED: protein turtle isoform X3 [Cephus cinctus]
Btabaci_GLEAN_10005710	BTA010476.1,novel_T006630	198.84	215.84	166.44	154.02	164.57	109.96	121.96	107.89	-	-	ko01100//Metabolic pathways;ko01200//Carbon metabolism;ko00020//Citrate cycle (TCA cycle);ko00640//Propanoate metabolism	-	-	-	gi|501297758|dbj|BAN21224.1|/0/succinyl-coa synthetase beta chain [Riptortus pedestris]
Btabaci_GLEAN_10019423	BTA016674.1,novel_T010422,novel_T010423,novel_T010424	198.28	179.32	173.14	170.19	162.11	99.94	139.75	124.45	-	-	ko04142//Lysosome;ko04612//Antigen processing and presentation;ko04924//Renin secretion	-	-	-	gi|328712819|ref|XP_001942906.2|/0/PREDICTED: tubulointerstitial nephritis antigen-like isoform X2 [Acyrthosiphon pisum]
Btabaci_GLEAN_10018112	BTA019796.1,novel_T011924	198.18	162.19	229.66	207.34	170.78	186.3	148.8	148.62	-	-	ko05146//Amoebiasis;ko05110//Vibrio cholerae infection	-	-	-	gi|645004182|ref|XP_008212855.1|/7.06898e-43/PREDICTED: proline-rich extensin-like protein EPR1 [Nasonia vitripennis]
Btabaci_GLEAN_10021594	BTA009137.1,novel_T005791,novel_T005792,novel_T005793,novel_T005794	195.95	196.93	183.21	185.53	182.61	145.62	162.72	166.24	-	-	-	-	-	-	gi|939696810|ref|XP_014292547.1|/0/PREDICTED: muscle LIM protein Mlp84B-like isoform X2 [Halyomorpha halys]
Btabaci_GLEAN_10010120	BTA002965.1,novel_T001969,novel_T001970	195.18	148.72	228.66	216.25	115.07	59.5	83.9	100.18	-	-	ko04724//Glutamatergic synapse	GO:0043229//intracellular organelle;GO:0044425	-	-	gi|641669714|ref|XP_008184922.1|/0/PREDICTED: excitatory amino acid transporter 1 isoform X2 [Acyrthosiphon pisum]
Btabaci_GLEAN_10021532	BTA009311.1,novel_T005942	194.91	199.13	143.75	146.94	209.11	122.74	175.35	173.73	-	-	ko05016//Huntington's disease;ko05014//Amyotrophic lateral sclerosis (ALS);ko00480//Glutathione metabolism;ko04918//Thyroid hormone synthesis;ko00590//Arachidonic acid metabolism	GO:0016021//integral component of membrane	GO:0004602//glutathione peroxidase activity	GO:0006979//response to oxidative stress;GO:0055114//oxidation-reduction process;GO:0098869//cellular oxidant detoxification	gi|985410696|ref|XP_015370806.1|/3.82606e-81/PREDICTED: probable phospholipid hydroperoxide glutathione peroxidase isoform X2 [Diuraphis noxia]
CUFF47.363.1	BTA011211.1	194.83	196.74	128.11	206.08	183.13	389.28	184.91	258.84	-	-	-	-	-	-	-
Btabaci_GLEAN_10024181	BTA028606.1,novel_T017091	194.82	173.23	225.85	221.26	176.63	130.25	153.82	144.61	-	-	-	-	-	-	gi|209571429|dbj|BAG75121.1|/0/lipophorin precursor [Nilaparvata lugens]
Btabaci_GLEAN_10024794	BTA024417.1,novel_T014587,novel_T014588,novel_T014589	194.36	139.52	265.53	267.99	138.26	121.47	115.37	130.73	-	-	ko04961//Endocrine and other factor-regulated calcium reabsorption	-	GO:0005509//calcium ion binding	-	gi|646720588|gb|KDR22249.1|/0/hypothetical protein L798_02354 [Zootermopsis nevadensis]
Btabaci_GLEAN_10025286	BTA020461.1,novel_T012452,novel_T012453,novel_T012454,novel_T012455	194.32	311.5	152.66	151.45	342.93	439.61	391.55	347.39	-	-	ko04310//Wnt signaling pathway;ko04330//Notch signaling pathway	-	-	-	gi|939653761|ref|XP_014275611.1|/0/PREDICTED: protein groucho-like isoform X3 [Halyomorpha halys]
Btabaci_GLEAN_10003494	BTA014704.1	194.16	282.64	149.95	156.6	306.81	452.01	388.94	415.28	-	-	ko03010//Ribosome	GO:0015935//small ribosomal subunit	GO:0003723//RNA binding;GO:0003735//structural constituent of ribosome	GO:0006412//translation	gi|1000724866|ref|XP_015584996.1|/3.23366e-134/PREDICTED: 40S ribosomal protein S5 [Cephus cinctus]
Btabaci_GLEAN_10015163	BTA025481.1	193.52	269.04	120.62	115.37	309.09	386.47	355.21	395.38	-	-	ko03010//Ribosome	-	-	-	gi|970917036|ref|XP_015124977.1|/5.48584e-96/PREDICTED: 60S ribosomal protein L12 [Diachasma alloeum]
Btabaci_GLEAN_10024048	BTA029144.1,novel_T017505	193.52	217.91	166.25	160.61	191.25	221.17	171.01	198.39	-	-	ko05016//Huntington's disease;ko04146//Peroxisome;ko04068//FoxO signaling pathway	-	GO:0016491//oxidoreductase activity	GO:0006801//superoxide metabolic process	gi|414073178|gb|AFW97646.1|/1.22041e-144/Mn superoxide dismutase [Bemisia tabaci]
Btabaci_GLEAN_10005203	BTA011362.1,novel_T007154	193.46	265.83	129.68	129.57	262.36	410.81	358.16	407.12	-	-	ko03010//Ribosome	GO:0005840//ribosome	GO:0003735//structural constituent of ribosome	GO:0006412//translation	gi|391325479|ref|XP_003737261.1|/2.57225e-63/PREDICTED: 60S ribosomal protein L30-like isoform 1 [Metaseiulus occidentalis]
Btabaci_GLEAN_10025973	BTA011643.1,novel_T007351,novel_T007352,novel_T007353,novel_T007354,novel_T007355	192.36	378.77	17.31	21.32	228.57	86.48	175.96	118.12	-	-	ko04015//Rap1 signaling pathway;ko05010//Alzheimer's disease;ko04024//cAMP signaling pathway;ko04910//Insulin signaling pathway;ko04022//cGMP-PKG signaling pathway;ko04014//Ras signaling pathway;ko05034//Alcoholism;ko04020//Calcium signaling pathway;ko04970//Salivary secretion;ko05133//Pertussis;ko04114//Oocyte meiosis;ko04261//Adrenergic signaling in cardiomyocytes;ko04270//Vascular smooth muscl…	-	-	-	gi|307174511|gb|EFN64973.1|/3.05892e-119/Troponin C, isoform 1, partial [Camponotus floridanus]
Btabaci_GLEAN_10011204	BTA001192.1,novel_T000697	192.14	239.66	154.75	162.73	188.05	176.02	152.47	157.53	-	-	ko01100//Metabolic pathways;ko05016//Huntington's disease;ko05010//Alzheimer's disease;ko05012//Parkinson's disease;ko00190//Oxidative phosphorylation;ko04932//Non-alcoholic fatty liver disease (NAFLD)	-	-	-	gi|939280475|ref|XP_014260850.1|/1.05383e-115/PREDICTED: NADH dehydrogenase [ubiquinone] 1 alpha subcomplex subunit 10, mitochondrial [Cimex lectularius]
Btabaci_GLEAN_10004120	BTA013463.1,novel_T008502,novel_T008503,novel_T008504,novel_T008505,novel_T008506,novel_T008507,novel_T008508,novel_T008509,novel_T008510,novel_T008511,novel_T008512,novel_T008513,novel_T008514	191.44	146.08	234.33	214.49	156.16	124.25	143.87	130.74	-	-	-	-	-	-	gi|662186610|ref|XP_008483019.1|/0/PREDICTED: leucine-rich repeat-containing protein 15-like [Diaphorina citri]
Btabaci_GLEAN_10006406	BTA009266.1,novel_T005910	190.75	138.41	230.33	220.16	160.25	176.42	165.75	212.7	-	-	-	-	-	-	gi|642913508|ref|XP_008201043.1|/5.36399e-117/PREDICTED: corticotropin-releasing factor-binding protein isoform X2 [Tribolium castaneum]
Btabaci_GLEAN_10023007	BTA003566.1,novel_T002465,novel_T002466	190.63	132.32	195.21	192.06	137.23	148.6	138.43	173.72	-	-	-	-	-	-	gi|549129994|dbj|BAO00945.1|/4.87136e-32/CRF-related diuretic hormone 45 [Nilaparvata lugens]
Btabaci_GLEAN_10027155	BTA009037.1	189.45	170.28	167.36	171.75	205.06	195.29	213.23	239.22	-	-	-	-	-	-	gi|399631495|gb|AFP49817.1|/0/cytochrome P450 [Bemisia tabaci]
Btabaci_GLEAN_10010681	BTA002021.1	189.36	225.33	147.32	135.52	171.12	198.54	177.91	198.59	-	-	ko01100//Metabolic pathways;ko05016//Huntington's disease;ko05010//Alzheimer's disease;ko05012//Parkinson's disease;ko00190//Oxidative phosphorylation;ko04932//Non-alcoholic fatty liver disease (NAFLD)	-	-	-	gi|357621000|gb|EHJ72986.1|/1.00641e-29/putative mitochondrial NADH:ubiquinone oxidoreductase ESSS subunit [Danaus plexippus]
Btabaci_GLEAN_10005692	BTA010501.1,novel_T006637,novel_T006638,novel_T006639,novel_T006640,novel_T006641,novel_T006642,novel_T006643	189.04	266.3	184.65	205.92	286.41	243.84	289.58	251.96	-	-	ko04015//Rap1 signaling pathway;ko05010//Alzheimer's disease;ko04024//cAMP signaling pathway;ko04910//Insulin signaling pathway;ko04022//cGMP-PKG signaling pathway;ko04014//Ras signaling pathway;ko05034//Alcoholism;ko04020//Calcium signaling pathway;ko04970//Salivary secretion;ko05133//Pertussis;ko04114//Oocyte meiosis;ko04261//Adrenergic signaling in cardiomyocytes;ko04270//Vascular smooth muscl…	-	GO:0005509//calcium ion binding;GO:0032440//2-alkenal reductase [NAD(P)] activity	GO:0055114//oxidation-reduction process	gi|646710889|gb|KDR16279.1|/5.25551e-64/Calmodulin [Zootermopsis nevadensis]
Btabaci_GLEAN_10025375	BTA019904.1,novel_T012032	188.55	132.91	228.51	198.4	149.79	187.03	148.89	146.76	-	-	ko04970//Salivary secretion	-	-	-	gi|939666634|ref|XP_014280495.1|/1.35512e-22/PREDICTED: mediator of RNA polymerase II transcription subunit 15 [Halyomorpha halys]
Btabaci_GLEAN_10024187	BTA028613.1,novel_T017095,novel_T017096,novel_T017097	187.45	187.22	165.06	187.74	211.66	173.41	171.43	193.91	-	-	ko01100//Metabolic pathways;ko01200//Carbon metabolism;ko01212//Fatty acid metabolism;ko00280//Valine, leucine and isoleucine degradation;ko00071//Fatty acid degradation;ko03320//PPAR signaling pathway;ko00640//Propanoate metabolism;ko00410//beta-Alanine metabolism	-	GO:0003995//acyl-CoA dehydrogenase activity;GO:0050660//flavin adenine dinucleotide binding	GO:0055114//oxidation-reduction process	gi|91079744|ref|XP_970506.1|/0/PREDICTED: probable medium-chain specific acyl-CoA dehydrogenase, mitochondrial [Tribolium castaneum]
Btabaci_GLEAN_10023506	BTA001714.1,novel_T001078	187.33	168.23	197.62	230.81	169.18	266.95	140.3	231.87	-	-	-	-	-	-	-
Btabaci_GLEAN_10004951	BTA011850.1,novel_T007458,novel_T007459	186.53	181.2	166.59	159.31	179.38	205.66	166.66	157.5	-	-	-	-	-	-	gi|817087542|ref|XP_012266552.1|/6.85536e-17/PREDICTED: icarapin-like [Athalia rosae]
Btabaci_GLEAN_10004385	BTA012954.1,novel_T008139	186.15	137.01	145.63	153.55	158.8	255.81	145.58	219.45	-	-	ko05146//Amoebiasis;ko05110//Vibrio cholerae infection	-	-	-	gi|801372457|ref|XP_012062823.1|/6.28721e-18/PREDICTED: cell wall protein DAN4-like [Atta cephalotes]
Btabaci_GLEAN_10019115	BTA017585.2,novel_T010885,novel_T010886	185.72	418.71	103.93	69.53	433.42	240.41	498.36	254.33	-	-	ko05146//Amoebiasis;ko05110//Vibrio cholerae infection	-	-	-	gi|315307982|gb|ADU04394.1|/0/vitellogenin [Bemisia tabaci]
Btabaci_GLEAN_10010723	BTA001945.1,novel_T001262	185.65	162.49	192.55	205.59	151.1	170.53	145.38	166.78	-	-	ko05169//Epstein-Barr virus infection;ko04151//PI3K-Akt signaling pathway;ko05130//Pathogenic Escherichia coli infection;ko05203//Viral carcinogenesis;ko04390//Hippo signaling pathway;ko04391//Hippo signaling pathway - fly;ko04110//Cell cycle;ko04114//Oocyte meiosis;ko05161//Hepatitis B	-	-	-	gi|646708878|gb|KDR15025.1|/0/14-3-3 protein zeta [Zootermopsis nevadensis]
Btabaci_GLEAN_10011135	BTA001383.1,novel_T000847,novel_T000848	185.52	151.18	235.86	222.57	175.21	168.71	155.92	175.21	-	-	-	-	-	-	gi|755949303|ref|XP_011301068.1|/4.98264e-49/PREDICTED: lipoma HMGIC fusion partner-like 2 protein [Fopius arisanus]
Btabaci_GLEAN_10026921	BTA022440.1	184.46	155.08	144.89	178.44	186.34	356.27	171.32	260.94	-	-	-	-	-	-	-
Btabaci_GLEAN_10008705	BTA005328.1	183.76	241.3	190.53	159.51	206.15	317.59	218.46	163.05	-	-	ko03010//Ribosome	GO:0005840//ribosome	GO:0003735//structural constituent of ribosome	GO:0006412//translation	gi|646698025|gb|KDR09401.1|/9.9557e-99/40S ribosomal protein S14 [Zootermopsis nevadensis]
CUFF4.188.1	BTA001081.1,novel_T000619	182.3	236.23	194.33	152.14	211.49	285.48	181.57	260.55	-	-	ko01100//Metabolic pathways;ko05016//Huntington's disease;ko05010//Alzheimer's disease;ko05012//Parkinson's disease;ko00190//Oxidative phosphorylation;ko04932//Non-alcoholic fatty liver disease (NAFLD)	-	-	-	gi|282721012|ref|NP_001164206.1|/3.09771e-21/NADH dehydrogenase (ubiquinone) Fe-S protein 5, 15kDa (NADH-coenzyme Q reductase) [Tribolium castaneum]
Btabaci_GLEAN_10002949	BTA015945.1,novel_T010032	182.13	191.28	197.62	193.13	186.48	141.01	165.37	176.52	-	-	ko04142//Lysosome;ko04612//Antigen processing and presentation;ko04924//Renin secretion	GO:0005615//extracellular space;GO:0005764//lysosome;GO:0098595//perivitelline space	GO:0004197//cysteine-type endopeptidase activity	GO:0019233//sensory perception of pain;GO:0035071//salivary gland cell autophagic cell death;GO:0051603//proteolysis involved in cellular protein catabolic process	gi|170028910|ref|XP_001842337.1|/1.59565e-164/cathepsin L [Culex quinquefasciatus]
Btabaci_GLEAN_10011887	BTA000220.1,novel_T000232	182.06	128.68	252.66	238.5	109.61	48.4	115.98	110.63	-	-	-	-	-	-	gi|646703955|gb|KDR12365.1|/4.00631e-34/hypothetical protein L798_13658 [Zootermopsis nevadensis]
Btabaci_GLEAN_10008493	BTA005667.1,novel_T003701	181.31	123.07	239.18	242.18	115.66	45.02	92.95	105.63	-	-	ko04721//Synaptic vesicle cycle	-	GO:0019905//syntaxin binding	GO:0006836//neurotransmitter transport	gi|347976443|ref|XP_001237245.3|/8.21068e-57/AGAP003509-PA [Anopheles gambiae str. PEST]
Btabaci_GLEAN_10008097	BTA006276.1,novel_T003970,novel_T003971,novel_T003972,novel_T003973	180.75	257.99	124.85	135.93	292.94	336.12	358.06	310.24	-	-	ko03010//Ribosome	-	-	-	gi|557785007|ref|XP_005192105.1|/4.05426e-67/PREDICTED: transport and Golgi organization protein 1 isoform X2 [Musca domestica]
Btabaci_GLEAN_10012853	BTA028840.1,novel_T017232	180.73	163.76	168.99	169.55	167.3	135.2	210.88	206.83	-	-	ko01212//Fatty acid metabolism;ko01040//Biosynthesis of unsaturated fatty acids	-	-	-	gi|225709748|gb|ACO10720.1|/1.14307e-60/Omega-3 fatty acid desaturase, endoplasmic reticulum [Caligus rogercresseyi]
Btabaci_GLEAN_10015315	BTA025236.3	180.27	157.5	199.39	203.49	164.21	126.3	149.02	183.51	-	-	ko04141//Protein processing in endoplasmic reticulum;ko03060//Protein export	GO:0016020//membrane	-	-	gi|985401039|ref|XP_015368219.1|/5.20648e-134/PREDICTED: translocation protein SEC62 [Diuraphis noxia]
Btabaci_GLEAN_10011725	BTA000481.1,novel_T000404	179.88	152.15	203.03	182.9	222.72	269.33	224.59	271.04	-	-	-	-	GO:0005488	-	gi|939694967|ref|XP_014291569.1|/2.4633e-106/PREDICTED: apolipoprotein D-like [Halyomorpha halys]
Btabaci_GLEAN_10012750	BTA029004.1,novel_T017348	179.28	193.38	147.97	136.32	173.67	146.57	136.16	157.85	-	-	ko04970//Salivary secretion	-	-	-	gi|328708975|ref|XP_003243839.1|/1.00532e-19/PREDICTED: uncharacterized protein LOC100573041 isoform X2 [Acyrthosiphon pisum]
Btabaci_GLEAN_10001497	BTA019696.1,novel_T011879	179.13	115.54	243.12	235.33	150.79	223.21	128.03	208.27	-	-	ko04810//Regulation of actin cytoskeleton;ko05205//Proteoglycans in cancer;ko05100//Bacterial invasion of epithelial cells;ko04062//Chemokine signaling pathway;ko04510//Focal adhesion;ko05203//Viral carcinogenesis;ko04670//Leukocyte transendothelial migration;ko04370//VEGF signaling pathway	-	-	-	gi|307213606|gb|EFN88992.1|/7.89669e-15/hypothetical protein EAI_11785 [Harpegnathos saltator]
Btabaci_GLEAN_10026365	BTA005156.1	178.8	209.82	176.87	182.74	184.97	273.56	178.56	198.59	-	-	-	-	-	-	gi|572310544|ref|XP_006621026.1|/4.51322e-73/PREDICTED: peroxiredoxin 1-like [Apis dorsata]
Btabaci_GLEAN_10005298	BTA011230.1,novel_T007074	178.57	292.18	25.66	26.58	130.31	60.46	98.76	65.49	-	-	ko04142//Lysosome;ko05205//Proteoglycans in cancer;ko04145//Phagosome;ko04612//Antigen processing and presentation;ko05323//Rheumatoid arthritis	-	-	-	gi|332373264|gb|AEE61773.1|/1.68159e-40/unknown [Dendroctonus ponderosae]
Btabaci_GLEAN_10025311	BTA020488.1	178.17	325.43	132.19	143.44	298.91	336.95	347.86	300.34	-	-	ko03010//Ribosome	GO:0030529//intracellular ribonucleoprotein complex	-	-	gi|668457481|gb|KFB45497.1|/4.82712e-61/60S ribosomal protein L13a [Anopheles sinensis]
Btabaci_GLEAN_10019891	BTA015105.1,novel_T009472	177.64	284.98	177.25	162.26	194.37	188.92	257.48	163.52	-	-	-	-	-	-	gi|339896251|gb|AEK21811.1|/0/cytochrome P450 [Bemisia tabaci]
Btabaci_GLEAN_10008629	BTA005473.1,novel_T003613	176.81	258.3	149.98	139.84	308.07	384.02	343.76	371.17	-	-	ko03010//Ribosome	GO:0015935//small ribosomal subunit	GO:0003723//RNA binding;GO:0003735//structural constituent of ribosome	GO:0006412//translation	gi|752896882|ref|XP_011266719.1|/6.19328e-63/PREDICTED: 40S ribosomal protein S5 [Camponotus floridanus]
Btabaci_GLEAN_10023081	BTA003306.1,novel_T002317	176.49	278.49	110.89	130.19	240.76	299.69	259.23	213.61	-	-	ko03010//Ribosome	GO:0005840//ribosome	GO:0000166//nucleotide binding;GO:0003735//structural constituent of ribosome	GO:0006412//translation	gi|91079684|ref|XP_967577.1|/1.4261e-70/PREDICTED: 40S ribosomal protein S24 isoform X2 [Tribolium castaneum]
Btabaci_GLEAN_10012736	BTA029032.1,novel_T017370,novel_T017371,novel_T017372,novel_T017373,novel_T017374,novel_T017375	176.45	159.12	196.09	169.99	164.31	138.78	137.22	144.53	-	-	-	-	-	-	gi|328700166|ref|XP_001950896.2|/1.0724e-132/PREDICTED: longitudinals lacking protein, isoforms H/M/V-like [Acyrthosiphon pisum]
Btabaci_GLEAN_10009203	BTA004541.1,novel_T003081	176.04	163.14	173.28	174.34	167.72	147.98	111.1	134.16	-	-	ko01100//Metabolic pathways;ko00040//Pentose and glucuronate interconversions;ko00052//Galactose metabolism;ko00561//Glycerolipid metabolism;ko00051//Fructose and mannose metabolism	-	-	-	gi|156542285|ref|XP_001602440.1|/4.61758e-152/PREDICTED: alcohol dehydrogenase [NADP(+)] B-like [Nasonia vitripennis]
Btabaci_GLEAN_10012958	BTA028670.2,novel_T017129	175.98	192.97	141.55	132.08	187.53	164.58	180.08	201.21	-	-	ko04141//Protein processing in endoplasmic reticulum;ko04010//MAPK signaling pathway;ko04932//Non-alcoholic fatty liver disease (NAFLD);ko04722//Neurotrophin signaling pathway;ko04071//Sphingolipid signaling pathway;ko05014//Amyotrophic lateral sclerosis (ALS);ko04668//TNF signaling pathway	-	-	-	gi|662205302|ref|XP_008476059.1|/5.27845e-109/PREDICTED: muscle-specific protein 20 [Diaphorina citri]
Btabaci_GLEAN_10003333	BTA015084.1,novel_T009461	175.84	157.02	148.45	163.01	144.42	187.17	154.63	203.67	-	-	-	-	-	-	gi|16769728|gb|AAL29083.1|/1.31949e-22/LP01629p [Drosophila melanogaster]
CUFF30.165.1	BTA007070.1,novel_T004516	175.51	258.55	85.55	84.27	172.4	184.38	162.77	170.77	-	-	ko01100//Metabolic pathways;ko05016//Huntington's disease;ko05010//Alzheimer's disease;ko05012//Parkinson's disease;ko00190//Oxidative phosphorylation	GO:0000275//mitochondrial proton-transporting ATP synthase complex, catalytic core F(1)	GO:0010997//anaphase-promoting complex binding;GO:0046933//proton-transporting ATP synthase activity, rotational mechanism;GO:0046961//proton-transporting ATPase activity, rotational mechanism;GO:0097027//ubiquitin-protein transferase activator activity	GO:0015986//ATP synthesis coupled proton transport;GO:0050790//regulation of catalytic activity	gi|187175309|ref|NP_001119671.1|/1.21501e-24/stunted-like isoform A [Acyrthosiphon pisum]
Btabaci_GLEAN_10026350	BTA005142.1	175.41	195.53	128.61	147.26	184.62	205.12	161.54	155.14	-	-	ko01100//Metabolic pathways;ko05016//Huntington's disease;ko05010//Alzheimer's disease;ko05012//Parkinson's disease;ko00190//Oxidative phosphorylation;ko04932//Non-alcoholic fatty liver disease (NAFLD)	-	-	-	gi|91087395|ref|XP_975662.1|/1.10051e-64/PREDICTED: NADH dehydrogenase [ubiquinone] iron-sulfur protein 4, mitochondrial isoform X1 [Tribolium castaneum]
Btabaci_GLEAN_10023476	BTA001686.1	175.31	276.25	141.92	140.15	166.67	273.2	175.48	162.85	-	-	ko03010//Ribosome	GO:0005840//ribosome	-	-	gi|662188120|ref|XP_008487718.1|/2.12251e-71/PREDICTED: 40S ribosomal protein S25 isoform X1 [Diaphorina citri]
Btabaci_GLEAN_10023324	BTA002389.1,novel_T001565	175.27	279.02	119.38	132.61	318.04	406.83	448.16	420.06	-	-	ko03010//Ribosome	GO:0005840//ribosome	-	-	gi|662188120|ref|XP_008487718.1|/5.62772e-70/PREDICTED: 40S ribosomal protein S25 isoform X1 [Diaphorina citri]
Btabaci_GLEAN_10025567	BTA017572.1,novel_T010870	175.2	277.97	141.92	125.66	243.57	414.83	356.75	349.72	-	-	ko03010//Ribosome	GO:0005840//ribosome	GO:0003735//structural constituent of ribosome;GO:0019843//rRNA binding	GO:0006412//translation	gi|914100868|ref|NP_001298608.1|/4.56525e-76/40S ribosomal protein S18 [Papilio polytes]
Btabaci_GLEAN_10019922	BTA015000.1	174.87	175.64	166.67	160.53	187.22	138.45	163.81	157.6	-	-	-	-	-	-	gi|939233535|ref|XP_014240739.1|/4.83158e-114/PREDICTED: uncharacterized protein LOC106661696 isoform X2 [Cimex lectularius]
CUFF77.160.1	BTA018500.1,novel_T011246	174.48	244.81	128.1	98.25	244.16	322.69	330.57	272.36	-	-	ko03010//Ribosome	GO:0022627//cytosolic small ribosomal subunit	GO:0003735//structural constituent of ribosome	GO:0002181//cytoplasmic translation	gi|121543975|gb|ABM55652.1|/1.56057e-37/ribosomal protein S28e-like protein [Maconellicoccus hirsutus]
Btabaci_GLEAN_10011429	BTA000828.1,novel_T000502	174.47	217.57	163.56	139.78	247.59	161.07	254.98	239.81	-	-	ko01100//Metabolic pathways;ko01200//Carbon metabolism;ko00620//Pyruvate metabolism;ko03320//PPAR signaling pathway	-	-	-	gi|443419066|gb|AGC84405.1|/0/NADP-dependent malic enzyme-like protein [Locusta migratoria]
Btabaci_GLEAN_10003093	BTA015608.1	173.94	171.38	221.3	189.06	140.68	93.69	139.73	142.51	-	-	ko04120//Ubiquitin mediated proteolysis;ko04310//Wnt signaling pathway;ko04115//p53 signaling pathway	-	-	-	gi|646711578|gb|KDR16693.1|/5.67188e-68/Cysteine and histidine-rich protein 1-like protein [Zootermopsis nevadensis]
Btabaci_GLEAN_10021415	BTA009753.1,novel_T006220	173.42	294.14	128.07	141.41	155.18	208.09	165.66	146.3	-	-	ko03013//RNA transport;ko05134//Legionellosis	-	-	-	gi|924560850|gb|ALC45508.1|/0/Ef1alpha48D [Drosophila busckii]
Btabaci_GLEAN_10017791	BTA020552.1,novel_T012520	173.05	186.65	162	205.72	169.57	128.38	151.29	147.26	-	-	ko04141//Protein processing in endoplasmic reticulum	GO:0005783//endoplasmic reticulum	GO:0003756//protein disulfide isomerase activity	GO:0045454//cell redox homeostasis	gi|646718913|gb|KDR21216.1|/0/Protein disulfide-isomerase [Zootermopsis nevadensis]
Btabaci_GLEAN_10020010	BTA014616.1,novel_T009212	172.88	94.5	317.92	237.78	60.03	64.3	30.52	50.51	-	-	ko05146//Amoebiasis;ko05110//Vibrio cholerae infection	-	-	-	gi|646714048|gb|KDR18153.1|/8.68678e-67/Larval cuticle protein 2 [Zootermopsis nevadensis]
Btabaci_GLEAN_10006297	BTA009447.1	172.46	249.47	146.17	149.36	210.23	223.78	201.98	233.14	-	-	ko01100//Metabolic pathways;ko05016//Huntington's disease;ko05010//Alzheimer's disease;ko05012//Parkinson's disease;ko00190//Oxidative phosphorylation;ko04932//Non-alcoholic fatty liver disease (NAFLD)	-	-	-	gi|675373612|gb|KFM66514.1|/1.76117e-22/NADH dehydrogenase [ubiquinone] 1 alpha subcomplex subunit 7, partial [Stegodyphus mimosarum]
Btabaci_GLEAN_10019906	BTA015119.1,novel_T009481	172.32	152.5	109.48	160.29	102.21	171.81	80.82	111.56	-	-	ko04970//Salivary secretion	-	-	-	gi|780613911|ref|XP_011691231.1|/3.13719e-07/PREDICTED: uncharacterized protein DDB_G0271670-like isoform X2 [Wasmannia auropunctata]
Btabaci_GLEAN_10023080	BTA003305.1,novel_T002316	172.27	210.61	149.43	127.4	160.61	171.75	137.93	139.89	-	-	ko01100//Metabolic pathways;ko05016//Huntington's disease;ko05010//Alzheimer's disease;ko05012//Parkinson's disease;ko00190//Oxidative phosphorylation;ko04932//Non-alcoholic fatty liver disease (NAFLD)	-	-	-	gi|929379841|ref|XP_014100273.1|/1.3699e-38/PREDICTED: NADH dehydrogenase [ubiquinone] 1 beta subcomplex subunit 5, mitochondrial [Bactrocera oleae]
Btabaci_GLEAN_10023355	BTA002147.1,novel_T001403,novel_T001404,novel_T001405	172.06	159.87	152.13	162.34	163.26	166.86	155.57	159.35	-	-	ko01100//Metabolic pathways;ko00500//Starch and sucrose metabolism;ko00040//Pentose and glucuronate interconversions;ko04976//Bile secretion;ko00983//Drug metabolism - other enzymes;ko00860//Porphyrin and chlorophyll metabolism;ko00830//Retinol metabolism;ko05204//Chemical carcinogenesis;ko00980//Metabolism of xenobiotics by cytochrome P450;ko00053//Ascorbate and aldarate metabolism;ko00982//Drug…	-	-	GO:0008152//metabolic process	gi|646698120|gb|KDR09454.1|/1.50346e-123/UDP-glucuronosyltransferase 2B4 [Zootermopsis nevadensis]
CUFF59.440.1	BTA014253.1	171.85	157.31	149.09	181.48	162.07	248.7	163.18	219.31	-	-	ko01100//Metabolic pathways;ko00520//Amino sugar and nucleotide sugar metabolism	-	-	-	gi|568260342|gb|ETN68068.1|/3.64388e-84/brain chitinase and chia [Anopheles darlingi]
Btabaci_GLEAN_10021971	BTA007576.2	171.03	157.7	194.03	202.01	144.68	137.83	137.75	159.4	-	-	-	-	-	-	gi|929374678|ref|XP_014097414.1|/0/PREDICTED: phosphate carrier protein, mitochondrial [Bactrocera oleae]
Btabaci_GLEAN_10025445	BTA019047.1	171.03	157.7	194.03	202.01	144.68	137.83	137.75	159.4	-	-	-	-	-	-	gi|929374678|ref|XP_014097414.1|/0/PREDICTED: phosphate carrier protein, mitochondrial [Bactrocera oleae]
Btabaci_GLEAN_10020413	BTA013392.2,novel_T008441,novel_T008442,novel_T008443	169.79	167.9	233.41	212.56	167.62	204.18	179.64	215.48	-	-	ko05014//Amyotrophic lateral sclerosis (ALS)	-	-	-	gi|357619158|gb|EHJ71838.1|/3.50409e-40/hypothetical protein KGM_17211 [Danaus plexippus]
Btabaci_GLEAN_10021139	BTA010819.2,novel_T006867	169.44	301.17	157.75	158.35	335.08	308.44	405.35	313.06	-	-	-	-	-	-	gi|817060229|ref|XP_012251658.1|/3.74549e-75/PREDICTED: Y-box factor homolog isoform X1 [Athalia rosae]
Btabaci_GLEAN_10026196	BTA008381.1,novel_T005397,novel_T005398	169.35	185.33	158.84	143.33	208.25	96.56	245.83	217.42	-	-	ko04152//AMPK signaling pathway;ko01212//Fatty acid metabolism;ko03320//PPAR signaling pathway;ko01040//Biosynthesis of unsaturated fatty acids	GO:0016021//integral component of membrane	GO:0016717//oxidoreductase activity, acting on paired donors, with oxidation of a pair of donors resulting in the reduction of molecular oxygen to two molecules of water	GO:0006633//fatty acid biosynthetic process;GO:0055114//oxidation-reduction process	gi|662208347|ref|XP_008477720.1|/0/PREDICTED: acyl-CoA Delta(11) desaturase [Diaphorina citri]
Btabaci_GLEAN_10012028	BTA030099.2,novel_T018076,novel_T018077	168.98	150.43	169.44	164.39	162.39	191.38	157.78	170.71	-	-	ko03018//RNA degradation	-	-	-	gi|662214351|ref|XP_008481003.1|/1.70641e-85/PREDICTED: TLD domain-containing protein 1 [Diaphorina citri]
Btabaci_GLEAN_10018245	BTA019327.1,novel_T011603	168.51	180.07	174.44	155.92	170.66	174.37	163.08	153.23	-	-	ko03040//Spliceosome	-	-	-	gi|936710261|ref|XP_014233094.1|/4.32498e-141/PREDICTED: heterogeneous nuclear ribonucleoprotein A1, A2/B1 homolog [Trichogramma pretiosum]
Btabaci_GLEAN_10013773	BTA027654.1	168.2	186.48	138.57	100.59	175.84	200.61	124.63	146.03	-	-	ko01100//Metabolic pathways;ko05016//Huntington's disease;ko05010//Alzheimer's disease;ko05012//Parkinson's disease;ko00190//Oxidative phosphorylation;ko04932//Non-alcoholic fatty liver disease (NAFLD)	-	-	-	gi|478259598|gb|ENN79451.1|/1.55676e-11/hypothetical protein YQE_04095, partial [Dendroctonus ponderosae]
Btabaci_GLEAN_10017659	BTA020880.1,novel_T012734	168.05	209.82	154.27	164.2	192.05	155.31	204.27	186.87	-	-	-	-	-	-	gi|646717608|gb|KDR20399.1|/0/Protein extra bases [Zootermopsis nevadensis]
Btabaci_GLEAN_10004630	BTA012466.2,novel_T007798	167.61	186.08	150.49	159.31	227.11	173.57	248.54	237.32	-	-	ko03013//RNA transport;ko03015//mRNA surveillance pathway;ko03018//RNA degradation	-	-	-	gi|501299508|dbj|BAN21498.1|/0/polyadenylate-binding protein, partial [Riptortus pedestris]
Btabaci_GLEAN_10022026	BTA007425.1,novel_T004793,novel_T004794,novel_T004795	167.35	183.77	148.47	148.38	177.58	117.81	187.68	165.15	-	-	ko01100//Metabolic pathways;ko01212//Fatty acid metabolism;ko00280//Valine, leucine and isoleucine degradation;ko00071//Fatty acid degradation;ko00062//Fatty acid elongation	-	-	-	gi|662207989|ref|XP_008477522.1|/0/PREDICTED: 3-ketoacyl-CoA thiolase, mitochondrial isoform X1 [Diaphorina citri]
Btabaci_GLEAN_10018127	BTA019766.1,novel_T011906	167.31	97.46	139.43	107.97	115.27	101.06	93.79	141.31	-	-	-	-	-	-	gi|506968437|gb|AGM32562.1|/5.21761e-20/hypothetical protein [Coptotermes formosanus]
Btabaci_GLEAN_10010898	BTA001657.1,novel_T001047,novel_T001048	167.25	129.51	208.95	182.19	166.04	311.02	188.22	241.52	-	-	ko01100//Metabolic pathways;ko00790//Folate biosynthesis	-	-	-	gi|641674355|ref|XP_008186655.1|/0/PREDICTED: membrane-bound alkaline phosphatase-like isoform X2 [Acyrthosiphon pisum]
Btabaci_GLEAN_10008129	BTA006238.2,novel_T003945	167.12	194.39	158.62	143.04	159.24	181.41	156.64	169.41	-	-	-	-	-	-	gi|861650838|gb|KMQ97454.1|/3.0782e-128/ubiquinone biosynthesis protein mitochondrial [Lasius niger]
Btabaci_GLEAN_10022314	BTA006458.1,novel_T004107	167.04	145.09	186.35	172.95	101.34	83.86	44.28	52.24	-	-	-	-	-	-	gi|646708585|gb|KDR14834.1|/2.33352e-36/Putative defense protein Hdd11-like [Zootermopsis nevadensis]
Btabaci_GLEAN_10010553	BTA002215.1,novel_T001439	166.85	128.57	228.56	202.41	119.67	72.23	109.06	110.25	-	-	ko04721//Synaptic vesicle cycle	GO:0005829//cytosol;GO:0005886//plasma membrane;GO:0016021//integral component of membrane;GO:0030672//synaptic vesicle membrane	GO:0005509//calcium ion binding;GO:0005544//calcium-dependent phospholipid binding;GO:0019905//syntaxin binding;GO:0030276//clathrin binding	GO:0006906//vesicle fusion;GO:0017158//regulation of calcium ion-dependent exocytosis;GO:0048488//synaptic vesicle endocytosis;GO:0048791//calcium ion-regulated exocytosis of neurotransmitter	gi|939271313|ref|XP_014255913.1|/0/PREDICTED: synaptotagmin 1 isoform X1 [Cimex lectularius]
Btabaci_GLEAN_10012524	BTA029434.1,novel_T017734,novel_T017735	165.76	174.32	185.21	176.32	219.42	239.17	176.06	249.13	-	-	ko04514//Cell adhesion molecules (CAMs);ko04360//Axon guidance;ko05020//Prion diseases	-	-	-	gi|242020475|ref|XP_002430679.1|/2.32757e-56/Neural/ectodermal development factor IMP-L2 precursor, putative [Pediculus humanus corporis]
Btabaci_GLEAN_10003334	BTA015085.1,novel_T009462	165.58	151.57	167.3	207.84	163.12	214.05	175.49	203.15	-	-	ko05146//Amoebiasis;ko05110//Vibrio cholerae infection	-	-	-	gi|56283929|ref|NP_523475.3|/4.63682e-20/salivary gland secretion 1 [Drosophila melanogaster]
Btabaci_GLEAN_10018403	BTA018899.1,novel_T011349,novel_T011350	165.58	126.12	200.92	192.71	164.82	283.34	141.89	199.3	-	-	ko05231//Choline metabolism in cancer	-	-	-	gi|939279887|ref|XP_014260540.1|/4.58787e-148/PREDICTED: organic cation transporter protein isoform X3 [Cimex lectularius]
Btabaci_GLEAN_10017092	BTA022042.1,novel_T013509,novel_T013510,novel_T013511,novel_T013512,novel_T013513	165.15	156.28	175.47	195.14	171.56	179.8	158.41	176.18	-	-	-	-	-	-	gi|846926177|gb|AKN21241.1|/8.64004e-18/allatostatin-A precursor [Locusta migratoria]
Btabaci_GLEAN_10007473	BTA007336.2,novel_T004696	165.01	165.59	163.99	169.68	152.17	237.39	176.5	194.73	-	-	ko05200//Pathways in cancer;ko04141//Protein processing in endoplasmic reticulum;ko04120//Ubiquitin mediated proteolysis;ko04310//Wnt signaling pathway;ko04110//Cell cycle;ko04114//Oocyte meiosis;ko04066//HIF-1 signaling pathway;ko03420//Nucleotide excision repair;ko05211//Renal cell carcinoma;ko04350//TGF-beta signaling pathway;ko04710//Circadian rhythm	-	GO:0008270//zinc ion binding	-	gi|817186840|ref|XP_012287940.1|/5.60588e-66/PREDICTED: RING-box protein 1A [Orussus abietinus]
Btabaci_GLEAN_10005409	BTA010962.1,novel_T006918	164.89	218	166.81	160.81	204.33	240.22	215.87	235.87	-	-	-	-	-	-	gi|646717219|gb|KDR20165.1|/2.78289e-86/Chromobox protein-like protein 5, partial [Zootermopsis nevadensis]
Btabaci_GLEAN_10024173	BTA028748.2,novel_T017195,novel_T017196,novel_T017197	164.78	398.36	210.74	242.37	1381.44	1135.85	1688.8	1436.4	-	-	ko05146//Amoebiasis;ko05110//Vibrio cholerae infection	-	-	-	gi|642933263|ref|XP_008197349.1|/4.85915e-129/PREDICTED: hexamerin 4 isoform X1 [Tribolium castaneum]
Btabaci_GLEAN_10022353	BTA006291.1	164.11	325.8	127.47	134.85	317.75	354.38	388.57	340.21	-	-	ko03010//Ribosome	-	-	-	gi|264667439|gb|ACY71305.1|/2.45455e-61/ribosomal protein S10 [Chrysomela tremula]
Btabaci_GLEAN_10003774	BTA014184.1,novel_T008954	164.04	157.73	120.17	158.58	147.16	298.88	136.02	236.53	-	-	-	-	-	-	-
Btabaci_GLEAN_10017324	BTA021513.1	163.97	146.51	155.95	177.63	146.55	107.9	138.14	128.74	-	-	-	-	-	-	gi|339896245|gb|AEK21808.1|/0/cytochrome P450 [Bemisia tabaci]
Btabaci_GLEAN_10012713	BTA029040.1	163.5	55.85	131.89	204.46	204.7	198.94	163.79	265.99	-	-	ko05169//Epstein-Barr virus infection;ko04144//Endocytosis;ko03040//Spliceosome;ko04141//Protein processing in endoplasmic reticulum;ko04010//MAPK signaling pathway;ko05145//Toxoplasmosis;ko05164//Influenza A;ko04612//Antigen processing and presentation;ko04915//Estrogen signaling pathway;ko05134//Legionellosis;ko05020//Prion diseases;ko05162//Measles	-	-	-	gi|308097853|gb|ADO14473.1|/0/hsp70 [Bemisia tabaci]
Btabaci_GLEAN_10022020	BTA007421.1,novel_T004786,novel_T004787,novel_T004788,novel_T004789,novel_T004790,novel_T004791,novel_T004792	163.24	179.08	138.13	138.22	180.57	130.61	162.38	139.34	-	-	-	-	-	-	gi|939272174|ref|XP_014256369.1|/5.16174e-141/PREDICTED: uncharacterized protein LOC106670478 isoform X3 [Cimex lectularius]
Btabaci_GLEAN_10009955	BTA003209.1,novel_T002214	163.17	115.45	193.25	204.01	111.46	104.54	84.39	94.11	-	-	-	-	-	-	gi|939632344|ref|XP_014284604.1|/0/PREDICTED: thrombospondin type-1 domain-containing protein 7A-like [Halyomorpha halys]
CUFF119.457.1	BTA029254.1,novel_T017582	162.72	135.78	199.76	201.39	140	166.14	120.02	149.72	-	-	ko01100//Metabolic pathways;ko00280//Valine, leucine and isoleucine degradation;ko00250//Alanine, aspartate and glutamate metabolism;ko04727//GABAergic synapse;ko00640//Propanoate metabolism;ko00650//Butanoate metabolism;ko00410//beta-Alanine metabolism	GO:0005739//mitochondrion	GO:0003867//4-aminobutyrate transaminase activity;GO:0030170//pyridoxal phosphate binding;GO:0042802//identical protein binding	GO:0009450//gamma-aminobutyric acid catabolic process	gi|646699271|gb|KDR09977.1|/0/4-aminobutyrate aminotransferase, mitochondrial [Zootermopsis nevadensis]
Btabaci_GLEAN_10006574	BTA008899.1,novel_T005632	162.43	101.64	240.28	196.53	94.23	108.53	68.29	84.99	-	-	ko04745//Phototransduction - fly	-	-	-	gi|972178577|ref|XP_015191376.1|/0/PREDICTED: arrestin homolog [Polistes dominula]
Btabaci_GLEAN_10027183	BTA009065.1,novel_T005735	161.27	110.07	272.64	251.95	106.25	134.44	90.24	122.47	-	-	ko01100//Metabolic pathways;ko00040//Pentose and glucuronate interconversions;ko00051//Fructose and mannose metabolism	-	-	-	gi|768425857|ref|XP_011553950.1|/4.76875e-29/PREDICTED: xylose isomerase-like [Plutella xylostella]
Btabaci_GLEAN_10011886	BTA000233.1,novel_T000244	160.87	232	141.74	117.76	226.97	232.29	258.38	246.47	-	-	-	-	-	-	gi|968042127|ref|XP_002008867.2|/3.98707e-08/uncharacterized protein Dmoj_GI11576 [Drosophila mojavensis]
Btabaci_GLEAN_10027090	BTA014798.1,novel_T009317	160.82	223.47	89.19	123.71	210.49	158.01	265.9	233.09	-	-	ko01100//Metabolic pathways;ko00040//Pentose and glucuronate interconversions;ko00051//Fructose and mannose metabolism	-	GO:0008270//zinc ion binding;GO:0016491//oxidoreductase activity	GO:0055114//oxidation-reduction process	gi|13096215|pdb|1E3J|A/0/Chain A, Ketose Reductase (Sorbitol Dehydrogenase) From Silverleaf Whitefly
Btabaci_GLEAN_10016383	BTA023288.2,novel_T014167	160.46	187.93	146.53	149.19	163.17	205.66	160.3	164.8	-	-	ko05146//Amoebiasis;ko05110//Vibrio cholerae infection	-	-	-	gi|985394914|ref|XP_015364879.1|/7.61518e-36/PREDICTED: putative mediator of RNA polymerase II transcription subunit 26 [Diuraphis noxia]
Btabaci_GLEAN_10013148	BTA028364.1,novel_T016900,novel_T016901	160.18	124.6	194.28	201.48	103.77	72.03	83.78	91.97	-	-	ko04919//Thyroid hormone signaling pathway;ko04024//cAMP signaling pathway;ko04022//cGMP-PKG signaling pathway;ko04974//Protein digestion and absorption;ko04976//Bile secretion;ko04970//Salivary secretion;ko04261//Adrenergic signaling in cardiomyocytes;ko04972//Pancreatic secretion;ko04971//Gastric acid secretion;ko04978//Mineral absorption;ko04911//Insulin secretion;ko04918//Thyroid hormone synt…	GO:0005890//sodium:potassium-exchanging ATPase complex	-	GO:0006813//potassium ion transport;GO:0006814//sodium ion transport	gi|968055221|ref|XP_015020565.1|/4.01253e-145/uncharacterized protein Dmoj_GI17298, isoform B [Drosophila mojavensis]
Btabaci_GLEAN_10001538	BTA019619.1,novel_T011842,novel_T011843	159.85	133.21	176.34	175.18	167.59	191.74	196.41	197.79	-	-	-	-	-	-	gi|91084741|ref|XP_971031.1|/1.31901e-107/PREDICTED: apolipoprotein D [Tribolium castaneum]
Btabaci_GLEAN_10005164	BTA011445.1,novel_T007248,novel_T007249,novel_T007250,novel_T007251	159.5	124.17	174.93	182.78	130.59	129.4	123.01	134.35	-	-	ko01212//Fatty acid metabolism;ko01040//Biosynthesis of unsaturated fatty acids	-	-	-	gi|225709748|gb|ACO10720.1|/2.28421e-22/Omega-3 fatty acid desaturase, endoplasmic reticulum [Caligus rogercresseyi]
Btabaci_GLEAN_10013902	BTA027320.1,novel_T016401	159.04	192.73	125.84	123.17	152.94	168.38	136.31	158.19	-	-	ko01100//Metabolic pathways;ko05016//Huntington's disease;ko05010//Alzheimer's disease;ko05012//Parkinson's disease;ko00190//Oxidative phosphorylation;ko04932//Non-alcoholic fatty liver disease (NAFLD)	-	-	-	gi|907607738|ref|XP_013113135.1|/3.64078e-112/PREDICTED: NADH-ubiquinone oxidoreductase subunit 8 [Stomoxys calcitrans]
Btabaci_GLEAN_10014745	BTA026118.1,novel_T015593,novel_T015594,novel_T015595	158.95	183.53	146.72	152.86	156.39	146.61	139.9	145.42	-	-	ko01100//Metabolic pathways;ko01200//Carbon metabolism;ko00260//Glycine, serine and threonine metabolism;ko00620//Pyruvate metabolism;ko00010//Glycolysis / Gluconeogenesis;ko00280//Valine, leucine and isoleucine degradation;ko00630//Glyoxylate and dicarboxylate metabolism;ko00020//Citrate cycle (TCA cycle);ko00640//Propanoate metabolism	-	GO:0016668//oxidoreductase activity, acting on a sulfur group of donors, NAD(P) as acceptor	GO:0044699	gi|328705771|ref|XP_001948247.2|/0/PREDICTED: dihydrolipoyl dehydrogenase, mitochondrial [Acyrthosiphon pisum]
Btabaci_GLEAN_10011724	BTA000480.1,novel_T000402	158.52	151	132	125.9	135.29	163.42	147.17	154.99	-	-	-	-	-	-	gi|506968795|gb|AGM32741.1|/2.78978e-94/mitochondrial import inner membrane translocase subunit Tim17-B-like protein [Coptotermes formosanus]
Btabaci_GLEAN_10023273	BTA002582.1,novel_T001724	158.5	119.01	106	148.89	121.38	202.71	93	116.67	-	-	ko01100//Metabolic pathways;ko00500//Starch and sucrose metabolism;ko00052//Galactose metabolism	-	-	-	gi|646685191|gb|KDR03832.1|/2.25922e-153/Maltase 1, partial [Zootermopsis nevadensis]
Btabaci_GLEAN_10018862	BTA018184.1,novel_T011165	158.38	183.06	132.61	129.55	176.18	189.77	159.07	185.18	-	-	-	-	-	-	gi|939639385|ref|XP_014270610.1|/1.85039e-73/PREDICTED: INO80 complex subunit D-like [Halyomorpha halys]
Btabaci_GLEAN_10025052	BTA022490.1,novel_T013741,novel_T013742,novel_T013743,novel_T013744,novel_T013745	158.13	141.02	161.01	175.75	143.62	175.88	158.96	164.97	-	-	-	-	-	-	gi|939672977|ref|XP_014282884.1|/0/PREDICTED: glutamate-gated chloride channel isoform X9 [Halyomorpha halys]
Btabaci_GLEAN_10014568	BTA026441.1	157.35	172.59	211.91	214.47	119.86	82.15	134.67	138.96	-	-	ko01100//Metabolic pathways;ko05110//Vibrio cholerae infection;ko04142//Lysosome;ko04145//Phagosome;ko00190//Oxidative phosphorylation;ko05152//Tuberculosis;ko04721//Synaptic vesicle cycle;ko05323//Rheumatoid arthritis;ko05120//Epithelial cell signaling in Helicobacter pylori infection;ko04966//Collecting duct acid secretion	GO:0005774//vacuolar membrane;GO:0016021//integral component of membrane;GO:0033179//proton-transporting V-type ATPase, V0 domain	GO:0015078//hydrogen ion transmembrane transporter activity	GO:0015991//ATP hydrolysis coupled proton transport	gi|914097337|ref|NP_001298605.1|/9.58167e-94/V-type proton ATPase 16 kDa proteolipid subunit [Papilio polytes]
Btabaci_GLEAN_10004497	BTA012717.1,novel_T007914,novel_T007915,novel_T007916,novel_T007917,novel_T007918	156.77	108.01	175.36	175.17	121.53	104.73	121.75	127.26	-	-	ko01100//Metabolic pathways;ko00230//Purine metabolism;ko05169//Epstein-Barr virus infection;ko05016//Huntington's disease;ko00240//Pyrimidine metabolism;ko05168//Herpes simplex infection;ko03020//RNA polymerase	-	-	-	gi|939636970|ref|XP_014294416.1|/0/PREDICTED: MAP kinase-activating death domain protein isoform X11 [Halyomorpha halys]
Btabaci_GLEAN_10015264	BTA025329.1,novel_T015176	155.63	157.72	2.61	178.57	29.13	153.13	136.92	133.67	-	-	ko01100//Metabolic pathways;ko00450//Selenocompound metabolism	-	-	-	gi|749755300|ref|XP_011140125.1|/0/PREDICTED: LOW QUALITY PROTEIN: selenide, water dikinase [Harpegnathos saltator]
Btabaci_GLEAN_10009502	BTA004030.1,novel_T002821	155.43	168.58	137.64	129.69	157.78	188.3	132.4	173.39	-	-	-	GO:0005743//mitochondrial inner membrane;GO:0016021//integral component of membrane	-	-	gi|332376981|gb|AEE63630.1|/8.14825e-23/unknown [Dendroctonus ponderosae]
Btabaci_GLEAN_10014717	BTA026191.1,novel_T015639	155.16	184.53	150.66	152.89	145.39	126.88	146.25	139.42	-	-	ko05146//Amoebiasis;ko04144//Endocytosis;ko04145//Phagosome;ko05132//Salmonella infection;ko05152//Tuberculosis	-	-	-	gi|646465805|gb|KDQ65243.1|/2.133e-115/Ras-related protein Rab-7a [Zootermopsis nevadensis]
Btabaci_GLEAN_10011772	BTA000396.1	154.81	114.5	200.17	192.38	99.97	67.91	92.16	119.62	-	-	ko01100//Metabolic pathways;ko00510//N-Glycan biosynthesis	-	-	-	gi|662209761|ref|XP_008478494.1|/3.8659e-126/PREDICTED: BTB/POZ domain-containing protein KCTD12 [Diaphorina citri]
Btabaci_GLEAN_10012758	BTA029003.1	154.81	114.5	200.17	192.38	99.97	67.91	92.16	119.62	-	-	ko01100//Metabolic pathways;ko00510//N-Glycan biosynthesis	-	-	-	gi|662209761|ref|XP_008478494.1|/3.8659e-126/PREDICTED: BTB/POZ domain-containing protein KCTD12 [Diaphorina citri]
Btabaci_GLEAN_10011718	BTA000474.1	154.56	140.99	188.04	183.58	125.38	91.27	108.48	144.17	-	-	ko01100//Metabolic pathways;ko05110//Vibrio cholerae infection;ko04142//Lysosome;ko04145//Phagosome;ko00190//Oxidative phosphorylation;ko05152//Tuberculosis;ko04721//Synaptic vesicle cycle;ko05323//Rheumatoid arthritis;ko05120//Epithelial cell signaling in Helicobacter pylori infection	GO:0000220//vacuolar proton-transporting V-type ATPase, V0 domain;GO:0016021//integral component of membrane	GO:0046961//proton-transporting ATPase activity, rotational mechanism	GO:0007035//vacuolar acidification;GO:0015991//ATP hydrolysis coupled proton transport	gi|662201276|ref|XP_008473888.1|/4.63154e-104/PREDICTED: V-type proton ATPase 21 kDa proteolipid subunit [Diaphorina citri]
Btabaci_GLEAN_10010141	BTA002924.1,novel_T001950,novel_T001951,novel_T001952,novel_T001953	154.42	111.96	188.22	170.22	118.1	111.88	106.1	124.77	-	-	-	-	GO:0016787//hydrolase activity;GO:0097159//organic cyclic compound binding;GO:1901363//heterocyclic compound binding	-	gi|1000766344|ref|XP_015606294.1|/0/PREDICTED: ATP-dependent RNA helicase DDX54 [Cephus cinctus]
Btabaci_GLEAN_10023741	BTA000408.1	154.03	195.66	128.87	119.46	182.4	215.7	174.96	206.12	-	-	ko01100//Metabolic pathways;ko05016//Huntington's disease;ko05010//Alzheimer's disease;ko05012//Parkinson's disease;ko00190//Oxidative phosphorylation;ko04932//Non-alcoholic fatty liver disease (NAFLD)	-	-	-	gi|665805551|ref|XP_008550974.1|/1.03723e-49/PREDICTED: NADH dehydrogenase [ubiquinone] iron-sulfur protein 6, mitochondrial [Microplitis demolitor]
Btabaci_GLEAN_10025482	BTA018475.1,novel_T011194	153.97	141.17	184.57	174.45	128.7	148.33	118.48	129.58	-	-	ko01100//Metabolic pathways;ko05110//Vibrio cholerae infection;ko04142//Lysosome;ko04145//Phagosome;ko00190//Oxidative phosphorylation;ko05152//Tuberculosis;ko04721//Synaptic vesicle cycle;ko05323//Rheumatoid arthritis;ko05120//Epithelial cell signaling in Helicobacter pylori infection;ko04966//Collecting duct acid secretion	-	-	-	gi|193636530|ref|XP_001951582.1|/5.34948e-23/PREDICTED: V-type proton ATPase 116 kDa subunit a isoform 1-like isoform X4 [Acyrthosiphon pisum]
Btabaci_GLEAN_10017668	BTA020855.1,novel_T012707,novel_T012708	153.82	157.15	158.69	154.49	156.43	142.68	139.81	160.46	-	-	-	-	-	-	gi|646720913|gb|KDR22486.1|/2.31643e-46/hypothetical protein L798_02285 [Zootermopsis nevadensis]
Btabaci_GLEAN_10025031	BTA022726.1,novel_T013867	153.75	171.08	119.32	116.05	139.68	146.27	116.43	127.99	-	-	ko01100//Metabolic pathways;ko05016//Huntington's disease;ko05010//Alzheimer's disease;ko05012//Parkinson's disease;ko00190//Oxidative phosphorylation;ko04932//Non-alcoholic fatty liver disease (NAFLD)	-	GO:0016491//oxidoreductase activity;GO:0046872//metal ion binding;GO:0051537//2 iron, 2 sulfur cluster binding	GO:0055114//oxidation-reduction process	gi|985419078|ref|XP_015375030.1|/2.55155e-121/PREDICTED: probable NADH dehydrogenase [ubiquinone] flavoprotein 2, mitochondrial [Diuraphis noxia]
Btabaci_GLEAN_10018293	BTA019189.1,novel_T011550,novel_T011551	153.64	159.17	166.39	149.3	147.12	140.12	118.22	122.15	-	-	ko04320//Dorso-ventral axis formation	-	-	-	gi|1000206515|gb|KXJ77415.1|/7.80789e-17/hypothetical protein RP20_CCG007672 [Aedes albopictus]
Btabaci_GLEAN_10010362	BTA002547.1,novel_T001710	153.35	125.07	139.77	181.7	114.9	83.06	120.49	119.98	-	-	ko05200//Pathways in cancer;ko04919//Thyroid hormone signaling pathway;ko05166//HTLV-I infection;ko04976//Bile secretion;ko04931//Insulin resistance;ko04066//HIF-1 signaling pathway;ko04922//Glucagon signaling pathway;ko05230//Central carbon metabolism in cancer;ko04911//Insulin secretion;ko05211//Renal cell carcinoma;ko04920//Adipocytokine signaling pathway	GO:0016021//integral component of membrane	GO:0022891//substrate-specific transmembrane transporter activity	GO:0008643//carbohydrate transport;GO:0055085//transmembrane transport	gi|646720362|gb|KDR22120.1|/0/Solute carrier family 2, facilitated glucose transporter member 1 [Zootermopsis nevadensis]
Btabaci_GLEAN_10012852	BTA028838.1,novel_T017230,novel_T017231	153.14	129.69	197.84	177.89	117.21	108.2	102.11	132.89	-	-	ko04974//Protein digestion and absorption	GO:0016020//membrane	-	-	gi|242009721|ref|XP_002425631.1|/0/amino acid transporter, putative [Pediculus humanus corporis]
CUFF113.618.3	BTA027709.2,novel_T016723,novel_T016724,novel_T016725	152.82	104.9	187.78	163.72	144.59	258.47	131.95	176.04	-	-	-	-	-	-	-
Btabaci_GLEAN_10020050	BTA014532.1,novel_T009154,novel_T009155,novel_T009156	152.67	145.42	154.13	140.97	112.36	52.96	83.44	97.78	-	-	ko05146//Amoebiasis;ko04810//Regulation of actin cytoskeleton;ko04510//Focal adhesion;ko04520//Adherens junction;ko05203//Viral carcinogenesis;ko04670//Leukocyte transendothelial migration;ko05412//Arrhythmogenic right ventricular cardiomyopathy (ARVC);ko04530//Tight junction;ko05322//Systemic lupus erythematosus	-	-	-	gi|939672212|ref|XP_014282635.1|/0/PREDICTED: alpha-actinin, sarcomeric isoform X3 [Halyomorpha halys]
Btabaci_GLEAN_10003910	BTA013908.1	151.99	150.53	172.59	161.17	107.34	101.76	116.48	111.28	-	-	-	-	-	-	gi|662216760|ref|XP_008482330.1|/1.10833e-131/PREDICTED: facilitated trehalose transporter Tret1-like isoform X1 [Diaphorina citri]
Btabaci_GLEAN_10025619	BTA016718.1,novel_T010433	151.55	204.3	153.85	153.28	204.64	196.89	253.01	236.34	-	-	ko04145//Phagosome;ko05130//Pathogenic Escherichia coli infection;ko04540//Gap junction	-	-	-	gi|930662959|gb|KPJ04585.1|/0/Tubulin alpha chain [Papilio xuthus]
Btabaci_GLEAN_10017647	BTA020899.2,novel_T012767,novel_T012768,novel_T012769,novel_T012770,novel_T012771,novel_T012772,novel_T012773	151.38	140.66	168.63	160.05	135.34	142.97	120.65	139.82	-	-	ko01100//Metabolic pathways;ko05110//Vibrio cholerae infection;ko04142//Lysosome;ko04145//Phagosome;ko05203//Viral carcinogenesis;ko00190//Oxidative phosphorylation;ko05152//Tuberculosis;ko04721//Synaptic vesicle cycle;ko05323//Rheumatoid arthritis;ko05120//Epithelial cell signaling in Helicobacter pylori infection;ko04966//Collecting duct acid secretion	GO:0033179//proton-transporting V-type ATPase, V0 domain	GO:0015078//hydrogen ion transmembrane transporter activity	GO:0015991//ATP hydrolysis coupled proton transport	gi|401757801|gb|AFQ00928.1|/0/V-ATPase subunit D [Locusta migratoria]
Btabaci_GLEAN_10026806	BTA026284.1,novel_T015701,novel_T015702,novel_T015703	151.24	150.49	184.92	181.46	156.73	106.76	140.81	155.98	-	-	ko04152//AMPK signaling pathway;ko04932//Non-alcoholic fatty liver disease (NAFLD);ko04920//Adipocytokine signaling pathway	-	-	-	gi|970886203|ref|XP_015127837.1|/0/PREDICTED: adiponectin receptor protein isoform X1 [Diachasma alloeum]
Btabaci_GLEAN_10018013	BTA020102.1,novel_T012183,novel_T012184	151.17	152.08	142.62	148.02	151.3	82.19	166.46	136.92	-	-	-	-	-	-	gi|817072716|ref|XP_012258471.1|/1.36558e-61/PREDICTED: plasminogen activator inhibitor 1 RNA-binding protein-like isoform X4 [Athalia rosae]
Btabaci_GLEAN_10003882	BTA013968.1	149.59	141.88	174.4	187.76	126.11	93.18	106.7	121	-	-	ko01100//Metabolic pathways;ko05110//Vibrio cholerae infection;ko04145//Phagosome;ko00190//Oxidative phosphorylation;ko04721//Synaptic vesicle cycle;ko05323//Rheumatoid arthritis;ko05120//Epithelial cell signaling in Helicobacter pylori infection;ko04966//Collecting duct acid secretion	GO:0033180//proton-transporting V-type ATPase, V1 domain	GO:0005524//ATP binding;GO:0016820//hydrolase activity, acting on acid anhydrides, catalyzing transmembrane movement of substances	GO:0015991//ATP hydrolysis coupled proton transport;GO:0046034//ATP metabolic process	gi|756558251|gb|AJM13638.1|/1.16565e-111/V-ATPase holoenzyme subunit B [Frankliniella occidentalis]
Btabaci_GLEAN_10019682	BTA015915.1	149.41	128.16	117.02	142.93	140.22	188.78	122.9	175.26	-	-	-	-	-	-	-
Btabaci_GLEAN_10023747	BTA000414.1	149.09	136.03	119.94	154.81	125.14	167.63	128.8	182.01	-	-	-	-	GO:0016787//hydrolase activity	-	gi|572262821|ref|XP_006609648.1|/1.1325e-107/PREDICTED: venom serine carboxypeptidase-like [Apis dorsata]
Btabaci_GLEAN_10014222	BTA026920.1,novel_T016157	148.96	109.77	196.52	146.11	114.8	118.52	109.2	156.5	-	-	-	-	-	-	gi|808035081|gb|AKC92815.1|/9.80049e-16/allatotropin precursor [Schistocerca gregaria]
Btabaci_GLEAN_10018915	BTA018038.1,novel_T011124,novel_T011125	148.91	168.28	142.21	125.47	179.11	206.56	176.69	209.54	-	-	ko04141//Protein processing in endoplasmic reticulum;ko05134//Legionellosis	GO:0005783//endoplasmic reticulum;GO:0005794//Golgi apparatus	GO:0005525//GTP binding	GO:0006886//intracellular protein transport;GO:0016192//vesicle-mediated transport	gi|242024491|ref|XP_002432661.1|/3.64265e-100/GTP-binding protein SAR1B, putative [Pediculus humanus corporis]
Btabaci_GLEAN_10003808	BTA014119.1,novel_T008920,novel_T008921	148.59	184.72	135.23	130.68	188.36	275.78	182.46	253.53	-	-	-	-	GO:0003755//peptidyl-prolyl cis-trans isomerase activity	GO:0000413//protein peptidyl-prolyl isomerization;GO:0006457//protein folding	gi|646706121|gb|KDR13508.1|/7.19092e-96/Peptidyl-prolyl cis-trans isomerase B [Zootermopsis nevadensis]
Btabaci_GLEAN_10026943	BTA022463.1,novel_T013712	148.47	148.67	143.4	160.26	138.25	162.08	137.01	189.62	-	-	-	-	-	-	gi|159459914|gb|ABW96354.1|/2.9922e-85/aquaporin 1 [Bemisia tabaci]
Btabaci_GLEAN_10025170	BTA021317.1,novel_T013030	148.07	110.31	177.05	165.56	120.65	157.88	104.24	130.6	-	-	-	-	-	-	gi|939670487|ref|XP_014282012.1|/3.71719e-25/PREDICTED: uncharacterized protein LOC106684437 [Halyomorpha halys]
Btabaci_GLEAN_10025795	BTA014840.1	148.05	141.05	124.69	118.94	133.07	104.66	96.78	114.41	-	-	ko01100//Metabolic pathways;ko01200//Carbon metabolism;ko01230//Biosynthesis of amino acids;ko04146//Peroxisome;ko00480//Glutathione metabolism;ko00020//Citrate cycle (TCA cycle);ko05230//Central carbon metabolism in cancer;ko01210//2-Oxocarboxylic acid metabolism	-	GO:0000287//magnesium ion binding;GO:0004450//isocitrate dehydrogenase (NADP+) activity;GO:0051287//NAD binding	GO:0006099//tricarboxylic acid cycle;GO:0006102//isocitrate metabolic process	gi|939242114|ref|XP_014240316.1|/0/PREDICTED: isocitrate dehydrogenase [NADP] cytoplasmic-like isoform X3 [Cimex lectularius]
Btabaci_GLEAN_10025712	BTA015820.1,novel_T009966	147.63	117.94	207.52	209.27	103.17	82.48	85.17	109.1	-	-	-	-	-	-	gi|766930323|ref|XP_011497296.1|/1.79709e-95/PREDICTED: synaptogyrin-2 [Ceratosolen solmsi marchali]
Btabaci_GLEAN_10016752	BTA022641.1	147.42	182.43	144.51	145.51	141.51	67.87	113.81	114.27	-	-	ko01100//Metabolic pathways;ko00330//Arginine and proline metabolism	-	-	-	gi|985418160|ref|XP_015374524.1|/0/PREDICTED: proline dehydrogenase 1, mitochondrial isoform X1 [Diuraphis noxia]
Btabaci_GLEAN_10025164	BTA021573.1,novel_T013254	147.23	269.97	115.9	118.48	240.08	289.34	245.22	229.58	-	-	ko03010//Ribosome	GO:0022627//cytosolic small ribosomal subunit	GO:0003735//structural constituent of ribosome	GO:0006412//translation	gi|646710612|gb|KDR16079.1|/4.35701e-142/40S ribosomal protein S3a [Zootermopsis nevadensis]
Btabaci_GLEAN_10014029	BTA027152.1,novel_T016323	147.12	127.72	158.42	150.9	142.68	137.2	142.68	181.51	-	-	ko04810//Regulation of actin cytoskeleton;ko04510//Focal adhesion;ko04611//Platelet activation;ko04670//Leukocyte transendothelial migration;ko04530//Tight junction	-	-	-	gi|939645400|ref|XP_014272691.1|/7.54119e-121/PREDICTED: myosin regulatory light chain sqh [Halyomorpha halys]
Btabaci_GLEAN_10022261	BTA006640.1,novel_T004238	147.02	101.5	185.44	191.95	95.05	67.98	80.22	89.17	-	-	ko00910//Nitrogen metabolism	-	-	-	gi|662217887|ref|XP_008482946.1|/1.83307e-45/PREDICTED: carbonic anhydrase 2 [Diaphorina citri]
Btabaci_GLEAN_10016742	BTA022664.1	146.27	148.48	113.96	107.74	133.14	168.9	130.98	143.23	-	-	ko01100//Metabolic pathways;ko05016//Huntington's disease;ko05010//Alzheimer's disease;ko05012//Parkinson's disease;ko00190//Oxidative phosphorylation;ko04932//Non-alcoholic fatty liver disease (NAFLD)	GO:0016020//membrane	-	-	gi|506968323|gb|AGM32505.1|/2.4756e-67/putative NADH: ubiquinone dehydrogenase [Coptotermes formosanus]
Btabaci_GLEAN_10022126	BTA007201.3,novel_T004646,novel_T004647,novel_T004648	145.54	136.57	157.45	142.52	155.07	194.55	133.34	145.93	-	-	-	-	-	-	gi|987391111|gb|AMD82868.1|/5.20214e-55/odorant-binding protein 8 [Bemisia tabaci]
Btabaci_GLEAN_10015734	BTA024455.1,novel_T014613	145.33	97.88	132.09	169.15	119.2	119.13	131.05	145.49	-	-	-	-	-	-	gi|939242439|ref|XP_014240486.1|/2.21026e-21/PREDICTED: uncharacterized protein LOC106661533 [Cimex lectularius]
Btabaci_GLEAN_10012566	BTA029339.1	143.75	96.94	124.53	133.99	105.28	68.98	99.78	114.28	-	-	-	-	-	-	gi|646704397|gb|KDR12600.1|/1.72545e-61/Mitochondrial import receptor subunit TOM20-like protein [Zootermopsis nevadensis]
Btabaci_GLEAN_10027224	BTA000038.1,novel_T000066,novel_T000067	143.19	144.29	175.24	168.23	111.93	86.08	108.98	110.68	-	-	-	-	-	-	gi|805827271|ref|XP_012153476.1|/2.22482e-110/PREDICTED: ras-related protein Rab-32 isoform X5 [Megachile rotundata]
Btabaci_GLEAN_10013321	BTA028186.3,novel_T016866,novel_T016867,novel_T016868,novel_T016869	143.06	122.62	163.4	144.46	105.04	88.38	93.34	108.23	-	-	-	-	-	-	gi|572266184|ref|XP_006611209.1|/1.39995e-159/PREDICTED: monocarboxylate transporter 12-B-like, partial [Apis dorsata]
Btabaci_GLEAN_10024993	BTA022918.1,novel_T013940,novel_T013941	142.69	125.31	106.49	108.56	108.48	72.08	95.85	92.88	-	-	ko01100//Metabolic pathways;ko01200//Carbon metabolism;ko00310//Lysine degradation;ko00380//Tryptophan metabolism;ko00020//Citrate cycle (TCA cycle)	-	-	-	gi|925669824|gb|KOX67894.1|/0/2-oxoglutarate dehydrogenase, mitochondrial [Melipona quadrifasciata]
Btabaci_GLEAN_10026255	BTA006898.1,novel_T004378,novel_T004379,novel_T004380	142.27	172.9	127.16	117.74	183.33	109.49	179.23	146.23	-	-	ko01100//Metabolic pathways;ko01200//Carbon metabolism;ko01230//Biosynthesis of amino acids;ko00620//Pyruvate metabolism;ko00020//Citrate cycle (TCA cycle)	-	-	-	gi|998495154|ref|XP_015523225.1|/0/PREDICTED: pyruvate carboxylase, mitochondrial isoform X2 [Neodiprion lecontei]
Btabaci_GLEAN_10024362	BTA027388.3,novel_T016456,novel_T016457,novel_T016458,novel_T016459,novel_T016460,novel_T016461	142.12	132.41	152.07	146.3	132.4	136.9	121.35	125.37	-	-	ko04146//Peroxisome	-	-	-	gi|795077097|ref|XP_011876557.1|/1.54302e-154/PREDICTED: 2-hydroxyacyl-CoA lyase 1 [Vollenhovia emeryi]
Btabaci_GLEAN_10016416	BTA023236.1,novel_T014143	141.83	115.28	167.69	180.12	144.13	221.95	127.87	154.01	-	-	-	GO:0005576//extracellular region	-	-	gi|998499245|ref|XP_015509502.1|/1.47873e-28/PREDICTED: prohormone-1-like, partial [Neodiprion lecontei]
Btabaci_GLEAN_10024293	BTA027711.1	141.7	136.23	136.79	129.06	121.18	127.88	108.75	122.06	-	-	-	-	-	-	gi|939632083|ref|XP_014283775.1|/0/PREDICTED: protein FAM73B [Halyomorpha halys]
Btabaci_GLEAN_10009712	BTA003652.1,novel_T002535	141.1	180.03	127.12	118.66	217.79	253.2	165.16	262.74	-	-	-	-	-	-	gi|608795888|gb|AHW57400.1|/3.69225e-16/OBP1 [Bemisia tabaci]
Btabaci_GLEAN_10005204	BTA011363.1,novel_T007155,novel_T007156	140.94	152.56	147.9	152.28	139.39	103.43	146.52	123.65	-	-	ko01100//Metabolic pathways;ko05110//Vibrio cholerae infection;ko04145//Phagosome;ko00190//Oxidative phosphorylation;ko04721//Synaptic vesicle cycle;ko05323//Rheumatoid arthritis;ko05120//Epithelial cell signaling in Helicobacter pylori infection;ko04966//Collecting duct acid secretion	-	-	-	gi|970919090|ref|XP_015126221.1|/0/PREDICTED: V-type proton ATPase catalytic subunit A [Diachasma alloeum]
Btabaci_GLEAN_10020308	BTA013700.1,novel_T008630	140.79	56	144.22	158.67	47.24	27.12	20.54	12.47	-	-	ko01100//Metabolic pathways;ko00230//Purine metabolism;ko05169//Epstein-Barr virus infection;ko05016//Huntington's disease;ko00240//Pyrimidine metabolism;ko05168//Herpes simplex infection;ko03020//RNA polymerase	-	-	-	gi|198461966|ref|XP_002135725.1|/1.25376e-74/uncharacterized protein Dpse_GA23225 [Drosophila pseudoobscura pseudoobscura]
Btabaci_GLEAN_10023874	BTA030026.2,novel_T018042	139.71	134.33	163.53	151.67	118.31	128.28	103.05	127.55	-	-	-	-	-	-	gi|90819962|gb|ABD98738.1|/1.29797e-29/putative ribonuclease [Graphocephala atropunctata]
Btabaci_GLEAN_10025726	BTA015836.1,novel_T009979	139.58	123.16	150.85	167.1	125.27	147.37	118.15	130.24	-	-	ko04962//Vasopressin-regulated water reabsorption	-	-	-	gi|939683764|ref|XP_014286513.1|/1.68784e-16/PREDICTED: dynein light chain 1, cytoplasmic [Halyomorpha halys]
Btabaci_GLEAN_10015737	BTA024459.1	139.24	225.25	101.25	117.44	247.82	308.24	281.34	299.91	-	-	ko03010//Ribosome	GO:0015934//large ribosomal subunit	GO:0003735//structural constituent of ribosome	GO:0006412//translation	gi|646716223|gb|KDR19552.1|/2.19003e-100/60S ribosomal protein L17 [Zootermopsis nevadensis]
Btabaci_GLEAN_10006467	BTA009161.1	139.24	225.25	101.25	117.44	247.82	308.24	281.34	299.91	-	-	ko03010//Ribosome	GO:0015934//large ribosomal subunit	GO:0003735//structural constituent of ribosome	GO:0006412//translation	gi|646716223|gb|KDR19552.1|/2.19003e-100/60S ribosomal protein L17 [Zootermopsis nevadensis]
Btabaci_GLEAN_10010607	BTA002126.1,novel_T001391	138.75	136.77	136.86	150.47	88.36	47.18	70.06	65.54	-	-	ko01100//Metabolic pathways;ko01200//Carbon metabolism;ko00620//Pyruvate metabolism;ko03320//PPAR signaling pathway	-	GO:0004471//malate dehydrogenase (decarboxylating) (NAD+) activity;GO:0046872//metal ion binding;GO:0051287//NAD binding	GO:0006108//malate metabolic process;GO:0055114//oxidation-reduction process	gi|646663160|gb|KDQ87031.1|/0/NADP-dependent malic enzyme [Zootermopsis nevadensis]
CUFF57.430.1	BTA013757.1,novel_T008670,novel_T008671	138.75	108.91	169.24	168.06	145.65	210.65	141.46	149.65	-	-	-	-	-	-	gi|25090166|sp|Q8T0W8.1|DIAP_GASAT/3.57551e-06/RecName: Full=Diapause-specific peptide; Short=DSP; AltName: Full=Diapausin; Flags: Precursor
Btabaci_GLEAN_10002230	BTA017480.1	138.7	87.9	200.8	211.55	33.97	17.88	1.41	1.37	-	-	ko01100//Metabolic pathways;ko00230//Purine metabolism;ko05169//Epstein-Barr virus infection;ko05016//Huntington's disease;ko00240//Pyrimidine metabolism;ko05168//Herpes simplex infection;ko03020//RNA polymerase	GO:0016020//membrane	-	-	gi|646722719|gb|KDR23626.1|/1.338e-58/Cuticle protein 19 [Zootermopsis nevadensis]
Btabaci_GLEAN_10016681	BTA022771.1	138.66	175.84	79.68	102.96	248.74	239.47	232.11	177.61	-	-	ko03010//Ribosome	-	-	-	gi|559373032|gb|AHB12474.1|/1.21334e-88/60S Ribosomal Protein L27A [Pantala flavescens]
Btabaci_GLEAN_10011882	BTA000227.1	138.55	132.14	151.05	174.24	123.14	91.15	115.98	136.17	-	-	-	GO:0016020//membrane	-	-	gi|662193939|ref|XP_008469897.1|/3.514e-86/PREDICTED: aquaporin AQPAe.a [Diaphorina citri]
Btabaci_GLEAN_10017547	BTA021113.2,novel_T012918,novel_T012919	138.42	205.5	127.51	118.44	254.57	276.28	302.7	257.27	-	-	ko03010//Ribosome	GO:0030529//intracellular ribonucleoprotein complex	-	-	gi|189240524|ref|XP_971875.2|/3.27189e-175/PREDICTED: 60S ribosomal protein L3 [Tribolium castaneum]
Btabaci_GLEAN_10026785	BTA026259.1,novel_T015690	138.4	134.56	133.88	144.13	157.23	151.35	169.66	155.55	-	-	-	-	-	-	gi|939279319|ref|XP_014260235.1|/4.3338e-56/PREDICTED: protein tyrosine phosphatase type IVA 1 [Cimex lectularius]
Btabaci_GLEAN_10022896	BTA004014.1,novel_T002811	138.13	139.34	130.23	128.05	153.07	204.45	112.3	184.53	-	-	ko04080//Neuroactive ligand-receptor interaction;ko04024//cAMP signaling pathway;ko04020//Calcium signaling pathway;ko04726//Serotonergic synapse	GO:0016021//integral component of membrane	GO:0004715//non-membrane spanning protein tyrosine kinase activity;GO:0004930//G-protein coupled receptor activity	GO:0007186//G-protein coupled receptor signaling pathway;GO:0018108//peptidyl-tyrosine phosphorylation	gi|939236302|ref|XP_014255138.1|/4.6121e-139/PREDICTED: octopamine receptor beta-3R-like [Cimex lectularius]
Btabaci_GLEAN_10026938	BTA022458.1	137.7	158.36	116.72	102.37	199.24	109.23	137.16	146.67	-	-	-	-	-	-	gi|193690866|ref|XP_001947253.1|/6.75893e-72/PREDICTED: uncharacterized protein LOC100164229 [Acyrthosiphon pisum]
Btabaci_GLEAN_10012620	BTA029279.1,novel_T017613	137.56	106.63	147.94	135.19	95.21	74.4	88.71	116.88	-	-	-	-	-	-	gi|549129994|dbj|BAO00945.1|/4.87136e-32/CRF-related diuretic hormone 45 [Nilaparvata lugens]
Btabaci_GLEAN_10015028	BTA025660.1,novel_T015341	137.46	101.19	124.96	154.03	122.2	103.2	159.82	169.36	-	-	-	-	-	-	gi|817086920|ref|XP_012266211.1|/9.30688e-72/PREDICTED: BAG domain-containing protein Samui isoform X2 [Athalia rosae]
Btabaci_GLEAN_10019967	BTA014711.1,novel_T009251,novel_T009252	137.21	183.84	86.99	94.94	100.81	77.56	76.75	76.89	-	-	ko01100//Metabolic pathways;ko05200//Pathways in cancer;ko01200//Carbon metabolism;ko00620//Pyruvate metabolism;ko00020//Citrate cycle (TCA cycle);ko05211//Renal cell carcinoma	GO:0045239//tricarboxylic acid cycle enzyme complex	GO:0004333//fumarate hydratase activity	GO:0006099//tricarboxylic acid cycle;GO:0006106//fumarate metabolic process	gi|939246122|ref|XP_014242459.1|/0/PREDICTED: fumarate hydratase, mitochondrial-like isoform X2 [Cimex lectularius]
Btabaci_GLEAN_10018904	BTA018072.2,novel_T011147	137.07	207.27	138.55	147.41	204.01	213.22	246.94	209.43	-	-	ko05169//Epstein-Barr virus infection;ko04144//Endocytosis;ko03040//Spliceosome;ko04141//Protein processing in endoplasmic reticulum;ko04010//MAPK signaling pathway;ko05145//Toxoplasmosis;ko05164//Influenza A;ko04612//Antigen processing and presentation;ko04915//Estrogen signaling pathway;ko05134//Legionellosis;ko05020//Prion diseases;ko05162//Measles	-	-	-	gi|662196058|ref|XP_008471042.1|/3.63568e-42/PREDICTED: heat shock 70 kDa protein cognate 4-like [Diaphorina citri]
Btabaci_GLEAN_10025412	BTA019495.1	137.05	19.91	95.04	140.04	214.71	330.41	175.99	326.36	-	-	ko05169//Epstein-Barr virus infection;ko04144//Endocytosis;ko03040//Spliceosome;ko04141//Protein processing in endoplasmic reticulum;ko04010//MAPK signaling pathway;ko05145//Toxoplasmosis;ko05164//Influenza A;ko04612//Antigen processing and presentation;ko04915//Estrogen signaling pathway;ko05134//Legionellosis;ko05020//Prion diseases;ko05162//Measles	-	-	-	gi|295393290|gb|ADG03465.1|/0/heat shock protein 70 [Bemisia tabaci]
Btabaci_GLEAN_10026292	BTA006025.1,novel_T003898	136.36	77.2	114.49	92.93	58.81	104.88	30.16	32.44	-	-	-	-	-	-	-
Btabaci_GLEAN_10001014	BTA021314.1	136.08	90.59	138.15	131.64	68.72	23.35	66.13	78.64	-	-	ko01100//Metabolic pathways;ko00230//Purine metabolism;ko05169//Epstein-Barr virus infection;ko05016//Huntington's disease;ko00240//Pyrimidine metabolism;ko05168//Herpes simplex infection;ko03020//RNA polymerase	-	-	-	gi|646709209|gb|KDR15190.1|/1.11996e-64/Protein unzipped [Zootermopsis nevadensis]
Btabaci_GLEAN_10019668	BTA015898.1,novel_T010011	135.98	439.55	13.31	52.64	234.43	219.15	287.48	242.21	-	-	ko04142//Lysosome;ko04612//Antigen processing and presentation;ko04924//Renin secretion	-	-	-	gi|939250038|ref|XP_014244566.1|/2.05149e-108/PREDICTED: cathepsin B-like [Cimex lectularius]
CUFF36.186.3	BTA008551.3,novel_T005496,novel_T005497	135.92	113.25	194.12	164.95	127.46	161.62	125.62	151.84	-	-	-	-	-	-	gi|498953551|ref|XP_004523519.1|/0/PREDICTED: membrane metallo-endopeptidase-like 1 [Ceratitis capitata]
Btabaci_GLEAN_10022683	BTA004760.1,novel_T003250,novel_T003251	135.79	125.69	107.85	130.75	107.26	138.06	113.25	115.62	-	-	ko01100//Metabolic pathways	-	-	-	gi|939651017|ref|XP_014274633.1|/5.38214e-121/PREDICTED: peroxiredoxin-6-like isoform X1 [Halyomorpha halys]
CUFF46.524.1	BTA010980.1	135.76	194.49	106.82	100.36	211.56	269.79	263.46	279.38	-	-	ko03010//Ribosome	GO:0005622//intracellular	-	-	gi|193613146|ref|XP_001943756.1|/6.18785e-25/PREDICTED: 60S ribosomal protein L29 [Acyrthosiphon pisum]
Btabaci_GLEAN_10011085	BTA001454.1,novel_T000934,novel_T000935,novel_T000936	135.75	109.49	159.62	175.66	103.59	126.45	90.28	100.52	-	-	ko03013//RNA transport;ko03015//mRNA surveillance pathway	-	-	-	gi|964136394|ref|XP_001956936.2|/1.77081e-17/uncharacterized protein Dana_GF24314 [Drosophila ananassae]
Btabaci_GLEAN_10009770	BTA003553.1,novel_T002449	135.3	167.47	116.82	129.6	173.16	214.21	163.4	175.16	-	-	ko03320//PPAR signaling pathway	-	-	-	gi|501293180|dbj|BAN20568.1|/2.06111e-41/diazepam binding inhibitor, putative [Riptortus pedestris]
Btabaci_GLEAN_10026903	BTA022423.1,novel_T013669,novel_T013670,novel_T013671	135.14	107.59	152.2	127.06	154.46	237.63	126.6	191.88	-	-	-	-	-	-	-
CUFF25.542.2	BTA005945.1	135.08	87.03	171.91	172.85	127.19	287.34	103.51	205.58	-	-	-	-	-	-	gi|549129988|dbj|BAO00942.1|/5.84731e-13/cchamide 1 [Nilaparvata lugens]
Btabaci_GLEAN_10022679	BTA004756.1,novel_T003248	134.31	98.98	131.4	130.97	110.54	83.01	113.48	131.9	-	-	-	-	-	-	gi|646715019|gb|KDR18775.1|/1.70893e-94/hypothetical protein L798_06455 [Zootermopsis nevadensis]
Btabaci_GLEAN_10004963	BTA011843.1	134.16	157.56	118.01	116.61	121.11	87.97	101.96	104.98	-	-	ko01100//Metabolic pathways;ko05016//Huntington's disease;ko05010//Alzheimer's disease;ko05012//Parkinson's disease;ko00190//Oxidative phosphorylation;ko04932//Non-alcoholic fatty liver disease (NAFLD)	-	-	-	gi|646719115|gb|KDR21345.1|/0/NADH-ubiquinone oxidoreductase 75 kDa subunit, mitochondrial [Zootermopsis nevadensis]
Btabaci_GLEAN_10018998	BTA017819.1,novel_T011032	133.62	93.44	171.53	158.47	126.56	114.95	105.93	120.53	-	-	ko01100//Metabolic pathways;ko05146//Amoebiasis;ko05016//Huntington's disease;ko05200//Pathways in cancer;ko04015//Rap1 signaling pathway;ko04062//Chemokine signaling pathway;ko04919//Thyroid hormone signaling pathway;ko05010//Alzheimer's disease;ko04611//Platelet activation;ko04022//cGMP-PKG signaling pathway;ko04072//Phospholipase D signaling pathway;ko04020//Calcium signaling pathway;ko04310//…	-	GO:0008081//phosphoric diester hydrolase activity	GO:0006629//lipid metabolic process;GO:0007165//signal transduction	gi|328724634|ref|XP_001948241.2|/0/PREDICTED: 1-phosphatidylinositol 4,5-bisphosphate phosphodiesterase isoform X2 [Acyrthosiphon pisum]
Btabaci_GLEAN_10012342	BTA029692.1	133.45	111.32	104.25	127.01	94.58	199.09	86.92	143.03	-	-	-	-	-	-	gi|998520220|ref|XP_015521078.1|/4.40724e-06/PREDICTED: uncharacterized protein LOC107225209 [Neodiprion lecontei]
Btabaci_GLEAN_10023119	BTA003081.2,novel_T002072	132.72	79.64	171.66	179.96	89.7	141.69	67.2	113.3	-	-	ko04727//GABAergic synapse	GO:0016020//membrane	GO:0015293//symporter activity	GO:0006810//transport	gi|242004431|ref|XP_002423092.1|/0/sodium-dependent nutrient amino acid transporter, putative [Pediculus humanus corporis]
Btabaci_GLEAN_10009270	BTA004410.2,novel_T003027	132.09	124.6	98.19	130.83	146.4	207.19	131.1	180.52	-	-	ko01100//Metabolic pathways;ko00500//Starch and sucrose metabolism;ko00052//Galactose metabolism	-	-	-	gi|607365917|gb|EZA60093.1|/0/Alpha-glucosidase, partial [Cerapachys biroi]
Btabaci_GLEAN_10027134	BTA009017.1,novel_T005691	132.06	112.8	145.39	146.36	111.5	73.57	85.44	115.14	-	-	ko04142//Lysosome	-	-	-	gi|939269450|ref|XP_014254906.1|/8.6327e-48/PREDICTED: lysosomal-associated transmembrane protein 4A isoform X3 [Cimex lectularius]
Btabaci_GLEAN_10017646	BTA020898.1,novel_T012762,novel_T012763,novel_T012764,novel_T012765,novel_T012766	131.95	129.59	158.28	128.32	118.02	127.35	122.45	136.4	-	-	-	-	-	-	gi|954578497|ref|XP_014613754.1|/0/PREDICTED: RNA-binding protein 39 isoform X2 [Polistes canadensis]
Btabaci_GLEAN_10017138	BTA021952.1,novel_T013448	131.61	93.47	162.18	152.17	109.68	186.38	101.3	125.16	-	-	ko04740//Olfactory transduction	-	-	-	gi|939636256|ref|XP_014294152.1|/0/PREDICTED: sodium/potassium/calcium exchanger 4-like isoform X2 [Halyomorpha halys]
Btabaci_GLEAN_10008931	BTA004935.1,novel_T003328	131.56	60.68	149.16	181.62	45.47	12	6.72	6.41	-	-	ko05414//Dilated cardiomyopathy;ko05410//Hypertrophic cardiomyopathy (HCM)	-	-	-	gi|646718620|gb|KDR21032.1|/1.38165e-106/Neurofilament heavy polypeptide [Zootermopsis nevadensis]
Btabaci_GLEAN_10010134	BTA002951.1	131.32	167.99	98.09	115.63	147	358.3	162.2	281.41	-	-	-	-	-	-	-
Btabaci_GLEAN_10021601	BTA008909.1,novel_T005638,novel_T005639,novel_T005640	131.3	105.02	148.98	168.18	107.2	87.45	99.77	100.38	-	-	-	-	-	-	gi|820866039|ref|XP_003698962.2|/1.68619e-121/PREDICTED: transcription factor CP2-like protein 1 isoform X2 [Apis florea]
Btabaci_GLEAN_10017402	BTA021400.1	130.96	79.09	165.64	139.39	71.09	81.4	64.26	97.66	-	-	ko04745//Phototransduction - fly	-	-	-	gi|357623479|gb|EHJ74610.1|/1.06809e-22/putative myosin [Danaus plexippus]
Btabaci_GLEAN_10016004	BTA023928.1,novel_T014422	130.87	79.65	114.33	134.59	87.38	86.67	136.43	113.12	-	-	-	-	-	-	gi|939240234|ref|XP_014239342.1|/2.8288e-62/PREDICTED: mid1-interacting protein 1-B isoform X2 [Cimex lectularius]
Btabaci_GLEAN_10023503	BTA001711.1,novel_T001075,novel_T001076,novel_T001077	130.65	134.35	131.45	137.64	142.24	161.96	134.78	173.46	-	-	-	-	-	-	gi|939654546|ref|XP_014275903.1|/4.38424e-132/PREDICTED: protein yellow-like isoform X1 [Halyomorpha halys]
Btabaci_GLEAN_10004952	BTA011851.1	130.53	170.31	69.37	86.72	146.07	200.86	178.25	114.97	-	-	ko03010//Ribosome	GO:0005622//intracellular	-	-	gi|157116671|ref|XP_001652827.1|/1.65907e-79/AAEL007699-PA [Aedes aegypti]
Btabaci_GLEAN_10021946	BTA007770.1,novel_T005002	130.34	124.64	129.28	113.85	122.73	161.1	118.23	125.34	-	-	ko04270//Vascular smooth muscle contraction;ko04921//Oxytocin signaling pathway	-	GO:0005509//calcium ion binding	-	gi|939674040|ref|XP_014283267.1|/4.72532e-95/PREDICTED: myosin-2 essential light chain isoform X2 [Halyomorpha halys]
Btabaci_GLEAN_10022227	BTA006698.2,novel_T004273,novel_T004274	130.17	199.06	96.31	95.84	222.34	276.49	237.29	243.74	-	-	ko03010//Ribosome	-	-	-	gi|480310429|gb|AGJ76543.1|/1.23493e-75/ribosomal protein L32, partial [Bemisia tabaci]
Btabaci_GLEAN_10022422	BTA005870.1,novel_T003793	129.88	156.88	129.87	137.96	219.03	185.46	193.16	195.53	-	-	ko04142//Lysosome;ko04978//Mineral absorption	-	-	-	gi|939644129|ref|XP_014272244.1|/1.13022e-28/PREDICTED: protein takeout-like [Halyomorpha halys]
CUFF50.242.1	BTA011822.1,novel_T007437,novel_T007438	129.69	104	127.78	121.76	103.74	80.68	100.6	91.95	-	-	-	-	-	-	gi|16152118|gb|AAL14979.1|AF418571_1/2.90619e-103/reverse transcriptase [Drosophila virilis]
Btabaci_GLEAN_10026924	BTA022445.1,novel_T013699,novel_T013700,novel_T013701,novel_T013702	129.28	103.35	168.81	148.72	118.5	101.49	126.42	137.73	-	-	-	-	-	-	gi|328708788|ref|XP_001946148.2|/8.13923e-117/PREDICTED: glycine-rich cell wall structural protein 1.8-like [Acyrthosiphon pisum]
Btabaci_GLEAN_10005743	BTA010417.1,novel_T006567	129.2	147.55	79.94	96.59	150.05	96.98	121.31	108.36	-	-	ko05166//HTLV-I infection;ko05203//Viral carcinogenesis;ko04390//Hippo signaling pathway;ko04391//Hippo signaling pathway - fly;ko04660//T cell receptor signaling pathway	-	-	-	gi|328709525|ref|XP_003243984.1|/4.15217e-33/PREDICTED: PDZ and LIM domain protein 2-like [Acyrthosiphon pisum]
Btabaci_GLEAN_10005291	BTA011242.1,novel_T007087	128.75	134.38	135.33	123.48	185.73	182.55	183.11	204.18	-	-	ko01100//Metabolic pathways;ko00564//Glycerophospholipid metabolism	-	-	-	gi|646698022|gb|KDR09398.1|/0/Alanine--glyoxylate aminotransferase 2-like, partial [Zootermopsis nevadensis]
Btabaci_GLEAN_10024443	BTA026713.1,novel_T015983,novel_T015984	128.49	131.77	128.56	133.62	143.21	273.24	124.56	186.91	-	-	ko05100//Bacterial invasion of epithelial cells	-	-	-	gi|969475347|ref|XP_002099230.2|/6.25864e-09/uncharacterized protein Dyak_GE23484 [Drosophila yakuba]
CUFF42.149.1	BTA009862.1,novel_T006246	128.07	175.04	80.97	74.6	101.14	87.8	83.14	84.13	-	-	ko01100//Metabolic pathways;ko01200//Carbon metabolism;ko00620//Pyruvate metabolism;ko00010//Glycolysis / Gluconeogenesis;ko04066//HIF-1 signaling pathway;ko04922//Glucagon signaling pathway;ko00020//Citrate cycle (TCA cycle);ko05230//Central carbon metabolism in cancer	-	-	-	gi|936681373|ref|XP_014237709.1|/0/PREDICTED: probable pyruvate dehydrogenase E1 component subunit alpha, mitochondrial isoform X1 [Trichogramma pretiosum]
Btabaci_GLEAN_10025463	BTA019064.1	127.99	154.6	90.88	93.32	162.75	179.91	189.82	183.85	-	-	-	-	-	-	gi|939278135|ref|XP_014259599.1|/1.85153e-100/PREDICTED: protein slowmo [Cimex lectularius]
Btabaci_GLEAN_10014609	BTA026397.2,novel_T015797,novel_T015798,novel_T015799,novel_T015800	127.43	99.75	152.5	145.87	119.61	159.62	151.97	162.92	-	-	-	-	-	-	gi|939246750|ref|XP_014242795.1|/2.51395e-160/PREDICTED: uncharacterized protein LOC106662876 [Cimex lectularius]
Btabaci_GLEAN_10013786	BTA027636.1,novel_T016649	127.31	134.64	130.08	123.86	117.19	113	97.27	104.69	-	-	-	GO:0016020//membrane	-	-	gi|665820352|ref|XP_008559072.1|/2.2808e-73/PREDICTED: receptor expression-enhancing protein 5 [Microplitis demolitor]
Btabaci_GLEAN_10010500	BTA002298.1	127.23	130.7	113.38	134.29	123.54	252.57	129.62	188.81	-	-	-	-	-	-	-
CUFF62.185.1	BTA014901.1	126.94	121.97	147.22	90.96	99.64	77.64	110.64	115.03	-	-	ko05168//Herpes simplex infection;ko03040//Spliceosome	-	-	-	gi|766917426|ref|XP_011505688.1|/1.57811e-59/PREDICTED: serine-arginine protein 55 isoform X10 [Ceratosolen solmsi marchali]
Btabaci_GLEAN_10010689	BTA002011.1,novel_T001314,novel_T001315,novel_T001316,novel_T001317,novel_T001318,novel_T001319,novel_T001320,novel_T001321,novel_T001322,novel_T001323,novel_T001324	126.82	158.77	138.72	145.36	151	183.91	143.61	135.92	-	-	ko01100//Metabolic pathways;ko00230//Purine metabolism;ko00240//Pyrimidine metabolism;ko00760//Nicotinate and nicotinamide metabolism	-	-	-	gi|817077405|ref|XP_012261028.1|/2.3521e-150/PREDICTED: protein 5NUC-like isoform X1 [Athalia rosae]
Btabaci_GLEAN_10024502	BTA026332.2,novel_T015785	126.66	126.09	130.9	156.06	169.84	319.69	146.4	228.82	-	-	ko04970//Salivary secretion	-	-	-	gi|968077620|ref|XP_015033279.1|/3.59976e-12/uncharacterized protein Dwil_GK12379 [Drosophila willistoni]
Btabaci_GLEAN_10019337	BTA016916.1,novel_T010536	125.7	215.64	103.3	95.94	233.02	138.95	261.34	209.32	-	-	ko01100//Metabolic pathways;ko01200//Carbon metabolism;ko01230//Biosynthesis of amino acids;ko00030//Pentose phosphate pathway	-	-	-	gi|780636318|ref|XP_011686754.1|/0/PREDICTED: transketolase-like protein 2 isoform X1 [Wasmannia auropunctata]
Btabaci_GLEAN_10023019	BTA003579.1	125.62	120.72	143.02	149.9	89.18	156.03	75.61	107.69	-	-	-	-	-	-	-
Btabaci_GLEAN_10018396	BTA018893.1,novel_T011340,novel_T011341,novel_T011342,novel_T011343	125.59	128.61	126.72	132.12	110.56	84.96	118.95	106.36	-	-	ko05203//Viral carcinogenesis;ko05161//Hepatitis B;ko04622//RIG-I-like receptor signaling pathway	-	-	-	gi|646701001|gb|KDR10924.1|/0/ATP-dependent RNA helicase DDX3X [Zootermopsis nevadensis]
Btabaci_GLEAN_10022930	BTA003825.1,novel_T002669	125.56	86.85	142.4	138.31	108.4	246.2	121.09	157.36	-	-	-	-	-	-	gi|998521196|ref|XP_015521613.1|/1.32059e-35/PREDICTED: uncharacterized protein LOC107225604 [Neodiprion lecontei]
Btabaci_GLEAN_10010070	BTA003045.1,novel_T002045	125.23	165.48	93.36	108.91	148.87	169.73	153.97	171.47	-	-	ko05203//Viral carcinogenesis	-	-	-	gi|501291169|dbj|BAN20313.1|/3.39053e-13/unkown protein [Riptortus pedestris]
Btabaci_GLEAN_10005918	BTA010085.1,novel_T006365,novel_T006366,novel_T006367,novel_T006368,novel_T006369,novel_T006370,novel_T006371,novel_T006372,novel_T006373	124.55	138.19	100.28	95.35	95.35	60.37	76.64	73.26	-	-	ko01100//Metabolic pathways;ko01200//Carbon metabolism;ko00020//Citrate cycle (TCA cycle);ko00640//Propanoate metabolism	-	GO:0000166//nucleotide binding;GO:0003824//catalytic activity;GO:0043167//ion binding	-	gi|501297758|dbj|BAN21224.1|/1.77648e-168/succinyl-coa synthetase beta chain [Riptortus pedestris]
Btabaci_GLEAN_10024860	BTA024051.1,novel_T014483	124.51	144.88	89.04	72.07	122.76	122.38	108.11	106.57	-	-	ko01100//Metabolic pathways;ko05016//Huntington's disease;ko05010//Alzheimer's disease;ko05012//Parkinson's disease;ko00190//Oxidative phosphorylation;ko04932//Non-alcoholic fatty liver disease (NAFLD)	-	-	-	gi|939280475|ref|XP_014260850.1|/6.65451e-104/PREDICTED: NADH dehydrogenase [ubiquinone] 1 alpha subcomplex subunit 10, mitochondrial [Cimex lectularius]
Btabaci_GLEAN_10018351	BTA019002.1,novel_T011429,novel_T011430	124.26	128.31	116.16	135.71	111.64	89.69	115.58	116.69	-	-	ko01100//Metabolic pathways;ko05231//Choline metabolism in cancer;ko00564//Glycerophospholipid metabolism	-	-	-	gi|646718827|gb|KDR21161.1|/0/Choline-phosphate cytidylyltransferase B [Zootermopsis nevadensis]
Btabaci_GLEAN_10013447	BTA028005.2,novel_T016756	124.21	123.49	86.63	89.68	113.28	122.07	104.41	109.54	-	-	-	-	GO:0009055//electron carrier activity	-	gi|114053151|ref|NP_001040123.1|/3.05099e-142/electron-transfer-flavoprotein beta polypeptide [Bombyx mori]
Btabaci_GLEAN_10001394	BTA020006.1	124.16	97.92	174.71	164.72	175.12	304.35	138.5	190.1	-	-	ko01100//Metabolic pathways;ko00250//Alanine, aspartate and glutamate metabolism;ko04727//GABAergic synapse;ko00650//Butanoate metabolism;ko00410//beta-Alanine metabolism;ko00430//Taurine and hypotaurine metabolism;ko04940//Type I diabetes mellitus	-	GO:0016831//carboxy-lyase activity;GO:0030170//pyridoxal phosphate binding	GO:0019752//carboxylic acid metabolic process	gi|939256776|ref|XP_014248186.1|/5.05735e-173/PREDICTED: cysteine sulfinic acid decarboxylase [Cimex lectularius]
Btabaci_GLEAN_10003827	BTA014072.1,novel_T008876,novel_T008877,novel_T008878,novel_T008879,novel_T008880	124.06	96.97	142.06	130.15	96.12	117.99	96.29	111.69	-	-	ko04144//Endocytosis	-	-	-	gi|939238860|ref|XP_014262129.1|/4.09658e-170/PREDICTED: endophilin-A isoform X1 [Cimex lectularius]
Btabaci_GLEAN_10020548	BTA012888.1,novel_T008036	123.92	97.03	137.75	147.62	112.76	115.94	122.64	127.96	-	-	-	-	-	-	gi|939658623|ref|XP_014277438.1|/1.05356e-108/PREDICTED: protein GDAP2 homolog isoform X2 [Halyomorpha halys]
Btabaci_GLEAN_10010552	BTA002214.2,novel_T001438	123.91	111.57	99.89	141.37	113.34	217.76	108.5	149.55	-	-	-	-	-	-	-
Btabaci_GLEAN_10022437	BTA005885.1	123.26	81.01	136.59	123.47	99.51	74.76	112.76	107.37	-	-	ko05146//Amoebiasis	-	-	-	gi|685506196|gb|AIO11228.1|/3.93109e-96/serpin [Hesperophylax occidentalis]
Btabaci_GLEAN_10026189	BTA008372.1,novel_T005393,novel_T005394	123.03	115.83	134.34	118.43	107.4	114.33	108.23	111.98	-	-	ko05200//Pathways in cancer;ko05205//Proteoglycans in cancer;ko04015//Rap1 signaling pathway;ko05100//Bacterial invasion of epithelial cells;ko04919//Thyroid hormone signaling pathway;ko04510//Focal adhesion;ko05130//Pathogenic Escherichia coli infection;ko05166//HTLV-I infection;ko04520//Adherens junction;ko04670//Leukocyte transendothelial migration;ko04390//Hippo signaling pathway;ko05412//Arr…	-	-	-	gi|37991668|dbj|BAD00045.1|/0/armadillo protein [Gryllus bimaculatus]
CUFF17.328.1	BTA003790.1,novel_T002627	122.93	181.79	89.94	97.78	197.38	242.47	228.65	206.11	-	-	ko03010//Ribosome	GO:0005840//ribosome	GO:0003735//structural constituent of ribosome;GO:0046872//metal ion binding	GO:0006412//translation	gi|662200471|ref|XP_008473447.1|/7.88888e-47/PREDICTED: 40S ribosomal protein S27 [Diaphorina citri]
Btabaci_GLEAN_10022406	BTA005947.1,novel_T003843	122.71	129.54	105.03	146.28	144.57	170.48	155.88	172.7	-	-	ko03018//RNA degradation;ko05152//Tuberculosis	-	GO:0005524//ATP binding;GO:0032440//2-alkenal reductase [NAD(P)] activity;GO:0051082//unfolded protein binding	GO:0006457//protein folding;GO:0055114//oxidation-reduction process	gi|91077414|ref|XP_975386.1|/0/PREDICTED: heat shock 70 kDa protein cognate 5 [Tribolium castaneum]
Btabaci_GLEAN_10014240	BTA026894.1,novel_T016135	122.07	194.72	110.45	100.49	188.7	276.86	212.46	212.91	-	-	ko03010//Ribosome	GO:0005840//ribosome	GO:0003735//structural constituent of ribosome	GO:0006412//translation	gi|985418544|ref|XP_015374734.1|/3.36202e-54/PREDICTED: 60S ribosomal protein L37a, partial [Diuraphis noxia]
Btabaci_GLEAN_10024751	BTA024813.1,novel_T014900	121.63	106.25	124.07	125.36	75.65	87.24	74.72	92.65	-	-	ko04614//Renin-angiotensin system	-	-	-	gi|646717341|gb|KDR20235.1|/1.24432e-68/Renin receptor [Zootermopsis nevadensis]
Btabaci_GLEAN_10023463	BTA001816.1,novel_T001147,novel_T001148,novel_T001149,novel_T001150,novel_T001151,novel_T001152,novel_T001153,novel_T001154,novel_T001155,novel_T001156,novel_T001157,novel_T001158,novel_T001159,novel_T001160,novel_T001161,novel_T001162,novel_T001163	121.5	110.39	119.46	140.44	120.65	111.53	124.21	121.33	-	-	-	GO:0016020//membrane	-	-	gi|930654854|gb|KPI97186.1|/5.02176e-157/Glutamate [NMDA] receptor-associated protein 1 [Papilio xuthus]
Btabaci_GLEAN_10018379	BTA018969.2,novel_T011396,novel_T011397,novel_T011398	120.89	108.7	134.14	131.18	116.78	124.41	111.34	118.59	-	-	ko01100//Metabolic pathways;ko04146//Peroxisome;ko03320//PPAR signaling pathway;ko00120//Primary bile acid biosynthesis	-	-	-	gi|501293550|dbj|BAN20618.1|/0/non-specific lipid-transfer protein-like [Riptortus pedestris]
Btabaci_GLEAN_10023687	BTA000900.1,novel_T000533,novel_T000534,novel_T000535,novel_T000536,novel_T000537	120.82	125.34	111.99	105.17	95.19	51.55	80.66	68.31	-	-	-	-	-	-	gi|939250411|ref|XP_014244766.1|/2.53155e-53/PREDICTED: serine/arginine repetitive matrix protein 1 isoform X1 [Cimex lectularius]
Btabaci_GLEAN_10002293	BTA017350.1	120.72	110.98	148.26	113.69	129.6	150.79	134.82	122.94	-	-	ko03040//Spliceosome	-	-	-	gi|662206994|ref|XP_008476978.1|/3.48771e-27/PREDICTED: TATA-binding protein-associated factor 2N-like [Diaphorina citri]
Btabaci_GLEAN_10024226	BTA028514.1,novel_T017011,novel_T017012,novel_T017013,novel_T017014,novel_T017015	120.69	131.45	119.81	121.85	119.77	92.25	100.61	105.02	-	-	ko04810//Regulation of actin cytoskeleton;ko05205//Proteoglycans in cancer;ko05100//Bacterial invasion of epithelial cells;ko04062//Chemokine signaling pathway;ko04510//Focal adhesion;ko05203//Viral carcinogenesis;ko04670//Leukocyte transendothelial migration;ko04370//VEGF signaling pathway	-	-	-	gi|328709648|ref|XP_003244023.1|/0/PREDICTED: paxillin-like isoform X6 [Acyrthosiphon pisum]
Btabaci_GLEAN_10004299	BTA013101.2,novel_T008220,novel_T008221,novel_T008222,novel_T008223,novel_T008224	120.58	120.48	115.97	113.75	109.7	101.24	143.54	120.36	-	-	ko05168//Herpes simplex infection;ko03022//Basal transcription factors	-	-	-	gi|939236152|ref|XP_014254362.1|/2.09946e-142/PREDICTED: uncharacterized protein LOC106669406 [Cimex lectularius]
Btabaci_GLEAN_10021561	BTA009188.1,novel_T005844,novel_T005845	120.37	104.34	120.88	124.18	138.82	119.97	115.22	128.56	-	-	ko04974//Protein digestion and absorption	GO:0016020//membrane	GO:0005488	-	gi|641650344|ref|XP_008189238.1|/6.40987e-92/PREDICTED: uncharacterized protein LOC100159152 isoform X2 [Acyrthosiphon pisum]
Btabaci_GLEAN_10003117	BTA015566.2,novel_T009800,novel_T009801	120.36	85.73	157.74	141.14	84.39	102.48	86.17	102.65	-	-	ko04145//Phagosome;ko05132//Salmonella infection;ko04962//Vasopressin-regulated water reabsorption	-	-	-	gi|646701755|gb|KDR11321.1|/0/Cytoplasmic dynein 1 light intermediate chain 2 [Zootermopsis nevadensis]
CUFF70.10.5	BTA016196.1,novel_T010138,novel_T010139,novel_T010140,novel_T010141	120.27	137.36	105.27	101.48	144.58	126.18	129.56	115.37	-	-	-	-	-	-	gi|646723508|gb|KDR24082.1|/5.06662e-38/Tropomodulin [Zootermopsis nevadensis]
Btabaci_GLEAN_10012831	BTA028886.1,novel_T017273,novel_T017274,novel_T017275,novel_T017276	120.12	97.22	175.69	174.07	91.8	86.87	84.36	92.65	-	-	-	-	-	-	gi|646703954|gb|KDR12364.1|/1.56831e-98/Synapse-associated protein 1 [Zootermopsis nevadensis]
Btabaci_GLEAN_10001853	BTA018595.1	119.87	106.78	101.86	114.34	81.87	84.84	62.03	80.38	-	-	ko01100//Metabolic pathways;ko00500//Starch and sucrose metabolism	-	-	-	gi|410718531|gb|AFV79626.1|/0/soluble trehalase [Bemisia tabaci]
Btabaci_GLEAN_10006335	BTA009394.1,novel_T005986	119.59	102.13	111.47	118.99	99.49	107.02	90.05	144.74	-	-	ko01100//Metabolic pathways;ko00500//Starch and sucrose metabolism	-	-	-	gi|410718531|gb|AFV79626.1|/2.39947e-158/soluble trehalase [Bemisia tabaci]
Btabaci_GLEAN_10012902	BTA028771.1,novel_T017208	119.3	98.05	104.98	123.89	184.89	164.5	201.08	194.09	-	-	-	-	GO:0008168//methyltransferase activity	GO:0008152//metabolic process	gi|662189393|ref|XP_008467421.1|/6.24378e-35/PREDICTED: putative methyltransferase DDB_G0268948 [Diaphorina citri]
Btabaci_GLEAN_10024733	BTA025030.1,novel_T015043,novel_T015044	118.82	143.65	105.89	113.57	166.31	167.21	210.06	180.85	-	-	ko05205//Proteoglycans in cancer;ko03040//Spliceosome;ko05202//Transcriptional misregulation in cancer	-	-	-	gi|345497627|ref|XP_001602045.2|/0/PREDICTED: ATP-dependent RNA helicase dbp2-like isoform X1 [Nasonia vitripennis]
Btabaci_GLEAN_10023128	BTA002975.1,novel_T001982,novel_T001983,novel_T001984	118.47	187.89	103.96	111.05	182.99	184.7	253.35	204.31	-	-	ko05200//Pathways in cancer;ko04151//PI3K-Akt signaling pathway;ko04141//Protein processing in endoplasmic reticulum;ko04612//Antigen processing and presentation;ko04915//Estrogen signaling pathway;ko04914//Progesterone-mediated oocyte maturation;ko05215//Prostate cancer;ko04621//NOD-like receptor signaling pathway	-	-	-	gi|70997669|gb|AAZ17403.1|/0/90 kDa heat shock protein [Bemisia tabaci]
Btabaci_GLEAN_10006908	BTA008317.1,novel_T005355,novel_T005356	118.46	107.61	133.63	127.71	93.16	88.59	84.7	95.21	-	-	ko01100//Metabolic pathways;ko05110//Vibrio cholerae infection;ko04142//Lysosome;ko04145//Phagosome;ko00190//Oxidative phosphorylation;ko05152//Tuberculosis;ko04721//Synaptic vesicle cycle;ko05323//Rheumatoid arthritis;ko05120//Epithelial cell signaling in Helicobacter pylori infection	-	-	-	gi|501293539|dbj|BAN20615.1|/0/vacuolar H[+] ATPase subunit [Riptortus pedestris]
Btabaci_GLEAN_10013028	BTA028579.1,novel_T017078	118.31	109.08	112.28	132.95	135.56	196.03	154.63	191.59	-	-	ko04141//Protein processing in endoplasmic reticulum	-	GO:0005524//ATP binding;GO:0031072//heat shock protein binding;GO:0046872//metal ion binding;GO:0051082//unfolded protein binding	GO:0006457//protein folding;GO:0009408//response to heat	gi|913318625|ref|XP_013190352.1|/0/PREDICTED: dnaJ homolog subfamily A member 1 [Amyelois transitella]
Btabaci_GLEAN_10008918	BTA004947.1	118.18	62.03	170.59	156.35	30.14	22.53	12.25	10.52	-	-	ko05146//Amoebiasis;ko05110//Vibrio cholerae infection	-	-	-	gi|939252212|ref|XP_014245734.1|/7.39755e-64/PREDICTED: larval cuticle protein A3A-like [Cimex lectularius]
Btabaci_GLEAN_10014664	BTA026248.1,novel_T015682	117.51	92.55	139.96	136.6	93.64	83.14	83.28	84.78	-	-	-	-	-	-	gi|939239161|ref|XP_014262292.1|/1.11697e-165/PREDICTED: testican-1 [Cimex lectularius]
Btabaci_GLEAN_10022982	BTA003667.1,novel_T002559	116.98	77.93	76.1	108.45	161.8	169.12	236.8	222.75	-	-	ko01100//Metabolic pathways;ko04151//PI3K-Akt signaling pathway;ko04910//Insulin signaling pathway;ko04152//AMPK signaling pathway;ko04931//Insulin resistance;ko00620//Pyruvate metabolism;ko00010//Glycolysis / Gluconeogenesis;ko04068//FoxO signaling pathway;ko04922//Glucagon signaling pathway;ko00020//Citrate cycle (TCA cycle);ko03320//PPAR signaling pathway;ko04920//Adipocytokine signaling pathw…	-	GO:0004613//phosphoenolpyruvate carboxykinase (GTP) activity;GO:0005525//GTP binding;GO:0016301//kinase activity	GO:0006094//gluconeogenesis;GO:0016310//phosphorylation	gi|537501292|emb|CDF66125.1|/0/phosphoenolpyruvate carboxykinase [Blattella germanica]
Btabaci_GLEAN_10020371	BTA013532.1	116.67	138.46	113.97	118.34	152.85	160.71	141.53	143.9	-	-	ko05168//Herpes simplex infection;ko04141//Protein processing in endoplasmic reticulum;ko04120//Ubiquitin mediated proteolysis;ko04310//Wnt signaling pathway;ko04110//Cell cycle;ko04114//Oocyte meiosis;ko04350//TGF-beta signaling pathway;ko04710//Circadian rhythm	-	GO:0016301//kinase activity	GO:0006511//ubiquitin-dependent protein catabolic process;GO:0016310//phosphorylation	gi|926636770|ref|XP_013784333.1|/1.38001e-108/PREDICTED: S-phase kinase-associated protein 1 [Limulus polyphemus]
Btabaci_GLEAN_10025417	BTA019500.1	116.57	133.82	116.25	110.88	139.05	121.33	151.71	142.67	-	-	ko04141//Protein processing in endoplasmic reticulum	-	GO:0005515//protein binding;GO:0043167//ion binding	-	gi|952511976|gb|KRT78784.1|/2.15067e-169/Chaperone, partial [Oryctes borbonicus]
Btabaci_GLEAN_10019699	BTA015757.1	115.67	138.11	119.66	109.99	142.48	166.84	136.11	143.66	-	-	-	-	-	-	gi|646706153|gb|KDR13531.1|/4.57546e-171/Putative mitochondrial inner membrane protein [Zootermopsis nevadensis]
Btabaci_GLEAN_10024169	BTA028744.1,novel_T017192	115.44	141.72	92.97	82.07	191.6	134.8	241.29	202.3	-	-	ko01100//Metabolic pathways;ko00020//Citrate cycle (TCA cycle)	-	-	-	gi|641655159|ref|XP_008179483.1|/0/PREDICTED: ATP citrate lyase isoform X1 [Acyrthosiphon pisum]
CUFF106.93.1	BTA025750.1,novel_T015392	115.21	32.5	54.73	1.67	32.07	90.64	37.66	1.23	-	-	-	-	-	-	-
Btabaci_GLEAN_10024587	BTA025872.1,novel_T015447,novel_T015448	115.06	171.12	89.54	76.08	121.74	128.54	158.87	117.38	-	-	-	-	-	-	gi|339896283|gb|AEK21827.1|/0/cytochrome P450 [Bemisia tabaci]
CUFF42.758.2	BTA010036.3,novel_T006344	115.05	91.11	93.02	114.74	111.78	226.63	118.23	171.39	-	-	ko05146//Amoebiasis;ko05110//Vibrio cholerae infection	-	-	-	gi|56283929|ref|NP_523475.3|/3.67116e-17/salivary gland secretion 1 [Drosophila melanogaster]
CUFF10.250.2	BTA002345.1,novel_T001534	114.91	95.97	138.08	101.72	150.93	205.45	146.16	175.77	-	-	-	-	-	-	-
Btabaci_GLEAN_10013965	BTA027230.3,novel_T016357,novel_T016358,novel_T016359	114.57	132.12	107.92	114.49	126.98	65.01	120.16	109.84	-	-	ko01100//Metabolic pathways;ko01230//Biosynthesis of amino acids;ko00270//Cysteine and methionine metabolism	-	-	-	gi|925680793|gb|KOX77579.1|/0/S-adenosylmethionine synthase isoform type-2 [Melipona quadrifasciata]
Btabaci_GLEAN_10008539	BTA005575.1,novel_T003630	114.25	76.57	138.71	136.98	81.45	48.91	74.43	79.15	-	-	ko04721//Synaptic vesicle cycle;ko04725//Cholinergic synapse	GO:0016021//integral component of membrane	GO:0015238//drug transmembrane transporter activity	GO:0006855//drug transmembrane transport	gi|939250639|ref|XP_014244887.1|/0/PREDICTED: vesicular acetylcholine transporter [Cimex lectularius]
Btabaci_GLEAN_10010071	BTA003046.3,novel_T002046,novel_T002047	114.11	134.42	119	113.92	140.37	137.88	143.62	158.1	-	-	ko04142//Lysosome;ko05152//Tuberculosis;ko04071//Sphingolipid signaling pathway	-	GO:0016787//hydrolase activity	-	gi|170063951|ref|XP_001867326.1|/1.85212e-148/lysosomal aspartic protease [Culex quinquefasciatus]
Btabaci_GLEAN_10021843	BTA008144.1,novel_T005279	114.06	91.33	115.15	136.99	107.02	96.14	120.28	136.45	-	-	ko05202//Transcriptional misregulation in cancer	-	-	-	gi|646688771|gb|KDR06414.1|/5.09495e-72/Myeloid leukemia factor [Zootermopsis nevadensis]
Btabaci_GLEAN_10017962	BTA020173.1	113.87	147.84	103.76	77.75	121.67	130.82	103.62	117.05	-	-	ko01100//Metabolic pathways;ko05016//Huntington's disease;ko05010//Alzheimer's disease;ko05012//Parkinson's disease;ko00190//Oxidative phosphorylation;ko04932//Non-alcoholic fatty liver disease (NAFLD)	-	-	-	gi|478259598|gb|ENN79451.1|/1.2522e-16/hypothetical protein YQE_04095, partial [Dendroctonus ponderosae]
Btabaci_GLEAN_10023541	BTA001432.1,novel_T000897,novel_T000898,novel_T000899	113.53	95.97	142.58	142.92	98.82	120.06	87.6	113.99	-	-	-	-	-	-	gi|646707895|gb|KDR14422.1|/1.99996e-139/Ninein-like protein [Zootermopsis nevadensis]
Btabaci_GLEAN_10014685	BTA026230.1,novel_T015659	112.92	98.67	105.28	120.23	96.15	174.27	101.72	128.32	-	-	ko04320//Dorso-ventral axis formation	-	-	-	gi|987913417|ref|XP_015432546.1|/7.79199e-45/PREDICTED: uncharacterized protein LOC107188718 [Dufourea novaeangliae]
Btabaci_GLEAN_10017839	BTA020430.1,novel_T012422,novel_T012423,novel_T012424	112.81	118.07	109.39	102.98	107.63	126.97	106.08	116.16	-	-	ko05169//Epstein-Barr virus infection;ko04151//PI3K-Akt signaling pathway;ko05203//Viral carcinogenesis;ko04390//Hippo signaling pathway;ko04391//Hippo signaling pathway - fly;ko04110//Cell cycle;ko04114//Oocyte meiosis;ko04722//Neurotrophin signaling pathway	-	-	-	gi|1009411255|gb|KYN30249.1|/1.5124e-122/14-3-3 protein zeta [Trachymyrmex cornetzi]
CUFF43.697.1	BTA010391.1	112.52	126.75	105.25	101	111.72	80.75	104.18	105.59	-	-	ko05012//Parkinson's disease	-	-	-	gi|641664128|ref|XP_008182900.1|/0/PREDICTED: serine/threonine-protein kinase PINK1, mitochondrial [Acyrthosiphon pisum]
CUFF1.122.1	BTA000057.1	112.52	126.75	105.25	101	111.72	80.75	104.18	105.59	-	-	ko05012//Parkinson's disease	-	-	-	gi|641664128|ref|XP_008182900.1|/0/PREDICTED: serine/threonine-protein kinase PINK1, mitochondrial [Acyrthosiphon pisum]
Btabaci_GLEAN_10014769	BTA026084.1,novel_T015588	112.26	93.25	133.75	120.48	80.51	99.89	87.76	96.65	-	-	ko04350//TGF-beta signaling pathway	-	-	-	gi|646715870|gb|KDR19330.1|/1.22232e-42/Protein extra-macrochaetae [Zootermopsis nevadensis]
Btabaci_GLEAN_10009366	BTA004266.1,novel_T002954	112.17	86.76	127.59	133.27	88.85	45.82	60.29	75.59	-	-	ko04974//Protein digestion and absorption	-	-	-	gi|328715506|ref|XP_001945852.2|/0/PREDICTED: proton-coupled amino acid transporter 2-like [Acyrthosiphon pisum]
Btabaci_GLEAN_10009830	BTA003478.1	111.78	224.05	55.38	59.92	212.39	86.86	250.23	195.52	-	-	ko01100//Metabolic pathways;ko00500//Starch and sucrose metabolism;ko04910//Insulin signaling pathway;ko04931//Insulin resistance;ko04922//Glucagon signaling pathway	-	-	-	gi|817087306|ref|XP_012266420.1|/0/PREDICTED: glycogen phosphorylase [Athalia rosae]
Btabaci_GLEAN_10021281	BTA010267.1,novel_T006448	111.74	86.85	154.12	139.23	84.01	83.47	67.91	90.69	-	-	-	-	-	-	gi|751463613|ref|XP_011186715.1|/0/PREDICTED: cationic amino acid transporter 3 [Bactrocera cucurbitae]
CUFF97.322.1	BTA023627.1,novel_T014234	111.04	146.26	95.89	77.19	144.38	161.12	148.83	163.55	-	-	-	-	-	-	gi|662215747|ref|XP_008481772.1|/3.33709e-20/PREDICTED: homeodomain-only protein-like [Diaphorina citri]
Btabaci_GLEAN_10022062	BTA007379.1	111.01	438.75	16.91	23.04	214.91	256.13	567.35	364.34	-	-	ko04142//Lysosome;ko00052//Galactose metabolism;ko00561//Glycerolipid metabolism;ko00600//Sphingolipid metabolism;ko00603//Glycosphingolipid biosynthesis - globo series	-	GO:0016798//hydrolase activity, acting on glycosyl bonds	GO:0008152//metabolic process	gi|985397466|ref|XP_015366280.1|/1.93168e-110/PREDICTED: alpha-N-acetylgalactosaminidase-like [Diuraphis noxia]
CUFF89.435.3	BTA021412.3,novel_T013136,novel_T013137,novel_T013138,novel_T013139,novel_T013140,novel_T013141	110.89	76.61	123.6	138.4	115.8	278.4	115.29	185.26	-	-	-	-	-	-	-
Btabaci_GLEAN_10001145	BTA020870.1,novel_T012726	110.56	132.77	140.86	110.81	90.65	84.55	111.49	108.25	-	-	ko03410//Base excision repair	-	-	GO:0044699;GO:0050794//regulation of cellular process	gi|985422249|ref|XP_015376552.1|/1.32931e-26/PREDICTED: high mobility group protein DSP1 [Diuraphis noxia]
Btabaci_GLEAN_10005527	BTA010796.1	110.31	166.06	112.16	110.01	117.16	102.91	103.65	128.42	-	-	ko03013//RNA transport;ko03015//mRNA surveillance pathway;ko03018//RNA degradation	-	-	-	gi|646719456|gb|KDR21568.1|/0/Polyadenylate-binding protein 1 [Zootermopsis nevadensis]
Btabaci_GLEAN_10017038	BTA022152.2,novel_T013594	110.24	137.51	91.77	101.57	138.7	210.16	148.29	139.61	-	-	ko05169//Epstein-Barr virus infection;ko03440//Homologous recombination;ko03050//Proteasome	GO:0008541//proteasome regulatory particle, lid subcomplex	-	GO:0006406//mRNA export from nucleus;GO:0043248//proteasome assembly	gi|662209435|ref|XP_008478319.1|/3.40866e-32/PREDICTED: 26S proteasome complex subunit DSS1 [Diaphorina citri]
Btabaci_GLEAN_10024156	BTA028732.1,novel_T017185	109.59	164.63	78.32	86.72	273.47	278.9	307.56	318.3	-	-	ko03010//Ribosome	-	-	-	gi|662196470|ref|XP_008471266.1|/3.06575e-32/PREDICTED: 60S ribosomal protein L14 [Diaphorina citri]
CUFF5.485.1	BTA001593.1,novel_T000963	109.5	91.12	123.05	94.44	116	148.85	110.29	121.04	-	-	-	-	-	-	gi|985412984|ref|XP_015372011.1|/8.42635e-22/PREDICTED: uncharacterized protein LOC107167476 [Diuraphis noxia]
Btabaci_GLEAN_10010669	BTA002033.1,novel_T001338	109.44	110.07	63	62.68	166.66	132.31	147.63	107.05	-	-	-	-	-	-	gi|939627450|ref|XP_014279094.1|/8.77797e-71/PREDICTED: transcription factor BTF3 homolog 4 [Halyomorpha halys]
Btabaci_GLEAN_10023608	BTA001062.1	109	127.2	74.98	77.3	193.35	159.59	164.11	194.12	-	-	-	-	-	-	gi|374093524|gb|AEY84055.1|/3.17437e-47/CSP1 [Bemisia tabaci]
CUFF4.781.2	BTA001279.2,novel_T000749,novel_T000750	108.67	87.8	146.58	145.72	102.59	181.25	99.66	125.07	-	-	ko04514//Cell adhesion molecules (CAMs)	-	-	-	gi|939244915|ref|XP_014241817.1|/6.93372e-127/PREDICTED: neural cell adhesion molecule 1-like isoform X2 [Cimex lectularius]
Btabaci_GLEAN_10011105	BTA001411.1,novel_T000877	108.59	88.05	73.68	100.74	153.45	192.93	176.1	233.95	-	-	-	-	-	-	gi|149689160|gb|ABR27933.1|/4.02739e-35/putative secreted salivary peptide precursor [Triatoma infestans]
Btabaci_GLEAN_10025725	BTA015835.1,novel_T009978	108.35	95.63	101.84	89.73	87.5	78.82	73.96	116.12	-	-	ko05169//Epstein-Barr virus infection;ko04151//PI3K-Akt signaling pathway;ko05203//Viral carcinogenesis;ko04390//Hippo signaling pathway;ko04391//Hippo signaling pathway - fly;ko04110//Cell cycle;ko04114//Oocyte meiosis;ko04722//Neurotrophin signaling pathway	-	-	-	gi|752877354|ref|XP_011256108.1|/3.34609e-165/PREDICTED: 14-3-3 protein epsilon isoform X2 [Camponotus floridanus]
Btabaci_GLEAN_10020817	BTA012003.1,novel_T007533	108.23	147.4	78.56	85.78	127.23	167.49	129.81	144.17	-	-	ko01100//Metabolic pathways;ko05016//Huntington's disease;ko05010//Alzheimer's disease;ko05012//Parkinson's disease;ko00190//Oxidative phosphorylation;ko04932//Non-alcoholic fatty liver disease (NAFLD)	-	-	-	gi|929379841|ref|XP_014100273.1|/1.3699e-38/PREDICTED: NADH dehydrogenase [ubiquinone] 1 beta subcomplex subunit 5, mitochondrial [Bactrocera oleae]
Btabaci_GLEAN_10004510	BTA012686.2,novel_T007902,novel_T007903,novel_T007904,novel_T007905,novel_T007906,novel_T007907	108	79.71	136.24	136.09	72.62	30.87	54.2	73.99	-	-	ko04144//Endocytosis;ko04666//Fc gamma R-mediated phagocytosis;ko05100//Bacterial invasion of epithelial cells;ko04072//Phospholipase D signaling pathway;ko04721//Synaptic vesicle cycle;ko04961//Endocrine and other factor-regulated calcium reabsorption	-	-	-	gi|780681543|ref|XP_011697645.1|/0/PREDICTED: dynamin isoform X9 [Wasmannia auropunctata]
Btabaci_GLEAN_10025243	BTA021042.1	107.96	104.78	118.98	113.1	102.83	85.98	89.51	108.85	-	-	ko04910//Insulin signaling pathway;ko04210//Apoptosis	-	-	-	gi|646697097|gb|KDR08982.1|/0/cAMP-dependent protein kinase type II regulatory subunit [Zootermopsis nevadensis]
Btabaci_GLEAN_10004059	BTA013588.1,novel_T008572	107.76	164.69	103.79	119.71	140	118.64	152.88	131.13	-	-	ko04145//Phagosome;ko04141//Protein processing in endoplasmic reticulum;ko05166//HTLV-I infection;ko04612//Antigen processing and presentation;ko05142//Chagas disease (American trypanosomiasis)	GO:0005783//endoplasmic reticulum	GO:0005509//calcium ion binding;GO:0051082//unfolded protein binding	GO:0006457//protein folding	gi|383851166|ref|XP_003701110.1|/0/PREDICTED: calreticulin [Megachile rotundata]
CUFF80.37.1	BTA019205.1	107.72	86.9	111.3	72.07	76.59	35.36	68.96	63.7	-	-	-	-	-	-	gi|939641746|ref|XP_014271424.1|/4.06975e-30/PREDICTED: failed axon connections [Halyomorpha halys]
CUFF61.300.1	BTA014658.1	107.26	120.16	104.89	81.53	134.74	155.9	117.51	130.44	-	-	ko03010//Ribosome	-	-	-	gi|951536041|ref|XP_014471484.1|/1.2279e-40/PREDICTED: 39S ribosomal protein L35, mitochondrial [Dinoponera quadriceps]
Btabaci_GLEAN_10022154	BTA007065.1,novel_T004510,novel_T004511,novel_T004512	107.02	90.28	90.02	96.17	97.98	187.08	96.03	110.67	-	-	-	-	-	-	-
Btabaci_GLEAN_10019574	BTA016248.1,novel_T010175,novel_T010176,novel_T010177,novel_T010179	107.01	119	104.66	95.02	106.5	139.79	102.05	100.86	-	-	-	-	-	-	gi|646714244|gb|KDR18289.1|/2.19435e-84/Mitochondrial import inner membrane translocase subunit Tim23 [Zootermopsis nevadensis]
Btabaci_GLEAN_10026359	BTA005150.1,novel_T003433	106.91	151.94	103.81	115.16	145.26	133.28	165.11	152.74	-	-	ko05130//Pathogenic Escherichia coli infection	-	-	-	gi|936718433|ref|XP_014237141.1|/1.12655e-15/PREDICTED: flocculation protein FLO11-like [Trichogramma pretiosum]
CUFF107.269.1	BTA025985.1	106.61	104.89	82.93	73.74	104.87	86.24	85.74	82.24	-	-	ko05146//Amoebiasis;ko05110//Vibrio cholerae infection	-	-	-	gi|56283929|ref|NP_523475.3|/4.13043e-15/salivary gland secretion 1 [Drosophila melanogaster]
Btabaci_GLEAN_10025591	BTA017175.1,novel_T010703	106.61	78.61	137.19	133.79	99.49	183.93	96.48	147.6	-	-	-	-	-	-	gi|646691513|gb|KDR07140.1|/1.56316e-22/PBAN-type neuropeptide [Zootermopsis nevadensis]
Btabaci_GLEAN_10002392	BTA017150.1,novel_T010683	106.59	79.01	126.5	100.68	109.4	218.28	97.92	141.14	-	-	ko01100//Metabolic pathways;ko00790//Folate biosynthesis	-	-	-	gi|662207599|ref|XP_008477310.1|/3.74711e-20/PREDICTED: membrane-bound alkaline phosphatase-like [Diaphorina citri]
Btabaci_GLEAN_10008293	BTA005970.1,novel_T003867,novel_T003868,novel_T003869,novel_T003870	106.55	42.65	73.26	143.64	141.79	303.73	153.08	246.63	-	-	ko04141//Protein processing in endoplasmic reticulum	-	-	-	gi|198250388|gb|ACH85196.1|/2.07086e-135/heat shock protein 20 [Bemisia tabaci]
Btabaci_GLEAN_10019433	BTA016641.1,novel_T010396,novel_T010397	105.83	70.79	134.1	128.72	74.94	61.85	77.69	83.5	-	-	ko04976//Bile secretion;ko04970//Salivary secretion;ko04972//Pancreatic secretion;ko04971//Gastric acid secretion	GO:0016020//membrane	GO:0008509//anion transmembrane transporter activity	GO:0006820//anion transport	gi|939232826|ref|XP_014256691.1|/0/PREDICTED: band 3 anion transport protein isoform X5 [Cimex lectularius]
Btabaci_GLEAN_10020363	BTA013522.1,novel_T008544,novel_T008545	105.49	111.72	119.53	131.44	115.52	138.11	135.77	144.89	-	-	-	-	-	-	gi|501291402|dbj|BAN20358.1|/9.87692e-142/conserved hypothetical protein [Riptortus pedestris]
Btabaci_GLEAN_10026559	BTA001295.1	105.45	119.09	106.32	103.22	110.29	91.85	109.36	119.53	-	-	ko05134//Legionellosis	GO:0005622//intracellular;GO:0016021//integral component of membrane	GO:0004930//G-protein coupled receptor activity;GO:0005525//GTP binding	GO:0007186//G-protein coupled receptor signaling pathway;GO:0007264//small GTPase mediated signal transduction	gi|646718134|gb|KDR20725.1|/5.44161e-133/Ras-related protein Rab-1A [Zootermopsis nevadensis]
Btabaci_GLEAN_10016821	BTA022405.1,novel_T013654	105.39	83.07	133.41	130.01	102.44	75.67	98.86	109.75	-	-	ko00910//Nitrogen metabolism	-	GO:0004721//phosphoprotein phosphatase activity;GO:0046872//metal ion binding	GO:0044237//cellular metabolic process	gi|985411580|ref|XP_015371257.1|/9.2853e-91/PREDICTED: carbonic anhydrase 2 [Diuraphis noxia]
CUFF107.558.1	BTA026114.1,novel_T015591	105.1	100	100.51	103.58	102.6	172.62	77.33	137.01	-	-	-	-	-	-	-
Btabaci_GLEAN_10025300	BTA020475.1	105.07	155.25	89.32	82.01	193.08	137.98	187.38	176.29	-	-	-	-	GO:0008233//peptidase activity	-	gi|646698118|gb|KDR09452.1|/0/putative serine carboxypeptidase CPVL [Zootermopsis nevadensis]
Btabaci_GLEAN_10016218	BTA023526.1	104.74	169.62	88.99	83.9	146.49	157.57	176.54	172.09	-	-	-	GO:0005853//eukaryotic translation elongation factor 1 complex	GO:0003746//translation elongation factor activity	GO:0006414//translational elongation	gi|914614491|ref|NP_001299561.1|/6.22728e-95/elongation factor 1-beta' [Papilio xuthus]
Btabaci_GLEAN_10027144	BTA009025.1	104.66	112.31	99.66	94.26	112.56	68.19	107.13	105.66	-	-	-	GO:0005739//mitochondrion	GO:0000062//fatty-acyl-CoA binding;GO:0003995//acyl-CoA dehydrogenase activity;GO:0009055//electron carrier activity;GO:0050660//flavin adenine dinucleotide binding;GO:0052890//oxidoreductase activity, acting on the CH-CH group of donors, with a flavin as acceptor	GO:0033539//fatty acid beta-oxidation using acyl-CoA dehydrogenase;GO:0055088//lipid homeostasis	gi|1000207757|gb|KXJ78340.1|/4.19853e-140/hypothetical protein RP20_CCG004929 [Aedes albopictus]
Btabaci_GLEAN_10004420	BTA012912.1,novel_T008115	104.38	88.89	94.19	94.44	107.58	88.38	92.47	100.86	-	-	ko05146//Amoebiasis;ko05110//Vibrio cholerae infection	-	-	-	gi|193702253|ref|XP_001945904.1|/6.17239e-172/PREDICTED: uncharacterized protein LOC100166777 [Acyrthosiphon pisum]
CUFF113.110.2	BTA027496.1,novel_T016506,novel_T016507,novel_T016508	104.34	98.88	110.67	83.77	75.84	133.35	105.06	114.01	-	-	-	-	-	-	gi|939639011|ref|XP_008547946.2|/2.107e-07/PREDICTED: uncharacterized protein 35a-6 [Microplitis demolitor]
Btabaci_GLEAN_10024672	BTA025383.1,novel_T015196	104.31	92.32	113.13	113.45	100.07	126.88	89.57	107.81	-	-	-	-	-	-	gi|826490161|ref|XP_012539927.1|/2.13171e-64/PREDICTED: 26S proteasome non-ATPase regulatory subunit 9 [Monomorium pharaonis]
Btabaci_GLEAN_10020584	BTA012861.1,novel_T008034	103.96	118.32	92.68	81.43	106.29	114.17	100.38	89.29	-	-	-	-	-	-	gi|914556527|gb|KOB65743.1|/7.4571e-06/Uncharacterized protein OBRU01_22626 [Operophtera brumata]
Btabaci_GLEAN_10014149	BTA026992.1,novel_T016200,novel_T016201	103.4	127.95	81.46	83.73	125.49	122.21	113.03	107.04	-	-	ko00970//Aminoacyl-tRNA biosynthesis	-	-	-	gi|156550087|ref|XP_001605577.1|/0/PREDICTED: probable phenylalanine--tRNA ligase, mitochondrial [Nasonia vitripennis]
Btabaci_GLEAN_10026685	BTA029138.1,novel_T017487,novel_T017488,novel_T017490,novel_T017491,novel_T017492,novel_T017493,novel_T017494,novel_T017495,novel_T017496	103.36	137	73.47	82.32	130.33	161.36	129.61	125.68	-	-	ko04810//Regulation of actin cytoskeleton;ko03013//RNA transport	-	-	-	gi|861618468|gb|KMQ86816.1|/3.20156e-81/cytoplasmic fmr1-interacting protein [Lasius niger]
Btabaci_GLEAN_10013757	BTA027667.1,novel_T016679,novel_T016680	103.34	106.21	119.1	111.7	96.91	78.7	126.08	117.02	-	-	ko01100//Metabolic pathways;ko00230//Purine metabolism;ko00450//Selenocompound metabolism;ko00920//Sulfur metabolism;ko00261//Monobactam biosynthesis	-	-	-	gi|985395636|ref|XP_015365279.1|/0/PREDICTED: bifunctional 3'-phosphoadenosine 5'-phosphosulfate synthase isoform X1 [Diuraphis noxia]
Btabaci_GLEAN_10007788	BTA006755.1	103.18	117.51	80.49	81.86	145.15	41.72	197.57	114.3	-	-	ko01100//Metabolic pathways;ko04910//Insulin signaling pathway;ko04152//AMPK signaling pathway;ko01212//Fatty acid metabolism;ko00061//Fatty acid biosynthesis	-	GO:0004313//[acyl-carrier-protein] S-acetyltransferase activity;GO:0004314//[acyl-carrier-protein] S-malonyltransferase activity;GO:0004315//3-oxoacyl-[acyl-carrier-protein] synthase activity;GO:0004316//3-oxoacyl-[acyl-carrier-protein] reductase (NADPH) activity;GO:0004317//3-hydroxypalmitoyl-[acyl-carrier-protein] dehydratase activity;GO:0004319//enoyl-[acyl-carrier-protein] reductase (NADPH, B…	GO:0009058//biosynthetic process;GO:0055114//oxidation-reduction process	gi|641657581|ref|XP_008180399.1|/0/PREDICTED: fatty acid synthase-like isoform X2 [Acyrthosiphon pisum]
Btabaci_GLEAN_10004714	BTA012328.1,novel_T007737,novel_T007738,novel_T007739,novel_T007740,novel_T007741,novel_T007742,novel_T007743,novel_T007744,novel_T007745,novel_T007746	102.81	91.93	96.59	79.79	121.25	103.27	113.56	125.64	-	-	-	-	-	-	gi|339896275|gb|AEK21823.1|/1.11362e-143/cytochrome P450 [Bemisia tabaci]
Btabaci_GLEAN_10014447	BTA026613.1,novel_T015927	102.77	80.27	113.25	96.85	72.92	60.75	57.98	73.1	-	-	ko04727//GABAergic synapse	GO:0016020//membrane	GO:0015293//symporter activity	GO:0006810//transport	gi|242022627|ref|XP_002431741.1|/0/sodium-dependent nutrient amino acid transporter, putative [Pediculus humanus corporis]
Btabaci_GLEAN_10026245	BTA007676.1,novel_T004928,novel_T004929,novel_T004930,novel_T004931	102.74	105.96	109.28	103.39	67.61	25.94	44.18	25.28	-	-	ko04919//Thyroid hormone signaling pathway;ko05414//Dilated cardiomyopathy;ko04022//cGMP-PKG signaling pathway;ko05410//Hypertrophic cardiomyopathy (HCM);ko04530//Tight junction;ko04261//Adrenergic signaling in cardiomyocytes;ko05416//Viral myocarditis;ko04260//Cardiac muscle contraction	-	-	-	gi|914575244|gb|KOB77375.1|/0/Myosin heavy chain, muscle [Operophtera brumata]
Btabaci_GLEAN_10006981	BTA008176.1,novel_T005305	102.61	96.21	109.71	103.56	74.03	34.37	64.09	55.69	-	-	ko04024//cAMP signaling pathway;ko04022//cGMP-PKG signaling pathway;ko04020//Calcium signaling pathway;ko04970//Salivary secretion;ko04261//Adrenergic signaling in cardiomyocytes;ko04972//Pancreatic secretion;ko04978//Mineral absorption;ko04961//Endocrine and other factor-regulated calcium reabsorption	-	-	-	gi|939236756|ref|XP_014257900.1|/0/PREDICTED: plasma membrane calcium-transporting ATPase 2 isoform X7 [Cimex lectularius]
Btabaci_GLEAN_10006946	BTA008245.1,novel_T005341,novel_T005342,novel_T005343,novel_T005344,novel_T005345,novel_T005346,novel_T005347,novel_T005348	102.6	98.77	106.25	106.25	99.03	120.88	109.91	110.09	-	-	-	-	-	-	gi|936690986|ref|XP_014223479.1|/2.79426e-110/PREDICTED: RNA-binding protein lark isoform X7 [Trichogramma pretiosum]
Btabaci_GLEAN_10025106	BTA022079.1,novel_T013529,novel_T013530,novel_T013531,novel_T013532,novel_T013533,novel_T013534,novel_T013535,novel_T013536,novel_T013537	102.5	133.6	84.52	77.26	166.44	162.58	195.66	179.11	-	-	ko04144//Endocytosis;ko04015//Rap1 signaling pathway;ko04151//PI3K-Akt signaling pathway;ko04510//Focal adhesion;ko05202//Transcriptional misregulation in cancer;ko04014//Ras signaling pathway;ko04066//HIF-1 signaling pathway;ko05323//Rheumatoid arthritis;ko04060//Cytokine-cytokine receptor interaction	-	-	-	gi|571531291|ref|XP_006569987.1|/0/PREDICTED: LOW QUALITY PROTEIN: protein ECT2 [Apis mellifera]
Btabaci_GLEAN_10000880	BTA021852.1,novel_T013404,novel_T013405,novel_T013406	102.25	73.39	132.42	125.66	81.23	103.51	76.4	94.98	-	-	-	-	-	-	gi|642930266|ref|XP_008196322.1|/1.44267e-21/PREDICTED: uncharacterized protein LOC103313833 isoform X1 [Tribolium castaneum]
Btabaci_GLEAN_10010945	BTA001584.1,novel_T000957	102.09	64.1	153.14	128.05	70.98	103.31	71.2	98.86	-	-	ko04810//Regulation of actin cytoskeleton;ko05205//Proteoglycans in cancer;ko05100//Bacterial invasion of epithelial cells;ko04062//Chemokine signaling pathway;ko04510//Focal adhesion;ko05203//Viral carcinogenesis;ko04670//Leukocyte transendothelial migration;ko04370//VEGF signaling pathway	-	-	-	gi|307213606|gb|EFN88992.1|/4.52581e-14/hypothetical protein EAI_11785 [Harpegnathos saltator]
Btabaci_GLEAN_10021242	BTA010439.1,novel_T006586	101.88	102.43	98.58	106.39	90.19	65.47	73.04	73.47	-	-	-	-	-	-	gi|939256146|ref|XP_014247850.1|/5.16768e-92/PREDICTED: failed axon connections [Cimex lectularius]
Btabaci_GLEAN_10006051	BTA009876.2,novel_T006260	101.85	100.75	95.05	93.69	91.57	88.69	93	88.43	-	-	ko05134//Legionellosis	-	-	-	gi|501297524|dbj|BAN21176.1|/3.492e-84/serine/threonine-protein kinase [Riptortus pedestris]
Btabaci_GLEAN_10024943	BTA023118.1,novel_T014049	101.84	72.46	162.25	139.98	70.53	45.86	56.98	81.12	-	-	ko05016//Huntington's disease;ko04080//Neuroactive ligand-receptor interaction;ko04072//Phospholipase D signaling pathway;ko04020//Calcium signaling pathway;ko04724//Glutamatergic synapse;ko04540//Gap junction;ko04723//Retrograde endocannabinoid signaling;ko04720//Long-term potentiation	-	-	-	gi|662207232|ref|XP_008477111.1|/2.01043e-25/PREDICTED: uncharacterized protein LOC103514023, partial [Diaphorina citri]
Btabaci_GLEAN_10004282	BTA013126.1,novel_T008255,novel_T008256,novel_T008257	101.81	113.59	105.75	107.83	120.03	80.05	120.74	112.16	-	-	ko04115//p53 signaling pathway	-	GO:0008270//zinc ion binding;GO:0016491//oxidoreductase activity	GO:0055114//oxidation-reduction process	gi|646711201|gb|KDR16462.1|/9.74979e-174/Synaptic vesicle membrane protein VAT-1-like protein-like, partial [Zootermopsis nevadensis]
Btabaci_GLEAN_10005077	BTA011555.1	101.59	125.08	148.37	103.37	181.74	147.27	162.12	184.77	-	-	-	-	-	-	gi|345485386|ref|XP_001604043.2|/1.81731e-44/PREDICTED: uncharacterized protein LOC100119572 [Nasonia vitripennis]
Btabaci_GLEAN_10022511	BTA005584.1,novel_T003638,novel_T003639,novel_T003640	101.52	109.78	80.33	85.42	108.11	123.35	104.59	122.78	-	-	ko03013//RNA transport	-	-	-	gi|795034936|ref|XP_011864779.1|/5.74717e-66/PREDICTED: myosin-4 isoform X3 [Vollenhovia emeryi]
Btabaci_GLEAN_10021176	BTA010709.1,novel_T006777,novel_T006778,novel_T006779,novel_T006783	100.76	83.79	117.92	111.74	73.04	23.56	69.54	61.79	-	-	ko04514//Cell adhesion molecules (CAMs)	-	-	-	gi|1004397473|gb|EFA08351.2|/0/hypothetical protein TcasGA2_TC005994 [Tribolium castaneum]
Btabaci_GLEAN_10013843	BTA027422.1,novel_T016480	100.05	104.73	98.83	93.41	78.04	67.1	82.03	91.84	-	-	ko01100//Metabolic pathways;ko05110//Vibrio cholerae infection;ko04145//Phagosome;ko00190//Oxidative phosphorylation;ko04721//Synaptic vesicle cycle;ko05323//Rheumatoid arthritis;ko05120//Epithelial cell signaling in Helicobacter pylori infection;ko04966//Collecting duct acid secretion	-	GO:0042626//ATPase activity, coupled to transmembrane movement of substances	GO:0055085//transmembrane transport	gi|46561758|gb|AAT01084.1|/6.74935e-137/putative vacuolar ATP synthase subunit D [Homalodisca vitripennis]
Btabaci_GLEAN_10022619	BTA005198.1,novel_T003475	100.03	119.43	95.19	120.79	132.35	238.95	128.58	193.99	-	-	-	-	-	-	-
Btabaci_GLEAN_10024174	BTA028749.1	99.92	60.45	102.82	81.25	76.19	72.42	50.77	73.01	-	-	-	-	-	-	gi|239790055|dbj|BAH71613.1|/8.79772e-51/ACYPI006634 [Acyrthosiphon pisum]
CUFF75.77.1	BTA017612.1	99.75	120.46	112.79	98.36	134.72	143.75	144.56	135.02	-	-	-	-	-	-	gi|817192437|ref|XP_012271655.1|/4.51355e-55/PREDICTED: thioredoxin, mitochondrial [Orussus abietinus]
CUFF100.512.1	BTA024472.1	99.61	127.2	87.23	83.75	97.69	114.68	105.29	83.59	-	-	ko01100//Metabolic pathways;ko05016//Huntington's disease;ko05010//Alzheimer's disease;ko05012//Parkinson's disease;ko00190//Oxidative phosphorylation;ko04932//Non-alcoholic fatty liver disease (NAFLD)	-	-	-	gi|998495935|ref|XP_015523659.1|/2.73587e-22/PREDICTED: NADH dehydrogenase [ubiquinone] 1 subunit C2 [Neodiprion lecontei]
CUFF76.112.1	BTA018068.2,novel_T011142	99.22	135.17	123.31	113.94	122.82	101.65	133.83	140.85	-	-	ko04612//Antigen processing and presentation	-	-	-	gi|242025500|ref|XP_002433162.1|/4.19186e-27/gamma-interferon-inducible lysosomal thiol reductase precursor, putative [Pediculus humanus corporis]
CUFF52.139.1	BTA012394.1	99.1	58.76	83.4	90.52	61.76	133.89	64.66	65.13	-	-	-	-	-	-	-
Btabaci_GLEAN_10000990	BTA021471.1,novel_T013152	99.09	69.13	129.62	108.23	72.16	66.83	61.09	75.73	-	-	-	-	-	-	gi|939696750|ref|XP_014292517.1|/0/PREDICTED: uncharacterized protein LOC106691301 [Halyomorpha halys]
Btabaci_GLEAN_10018620	BTA018600.1,novel_T011305,novel_T011306,novel_T011307,novel_T011308,novel_T011309	99.06	147.3	80.77	70.73	142.38	153.88	184.2	124.56	-	-	-	-	-	-	gi|339896279|gb|AEK21825.1|/0/cytochrome P450 [Bemisia tabaci]
Btabaci_GLEAN_10010391	BTA002515.1,novel_T001689,novel_T001690,novel_T001691,novel_T001692	98.88	108.18	91.76	72.6	72.9	55.53	71.25	75.35	-	-	-	-	-	-	gi|1000745632|ref|XP_015595559.1|/0/PREDICTED: ATP-dependent RNA helicase dbp2-like isoform X1 [Cephus cinctus]
Btabaci_GLEAN_10020953	BTA011515.1	98.55	113.97	76.11	77.45	157.2	194.95	174.62	149.1	-	-	ko03010//Ribosome	GO:0022627//cytosolic small ribosomal subunit	GO:0003735//structural constituent of ribosome	GO:0006412//translation	gi|646710612|gb|KDR16079.1|/1.36531e-156/40S ribosomal protein S3a [Zootermopsis nevadensis]
Btabaci_GLEAN_10018111	BTA019795.1,novel_T011923	98.25	100.28	99	108.33	100	101.48	90.04	93.83	-	-	-	-	-	-	gi|914544431|gb|KOB58137.1|/1.12116e-49/putative cuticle protein [Operophtera brumata]
Btabaci_GLEAN_10023075	BTA003300.1,novel_T002308	98.25	95.29	78.67	97.16	73.99	60.65	87.29	77.69	-	-	ko00240//Pyrimidine metabolism;ko00450//Selenocompound metabolism	-	-	-	gi|939690840|ref|XP_014289417.1|/0/PREDICTED: thioredoxin reductase 1, mitochondrial isoform X5 [Halyomorpha halys]
Btabaci_GLEAN_10007170	BTA007864.1,novel_T005046	98.03	97.06	105.43	112.09	92.59	82.94	84.38	83.19	-	-	ko04151//PI3K-Akt signaling pathway;ko04141//Protein processing in endoplasmic reticulum;ko05166//HTLV-I infection;ko04022//cGMP-PKG signaling pathway;ko05203//Viral carcinogenesis;ko04010//MAPK signaling pathway;ko05034//Alcoholism;ko04932//Non-alcoholic fatty liver disease (NAFLD);ko04261//Adrenergic signaling in cardiomyocytes;ko04728//Dopaminergic synapse;ko04722//Neurotrophin signaling pathw…	-	-	-	gi|817079627|ref|XP_012262242.1|/2.61386e-07/PREDICTED: activating transcription factor of chaperone isoform X2 [Athalia rosae]
Btabaci_GLEAN_10009645	BTA003800.1,novel_T002636	97.97	116.59	97.57	86.37	108.95	72.84	84.58	96.05	-	-	ko01100//Metabolic pathways;ko05016//Huntington's disease;ko05010//Alzheimer's disease;ko05012//Parkinson's disease;ko00190//Oxidative phosphorylation;ko04932//Non-alcoholic fatty liver disease (NAFLD)	-	-	-	gi|357606579|gb|EHJ65122.1|/0/NADH-ubiquinone oxidoreductase 75 kDa subunit [Danaus plexippus]
Btabaci_GLEAN_10026109	BTA009072.1,novel_T005739	97.87	161.19	8.67	1.44	335.3	179.18	321.94	63.45	-	-	ko05146//Amoebiasis;ko05110//Vibrio cholerae infection	-	-	-	gi|572268951|ref|XP_006612507.1|/9.90346e-12/PREDICTED: vegetative cell wall protein gp1-like [Apis dorsata]
Btabaci_GLEAN_10012536	BTA029412.1	97.7	59.5	79.51	80.29	61.82	27.5	65.89	77.57	-	-	-	-	-	-	gi|646720528|gb|KDR22208.1|/7.03502e-94/Immediate early response gene 5-like protein [Zootermopsis nevadensis]
Btabaci_GLEAN_10017224	BTA021764.4,novel_T013351,novel_T013352,novel_T013353,novel_T013354,novel_T013355,novel_T013356,novel_T013357,novel_T013358,novel_T013359,novel_T013360,novel_T013361,novel_T013362,novel_T013363,novel_T013364,novel_T013365,novel_T013366,novel_T013367,novel_T013368	97.64	81.09	114.57	109.08	92.31	94.04	79.84	85.97	-	-	-	-	-	-	gi|766918827|ref|XP_011500555.1|/0/PREDICTED: electroneutral sodium bicarbonate exchanger 1 [Ceratosolen solmsi marchali]
CUFF75.71.1	BTA017609.1,novel_T010893,novel_T010894	97.29	88.52	92.72	109.8	95.77	146.46	97.03	109.07	-	-	-	-	-	-	-
Btabaci_GLEAN_10020983	BTA011369.1,novel_T007161	97.2	70.79	64.68	87.48	82.43	136.13	81.92	122.02	-	-	ko01100//Metabolic pathways;ko00500//Starch and sucrose metabolism;ko00052//Galactose metabolism	-	-	-	gi|646685191|gb|KDR03832.1|/5.11099e-125/Maltase 1, partial [Zootermopsis nevadensis]
Btabaci_GLEAN_10022481	BTA005642.2,novel_T003682	97.04	100.53	116.36	114.84	87.85	69.37	75.11	104.91	-	-	ko04152//AMPK signaling pathway	GO:0005622//intracellular	GO:0004767//sphingomyelin phosphodiesterase activity;GO:0005525//GTP binding	GO:0007264//small GTPase mediated signal transduction	gi|1009554069|ref|XP_015912455.1|/9.12044e-135/PREDICTED: ras-related protein Rab-2 [Parasteatoda tepidariorum]
Btabaci_GLEAN_10011768	BTA000392.1,novel_T000335,novel_T000336,novel_T000337	96.88	98.06	91.14	89.07	89.95	82.88	81.86	77.98	-	-	-	-	-	-	gi|939687591|ref|XP_014287762.1|/0/PREDICTED: transmembrane GTPase Marf isoform X3 [Halyomorpha halys]
Btabaci_GLEAN_10023827	BTA000129.1,novel_T000167,novel_T000168	96.54	78.21	114.71	106.24	80.75	53.42	79.67	69.89	-	-	-	-	-	-	gi|646697946|gb|KDR09361.1|/0/Ecdysone-induced protein 75B, isoform A [Zootermopsis nevadensis]
Btabaci_GLEAN_10022441	BTA005889.1,novel_T003809,novel_T003810,novel_T003811,novel_T003812,novel_T003813,novel_T003814,novel_T003815,novel_T003816	95.96	76.79	97.03	96.71	75.43	45.57	61.92	57.52	-	-	ko04530//Tight junction	-	-	-	gi|646710809|gb|KDR16227.1|/0/Spectrin beta chain [Zootermopsis nevadensis]
Btabaci_GLEAN_10022149	BTA007149.1,novel_T004579	95.86	74.89	131.14	109.5	81.95	79.26	86.61	89.34	-	-	ko04391//Hippo signaling pathway - fly	-	-	-	gi|193631821|ref|XP_001950452.1|/1.27761e-45/PREDICTED: uncharacterized protein LOC100158766 [Acyrthosiphon pisum]
Btabaci_GLEAN_10020770	BTA012257.4,novel_T007693	95.74	122.04	49.52	73.59	116.99	105.29	124.49	126.06	-	-	ko01100//Metabolic pathways;ko01212//Fatty acid metabolism;ko00310//Lysine degradation;ko00280//Valine, leucine and isoleucine degradation;ko00380//Tryptophan metabolism;ko00071//Fatty acid degradation;ko00062//Fatty acid elongation;ko00650//Butanoate metabolism	-	-	-	gi|659495166|gb|AID66694.1|/1.21856e-148/hydroxyacyl-CoA dehydrogenase [Agrotis segetum]
Btabaci_GLEAN_10016803	BTA022539.1,novel_T013780	95.35	103.09	87.33	82.98	90.89	62.9	76.01	75.92	-	-	ko01100//Metabolic pathways;ko01212//Fatty acid metabolism;ko00280//Valine, leucine and isoleucine degradation;ko00071//Fatty acid degradation;ko00062//Fatty acid elongation	-	-	-	gi|985392768|ref|XP_015363698.1|/0/PREDICTED: trifunctional enzyme subunit beta, mitochondrial [Diuraphis noxia]
Btabaci_GLEAN_10020307	BTA013699.1,novel_T008629	95.17	45.27	142.52	112.98	27.16	12.47	6.66	5.98	-	-	ko05146//Amoebiasis;ko05110//Vibrio cholerae infection	-	-	-	gi|662207391|ref|XP_008477195.1|/4.59283e-73/PREDICTED: uncharacterized protein LOC103514108 [Diaphorina citri]
Btabaci_GLEAN_10015115	BTA025563.1,novel_T015276	94.95	101.1	98.78	91.54	109.68	128.82	112.65	117.64	-	-	ko04666//Fc gamma R-mediated phagocytosis;ko04062//Chemokine signaling pathway	-	-	-	gi|642939160|ref|XP_969591.2|/3.85092e-102/PREDICTED: protein D3 isoform X1 [Tribolium castaneum]
Btabaci_GLEAN_10027218	BTA000032.1,novel_T000059,novel_T000060	94.79	93.54	84.51	90.04	99.17	102.76	99.46	97.58	-	-	-	-	-	-	gi|939687447|ref|XP_014287718.1|/3.56854e-110/PREDICTED: tumor protein D54 isoform X1 [Halyomorpha halys]
Btabaci_GLEAN_10009753	BTA003599.3,novel_T002508,novel_T002509,novel_T002510,novel_T002511,novel_T002512,novel_T002513,novel_T002514,novel_T002515	94.71	75.75	110.59	119.73	66.11	47.08	33.38	35.62	-	-	ko04142//Lysosome	-	-	-	gi|939262434|ref|XP_014251146.1|/1.06604e-72/PREDICTED: sensory neuron membrane protein 1-like [Cimex lectularius]
Btabaci_GLEAN_10008816	BTA005102.1,novel_T003392	93.73	92.6	92.13	77	69.29	56.67	70.01	70.63	-	-	-	-	-	-	gi|939236516|ref|XP_014256289.1|/1.9966e-80/PREDICTED: lipid storage droplets surface-binding protein 1-like isoform X3 [Cimex lectularius]
Btabaci_GLEAN_10022884	BTA003997.1	93.67	45.16	119.96	47.52	66.84	0	26.69	109.09	-	-	ko01100//Metabolic pathways;ko00230//Purine metabolism;ko05169//Epstein-Barr virus infection;ko05016//Huntington's disease;ko00240//Pyrimidine metabolism;ko05168//Herpes simplex infection;ko03020//RNA polymerase	-	-	-	gi|641656188|ref|XP_008179876.1|/2.54069e-08/PREDICTED: endoplasmic reticulum aminopeptidase 2-like [Acyrthosiphon pisum]
Btabaci_GLEAN_10025662	BTA016328.1,novel_T010237,novel_T010238,novel_T010239,novel_T010240	93.39	91.71	96.55	75.74	90.2	92.18	99.72	101.42	-	-	ko05168//Herpes simplex infection;ko03040//Spliceosome	-	-	-	gi|646716250|gb|KDR19579.1|/1.79304e-162/Rho GTPase-activating protein 19 [Zootermopsis nevadensis]
Btabaci_GLEAN_10009100	BTA004709.1,novel_T003217,novel_T003218,novel_T003219	93.01	154.05	73.87	65.1	107.92	60.82	119.71	99.28	-	-	ko01100//Metabolic pathways;ko00500//Starch and sucrose metabolism;ko00040//Pentose and glucuronate interconversions;ko00052//Galactose metabolism;ko00520//Amino sugar and nucleotide sugar metabolism	-	-	-	gi|646710077|gb|KDR15697.1|/0/UTP--glucose-1-phosphate uridylyltransferase [Zootermopsis nevadensis]
Btabaci_GLEAN_10006870	BTA008433.3,novel_T005421,novel_T005422	92.89	78.1	82.48	99.14	84.79	141.54	81.03	109.16	-	-	-	-	-	-	gi|755989854|ref|XP_011312319.1|/1.29523e-92/PREDICTED: uncharacterized protein LOC105272109 isoform X4 [Fopius arisanus]
Btabaci_GLEAN_10022501	BTA005662.2	92.73	97.67	94.96	80.01	149.43	213.82	165.78	178.24	-	-	ko05146//Amoebiasis;ko05110//Vibrio cholerae infection	-	-	-	gi|33772602|gb|AAQ54610.1|/9.03939e-55/Gly d Jun a 3-like protein [Glycyphagus domesticus]
Btabaci_GLEAN_10023100	BTA003165.3,novel_T002167,novel_T002168,novel_T002169,novel_T002170	92.64	73.08	79.54	91.69	77.61	135.11	70.95	106.02	-	-	ko01100//Metabolic pathways;ko00230//Purine metabolism;ko05169//Epstein-Barr virus infection;ko05016//Huntington's disease;ko00240//Pyrimidine metabolism;ko05168//Herpes simplex infection;ko03020//RNA polymerase	-	-	-	gi|907675318|ref|XP_013105230.1|/1.23142e-08/PREDICTED: mucin-2-like, partial [Stomoxys calcitrans]
Btabaci_GLEAN_10020771	BTA012259.1,novel_T007695	92.58	97.95	122.03	112.93	74.19	65.32	59.13	74.18	-	-	ko01100//Metabolic pathways;ko05110//Vibrio cholerae infection;ko04145//Phagosome;ko00190//Oxidative phosphorylation;ko04721//Synaptic vesicle cycle;ko05323//Rheumatoid arthritis;ko05120//Epithelial cell signaling in Helicobacter pylori infection;ko04966//Collecting duct acid secretion	-	-	-	gi|121543569|gb|ABM55510.1|/1.4458e-107/putative vacuolar ATP synthase subunit E [Maconellicoccus hirsutus]
Btabaci_GLEAN_10016448	BTA023209.1,novel_T014108,novel_T014109,novel_T014110,novel_T014111,novel_T014112	92.37	77.61	104.55	107.59	77.58	60.96	69.35	70.12	-	-	ko04530//Tight junction	-	-	-	gi|646722546|gb|KDR23504.1|/0/Spectrin alpha chain [Zootermopsis nevadensis]
Btabaci_GLEAN_10008531	BTA005595.1,novel_T003648	92.05	130.29	69.39	72.23	152.89	87.98	191.06	150.64	-	-	ko01100//Metabolic pathways;ko04146//Peroxisome;ko01212//Fatty acid metabolism;ko00071//Fatty acid degradation;ko00061//Fatty acid biosynthesis;ko03320//PPAR signaling pathway;ko04920//Adipocytokine signaling pathway	-	-	-	gi|998516775|ref|XP_015519188.1|/0/PREDICTED: long-chain-fatty-acid--CoA ligase 4 isoform X2 [Neodiprion lecontei]
Btabaci_GLEAN_10027110	BTA014818.2,novel_T009340,novel_T009341	91.92	144.81	67.94	63.17	159.32	89.2	185.2	158.03	-	-	-	-	GO:0016757//transferase activity, transferring glycosyl groups	-	gi|1004403975|gb|KYB29900.1|/4.27787e-158/Glycogenin-1-like Protein [Tribolium castaneum]
Btabaci_GLEAN_10004360	BTA012999.2,novel_T008163,novel_T008164	91.91	84.64	92.37	81.89	82.76	52.84	79.98	83.71	-	-	ko05200//Pathways in cancer;ko05205//Proteoglycans in cancer;ko04919//Thyroid hormone signaling pathway;ko05231//Choline metabolism in cancer;ko04066//HIF-1 signaling pathway;ko05230//Central carbon metabolism in cancer;ko05211//Renal cell carcinoma;ko04150//mTOR signaling pathway	-	-	-	gi|397133607|gb|AFO10122.1|/5.92944e-62/hypoxia-inducible factor 1 alpha, partial [Locusta migratoria]
Btabaci_GLEAN_10010281	BTA002712.1,novel_T001792,novel_T001793	91.8	127.99	57.64	58.64	79.7	49.55	65.17	64.74	-	-	ko01100//Metabolic pathways;ko01200//Carbon metabolism;ko01230//Biosynthesis of amino acids;ko00020//Citrate cycle (TCA cycle);ko01210//2-Oxocarboxylic acid metabolism	-	-	-	gi|939660202|ref|XP_014278045.1|/0/PREDICTED: isocitrate dehydrogenase [NAD] subunit gamma, mitochondrial isoform X2 [Halyomorpha halys]
Btabaci_GLEAN_10023740	BTA000407.1,novel_T000347,novel_T000348,novel_T000349	91.77	94.71	103.03	91.69	82.67	88.12	71.74	88.87	-	-	ko04152//AMPK signaling pathway	GO:0005802//trans-Golgi network;GO:0005829//cytosol;GO:0045335//phagocytic vesicle;GO:0055037//recycling endosome	GO:0003924//GTPase activity;GO:0005525//GTP binding	GO:0006895//Golgi to endosome transport;GO:0007264//small GTPase mediated signal transduction;GO:0032456//endocytic recycling;GO:0042742//defense response to bacterium;GO:0090382//phagosome maturation	gi|646709057|gb|KDR15105.1|/2.41121e-125/Ras-related protein Rab-14 [Zootermopsis nevadensis]
Btabaci_GLEAN_10017984	BTA020157.1,novel_T012241,novel_T012242,novel_T012243	91.74	100.55	92.24	79.88	86.99	50.94	79.36	69.12	-	-	-	-	-	-	gi|939263311|ref|XP_014251616.1|/0/PREDICTED: tensin [Cimex lectularius]
Btabaci_GLEAN_10016587	BTA022944.1,novel_T013976	91.7	89.57	102.97	98.09	83.67	73.43	62.71	71.91	-	-	ko04141//Protein processing in endoplasmic reticulum;ko04010//MAPK signaling pathway;ko04932//Non-alcoholic fatty liver disease (NAFLD);ko04722//Neurotrophin signaling pathway;ko04071//Sphingolipid signaling pathway;ko05014//Amyotrophic lateral sclerosis (ALS);ko04668//TNF signaling pathway	-	-	-	gi|939239002|ref|XP_014262206.1|/3.81563e-106/PREDICTED: muscle-specific protein 20-like [Cimex lectularius]
Btabaci_GLEAN_10024073	BTA029172.1,novel_T017524,novel_T017525	91.68	67.21	79.39	94.88	92.24	106.97	95.84	120.46	-	-	-	-	-	-	gi|642923708|ref|XP_008193851.1|/2.98006e-36/PREDICTED: HCLS1-associated protein X-1 [Tribolium castaneum]
Btabaci_GLEAN_10026914	BTA022433.1,novel_T013690,novel_T013691,novel_T013692,novel_T013693,novel_T013694,novel_T013695	91.49	85.1	101.68	89.58	63.78	87.3	76.03	67.95	-	-	ko01100//Metabolic pathways;ko00500//Starch and sucrose metabolism;ko00040//Pentose and glucuronate interconversions;ko04976//Bile secretion;ko00983//Drug metabolism - other enzymes;ko00860//Porphyrin and chlorophyll metabolism;ko00830//Retinol metabolism;ko05204//Chemical carcinogenesis;ko00980//Metabolism of xenobiotics by cytochrome P450;ko00053//Ascorbate and aldarate metabolism;ko00982//Drug…	-	-	-	gi|646721422|gb|KDR22770.1|/0/UDP-glucuronosyltransferase 2B1, partial [Zootermopsis nevadensis]
Btabaci_GLEAN_10006602	BTA008838.1	91.44	72.03	108.01	105.9	26.04	28.52	23.65	29.71	-	-	ko00981//Insect hormone biosynthesis	-	-	-	gi|672349272|ref|NP_001288290.1|/3.309e-48/phosphomethylethanolamine N-methyltransferase [Diaphorina citri]
Btabaci_GLEAN_10018643	BTA018536.1,novel_T011276	91.33	86.61	105.12	97.57	81.11	89.71	80.81	82.23	-	-	ko01100//Metabolic pathways;ko05110//Vibrio cholerae infection;ko04145//Phagosome;ko00190//Oxidative phosphorylation;ko04721//Synaptic vesicle cycle;ko05323//Rheumatoid arthritis;ko05120//Epithelial cell signaling in Helicobacter pylori infection;ko04966//Collecting duct acid secretion	-	-	-	gi|121543569|gb|ABM55510.1|/1.4458e-107/putative vacuolar ATP synthase subunit E [Maconellicoccus hirsutus]
Btabaci_GLEAN_10005783	BTA010321.1,novel_T006491	91.19	81.91	85.63	74.76	84.94	110.97	83.66	102.48	-	-	-	-	-	-	gi|768432838|ref|XP_011557759.1|/2.1245e-11/PREDICTED: uncharacterized protein LOC105388529 [Plutella xylostella]
Btabaci_GLEAN_10002778	BTA016288.1,novel_T010215,novel_T010216,novel_T010217	91.08	117.37	108.31	85.37	171.11	164.7	171.13	188.5	-	-	ko00970//Aminoacyl-tRNA biosynthesis	GO:0005737//cytoplasm	GO:0003676//nucleic acid binding;GO:0004816//asparagine-tRNA ligase activity;GO:0005524//ATP binding	GO:0006421//asparaginyl-tRNA aminoacylation	gi|646703171|gb|KDR11987.1|/0/Asparaginyl-tRNA synthetase, cytoplasmic [Zootermopsis nevadensis]
Btabaci_GLEAN_10023004	BTA003563.1,novel_T002457,novel_T002458,novel_T002459,novel_T002460,novel_T002461,novel_T002462,novel_T002463,novel_T002464	90.86	90.8	74	65.95	58.77	27.98	42.42	34.14	-	-	ko04810//Regulation of actin cytoskeleton;ko05205//Proteoglycans in cancer;ko05100//Bacterial invasion of epithelial cells;ko04062//Chemokine signaling pathway;ko04510//Focal adhesion;ko05203//Viral carcinogenesis;ko04670//Leukocyte transendothelial migration;ko04370//VEGF signaling pathway	-	-	-	gi|322784934|gb|EFZ11705.1|/7.1803e-115/hypothetical protein SINV_04419, partial [Solenopsis invicta]
Btabaci_GLEAN_10020298	BTA013785.1	90.81	69.77	137.99	111.96	87.86	142.19	66.42	96.69	-	-	-	-	-	-	gi|411530703|gb|AFW19797.1|/8.91332e-37/diuretic hormone 3-like protein [Nilaparvata lugens]
Btabaci_GLEAN_10021396	BTA009884.1,novel_T006268,novel_T006269,novel_T006270,novel_T006271,novel_T006272,novel_T006273,novel_T006274,novel_T006275	90.57	75.38	111.83	99.66	78.93	59.45	69.15	79.55	-	-	-	-	-	-	gi|952511526|gb|KRT78408.1|/8.01765e-100/hypothetical protein AMK59_8612 [Oryctes borbonicus]
Btabaci_GLEAN_10001658	BTA019247.1,novel_T011578	90.54	85.27	94.2	91.66	80.5	64.38	82.06	75.28	-	-	ko05016//Huntington's disease;ko04144//Endocytosis;ko04721//Synaptic vesicle cycle;ko04961//Endocrine and other factor-regulated calcium reabsorption	-	-	-	gi|501295227|dbj|BAN20844.1|/0/clathrin coat associated protein ap-50 [Riptortus pedestris]
CUFF10.175.1	BTA002311.1,novel_T001518,novel_T001519	90.53	69.52	67.13	87.04	74.29	127.96	73.84	104.77	-	-	ko04142//Lysosome;ko04612//Antigen processing and presentation;ko04924//Renin secretion	-	-	-	gi|939250038|ref|XP_014244566.1|/3.213e-103/PREDICTED: cathepsin B-like [Cimex lectularius]
Btabaci_GLEAN_10025058	BTA022496.2,novel_T013747,novel_T013748,novel_T013749	90.46	90.59	80.85	87.25	86.93	76.54	76.78	77.6	-	-	ko05146//Amoebiasis;ko05169//Epstein-Barr virus infection;ko04810//Regulation of actin cytoskeleton;ko05200//Pathways in cancer;ko05205//Proteoglycans in cancer;ko04015//Rap1 signaling pathway;ko05100//Bacterial invasion of epithelial cells;ko04151//PI3K-Akt signaling pathway;ko04919//Thyroid hormone signaling pathway;ko04510//Focal adhesion;ko04145//Phagosome;ko05131//Shigellosis;ko05206//MicroR…	-	-	-	gi|749734466|ref|XP_011151431.1|/8.54589e-18/PREDICTED: fibril-forming collagen alpha chain-like [Harpegnathos saltator]
Btabaci_GLEAN_10020782	BTA012271.1,novel_T007706	90.3	92.75	88.27	87.65	85.3	92.67	96.87	101.83	-	-	ko04141//Protein processing in endoplasmic reticulum;ko04010//MAPK signaling pathway;ko04932//Non-alcoholic fatty liver disease (NAFLD);ko04722//Neurotrophin signaling pathway;ko04071//Sphingolipid signaling pathway;ko05014//Amyotrophic lateral sclerosis (ALS);ko04668//TNF signaling pathway	-	-	-	gi|939258489|ref|XP_014249053.1|/4.22422e-109/PREDICTED: myophilin [Cimex lectularius]
Btabaci_GLEAN_10015719	BTA024495.1,novel_T014674	89.86	216.22	52.98	60.67	276.15	185.27	300.78	208.98	-	-	ko01100//Metabolic pathways;ko00270//Cysteine and methionine metabolism;ko00430//Taurine and hypotaurine metabolism	-	GO:0046872//metal ion binding;GO:0051213//dioxygenase activity	-	gi|939242383|ref|XP_014240455.1|/2.75446e-96/PREDICTED: cysteine dioxygenase type 1 [Cimex lectularius]
CUFF80.421.1	BTA019382.1	89.72	145.11	79.79	60.2	210.13	234.87	212.32	233.4	-	-	ko03010//Ribosome	GO:0005840//ribosome;GO:0016021//integral component of membrane	GO:0003735//structural constituent of ribosome	GO:0006412//translation	gi|31340370|sp|Q9NB33.3|RL44_OCHTR/5.42174e-67/RecName: Full=60S ribosomal protein L44
Btabaci_GLEAN_10014342	BTA026749.1,novel_T016054	89.67	92.88	75.81	82.32	128.97	112.68	120.96	126.22	-	-	-	-	-	-	gi|662201995|ref|XP_008474273.1|/0/PREDICTED: extracellular serine/threonine protein kinase FAM20C [Diaphorina citri]
Btabaci_GLEAN_10025050	BTA022488.1,novel_T013739,novel_T013740	89.6	123.65	86.37	75.67	175.08	196.56	184.01	205.04	-	-	ko00230//Purine metabolism	-	-	-	gi|646712432|gb|KDR17193.1|/1.28095e-44/ADP-sugar pyrophosphatase [Zootermopsis nevadensis]
Btabaci_GLEAN_10007899	BTA006594.1	89.08	56.32	63.17	71.12	64.58	139.78	55.38	113.04	-	-	ko05146//Amoebiasis;ko05110//Vibrio cholerae infection	-	-	-	gi|557752497|ref|XP_005175997.1|/2.72931e-08/PREDICTED: mucin-2-like [Musca domestica]
Btabaci_GLEAN_10021041	BTA011219.1	88.9	108.02	87.09	87.85	91.63	66.07	90.52	97.13	-	-	ko01100//Metabolic pathways;ko01200//Carbon metabolism;ko00500//Starch and sucrose metabolism;ko00520//Amino sugar and nucleotide sugar metabolism;ko00010//Glycolysis / Gluconeogenesis;ko00030//Pentose phosphate pathway	-	GO:0004347//glucose-6-phosphate isomerase activity	GO:0006094//gluconeogenesis;GO:0006096//glycolytic process	gi|646720592|gb|KDR22253.1|/0/Glucose-6-phosphate isomerase [Zootermopsis nevadensis]
Btabaci_GLEAN_10024994	BTA022919.3,novel_T013942,novel_T013943,novel_T013944,novel_T013945	88.69	120.51	75.77	88.62	113.67	120.71	129.69	118.77	-	-	ko04391//Hippo signaling pathway - fly	-	-	-	gi|759063667|ref|XP_011341218.1|/9.15206e-102/PREDICTED: palmitoyltransferase ZDHHC5 isoform X2 [Cerapachys biroi]
Btabaci_GLEAN_10013924	BTA027290.1,novel_T016389	88.59	78.28	74.32	105.15	80.57	126.32	64.05	94.8	-	-	-	-	-	-	-
Btabaci_GLEAN_10017244	BTA021722.1,novel_T013341	88.4	199.48	57.86	68.63	167.74	77.8	207.57	179.29	-	-	-	-	-	-	gi|817195529|ref|XP_012273305.1|/2.20808e-101/PREDICTED: maternal protein exuperantia [Orussus abietinus]
Btabaci_GLEAN_10001929	BTA018181.1,novel_T011161,novel_T011162	88.23	71.44	77.42	106.24	88.93	142.45	78.72	113.79	-	-	ko04974//Protein digestion and absorption	-	-	-	gi|939630662|ref|XP_014278624.1|/2.80008e-44/PREDICTED: meprin A subunit beta-like [Halyomorpha halys]
Btabaci_GLEAN_10008361	BTA005854.1,novel_T003791	88.11	123.01	82.71	79.48	108.12	97.72	101.7	128.13	-	-	ko01100//Metabolic pathways;ko01230//Biosynthesis of amino acids;ko00250//Alanine, aspartate and glutamate metabolism;ko00220//Arginine biosynthesis	-	-	-	gi|546686267|gb|ERL95612.1|/0/hypothetical protein D910_00038 [Dendroctonus ponderosae]
Btabaci_GLEAN_10003524	BTA014647.1,novel_T009218,novel_T009219	88.06	60.49	113.41	98.59	59.66	26.82	51.16	62.51	-	-	-	-	-	-	gi|939275747|ref|XP_014258317.1|/0/PREDICTED: synapsin [Cimex lectularius]
Btabaci_GLEAN_10017695	BTA020804.1,novel_T012674,novel_T012675	88.06	75.74	86.35	87.37	53.6	47.17	50.7	55.62	-	-	-	-	-	-	gi|985387230|ref|XP_015373845.1|/3.14061e-26/PREDICTED: uncharacterized protein LOC107168824 [Diuraphis noxia]
Btabaci_GLEAN_10011319	BTA001009.1,novel_T000592,novel_T000593	88.05	112.32	100.68	88.13	106.99	109.87	97.08	99.43	-	-	-	-	-	-	gi|801395934|ref|XP_012058444.1|/0/PREDICTED: centrosomal protein of 104 kDa [Atta cephalotes]
Btabaci_GLEAN_10025912	BTA013281.1,novel_T008354	87.98	97.61	83.08	79.75	93.44	55.13	89.36	71	-	-	ko01100//Metabolic pathways;ko01200//Carbon metabolism;ko01212//Fatty acid metabolism;ko00310//Lysine degradation;ko00280//Valine, leucine and isoleucine degradation;ko00380//Tryptophan metabolism;ko00071//Fatty acid degradation;ko00640//Propanoate metabolism;ko00062//Fatty acid elongation;ko00650//Butanoate metabolism;ko00410//beta-Alanine metabolism;ko01040//Biosynthesis of unsaturated fatty ac…	-	-	-	gi|270007934|gb|EFA04382.1|/0/Trifunctional enzyme subunit alpha, mitochondrial-like Protein [Tribolium castaneum]
Btabaci_GLEAN_10024983	BTA022908.1,novel_T013920,novel_T013921	87.69	109.81	63.41	53.83	89.4	64.43	74.31	65.76	-	-	ko01100//Metabolic pathways;ko01200//Carbon metabolism;ko00620//Pyruvate metabolism;ko00010//Glycolysis / Gluconeogenesis;ko04066//HIF-1 signaling pathway;ko04922//Glucagon signaling pathway;ko00020//Citrate cycle (TCA cycle);ko05230//Central carbon metabolism in cancer	-	-	-	gi|998523052|ref|XP_015522636.1|/4.02857e-125/PREDICTED: probable pyruvate dehydrogenase E1 component subunit alpha, mitochondrial isoform X1 [Neodiprion lecontei]
Btabaci_GLEAN_10015162	BTA025480.1,novel_T015210,novel_T015211,novel_T015212	87.61	126.55	80.92	90.76	129.99	93.15	143.37	119.25	-	-	ko04010//MAPK signaling pathway	-	-	-	gi|998506887|ref|XP_015513735.1|/0/PREDICTED: serine/threonine-protein kinase TAO1 [Neodiprion lecontei]
Btabaci_GLEAN_10014720	BTA026181.1,novel_T015625	87.45	82.8	85.39	81.21	75.78	77.29	75.45	84.43	-	-	-	-	-	-	gi|357608073|gb|EHJ65810.1|/3.79179e-32/hypothetical protein KGM_13854 [Danaus plexippus]
Btabaci_GLEAN_10009341	BTA004288.1,novel_T002957	87.38	92.6	86.93	84.86	71.97	47.58	63.28	68.05	-	-	ko04146//Peroxisome	-	-	-	gi|501295651|dbj|BAN20910.1|/0/conserved hypothetical protein [Riptortus pedestris]
Btabaci_GLEAN_10025166	BTA021575.1	87.2	423.87	2.52	20.73	198.88	192.07	482.82	395.35	-	-	ko05146//Amoebiasis;ko05110//Vibrio cholerae infection	-	-	-	gi|572268951|ref|XP_006612507.1|/5.65222e-15/PREDICTED: vegetative cell wall protein gp1-like [Apis dorsata]
Btabaci_GLEAN_10005206	BTA011358.1,novel_T007150	87.18	98.99	87.69	76.55	116.58	84.68	101.23	120.71	-	-	ko01100//Metabolic pathways;ko01200//Carbon metabolism;ko00500//Starch and sucrose metabolism;ko04910//Insulin signaling pathway;ko00052//Galactose metabolism;ko00520//Amino sugar and nucleotide sugar metabolism;ko00010//Glycolysis / Gluconeogenesis;ko04066//HIF-1 signaling pathway;ko05230//Central carbon metabolism in cancer;ko00051//Fructose and mannose metabolism;ko04973//Carbohydrate digestio…	-	-	-	gi|939672464|ref|XP_014282722.1|/0/PREDICTED: hexokinase-2-like isoform X2 [Halyomorpha halys]
Btabaci_GLEAN_10027222	BTA000036.2,novel_T000064,novel_T000065	87.13	89.12	96.55	95.32	78.27	83.23	75.64	86.38	-	-	ko05203//Viral carcinogenesis;ko04390//Hippo signaling pathway;ko04391//Hippo signaling pathway - fly	-	-	-	gi|751210403|ref|XP_011157896.1|/1.2199e-55/PREDICTED: leucine-rich repeat-containing protein 28-like isoform X1 [Solenopsis invicta]
Btabaci_GLEAN_10001683	BTA019200.1	87.11	68.26	86.93	74.72	82.32	99.63	71.1	78.43	-	-	-	-	-	-	gi|646721950|gb|KDR23094.1|/3.09352e-82/INO80 complex subunit E [Zootermopsis nevadensis]
CUFF78.410.1	BTA018964.2	86.9	112.6	79.78	73.21	93.17	74.05	130.39	104.04	-	-	-	-	GO:0008124//4-alpha-hydroxytetrahydrobiopterin dehydratase activity	GO:0006729//tetrahydrobiopterin biosynthetic process	gi|662183677|ref|XP_008467798.1|/3.96023e-59/PREDICTED: pterin-4-alpha-carbinolamine dehydratase [Diaphorina citri]
Btabaci_GLEAN_10005952	BTA010034.1,novel_T006343	86.34	91.07	85.59	78.02	93.9	83.91	89.73	99.65	-	-	-	-	-	-	gi|925676863|gb|KOX74066.1|/2.09473e-134/hypothetical protein WN51_14146 [Melipona quadrifasciata]
CUFF76.37.1	BTA018036.1,novel_T011122,novel_T011123	86.29	108.7	63.41	57.03	89.27	25.41	73.18	46.63	-	-	ko05414//Dilated cardiomyopathy;ko05410//Hypertrophic cardiomyopathy (HCM)	-	-	-	gi|641663217|ref|XP_008182557.1|/0/PREDICTED: twitchin isoform X11 [Acyrthosiphon pisum]
Btabaci_GLEAN_10009210	BTA004529.1,novel_T003073,novel_T003074,novel_T003075,novel_T003076	86.14	62.78	107.28	98.66	63.85	52.84	53.01	60.98	-	-	ko05012//Parkinson's disease;ko05034//Alcoholism;ko04726//Serotonergic synapse;ko04728//Dopaminergic synapse;ko05030//Cocaine addiction;ko04721//Synaptic vesicle cycle;ko05031//Amphetamine addiction	GO:0016021//integral component of membrane	-	GO:0055085//transmembrane transport	gi|925683119|gb|KOX79730.1|/0/Synaptic vesicular amine transporter [Melipona quadrifasciata]
Btabaci_GLEAN_10026492	BTA002347.1	86.09	80.03	65.21	92.49	70.03	118.85	74.78	90.61	-	-	-	-	-	-	gi|194758591|ref|XP_001961545.1|/6.69695e-09/uncharacterized protein Dana_GF14881 [Drosophila ananassae]
Btabaci_GLEAN_10020014	BTA014620.1,novel_T009215	85.75	79.75	97.61	90.23	76.78	123.49	87.28	90.28	-	-	-	-	-	-	gi|998518739|ref|XP_015520270.1|/1.75087e-38/PREDICTED: F-box/WD repeat-containing protein 4-like [Neodiprion lecontei]
Btabaci_GLEAN_10022477	BTA005638.1,novel_T003677	85.6	80.74	71.67	72.76	90.57	102.45	81.9	91.61	-	-	ko01100//Metabolic pathways;ko00130//Ubiquinone and other terpenoid-quinone biosynthesis	-	-	GO:0006744//ubiquinone biosynthetic process;GO:0055114//oxidation-reduction process	gi|506968133|gb|AGM32410.1|/7.42498e-101/ubiquinone biosynthesis protein [Coptotermes formosanus]
Btabaci_GLEAN_10001364	BTA020082.1,novel_T012159	85.4	76.52	80.23	102.23	58.31	99.87	64.02	85.31	-	-	-	-	-	-	gi|909570171|ref|XP_013140620.1|/3.78948e-12/PREDICTED: probable serine/threonine-protein kinase clkA [Papilio polytes]
Btabaci_GLEAN_10003398	BTA015008.1,novel_T009440	85.26	104.62	90.76	80.54	98.33	88.62	90.28	87.96	-	-	-	-	GO:0005198//structural molecule activity;GO:0051536//iron-sulfur cluster binding	GO:0016226//iron-sulfur cluster assembly	gi|936717756|ref|XP_014236806.1|/2.33476e-72/PREDICTED: iron-sulfur cluster assembly 1 homolog, mitochondrial isoform X1 [Trichogramma pretiosum]
Btabaci_GLEAN_10016115	BTA023753.1	84.89	86.89	74.63	69.42	109.29	96.77	105.58	109.65	-	-	ko05146//Amoebiasis;ko05169//Epstein-Barr virus infection;ko04810//Regulation of actin cytoskeleton;ko05200//Pathways in cancer;ko05205//Proteoglycans in cancer;ko04015//Rap1 signaling pathway;ko05100//Bacterial invasion of epithelial cells;ko04151//PI3K-Akt signaling pathway;ko04919//Thyroid hormone signaling pathway;ko04510//Focal adhesion;ko04145//Phagosome;ko05131//Shigellosis;ko05206//MicroR…	-	-	-	gi|926628124|ref|XP_013779665.1|/4.67546e-17/PREDICTED: acanthoscurrin-2-like [Limulus polyphemus]
Btabaci_GLEAN_10023968	BTA029463.1,novel_T017753	84.8	70.55	91.5	81.56	82.12	48.23	75.34	81.05	-	-	-	-	-	-	gi|985399678|ref|XP_015367472.1|/3.24189e-85/PREDICTED: uncharacterized protein ZK1073.1 isoform X2 [Diuraphis noxia]
Btabaci_GLEAN_10015167	BTA025485.1,novel_T015215	84.74	71.98	102.36	87.21	74.89	95.17	66.68	82.99	-	-	ko04976//Bile secretion	GO:0016021//integral component of membrane	-	-	gi|817050759|ref|XP_012254876.1|/0/PREDICTED: transmembrane protein 184B [Athalia rosae]
Btabaci_GLEAN_10026271	BTA006915.1,novel_T004390	84.31	66.93	93.62	100.32	65.2	59.68	63.92	62.1	-	-	-	-	-	-	gi|193631999|ref|XP_001946261.1|/6.07134e-57/PREDICTED: PQ-loop repeat-containing protein 1 [Acyrthosiphon pisum]
Btabaci_GLEAN_10008915	BTA004944.1	84.13	33.08	145.87	148.11	28.34	52.61	17.55	27.1	-	-	ko05146//Amoebiasis;ko05110//Vibrio cholerae infection	-	-	-	gi|817214781|ref|XP_012283589.1|/2.93607e-54/PREDICTED: larval cuticle protein A2B-like [Orussus abietinus]
Btabaci_GLEAN_10020417	BTA013333.1,novel_T008387	83.92	112.66	69.9	62.96	84.34	23.3	79.94	52.34	-	-	ko05205//Proteoglycans in cancer;ko04510//Focal adhesion;ko04010//MAPK signaling pathway;ko05132//Salmonella infection	-	-	-	gi|1000753793|ref|XP_015599804.1|/0/PREDICTED: filamin-A isoform X6 [Cephus cinctus]
Btabaci_GLEAN_10025402	BTA019485.1	83.64	62.35	75.98	71.39	43.68	50.71	24.86	43.74	-	-	-	-	-	-	gi|498938021|ref|XP_004520797.1|/3.31385e-27/PREDICTED: keratin-associated protein 19-2-like [Ceratitis capitata]
Btabaci_GLEAN_10026293	BTA006026.1,novel_T003899	83.29	74.51	94.19	91	75.41	50.37	60.81	81.5	-	-	-	-	-	-	gi|939237069|ref|XP_014259104.1|/7.81927e-119/PREDICTED: facilitated trehalose transporter Tret1-like [Cimex lectularius]
Btabaci_GLEAN_10007648	BTA007012.2,novel_T004456,novel_T004457	83.25	98.52	95.36	79.93	88.93	109.17	96.13	99.02	-	-	ko04120//Ubiquitin mediated proteolysis	-	-	-	gi|646714508|gb|KDR18438.1|/5.64065e-148/Oxidative stress-induced growth inhibitor 2 [Zootermopsis nevadensis]
Btabaci_GLEAN_10009082	BTA004727.1,novel_T003238	83.18	96.72	75.32	72.61	85.22	107.74	91.24	120.19	-	-	ko00190//Oxidative phosphorylation	-	-	-	gi|340713101|ref|XP_003395087.1|/9.43863e-155/PREDICTED: inorganic pyrophosphatase [Bombus terrestris]
Btabaci_GLEAN_10021151	BTA010830.1	83.16	105.59	85.19	81.39	84.68	23.32	84.44	67.41	-	-	ko01100//Metabolic pathways;ko01200//Carbon metabolism;ko00500//Starch and sucrose metabolism;ko04910//Insulin signaling pathway;ko00052//Galactose metabolism;ko00520//Amino sugar and nucleotide sugar metabolism;ko00010//Glycolysis / Gluconeogenesis;ko04066//HIF-1 signaling pathway;ko05230//Central carbon metabolism in cancer;ko00051//Fructose and mannose metabolism;ko04973//Carbohydrate digestio…	-	-	-	gi|768408072|ref|XP_011556377.1|/0/PREDICTED: hexokinase type 2 isoform X4 [Plutella xylostella]
Btabaci_GLEAN_10004040	BTA013626.1,novel_T008587,novel_T008588,novel_T008589	83.06	76.79	111.29	102.37	65.78	54.38	60.9	60.39	-	-	ko03410//Base excision repair	-	-	-	gi|939258553|ref|XP_014249086.1|/7.84633e-141/PREDICTED: DNA-(apurinic or apyrimidinic site) lyase-like [Cimex lectularius]
Btabaci_GLEAN_10016417	BTA023237.1,novel_T014144	83.02	50.27	88.57	80.23	89.38	199	78.53	111.01	-	-	-	-	-	-	-
Btabaci_GLEAN_10020030	BTA014571.1,novel_T009178	82.94	81.69	72.28	74.15	74.68	120.24	64.99	106.2	-	-	ko04142//Lysosome;ko04612//Antigen processing and presentation;ko04924//Renin secretion	-	-	-	gi|939633790|ref|XP_014289457.1|/1.49583e-89/PREDICTED: cathepsin B-like [Halyomorpha halys]
Btabaci_GLEAN_10020294	BTA013845.1,novel_T008739,novel_T008740	82.9	67.26	91.27	85.49	52.36	54.22	50.34	55.68	-	-	-	-	-	-	gi|939279652|ref|XP_014260413.1|/1.62389e-113/PREDICTED: fasciculation and elongation protein zeta-2 [Cimex lectularius]
Btabaci_GLEAN_10012578	BTA029333.1,novel_T017630,novel_T017631,novel_T017632,novel_T017633,novel_T017634,novel_T017635	82.84	98.31	72.13	79.68	101.34	83.24	129.28	116.59	-	-	-	GO:0016021//integral component of membrane	GO:0003676//nucleic acid binding;GO:0022891//substrate-specific transmembrane transporter activity;GO:0046983//protein dimerization activity	GO:0055085//transmembrane transport	gi|641678063|ref|XP_008188015.1|/0/PREDICTED: facilitated trehalose transporter Tret1-like isoform X3 [Acyrthosiphon pisum]
Btabaci_GLEAN_10024273	BTA028059.1	82.58	64.41	100.03	76.84	66.15	59.44	50.74	65.74	-	-	ko01100//Metabolic pathways;ko05110//Vibrio cholerae infection;ko04145//Phagosome;ko00190//Oxidative phosphorylation;ko04721//Synaptic vesicle cycle;ko05323//Rheumatoid arthritis;ko05120//Epithelial cell signaling in Helicobacter pylori infection;ko04966//Collecting duct acid secretion	GO:0033180//proton-transporting V-type ATPase, V1 domain	GO:0046961//proton-transporting ATPase activity, rotational mechanism	GO:0015991//ATP hydrolysis coupled proton transport	gi|817215789|ref|XP_012284002.1|/4.09759e-80/PREDICTED: V-type proton ATPase subunit F isoform X2 [Orussus abietinus]
Btabaci_GLEAN_10013421	BTA028039.1,novel_T016782	82.15	97.72	70.23	64.96	81.87	63.17	67.24	79.48	-	-	-	-	-	-	gi|359843278|gb|AEV89774.1|/6.66397e-102/nuclear protein [Schistocerca gregaria]
Btabaci_GLEAN_10010815	BTA001791.1,novel_T001118,novel_T001119,novel_T001120	82.09	41.98	88.09	80.24	46.67	17.09	36.44	55.98	-	-	ko01100//Metabolic pathways;ko00601//Glycosphingolipid biosynthesis - lacto and neolacto series;ko00533//Glycosaminoglycan biosynthesis - keratan sulfate	-	-	-	gi|939677605|ref|XP_014284541.1|/8.43354e-78/PREDICTED: beta-1,4-glucuronyltransferase 1 isoform X2 [Halyomorpha halys]
Btabaci_GLEAN_10024785	BTA024659.1,novel_T014812,novel_T014813,novel_T014814,novel_T014815	82.01	87.03	123.08	68.79	47.6	96.61	84.65	81.2	-	-	-	-	-	-	gi|662190402|ref|XP_008467965.1|/7.88992e-51/PREDICTED: uncharacterized protein LOC103505414 [Diaphorina citri]
Btabaci_GLEAN_10024500	BTA026330.1,novel_T015784	81.96	64.95	66.86	76.74	78.75	132.44	68.87	96.81	-	-	-	-	-	-	gi|571520782|ref|XP_006568537.1|/1.6472e-35/PREDICTED: protein split ends-like [Apis mellifera]
Btabaci_GLEAN_10023176	BTA002830.1	81.82	94.61	91.8	97.74	93.25	194.47	100.69	146.82	-	-	-	-	-	-	-
Btabaci_GLEAN_10023829	BTA000132.1,novel_T000169	81.59	72.08	87.14	90.08	62.13	46.62	79.86	78.36	-	-	ko05200//Pathways in cancer;ko04510//Focal adhesion;ko05166//HTLV-I infection;ko04120//Ubiquitin mediated proteolysis;ko05145//Toxoplasmosis;ko05222//Small cell lung cancer;ko04210//Apoptosis;ko04064//NF-kappa B signaling pathway	-	-	-	gi|662192917|ref|XP_008469338.1|/1.82269e-116/PREDICTED: putative inhibitor of apoptosis isoform X1 [Diaphorina citri]
Btabaci_GLEAN_10009468	BTA004070.1,novel_T002853,novel_T002854,novel_T002855	81.58	63.41	89.43	107.99	52.18	34.36	28.74	28.13	-	-	ko00981//Insect hormone biosynthesis	-	-	-	gi|631793773|gb|AHZ20738.1|/5.07183e-40/juvenile hormone acid methyltransferase [Diploptera punctata]
Btabaci_GLEAN_10012905	BTA028774.1,novel_T017209,novel_T017210,novel_T017211	81.55	122.08	70.09	71.03	153.59	168.23	141.12	145.97	-	-	ko01100//Metabolic pathways;ko05206//MicroRNAs in cancer;ko00270//Cysteine and methionine metabolism	-	-	-	gi|939266679|ref|XP_014253428.1|/0/PREDICTED: DNA (cytosine-5)-methyltransferase 1-like [Cimex lectularius]
Btabaci_GLEAN_10026135	BTA009098.1,novel_T005752,novel_T005753,novel_T005754,novel_T005755	81.53	56.22	104.31	95.46	49.38	45.8	40.96	50.48	-	-	ko05146//Amoebiasis;ko05110//Vibrio cholerae infection	-	-	-	gi|646724081|gb|KDR24471.1|/0/Major facilitator superfamily domain-containing protein 6 [Zootermopsis nevadensis]
Btabaci_GLEAN_10003885	BTA013963.1,novel_T008824,novel_T008825,novel_T008826,novel_T008827,novel_T008828,novel_T008829,novel_T008830,novel_T008831	81.53	72.7	82.93	86.72	73.71	65.15	71.69	62.77	-	-	-	-	GO:0016740//transferase activity	-	gi|242022015|ref|XP_002431437.1|/0/Bromodomain and PHD finger-containing protein, putative [Pediculus humanus corporis]
Btabaci_GLEAN_10025187	BTA021333.1	81.47	106.65	1.92	0.64	231.29	127.95	230.85	76.38	-	-	ko05146//Amoebiasis;ko05110//Vibrio cholerae infection	-	-	-	gi|572268951|ref|XP_006612507.1|/4.32832e-13/PREDICTED: vegetative cell wall protein gp1-like [Apis dorsata]
Btabaci_GLEAN_10017702	BTA020774.1	81.47	76.43	75.98	68.22	84.64	41.12	76.21	81.04	-	-	ko04142//Lysosome;ko04145//Phagosome;ko05152//Tuberculosis	-	-	-	gi|939272691|ref|XP_014256647.1|/1.50689e-39/PREDICTED: endoglucanase A-like [Cimex lectularius]
Btabaci_GLEAN_10022977	BTA003662.1,novel_T002554,novel_T002555	81.31	103.89	92.82	75.6	106.15	81.5	87	76.25	-	-	-	-	-	-	gi|1004398453|gb|KYB26681.1|/8.2967e-38/hypothetical protein TcasGA2_TC033609 [Tribolium castaneum]
CUFF43.393.1	BTA010268.1,novel_T006449	81.19	44.25	75.3	92.77	45.57	35.9	33.64	34.53	-	-	ko03040//Spliceosome	-	-	-	gi|926653428|ref|XP_013793312.1|/1.72749e-49/PREDICTED: glycine-rich cell wall structural protein 1.0-like, partial [Limulus polyphemus]
Btabaci_GLEAN_10019885	BTA015157.1,novel_T009496,novel_T009497	81.19	76.11	94.12	86.9	71.56	63.3	76.61	69.08	-	-	-	-	GO:0046872//metal ion binding	-	gi|985415544|ref|XP_015373176.1|/2.70845e-81/PREDICTED: AN1-type zinc finger protein 6 [Diuraphis noxia]
Btabaci_GLEAN_10024684	BTA025201.1,novel_T015110,novel_T015111	81.13	59.27	100.05	94.52	78.37	100.39	62.89	89.26	-	-	-	-	-	-	gi|939653719|ref|XP_014275597.1|/7.06447e-101/PREDICTED: uncharacterized MFS-type transporter C09D4.1-like isoform X4 [Halyomorpha halys]
Btabaci_GLEAN_10021148	BTA010827.1	81.12	131.12	87.29	47.85	206.34	243.91	185.84	217.37	-	-	ko00230//Purine metabolism	-	-	-	gi|506969059|gb|AGM32873.1|/2.15134e-46/ADP-sugar pyrophosphatase-like protein [Coptotermes formosanus]
Btabaci_GLEAN_10015501	BTA024931.4,novel_T014983,novel_T014984,novel_T014985,novel_T014986	80.82	90.38	67.66	71.13	96.5	54.86	85.39	76.42	-	-	ko04810//Regulation of actin cytoskeleton;ko05205//Proteoglycans in cancer;ko05100//Bacterial invasion of epithelial cells;ko04062//Chemokine signaling pathway;ko04510//Focal adhesion;ko05203//Viral carcinogenesis;ko04670//Leukocyte transendothelial migration;ko04370//VEGF signaling pathway	-	-	-	gi|322784934|gb|EFZ11705.1|/9.54119e-115/hypothetical protein SINV_04419, partial [Solenopsis invicta]
Btabaci_GLEAN_10004021	BTA013644.1,novel_T008590,novel_T008591	80.72	81.14	73.21	70.24	73.11	80.03	76.49	74.36	-	-	ko04310//Wnt signaling pathway;ko04340//Hedgehog signaling pathway	-	-	-	gi|805827333|ref|XP_003708641.2|/0/PREDICTED: casein kinase I isoform alpha [Megachile rotundata]
CUFF12.94.1	BTA002812.1,novel_T001865,novel_T001866	80.71	77.49	70.24	81.09	90.12	150.97	71.48	103.23	-	-	-	-	-	-	-
Btabaci_GLEAN_10011938	BTA000144.1	80.58	288.98	20.81	32.47	89.75	147.62	161.74	57.3	-	-	ko04142//Lysosome;ko04612//Antigen processing and presentation;ko04924//Renin secretion	-	-	-	gi|501299162|dbj|BAN21462.1|/7.82722e-102/cathepsin B, partial [Riptortus pedestris]
Btabaci_GLEAN_10018209	BTA019534.1	80.46	68.47	46.62	57.04	120.19	123.25	205.22	178.87	-	-	ko03010//Ribosome	GO:0030529//intracellular ribonucleoprotein complex	-	-	gi|668457481|gb|KFB45497.1|/4.82712e-61/60S ribosomal protein L13a [Anopheles sinensis]
Btabaci_GLEAN_10004499	BTA012710.1,novel_T007910	80.43	81.62	76.08	73.12	73.54	60.36	60.74	62.11	-	-	ko04080//Neuroactive ligand-receptor interaction;ko05166//HTLV-I infection	-	-	-	gi|906464376|gb|KNC26212.1|/7.06615e-68/hypothetical protein FF38_05374 [Lucilia cuprina]
Btabaci_GLEAN_10005621	BTA010623.1,novel_T006728	80.41	112.07	82.71	74.04	101.3	113.43	111.77	114.2	-	-	-	-	-	-	gi|646720739|gb|KDR22361.1|/4.56072e-116/Methionine aminopeptidase 2 [Zootermopsis nevadensis]
Btabaci_GLEAN_10002934	BTA015982.1	80.13	64.72	94.3	88.91	73.44	91.14	64.03	67.32	-	-	-	-	-	-	gi|242003810|ref|XP_002422869.1|/8.65992e-153/leucine-rich transmembrane protein, putative [Pediculus humanus corporis]
Btabaci_GLEAN_10015671	BTA024562.1,novel_T014705	80.08	52.52	68.69	65.14	55.13	39.44	42.85	26.9	-	-	-	-	-	-	-
Btabaci_GLEAN_10010726	BTA001940.1,novel_T001245,novel_T001246,novel_T001247,novel_T001248,novel_T001249,novel_T001250,novel_T001251,novel_T001252,novel_T001253	80.06	58.46	94.64	92.71	57.95	53.07	58.39	58.27	-	-	ko05205//Proteoglycans in cancer	-	-	-	gi|939250326|ref|XP_014244720.1|/0/PREDICTED: ankyrin-2-like isoform X4 [Cimex lectularius]
Btabaci_GLEAN_10014353	BTA026744.1,novel_T016051	80.04	110.34	70.61	72.33	75.27	74.93	67.84	70.58	-	-	ko01100//Metabolic pathways;ko00260//Glycine, serine and threonine metabolism;ko00860//Porphyrin and chlorophyll metabolism	GO:0005759//mitochondrial matrix	GO:0003870//5-aminolevulinate synthase activity;GO:0030170//pyridoxal phosphate binding	GO:0006782//protoporphyrinogen IX biosynthetic process	gi|646695734|gb|KDR08456.1|/0/5-aminolevulinate synthase, erythroid-specific, mitochondrial [Zootermopsis nevadensis]
Btabaci_GLEAN_10020522	BTA013031.1,novel_T008180,novel_T008181	79.89	97.27	69.29	57.42	100.82	96.43	145.17	121.93	-	-	ko04977//Vitamin digestion and absorption	-	-	-	gi|985413717|ref|XP_015372345.1|/6.34845e-80/PREDICTED: folate transporter 1-like [Diuraphis noxia]
Btabaci_GLEAN_10003564	BTA014559.3,novel_T009162,novel_T009163	79.8	108.65	52.94	64.02	84.31	104.34	94.71	93.24	-	-	ko04141//Protein processing in endoplasmic reticulum	-	-	-	gi|242015836|ref|XP_002428553.1|/9.36593e-61/translocon-associated protein subunit beta precursor, putative [Pediculus humanus corporis]
Btabaci_GLEAN_10026280	BTA006928.1,novel_T004397,novel_T004398,novel_T004399,novel_T004400,novel_T004401	79.74	69.32	91.53	95.13	80.02	59.3	88.82	71.81	-	-	ko01100//Metabolic pathways;ko01230//Biosynthesis of amino acids;ko00250//Alanine, aspartate and glutamate metabolism;ko00910//Nitrogen metabolism	-	-	-	gi|641675394|ref|XP_008187023.1|/0/PREDICTED: putative glutamate synthase [NADPH] isoform X2 [Acyrthosiphon pisum]
Btabaci_GLEAN_10019007	BTA017828.1	79.48	48.17	104.88	85.44	90.44	127.14	80.21	116.06	-	-	-	-	-	-	gi|998499988|ref|XP_015509910.1|/1.64387e-94/PREDICTED: uncharacterized protein LOC107217060 [Neodiprion lecontei]
Btabaci_GLEAN_10007517	BTA007217.1,novel_T004665	79.13	87.47	79.07	89.13	131.08	144.23	128.98	163.03	-	-	ko01100//Metabolic pathways;ko00350//Tyrosine metabolism;ko00360//Phenylalanine metabolism;ko00130//Ubiquinone and other terpenoid-quinone biosynthesis	-	GO:0003868//4-hydroxyphenylpyruvate dioxygenase activity;GO:0046872//metal ion binding	GO:0009072//aromatic amino acid family metabolic process;GO:0055114//oxidation-reduction process	gi|939242617|ref|XP_014240583.1|/0/PREDICTED: 4-hydroxyphenylpyruvate dioxygenase [Cimex lectularius]
Btabaci_GLEAN_10009273	BTA004414.2,novel_T003030,novel_T003031	78.93	88.24	62.56	76.37	100.54	170.46	99.46	147.12	-	-	-	-	-	-	gi|193083230|ref|NP_001122572.1|/6.10512e-40/protein aurora borealis [Nasonia vitripennis]
Btabaci_GLEAN_10019369	BTA016813.2,novel_T010494	78.85	223.8	27.41	29.1	61.65	90.96	109.82	37.28	-	-	ko04142//Lysosome;ko04612//Antigen processing and presentation;ko04924//Renin secretion	-	-	-	gi|204022106|dbj|BAG71150.1|/1.69602e-88/cathepsin B-N [Astegopteryx spinocephala]
Btabaci_GLEAN_10014011	BTA027190.1,novel_T016351	78.48	85.16	78.62	77.09	87.83	67.2	85.68	85.67	-	-	ko04931//Insulin resistance;ko03320//PPAR signaling pathway;ko04975//Fat digestion and absorption	-	-	-	gi|1000762131|ref|XP_015604121.1|/0/PREDICTED: long-chain fatty acid transport protein 4-like [Cephus cinctus]
Btabaci_GLEAN_10008356	BTA005849.1,novel_T003787	78.31	65.56	103.89	101.62	62.27	29.29	53.28	64.31	-	-	-	-	-	-	gi|646702678|gb|KDR11761.1|/2.70067e-97/Synaptotagmin-16 [Zootermopsis nevadensis]
Btabaci_GLEAN_10013338	BTA028164.1,novel_T016847,novel_T016848,novel_T016849,novel_T016850,novel_T016851	78.21	63.54	76.33	80.71	65.04	62.34	67.2	70.96	-	-	ko04080//Neuroactive ligand-receptor interaction	-	-	-	gi|642911947|ref|XP_008199033.1|/3.65006e-164/PREDICTED: phospholipid scramblase 2 isoform X1 [Tribolium castaneum]
Btabaci_GLEAN_10013019	BTA028570.1,novel_T017062,novel_T017063,novel_T017064,novel_T017065,novel_T017066,novel_T017067,novel_T017068	77.68	134.63	57.76	61.24	112.64	111.26	144.11	119.98	-	-	ko05205//Proteoglycans in cancer;ko03040//Spliceosome;ko05202//Transcriptional misregulation in cancer	-	GO:0000166//nucleotide binding;GO:0016787//hydrolase activity	-	gi|328697425|ref|XP_003240334.1|/8.10864e-150/PREDICTED: ATP-dependent RNA helicase p62-like [Acyrthosiphon pisum]
Btabaci_GLEAN_10014715	BTA026189.1,novel_T015638	77.55	94.9	59.22	56.06	76.97	89.22	68.27	62.3	-	-	ko01100//Metabolic pathways;ko05016//Huntington's disease;ko05010//Alzheimer's disease;ko05012//Parkinson's disease;ko00190//Oxidative phosphorylation;ko04932//Non-alcoholic fatty liver disease (NAFLD)	GO:0005743//mitochondrial inner membrane	GO:0016651//oxidoreductase activity, acting on NAD(P)H	GO:0022904//respiratory electron transport chain	gi|914615290|ref|NP_001298998.1|/5.75407e-36/NADH dehydrogenase [ubiquinone] 1 alpha subcomplex subunit 5 [Papilio xuthus]
Btabaci_GLEAN_10026371	BTA005165.1	77.52	131.75	54.79	61.06	144.63	137.8	191.72	148.75	-	-	ko03010//Ribosome	-	-	-	gi|646697936|gb|KDR09351.1|/4.26424e-99/60S ribosomal protein L23a [Zootermopsis nevadensis]
Btabaci_GLEAN_10025330	BTA020208.1,novel_T012275	77.22	53.34	39.08	35.69	23.19	10.11	11.09	10.3	-	-	ko05146//Amoebiasis;ko05110//Vibrio cholerae infection	-	-	-	gi|815915926|ref|XP_012243150.1|/2.92658e-46/PREDICTED: basic proline-rich protein-like [Bombus impatiens]
Btabaci_GLEAN_10017706	BTA020716.2,novel_T012619,novel_T012620	77.12	55.62	49.03	61.51	54.54	88.97	41.86	60.09	-	-	ko04978//Mineral absorption;ko04977//Vitamin digestion and absorption	-	-	-	gi|328726363|ref|XP_003248866.1|/4.53762e-13/PREDICTED: solute carrier family 46 member 3-like [Acyrthosiphon pisum]
CUFF95.476.1	BTA023117.2,novel_T014048	77	47.14	100.81	103.52	47.31	41.07	37.74	50.59	-	-	-	-	-	-	-
Btabaci_GLEAN_10011170	BTA001221.1	76.72	54.83	75.65	71.26	34.55	23.24	30.64	29.28	-	-	ko04310//Wnt signaling pathway	GO:0016020//membrane	-	-	gi|646691757|gb|KDR07206.1|/0/Cuticlin-1, partial [Zootermopsis nevadensis]
Btabaci_GLEAN_10014170	BTA026966.1,novel_T016180,novel_T016181	76.67	84.85	67.67	67.95	61.98	49.31	49.91	42.82	-	-	-	-	-	-	gi|939265487|ref|XP_014252792.1|/0/PREDICTED: structural maintenance of chromosomes protein 4 isoform X2 [Cimex lectularius]
Btabaci_GLEAN_10014567	BTA026440.1	76.48	121.06	68.22	72.06	113.48	103.57	152.95	118.1	-	-	ko01100//Metabolic pathways;ko01200//Carbon metabolism;ko01230//Biosynthesis of amino acids;ko00030//Pentose phosphate pathway	-	-	-	gi|972182262|ref|XP_015172510.1|/5.99579e-178/PREDICTED: probable transaldolase [Polistes dominula]
Btabaci_GLEAN_10019738	BTA015688.3,novel_T009871,novel_T009872,novel_T009873,novel_T009874,novel_T009875	76.33	73.1	69.49	70.91	78.54	82.14	66.78	70.36	-	-	ko05206//MicroRNAs in cancer	-	-	-	gi|646709150|gb|KDR15158.1|/0/RING finger protein nhl-1 [Zootermopsis nevadensis]
Btabaci_GLEAN_10005551	BTA010747.1,novel_T006808	76.29	52.1	72.76	89.04	77.69	96.45	89.78	98.53	-	-	-	-	-	-	gi|939694967|ref|XP_014291569.1|/4.89905e-74/PREDICTED: apolipoprotein D-like [Halyomorpha halys]
Btabaci_GLEAN_10026354	BTA005146.1	76.27	56.68	100.58	91.7	64.41	20.08	55.99	62.74	-	-	ko01100//Metabolic pathways;ko00230//Purine metabolism;ko05169//Epstein-Barr virus infection;ko05016//Huntington's disease;ko00240//Pyrimidine metabolism;ko05168//Herpes simplex infection;ko03020//RNA polymerase	-	-	-	gi|646709209|gb|KDR15190.1|/8.07651e-96/Protein unzipped [Zootermopsis nevadensis]
Btabaci_GLEAN_10025442	BTA019044.1,novel_T011441,novel_T011442,novel_T011443,novel_T011444,novel_T011445,novel_T011446,novel_T011447	76.23	68.75	96.74	88.28	59.97	54.8	49.57	52.12	-	-	ko01100//Metabolic pathways;ko05110//Vibrio cholerae infection;ko04145//Phagosome;ko00190//Oxidative phosphorylation;ko04721//Synaptic vesicle cycle;ko05323//Rheumatoid arthritis;ko05120//Epithelial cell signaling in Helicobacter pylori infection;ko04966//Collecting duct acid secretion	-	-	-	gi|998500320|ref|XP_015510095.1|/2.19533e-173/PREDICTED: V-type proton ATPase subunit C isoform X2 [Neodiprion lecontei]
Btabaci_GLEAN_10024899	BTA023872.1	76.14	77.18	43.67	73.56	95.87	127.37	68.43	91.56	-	-	ko03010//Ribosome	GO:0022627//cytosolic small ribosomal subunit	GO:0003735//structural constituent of ribosome	GO:0002181//cytoplasmic translation	gi|17975567|ref|NP_524709.1|/2.49816e-82/ribosomal protein S15Aa, isoform D [Drosophila melanogaster]
Btabaci_GLEAN_10026022	BTA010982.1	75.82	54.19	95.72	90.91	51.7	35.99	46.57	49.78	-	-	ko01100//Metabolic pathways;ko00564//Glycerophospholipid metabolism;ko04070//Phosphatidylinositol signaling system;ko00562//Inositol phosphate metabolism	-	-	-	gi|755936680|ref|XP_011296832.1|/8.24046e-121/PREDICTED: CDP-diacylglycerol--inositol 3-phosphatidyltransferase [Fopius arisanus]
Btabaci_GLEAN_10016120	BTA023725.1,novel_T014312	75.76	77.44	108.84	96.2	60.72	14.18	48.17	42.82	-	-	-	-	-	-	gi|861640007|gb|KMQ93041.1|/4.75022e-42/calsyntenin-1-like protein [Lasius niger]
Btabaci_GLEAN_10013057	BTA028539.1,novel_T017039	75.53	95.32	64.52	65.86	84.16	38.28	61.78	71.43	-	-	ko01100//Metabolic pathways;ko01200//Carbon metabolism;ko00620//Pyruvate metabolism;ko00010//Glycolysis / Gluconeogenesis;ko04066//HIF-1 signaling pathway;ko04922//Glucagon signaling pathway;ko00020//Citrate cycle (TCA cycle);ko05230//Central carbon metabolism in cancer	-	GO:0004739//pyruvate dehydrogenase (acetyl-transferring) activity	GO:0006086//acetyl-CoA biosynthetic process from pyruvate;GO:0055114//oxidation-reduction process	gi|752881716|ref|XP_011258474.1|/0/PREDICTED: pyruvate dehydrogenase E1 component subunit beta, mitochondrial [Camponotus floridanus]
Btabaci_GLEAN_10003094	BTA015609.1,novel_T009815,novel_T009816	75.4	66.09	85.52	72.2	55.29	45.58	57.79	61.34	-	-	-	-	-	-	gi|987907518|ref|XP_015429292.1|/1.20513e-38/PREDICTED: cysteine and histidine-rich protein 1 homolog [Dufourea novaeangliae]
Btabaci_GLEAN_10012402	BTA029615.1	75.26	87.89	51.64	36.59	111.17	138.33	104.98	140.04	-	-	ko03010//Ribosome	GO:0005840//ribosome	GO:0003735//structural constituent of ribosome	GO:0006412//translation	gi|646711786|gb|KDR16830.1|/1.42837e-65/60S ribosomal protein L30 [Zootermopsis nevadensis]
Btabaci_GLEAN_10002802	BTA016214.1	75.24	54.41	76	88.38	45.21	59.81	63.78	69.81	-	-	-	-	-	-	gi|195436505|ref|XP_002066208.1|/3.79791e-10/uncharacterized protein Dwil_GK22241 [Drosophila willistoni]
Btabaci_GLEAN_10012286	BTA029772.1	75.1	120.74	51.29	59.95	124.9	156.22	162.94	123.56	-	-	ko03010//Ribosome	-	-	-	gi|663070925|ref|NP_001284608.1|/5.65823e-40/60S ribosomal protein L28-like [Diaphorina citri]
Btabaci_GLEAN_10019298	BTA017047.1	75.1	120.74	51.29	59.95	124.9	156.22	162.94	123.56	-	-	ko03010//Ribosome	-	-	-	gi|663070925|ref|NP_001284608.1|/5.65823e-40/60S ribosomal protein L28-like [Diaphorina citri]
Btabaci_GLEAN_10024296	BTA027714.1,novel_T016731,novel_T016732	75.03	71.26	87.14	87.92	64.82	62.38	53.9	60.98	-	-	ko05414//Dilated cardiomyopathy;ko05410//Hypertrophic cardiomyopathy (HCM);ko05412//Arrhythmogenic right ventricular cardiomyopathy (ARVC);ko05416//Viral myocarditis	-	-	-	gi|572259931|ref|XP_006608296.1|/6.58489e-46/PREDICTED: epsilon-sarcoglycan-like [Apis dorsata]
Btabaci_GLEAN_10024913	BTA023713.1,novel_T014299,novel_T014300,novel_T014301	75.03	65.2	93.55	86.4	61.84	64.83	59.69	65.4	-	-	-	-	-	-	gi|939681674|ref|XP_014285834.1|/0/PREDICTED: ADAMTS-like protein 1 isoform X1 [Halyomorpha halys]
Btabaci_GLEAN_10022447	BTA005798.1	74.88	168.5	50.86	63.94	201.32	263.58	263.38	294.67	-	-	ko03010//Ribosome	GO:0005840//ribosome	GO:0003735//structural constituent of ribosome	GO:0006412//translation	gi|646698025|gb|KDR09401.1|/9.9557e-99/40S ribosomal protein S14 [Zootermopsis nevadensis]
Btabaci_GLEAN_10026548	BTA001285.1,novel_T000755	74.79	49.04	54.62	55.21	54.91	43.54	42.96	43.13	-	-	ko05146//Amoebiasis;ko05110//Vibrio cholerae infection	-	-	-	gi|970882899|ref|XP_015124029.1|/0/PREDICTED: flocculation protein FLO11 [Diachasma alloeum]
Btabaci_GLEAN_10020486	BTA013153.1,novel_T008268,novel_T008269	74.71	55.7	91.17	95.95	55.53	41.5	50.64	54.64	-	-	-	-	-	-	gi|939658581|ref|XP_014277424.1|/0/PREDICTED: kinesin-like protein unc-104 isoform X4 [Halyomorpha halys]
Btabaci_GLEAN_10020547	BTA012949.2,novel_T008136,novel_T008137,novel_T008138	74.71	64.42	86.69	79.71	65.45	40.38	54.24	58.82	-	-	ko05166//HTLV-I infection;ko05203//Viral carcinogenesis;ko04390//Hippo signaling pathway;ko04391//Hippo signaling pathway - fly;ko04660//T cell receptor signaling pathway	-	-	-	gi|817201282|ref|XP_012276380.1|/0/PREDICTED: disks large 1 tumor suppressor protein isoform X12 [Orussus abietinus]
Btabaci_GLEAN_10019975	BTA014717.1	74.69	47.18	84.46	85.44	45.72	36.94	44.51	49.3	-	-	ko01100//Metabolic pathways;ko00500//Starch and sucrose metabolism;ko00052//Galactose metabolism	-	-	-	gi|817214522|ref|XP_012283498.1|/3.21442e-127/PREDICTED: maltase 1-like [Orussus abietinus]
CUFF22.41.1	BTA005009.1,novel_T003358,novel_T003359,novel_T003360	74.53	90.91	88.12	100.14	97.25	109.21	72.98	95.07	-	-	-	-	-	-	gi|826422221|ref|XP_012526102.1|/3.34084e-63/PREDICTED: mitochondrial fission 1 protein [Monomorium pharaonis]
Btabaci_GLEAN_10024609	BTA025691.1	74.2	63.35	65.51	75.56	75.55	69.64	75.13	82.06	-	-	ko03018//RNA degradation;ko05152//Tuberculosis	-	GO:0005524//ATP binding;GO:0032440//2-alkenal reductase [NAD(P)] activity;GO:0051082//unfolded protein binding	GO:0006457//protein folding;GO:0055114//oxidation-reduction process	gi|91077414|ref|XP_975386.1|/0/PREDICTED: heat shock 70 kDa protein cognate 5 [Tribolium castaneum]
Btabaci_GLEAN_10016211	BTA023517.1	74.16	332.61	3.39	15.48	220.99	195.12	516.61	217.97	-	-	ko05146//Amoebiasis;ko05110//Vibrio cholerae infection	-	-	-	gi|572268951|ref|XP_006612507.1|/1.99528e-19/PREDICTED: vegetative cell wall protein gp1-like [Apis dorsata]
Btabaci_GLEAN_10006334	BTA009393.1,novel_T005983,novel_T005984,novel_T005985	73.98	45.91	51.56	73.71	41.64	48.41	40.72	40.31	-	-	ko01100//Metabolic pathways;ko00500//Starch and sucrose metabolism	-	-	-	gi|410718531|gb|AFV79626.1|/7.8323e-67/soluble trehalase [Bemisia tabaci]
Btabaci_GLEAN_10017927	BTA020277.1	73.98	82.01	72.43	76.1	88.81	96.46	99.15	91.72	-	-	ko03015//mRNA surveillance pathway;ko04151//PI3K-Akt signaling pathway;ko04390//Hippo signaling pathway;ko04152//AMPK signaling pathway;ko04391//Hippo signaling pathway - fly;ko04530//Tight junction;ko04114//Oocyte meiosis;ko04261//Adrenergic signaling in cardiomyocytes;ko04728//Dopaminergic synapse;ko04071//Sphingolipid signaling pathway;ko05160//Hepatitis C;ko04350//TGF-beta signaling pathway;k…	-	-	-	gi|801377349|ref|XP_012064513.1|/4.83224e-88/PREDICTED: serine/threonine-protein phosphatase 2A catalytic subunit beta isoform [Atta cephalotes]
Btabaci_GLEAN_10020118	BTA014311.1,novel_T009044,novel_T009045	73.87	94.13	69.86	88.75	82.46	93.95	99.94	92.95	-	-	ko05200//Pathways in cancer;ko04151//PI3K-Akt signaling pathway;ko04141//Protein processing in endoplasmic reticulum;ko04915//Estrogen signaling pathway;ko05215//Prostate cancer;ko04918//Thyroid hormone synthesis;ko04621//NOD-like receptor signaling pathway	-	GO:0005524//ATP binding;GO:0051082//unfolded protein binding	GO:0006457//protein folding;GO:0006950//response to stress	gi|1000203593|gb|KXJ75344.1|/0/hypothetical protein RP20_CCG011939 [Aedes albopictus]
Btabaci_GLEAN_10007362	BTA007515.1,novel_T004820	73.85	78.97	64.84	73.03	78.66	96.12	94.2	93.23	-	-	-	-	-	-	gi|646708859|gb|KDR15006.1|/4.65774e-158/Heterogeneous nuclear ribonucleoprotein H [Zootermopsis nevadensis]
Btabaci_GLEAN_10022887	BTA004000.1,novel_T002800	73.82	61.17	85.11	88.61	69.14	106.86	69.66	70.77	-	-	-	-	-	-	gi|646715616|gb|KDR19152.1|/1.63988e-119/Sorting and assembly machinery component 50-like protein [Zootermopsis nevadensis]
CUFF78.74.3	BTA018642.1,novel_T011322,novel_T011323,novel_T011324	73.76	96.32	56.95	45.77	73.9	36.7	63.64	46.59	-	-	ko00230//Purine metabolism;ko05169//Epstein-Barr virus infection;ko00240//Pyrimidine metabolism;ko03020//RNA polymerase;ko04623//Cytosolic DNA-sensing pathway	-	-	-	gi|328725467|ref|XP_001944283.2|/3.16969e-126/PREDICTED: titin-like isoform X2 [Acyrthosiphon pisum]
Btabaci_GLEAN_10020207	BTA014047.1	73.66	100.86	50.92	58.53	116.06	128.02	115.99	94.73	-	-	ko03010//Ribosome	GO:0005840//ribosome	GO:0003735//structural constituent of ribosome	GO:0006412//translation	gi|240849397|ref|NP_001155817.1|/4.00501e-76/40S ribosomal protein S16-like [Acyrthosiphon pisum]
Btabaci_GLEAN_10026807	BTA026285.1,novel_T015704	73.52	112.94	56.65	50.99	99.83	74.79	111.73	106.05	-	-	ko01100//Metabolic pathways;ko00230//Purine metabolism;ko00500//Starch and sucrose metabolism;ko00052//Galactose metabolism;ko00520//Amino sugar and nucleotide sugar metabolism;ko00010//Glycolysis / Gluconeogenesis;ko00030//Pentose phosphate pathway	-	-	-	gi|641661970|ref|XP_008182079.1|/0/PREDICTED: phosphoglucomutase [Acyrthosiphon pisum]
Btabaci_GLEAN_10004298	BTA013105.1,novel_T008232	73.3	57.48	90.28	83.46	77.85	111.76	50.68	86.34	-	-	-	-	-	-	gi|554894745|gb|AGZ04907.1|/1.28056e-41/odorant binding protein 7 [Sogatella furcifera]
Btabaci_GLEAN_10011144	BTA001366.1,novel_T000833	72.9	93.43	67.67	49.74	94.76	93.76	87.55	89.48	-	-	ko05146//Amoebiasis;ko05169//Epstein-Barr virus infection;ko04810//Regulation of actin cytoskeleton;ko05200//Pathways in cancer;ko05205//Proteoglycans in cancer;ko04015//Rap1 signaling pathway;ko05100//Bacterial invasion of epithelial cells;ko04151//PI3K-Akt signaling pathway;ko04919//Thyroid hormone signaling pathway;ko04510//Focal adhesion;ko04145//Phagosome;ko05131//Shigellosis;ko05206//MicroR…	-	-	-	gi|752875507|ref|XP_011255109.1|/5.73757e-40/PREDICTED: collagen alpha-1(I) chain-like [Camponotus floridanus]
Btabaci_GLEAN_10010724	BTA001946.5,novel_T001263,novel_T001264,novel_T001265,novel_T001266,novel_T001267,novel_T001268,novel_T001269,novel_T001270,novel_T001271	72.86	92.96	71.34	61.2	68.67	41.76	57.88	53.98	-	-	ko01100//Metabolic pathways;ko01200//Carbon metabolism;ko04919//Thyroid hormone signaling pathway;ko01230//Biosynthesis of amino acids;ko04152//AMPK signaling pathway;ko00052//Galactose metabolism;ko03018//RNA degradation;ko00010//Glycolysis / Gluconeogenesis;ko04066//HIF-1 signaling pathway;ko04922//Glucagon signaling pathway;ko00030//Pentose phosphate pathway;ko05230//Central carbon metabolism …	-	-	-	gi|328700025|ref|XP_003241124.1|/0/PREDICTED: 6-phosphofructokinase isoform X4 [Acyrthosiphon pisum]
Btabaci_GLEAN_10024850	BTA024040.1,novel_T014469,novel_T014470	72.57	67.71	75.24	78.59	66.97	86.09	63.28	74.49	-	-	-	-	-	-	gi|939630540|ref|XP_014278216.1|/8.39119e-44/PREDICTED: uncharacterized protein CG1161 [Halyomorpha halys]
Btabaci_GLEAN_10012375	BTA029664.2,novel_T017894,novel_T017895	72.57	57.87	95.31	84.09	55.99	37.71	56.22	55.47	-	-	ko04810//Regulation of actin cytoskeleton;ko05200//Pathways in cancer;ko05206//MicroRNAs in cancer;ko05166//HTLV-I infection;ko04390//Hippo signaling pathway;ko04310//Wnt signaling pathway;ko04550//Signaling pathways regulating pluripotency of stem cells;ko05210//Colorectal cancer;ko05213//Endometrial cancer;ko05217//Basal cell carcinoma	-	-	-	gi|939251287|ref|XP_014245244.1|/3.04365e-173/PREDICTED: adenomatous polyposis coli protein-like isoform X4 [Cimex lectularius]
Btabaci_GLEAN_10015477	BTA024948.3,novel_T014993	72.53	99.5	79.5	77.94	96.08	141.79	99.94	96.77	-	-	ko03320//PPAR signaling pathway	-	GO:0005488	-	gi|646700874|gb|KDR10827.1|/2.13052e-66/hypothetical protein L798_14807 [Zootermopsis nevadensis]
CUFF40.256.2	BTA009422.2	72.39	68.66	69.21	80.74	70.93	118.79	79.65	99.84	-	-	ko05146//Amoebiasis;ko05110//Vibrio cholerae infection	-	-	-	gi|56283929|ref|NP_523475.3|/1.6074e-17/salivary gland secretion 1 [Drosophila melanogaster]
Btabaci_GLEAN_10023707	BTA000779.1,novel_T000473,novel_T000474,novel_T000475	72.36	57.84	67.93	76.1	52.75	36.06	50.56	52.08	-	-	ko04931//Insulin resistance;ko00514//Other types of O-glycan biosynthesis	-	-	-	gi|939634193|ref|XP_014291031.1|/0/PREDICTED: UDP-N-acetylglucosamine--peptide N-acetylglucosaminyltransferase 110 kDa subunit [Halyomorpha halys]
Btabaci_GLEAN_10012353	BTA029682.1,novel_T017909,novel_T017910,novel_T017911,novel_T017912	72.35	73.82	79.16	76.43	83.83	52.71	100.1	85.87	-	-	ko04152//AMPK signaling pathway;ko01212//Fatty acid metabolism;ko04931//Insulin resistance;ko04922//Glucagon signaling pathway;ko00071//Fatty acid degradation;ko03320//PPAR signaling pathway;ko04920//Adipocytokine signaling pathway	-	-	-	gi|817069371|ref|XP_012256657.1|/0/PREDICTED: carnitine O-palmitoyltransferase 1, liver isoform isoform X1 [Athalia rosae]
Btabaci_GLEAN_10026533	BTA001269.1,novel_T000743,novel_T000744	72.3	62.12	73.55	59.91	57.78	86.87	56.85	73.28	-	-	ko03013//RNA transport;ko03015//mRNA surveillance pathway	-	-	-	gi|749732271|ref|XP_011139335.1|/7.91509e-88/PREDICTED: uncharacterized protein LOC105183130 [Harpegnathos saltator]
Btabaci_GLEAN_10014287	BTA026837.2,novel_T016107,novel_T016108	72.11	61.86	91.14	75.93	63.09	62.43	67.18	66.84	-	-	-	-	-	-	gi|939239043|ref|XP_014262228.1|/3.33264e-61/PREDICTED: uncharacterized protein LOC106674173 [Cimex lectularius]
Btabaci_GLEAN_10025661	BTA016327.1,novel_T010235,novel_T010236	72.1	63.37	97.84	93.01	59.97	66.16	59.35	69.49	-	-	ko01100//Metabolic pathways;ko01200//Carbon metabolism;ko00280//Valine, leucine and isoleucine degradation;ko00640//Propanoate metabolism;ko00410//beta-Alanine metabolism	-	-	-	gi|340725245|ref|XP_003400983.1|/7.15853e-129/PREDICTED: 3-hydroxyisobutyryl-CoA hydrolase, mitochondrial isoform X3 [Bombus terrestris]
Btabaci_GLEAN_10013454	BTA028013.1,novel_T016772,novel_T016773,novel_T016774,novel_T016775	72.1	50.52	45.56	64.47	104.11	76.42	156.48	146.51	-	-	ko01100//Metabolic pathways;ko04151//PI3K-Akt signaling pathway;ko04910//Insulin signaling pathway;ko04152//AMPK signaling pathway;ko04931//Insulin resistance;ko00620//Pyruvate metabolism;ko00010//Glycolysis / Gluconeogenesis;ko04068//FoxO signaling pathway;ko04922//Glucagon signaling pathway;ko00020//Citrate cycle (TCA cycle);ko03320//PPAR signaling pathway;ko04920//Adipocytokine signaling pathw…	-	-	-	gi|662216281|ref|XP_008482065.1|/0/PREDICTED: phosphoenolpyruvate carboxykinase [GTP]-like [Diaphorina citri]
Btabaci_GLEAN_10026433	BTA003240.1,novel_T002241	72	56.61	83.68	80.28	70.47	79.74	59.25	74.47	-	-	-	-	-	-	gi|817205391|ref|XP_012278605.1|/1.1062e-78/PREDICTED: transmembrane protein 43 homolog isoform X3 [Orussus abietinus]
Btabaci_GLEAN_10005662	BTA010560.2,novel_T006693,novel_T006694	71.63	72.49	75.44	79.36	62.82	59.8	55.57	58.56	-	-	ko03013//RNA transport	-	-	-	gi|646720070|gb|KDR21937.1|/5.08474e-122/Glyoxalase domain-containing protein 4 [Zootermopsis nevadensis]
Btabaci_GLEAN_10018624	BTA018603.1,novel_T011310	71.61	68.13	75.38	77.87	54.66	37.03	54.85	47.94	-	-	-	-	-	-	gi|939691926|ref|XP_014289973.1|/2.67647e-91/PREDICTED: facilitated trehalose transporter Tret1-like [Halyomorpha halys]
CUFF47.222.1	BTA011166.1,novel_T007018	71.54	104.29	95.91	75.58	125.46	218.06	117.53	150.22	-	-	-	-	-	-	-
Btabaci_GLEAN_10009209	BTA004528.1,novel_T003070,novel_T003071,novel_T003072	71.5	138.49	56.83	60.27	113.31	85.9	172.22	88.94	-	-	-	-	GO:0004842//ubiquitin-protein transferase activity;GO:0008270//zinc ion binding	GO:0016567//protein ubiquitination	gi|646716227|gb|KDR19556.1|/0/Protein ariadne-1 [Zootermopsis nevadensis]
Btabaci_GLEAN_10021855	BTA008060.1	71.45	73.36	79.09	79.34	70.39	84.1	77.8	82.75	-	-	ko04974//Protein digestion and absorption	-	-	-	gi|646685190|gb|KDR03831.1|/8.631e-139/Neutral and basic amino acid transport protein rBAT [Zootermopsis nevadensis]
CUFF24.95.1	BTA005387.1,novel_T003586	71.44	75.77	75.29	57.29	72.67	96.62	74.19	88.69	-	-	ko03010//Ribosome	GO:0005622//intracellular	-	-	gi|815825271|ref|XP_012234007.1|/8.32167e-31/PREDICTED: 39S ribosomal protein L3, mitochondrial [Linepithema humile]
CUFF89.352.1	BTA021380.1,novel_T013120	71.42	69.39	76.12	58.38	77.72	89.68	46.22	61.76	-	-	ko05200//Pathways in cancer;ko05204//Chemical carcinogenesis;ko00980//Metabolism of xenobiotics by cytochrome P450;ko00982//Drug metabolism - cytochrome P450;ko05215//Prostate cancer;ko00480//Glutathione metabolism	-	-	-	gi|646689546|gb|KDR06628.1|/9.95546e-82/Glutathione S-transferase 1-1 [Zootermopsis nevadensis]
Btabaci_GLEAN_10023969	BTA029464.1,novel_T017754,novel_T017755	71.35	73	79.15	76.32	72.32	51.04	61.69	66.53	-	-	-	-	-	-	gi|939269607|ref|XP_014254988.1|/0/PREDICTED: protein hu-li tai shao isoform X9 [Cimex lectularius]
Btabaci_GLEAN_10020028	BTA014569.1,novel_T009169	71.23	66.96	62.05	87.94	64.92	120.07	56.35	92.04	-	-	ko04142//Lysosome;ko04612//Antigen processing and presentation;ko04924//Renin secretion	-	-	-	gi|939250038|ref|XP_014244566.1|/4.57123e-93/PREDICTED: cathepsin B-like [Cimex lectularius]
Btabaci_GLEAN_10023745	BTA000412.1,novel_T000354,novel_T000355	70.99	62.96	79.34	72.22	51.42	33.64	40.13	38.37	-	-	ko01100//Metabolic pathways;ko00500//Starch and sucrose metabolism;ko00052//Galactose metabolism	-	-	-	gi|187097094|ref|NP_001119607.1|/0/sucrase precursor [Acyrthosiphon pisum]
Btabaci_GLEAN_10010533	BTA002267.1	70.56	95	55.45	61.97	71.89	111.47	68.13	76.37	-	-	ko01100//Metabolic pathways;ko05016//Huntington's disease;ko05010//Alzheimer's disease;ko05012//Parkinson's disease;ko00190//Oxidative phosphorylation;ko04932//Non-alcoholic fatty liver disease (NAFLD)	-	-	-	gi|662213609|ref|XP_008480599.1|/1.55717e-22/PREDICTED: NADH dehydrogenase [ubiquinone] 1 beta subcomplex subunit 3 [Diaphorina citri]
Btabaci_GLEAN_10027041	BTA019471.1	70.56	95	55.45	61.97	71.89	111.47	68.13	76.37	-	-	ko01100//Metabolic pathways;ko05016//Huntington's disease;ko05010//Alzheimer's disease;ko05012//Parkinson's disease;ko00190//Oxidative phosphorylation;ko04932//Non-alcoholic fatty liver disease (NAFLD)	-	-	-	gi|662213609|ref|XP_008480599.1|/1.55717e-22/PREDICTED: NADH dehydrogenase [ubiquinone] 1 beta subcomplex subunit 3 [Diaphorina citri]
Btabaci_GLEAN_10017296	BTA021583.1	70.56	95	55.45	61.97	71.89	111.47	68.13	76.37	-	-	ko01100//Metabolic pathways;ko05016//Huntington's disease;ko05010//Alzheimer's disease;ko05012//Parkinson's disease;ko00190//Oxidative phosphorylation;ko04932//Non-alcoholic fatty liver disease (NAFLD)	-	-	-	gi|662213609|ref|XP_008480599.1|/1.55717e-22/PREDICTED: NADH dehydrogenase [ubiquinone] 1 beta subcomplex subunit 3 [Diaphorina citri]
Btabaci_GLEAN_10022920	BTA003936.3,novel_T002769,novel_T002770,novel_T002771,novel_T002772	70.34	61.58	75.74	75.56	61.69	74.11	62.47	74.86	-	-	ko01100//Metabolic pathways;ko00830//Retinol metabolism	-	GO:0003824//catalytic activity	GO:0008152//metabolic process	gi|662196937|ref|XP_008471522.1|/1.6006e-145/PREDICTED: retinol dehydrogenase 12-like isoform X2 [Diaphorina citri]
Btabaci_GLEAN_10012809	BTA028921.1,novel_T017306,novel_T017307	70.33	64.38	91.2	90.96	57.54	90.3	56.45	74.6	-	-	-	-	-	-	gi|939279652|ref|XP_014260413.1|/1.2717e-106/PREDICTED: fasciculation and elongation protein zeta-2 [Cimex lectularius]
Btabaci_GLEAN_10025830	BTA014286.1,novel_T009016,novel_T009017,novel_T009018	70.25	90.87	67.59	64.47	81.35	97.87	83.15	89.21	-	-	ko03013//RNA transport	-	-	-	gi|646707545|gb|KDR14246.1|/1.3227e-165/Eukaryotic translation initiation factor 2 subunit 2 [Zootermopsis nevadensis]
Btabaci_GLEAN_10026234	BTA007665.1,novel_T004913	70.07	64.8	91.6	82.62	69.49	36.1	71.53	77.82	-	-	-	GO:0016021//integral component of membrane	GO:0004222//metalloendopeptidase activity	GO:0006508//proteolysis	gi|193693010|ref|XP_001950596.1|/0/PREDICTED: neprilysin-2 [Acyrthosiphon pisum]
Btabaci_GLEAN_10015536	BTA024881.1,novel_T014963	69.98	66.13	63.01	62.64	105.28	93.51	69.85	104.19	-	-	ko01100//Metabolic pathways;ko00670//One carbon pool by folate	GO:0005739//mitochondrion	GO:0042030//ATPase inhibitor activity	GO:0032780//negative regulation of ATPase activity	gi|646722656|gb|KDR23587.1|/6.89351e-41/ATPase inhibitor mai-2, mitochondrial [Zootermopsis nevadensis]
CUFF84.401.2	BTA020283.1	69.95	80.1	55.55	81.01	108.79	123.82	141.41	145.3	-	-	ko05020//Prion diseases	-	-	-	gi|939653524|ref|XP_014275532.1|/0/PREDICTED: stress-induced-phosphoprotein 1 [Halyomorpha halys]
Btabaci_GLEAN_10024904	BTA023706.1	69.87	33.06	63.6	56.52	50.58	32.55	38.89	48.75	-	-	ko01100//Metabolic pathways;ko00380//Tryptophan metabolism	-	-	-	gi|939246748|ref|XP_014242794.1|/5.64759e-57/PREDICTED: dopamine N-acetyltransferase-like isoform X2 [Cimex lectularius]
Btabaci_GLEAN_10021064	BTA011170.1,novel_T007024,novel_T007025	69.66	68.5	91.11	94.95	60.93	40.67	40.65	53.53	-	-	-	-	-	-	gi|158286559|ref|XP_308808.4|/1.46357e-79/AGAP006948-PB [Anopheles gambiae str. PEST]
Btabaci_GLEAN_10020391	BTA013491.2,novel_T008527,novel_T008528,novel_T008529,novel_T008530,novel_T008531	69.66	56.76	59.04	62.57	57.11	54.03	53.35	62.06	-	-	-	GO:0005622//intracellular	GO:0005215//transporter activity	GO:0006810//transport	gi|242006603|ref|XP_002424139.1|/2.3717e-163/conserved hypothetical protein [Pediculus humanus corporis]
Btabaci_GLEAN_10011952	BTA030198.1,novel_T018146,novel_T018147,novel_T018148,novel_T018149	69.54	208.61	21.98	45.48	122.83	111.39	169.3	116.95	-	-	ko04142//Lysosome	-	-	-	gi|357619726|gb|EHJ72185.1|/4.4499e-143/cathepsin [Danaus plexippus]
Btabaci_GLEAN_10003058	BTA015658.1,novel_T009843,novel_T009844,novel_T009845,novel_T009846	69.3	72.59	85.12	59.46	69.12	42.11	77.97	72	-	-	ko05168//Herpes simplex infection;ko03040//Spliceosome	-	-	-	gi|939262094|ref|XP_014250962.1|/5.99163e-49/PREDICTED: serine-arginine protein 55 isoform X2 [Cimex lectularius]
Btabaci_GLEAN_10013089	BTA028486.1	69.27	82.02	80.3	76.53	78.44	115.03	87.8	84.74	-	-	ko01100//Metabolic pathways;ko04142//Lysosome;ko00531//Glycosaminoglycan degradation	-	GO:0003824//catalytic activity	-	gi|646705163|gb|KDR13030.1|/2.13884e-171/N-acetylglucosamine-6-sulfatase [Zootermopsis nevadensis]
Btabaci_GLEAN_10022571	BTA005354.1,novel_T003571	69.25	49.46	83.97	86.39	47.92	38.17	40.17	48.55	-	-	ko04721//Synaptic vesicle cycle;ko04727//GABAergic synapse;ko04962//Vasopressin-regulated water reabsorption	-	-	-	gi|913297596|ref|XP_013188913.1|/0/PREDICTED: vesicle-fusing ATPase 1-like [Amyelois transitella]
Btabaci_GLEAN_10012676	BTA029199.1,novel_T017567,novel_T017568	69.21	56.01	92.9	89.58	47.94	40.66	52.29	53.45	-	-	ko04391//Hippo signaling pathway - fly;ko04530//Tight junction	-	-	-	gi|641661148|ref|XP_008181773.1|/0/PREDICTED: inactivation-no-after-potential D protein isoform X3 [Acyrthosiphon pisum]
Btabaci_GLEAN_10015083	BTA025605.1	69.19	93.65	54.26	55.69	105.29	122.44	133.83	104.98	-	-	ko03008//Ribosome biogenesis in eukaryotes	-	-	-	gi|646704239|gb|KDR12537.1|/0/putative nucleolar GTP-binding protein 1 [Zootermopsis nevadensis]
Btabaci_GLEAN_10025326	BTA020204.1,novel_T012264	69.15	59.08	66.75	72.2	62.71	70.94	69.06	76.85	-	-	-	-	GO:0004672//protein kinase activity;GO:0005524//ATP binding	GO:0006468//protein phosphorylation	gi|985401677|ref|XP_015368568.1|/0/PREDICTED: LOW QUALITY PROTEIN: serine/threonine-protein kinase 26 [Diuraphis noxia]
Btabaci_GLEAN_10002691	BTA016516.3,novel_T010343,novel_T010344	69.13	60.39	81.3	74.72	59.42	43.72	73.92	74.97	-	-	ko04320//Dorso-ventral axis formation	-	-	-	gi|939266334|ref|XP_014253243.1|/1.58615e-94/PREDICTED: protein spire isoform X2 [Cimex lectularius]
Btabaci_GLEAN_10017264	BTA021657.1,novel_T013319	69.1	47.74	96.98	83.33	47.03	34.23	41.63	50.77	-	-	ko04919//Thyroid hormone signaling pathway;ko05206//MicroRNAs in cancer;ko04320//Dorso-ventral axis formation;ko05020//Prion diseases;ko04330//Notch signaling pathway	-	-	-	gi|939629586|ref|XP_014275104.1|/0/PREDICTED: fibropellin-1 [Halyomorpha halys]
Btabaci_GLEAN_10016097	BTA023765.1,novel_T014331,novel_T014332,novel_T014333	69.05	73.57	52.08	75.76	60.15	109.13	62.14	90.86	-	-	-	-	-	-	-
Btabaci_GLEAN_10024765	BTA024826.3,novel_T014919,novel_T014920,novel_T014921,novel_T014922,novel_T014923,novel_T014924	68.98	70.37	65.52	63.99	56.21	56.16	49.16	59.34	-	-	ko05016//Huntington's disease;ko04142//Lysosome;ko04144//Endocytosis;ko05100//Bacterial invasion of epithelial cells;ko04721//Synaptic vesicle cycle;ko04961//Endocrine and other factor-regulated calcium reabsorption	-	-	-	gi|817208254|ref|XP_012280128.1|/6.40587e-82/PREDICTED: clathrin light chain isoform X2 [Orussus abietinus]
Btabaci_GLEAN_10024316	BTA027604.1	68.85	58.51	89.12	82.27	53.71	39.25	59.48	49.63	-	-	-	-	-	-	gi|817185548|ref|XP_012287239.1|/1.77097e-87/PREDICTED: MAP kinase-activating death domain protein isoform X1 [Orussus abietinus]
Btabaci_GLEAN_10020764	BTA012251.1	68.76	53.85	55	65.67	65.68	99.17	58.48	86.46	-	-	-	-	-	-	gi|939639292|ref|XP_014295036.1|/3.73644e-17/PREDICTED: arginine/serine-rich protein PNISR [Microplitis demolitor]
Btabaci_GLEAN_10024440	BTA026831.1,novel_T016099	68.71	63.04	67.64	66.52	62.86	53.06	53.87	59.64	-	-	ko05146//Amoebiasis;ko05110//Vibrio cholerae infection	-	-	-	gi|91076860|ref|XP_974922.1|/5.27624e-149/PREDICTED: zinc finger protein Noc [Tribolium castaneum]
Btabaci_GLEAN_10023977	BTA029473.1,novel_T017765,novel_T017766,novel_T017767,novel_T017768,novel_T017769,novel_T017770	68.69	86.45	59.3	55.49	74.66	32.32	64.04	49.68	-	-	ko04810//Regulation of actin cytoskeleton;ko04510//Focal adhesion;ko04611//Platelet activation;ko04022//cGMP-PKG signaling pathway;ko04020//Calcium signaling pathway;ko04270//Vascular smooth muscle contraction;ko04921//Oxytocin signaling pathway;ko04971//Gastric acid secretion	-	-	-	gi|969504815|ref|XP_015051361.1|/0/uncharacterized protein Dyak_GE14115, isoform H [Drosophila yakuba]
Btabaci_GLEAN_10019291	BTA017099.3,novel_T010643	68.67	50.87	81.46	78.63	63.47	103.24	48.94	81.41	-	-	ko05146//Amoebiasis;ko05110//Vibrio cholerae infection	-	-	-	-
Btabaci_GLEAN_10002394	BTA017148.2,novel_T010681	68.65	40.19	66.22	83.01	48.47	14.71	41.74	55.62	-	-	ko01100//Metabolic pathways;ko05231//Choline metabolism in cancer;ko04072//Phospholipase D signaling pathway;ko00564//Glycerophospholipid metabolism;ko04070//Phosphatidylinositol signaling system;ko00561//Glycerolipid metabolism	-	-	-	gi|478254206|gb|ENN74471.1|/8.19284e-21/hypothetical protein YQE_08917, partial [Dendroctonus ponderosae]
Btabaci_GLEAN_10023069	BTA003293.1,novel_T002301,novel_T002302	68.06	75.86	54.9	55.56	59.26	47.52	60.2	49.07	-	-	-	-	-	-	gi|1000750468|ref|XP_015598065.1|/1.58598e-75/PREDICTED: trimeric intracellular cation channel type B [Cephus cinctus]
Btabaci_GLEAN_10021679	BTA008689.1,novel_T005546,novel_T005547	67.9	54.49	106.09	97.1	60	55.16	48.12	56.87	-	-	ko01100//Metabolic pathways;ko00380//Tryptophan metabolism	-	-	-	gi|755936716|ref|XP_011296842.1|/5.70928e-27/PREDICTED: dopamine N-acetyltransferase-like isoform X4 [Fopius arisanus]
Btabaci_GLEAN_10002763	BTA016373.1,novel_T010281	67.89	49.47	91.57	93.48	48.52	33.97	38.77	40.12	-	-	ko04727//GABAergic synapse	GO:0016021//integral component of membrane	GO:0005328//neurotransmitter:sodium symporter activity	GO:0006836//neurotransmitter transport;GO:0055085//transmembrane transport	gi|646707047|gb|KDR13981.1|/0/Sodium- and chloride-dependent GABA transporter 1 [Zootermopsis nevadensis]
Btabaci_GLEAN_10021644	BTA008802.1	67.78	80.23	72.84	72.54	78.93	114.54	88.74	105.43	-	-	ko05200//Pathways in cancer;ko05204//Chemical carcinogenesis;ko00980//Metabolism of xenobiotics by cytochrome P450;ko00982//Drug metabolism - cytochrome P450;ko05215//Prostate cancer;ko00480//Glutathione metabolism	-	GO:0016740//transferase activity	-	gi|480310425|gb|AGJ76541.1|/3.63369e-149/glutathione S-transferase [Bemisia tabaci]
Btabaci_GLEAN_10005994	BTA009962.1,novel_T006301	67.77	52.64	66.33	57.95	50.55	53.37	50.15	46.24	-	-	ko01100//Metabolic pathways;ko00230//Purine metabolism;ko05169//Epstein-Barr virus infection;ko05016//Huntington's disease;ko00240//Pyrimidine metabolism;ko05168//Herpes simplex infection;ko03020//RNA polymerase	-	-	-	gi|1000752736|ref|XP_015599256.1|/4.53377e-38/PREDICTED: alpha-tocopherol transfer protein-like [Cephus cinctus]
CUFF124.451.2	BTA030170.2	67.76	107.91	70.38	76.23	93.32	71.67	94.32	111.95	-	-	ko01100//Metabolic pathways;ko00790//Folate biosynthesis	-	-	-	gi|826413248|ref|XP_012543728.1|/4.991e-120/PREDICTED: dihydropteridine reductase [Monomorium pharaonis]
Btabaci_GLEAN_10006015	BTA009928.1,novel_T006287	67.74	101.22	74.61	59.92	78.24	105.92	82.77	87.05	-	-	ko03010//Ribosome	-	-	-	gi|240849097|ref|NP_001155822.1|/5.53217e-33/39S ribosomal protein L27, mitochondrial [Acyrthosiphon pisum]
Btabaci_GLEAN_10023603	BTA001166.1	67.7	79.01	33.16	39.37	19.01	44.81	25.91	28.52	-	-	-	-	-	-	gi|321467016|gb|EFX78008.1|/5.14876e-09/hypothetical protein DAPPUDRAFT_105663 [Daphnia pulex]
Btabaci_GLEAN_10003685	BTA014355.1,novel_T009073,novel_T009074,novel_T009075,novel_T009076,novel_T009077,novel_T009078	67.57	57.01	90.76	81.54	47.84	72.79	46.49	56.76	-	-	ko01100//Metabolic pathways;ko00010//Glycolysis / Gluconeogenesis;ko00562//Inositol phosphate metabolism	-	-	-	gi|646715431|gb|KDR19043.1|/4.32795e-105/Multiple inositol polyphosphate phosphatase 1 [Zootermopsis nevadensis]
Btabaci_GLEAN_10020431	BTA013347.1,novel_T008408,novel_T008409,novel_T008410,novel_T008411,novel_T008412,novel_T008413	67.56	69.9	43.74	43.57	56.22	20.07	46.33	31.02	-	-	ko05205//Proteoglycans in cancer;ko04510//Focal adhesion;ko04010//MAPK signaling pathway;ko05132//Salmonella infection	-	-	-	gi|1000753789|ref|XP_015599802.1|/0/PREDICTED: filamin-A isoform X4 [Cephus cinctus]
Btabaci_GLEAN_10021845	BTA008146.1	67.55	76.96	56.75	48.73	114.31	93.3	123.55	133.37	-	-	ko05146//Amoebiasis;ko05110//Vibrio cholerae infection	-	-	-	gi|56283929|ref|NP_523475.3|/5.7067e-25/salivary gland secretion 1 [Drosophila melanogaster]
Btabaci_GLEAN_10023439	BTA001913.1,novel_T001239,novel_T001240,novel_T001241	67.49	95.93	62.8	62.32	95.82	84.02	72.71	72.56	-	-	-	-	-	-	gi|939655194|ref|XP_014276143.1|/4.7179e-64/PREDICTED: pleckstrin homology domain-containing family A member 3-like isoform X1 [Halyomorpha halys]
Btabaci_GLEAN_10025307	BTA020484.1,novel_T012477,novel_T012478,novel_T012479,novel_T012480,novel_T012481,novel_T012482,novel_T012483,novel_T012484,novel_T012485,novel_T012486,novel_T012487,novel_T012488,novel_T012489	67.34	55.16	88.08	77.55	46.33	59.63	51.43	61.8	-	-	-	-	-	-	gi|914573360|gb|KOB75928.1|/3.2606e-106/Uncharacterized protein OBRU01_06696 [Operophtera brumata]
Btabaci_GLEAN_10024895	BTA023870.4,novel_T014398,novel_T014399,novel_T014400,novel_T014401	67.32	69.23	51.77	46.07	66.33	75.3	72.56	81.76	-	-	-	-	-	-	gi|939238527|ref|XP_014261955.1|/2.62578e-153/PREDICTED: uncharacterized protein LOC106674035 isoform X1 [Cimex lectularius]
Btabaci_GLEAN_10022608	BTA005185.1,novel_T003462,novel_T003463,novel_T003464,novel_T003465	67.23	51.27	54.74	68.14	45.19	31.53	65.19	56.8	-	-	ko04010//MAPK signaling pathway;ko05202//Transcriptional misregulation in cancer;ko04726//Serotonergic synapse	-	GO:0008138//protein tyrosine/serine/threonine phosphatase activity	GO:0006470//protein dephosphorylation	gi|998495865|ref|XP_015523620.1|/6.54482e-96/PREDICTED: dual specificity protein phosphatase 10-like isoform X1 [Neodiprion lecontei]
Btabaci_GLEAN_10001800	BTA018877.1,novel_T011338	67.22	63.01	62.92	65.63	55.04	80.85	54.97	67.07	-	-	ko01100//Metabolic pathways;ko00500//Starch and sucrose metabolism;ko00040//Pentose and glucuronate interconversions;ko04976//Bile secretion;ko00983//Drug metabolism - other enzymes;ko00860//Porphyrin and chlorophyll metabolism;ko00830//Retinol metabolism;ko05204//Chemical carcinogenesis;ko00980//Metabolism of xenobiotics by cytochrome P450;ko00053//Ascorbate and aldarate metabolism;ko00982//Drug…	-	-	-	gi|646718153|gb|KDR20744.1|/3.22173e-146/UDP-glucuronosyltransferase 2B1 [Zootermopsis nevadensis]
Btabaci_GLEAN_10019393	BTA016779.1,novel_T010480,novel_T010481	67.1	102.39	51.51	51.37	110.3	128.78	128.41	120.98	-	-	-	-	-	-	gi|646712524|gb|KDR17256.1|/3.38477e-110/Lamin-B receptor [Zootermopsis nevadensis]
Btabaci_GLEAN_10008064	BTA006328.1,novel_T004016	67.06	128.94	54.39	58.54	113.9	95.74	124.65	113.48	-	-	ko05168//Herpes simplex infection	-	-	-	gi|751451680|ref|XP_011180178.1|/1.02071e-99/PREDICTED: complement component 1 Q subcomponent-binding protein, mitochondrial [Bactrocera cucurbitae]
Btabaci_GLEAN_10004176	BTA013367.1	67.04	59.82	93.98	83.8	50.83	10.38	38.57	31.95	-	-	ko04919//Thyroid hormone signaling pathway;ko04024//cAMP signaling pathway;ko04022//cGMP-PKG signaling pathway;ko04974//Protein digestion and absorption;ko04976//Bile secretion;ko04970//Salivary secretion;ko04261//Adrenergic signaling in cardiomyocytes;ko04972//Pancreatic secretion;ko04971//Gastric acid secretion;ko04978//Mineral absorption;ko04911//Insulin secretion;ko04918//Thyroid hormone synt…	GO:0016021//integral component of membrane	-	GO:0015672//monovalent inorganic cation transport;GO:0030001//metal ion transport	gi|193654811|ref|XP_001950178.1|/1.15158e-121/PREDICTED: sodium/potassium-transporting ATPase subunit beta-2-like [Acyrthosiphon pisum]
Btabaci_GLEAN_10001002	BTA021450.1,novel_T013149	66.9	62.27	53.74	78.54	73.88	56.64	92.93	81.47	-	-	ko04141//Protein processing in endoplasmic reticulum	-	-	-	gi|646715814|gb|KDR19282.1|/0/Heat shock 70 kDa protein 4L [Zootermopsis nevadensis]
Btabaci_GLEAN_10001372	BTA020057.1,novel_T012145,novel_T012146	66.83	63.63	95.71	77.9	49.66	39.2	41.8	38.17	-	-	ko00983//Drug metabolism - other enzymes	-	-	-	gi|157366840|gb|ABV45411.1|/0/COE2, partial [Bemisia tabaci]
Btabaci_GLEAN_10025344	BTA020222.1,novel_T012296	66.8	53.55	72.08	75.39	48.31	42.67	38.2	44.63	-	-	ko04144//Endocytosis;ko04015//Rap1 signaling pathway;ko04611//Platelet activation;ko04910//Insulin signaling pathway;ko04390//Hippo signaling pathway;ko04391//Hippo signaling pathway - fly;ko04530//Tight junction	-	GO:0005215//transporter activity	GO:0044765//single-organism transport	gi|157138629|ref|XP_001664287.1|/2.64911e-79/AAEL003899-PA [Aedes aegypti]
Btabaci_GLEAN_10023114	BTA003076.1,novel_T002067,novel_T002068,novel_T002069,novel_T002070	66.71	55.31	85.04	65.96	53.27	31.07	43.91	55.79	-	-	-	-	-	-	gi|307168289|gb|EFN61495.1|/3.16753e-22/TRAF-interacting protein [Camponotus floridanus]
Btabaci_GLEAN_10019749	BTA015600.1	66.49	59.73	82.81	61.44	52.97	11.99	43.25	52.19	-	-	-	-	-	-	gi|646714522|gb|KDR18452.1|/1.51822e-47/hypothetical protein L798_07455 [Zootermopsis nevadensis]
Btabaci_GLEAN_10020985	BTA011371.1	66.48	53.09	42.33	64.83	47.18	63.97	43.47	51.72	-	-	ko01100//Metabolic pathways;ko00500//Starch and sucrose metabolism;ko00052//Galactose metabolism	-	-	-	gi|646685191|gb|KDR03832.1|/2.25922e-153/Maltase 1, partial [Zootermopsis nevadensis]
Btabaci_GLEAN_10025392	BTA019923.1	66.45	66.98	63.31	62.24	62.81	62.19	61.41	62.79	-	-	ko04140//Regulation of autophagy	-	-	-	gi|646714659|gb|KDR18549.1|/0/Beclin-1-like protein [Zootermopsis nevadensis]
Btabaci_GLEAN_10026528	BTA001263.1,novel_T000741,novel_T000742	66.38	46.95	80.55	76.99	54.67	42.69	47.8	48.79	-	-	-	-	GO:0016757//transferase activity, transferring glycosyl groups	-	gi|242004283|ref|XP_002423034.1|/4.66549e-144/glucuronyltransferase-S, putative [Pediculus humanus corporis]
Btabaci_GLEAN_10004854	BTA012034.1,novel_T007555,novel_T007556,novel_T007557,novel_T007558	66.17	75.23	69.64	67.44	73.67	62.75	71.45	74.32	-	-	ko05168//Herpes simplex infection;ko03040//Spliceosome;ko05206//MicroRNAs in cancer;ko05203//Viral carcinogenesis	-	-	-	gi|646714767|gb|KDR18621.1|/9.09996e-104/Heterogeneous nuclear ribonucleoprotein K [Zootermopsis nevadensis]
Btabaci_GLEAN_10020748	BTA012234.1,novel_T007685	66.1	67.96	71.36	40.82	59.71	87.91	51.18	73.97	-	-	ko01100//Metabolic pathways;ko05016//Huntington's disease;ko05010//Alzheimer's disease;ko05012//Parkinson's disease;ko00190//Oxidative phosphorylation;ko04932//Non-alcoholic fatty liver disease (NAFLD)	-	-	-	gi|924555259|gb|ALC40532.1|/5.60768e-42/CG7712 [Drosophila busckii]
Btabaci_GLEAN_10016840	BTA022371.1,novel_T013635	66.07	122.45	50.46	58.38	110.89	122.78	162.76	119.55	-	-	ko05322//Systemic lupus erythematosus	-	-	-	gi|939685952|ref|XP_014287224.1|/5.13582e-103/PREDICTED: la protein homolog [Halyomorpha halys]
Btabaci_GLEAN_10016121	BTA023726.1	66.04	61.06	87.89	87.1	46.2	12.91	56.87	45.4	-	-	-	-	-	-	gi|501293660|dbj|BAN20631.1|/3.5258e-59/calsyntenin-1 precursor [Riptortus pedestris]
CUFF120.185.2	BTA029349.1,novel_T017654	66.03	32.95	63.68	70.29	41.56	65.51	47.32	79.5	-	-	-	-	-	-	gi|563425734|gb|AHB59658.1|/1.39336e-35/odorant-binding protein 5 [Sogatella furcifera]
CUFF84.486.1	BTA020309.1	65.96	52.9	68.1	73.97	49.55	54.82	47.67	61.36	-	-	ko00564//Glycerophospholipid metabolism	-	GO:0016787//hydrolase activity	-	gi|646701394|gb|KDR11136.1|/4.5248e-119/Acyl-protein thioesterase 1 [Zootermopsis nevadensis]
Btabaci_GLEAN_10023395	BTA001976.1,novel_T001274	65.9	40.3	78.54	73.1	63.79	97.02	48.75	75.57	-	-	-	-	-	-	gi|646715734|gb|KDR19238.1|/1.02117e-08/hypothetical protein L798_06293 [Zootermopsis nevadensis]
Btabaci_GLEAN_10021047	BTA011225.1,novel_T007072	65.83	60.77	90.83	82.35	59.91	62.21	57.37	62.15	-	-	ko05146//Amoebiasis;ko05016//Huntington's disease;ko05200//Pathways in cancer;ko04015//Rap1 signaling pathway;ko05010//Alzheimer's disease;ko04611//Platelet activation;ko04022//cGMP-PKG signaling pathway;ko04020//Calcium signaling pathway;ko04724//Glutamatergic synapse;ko04970//Salivary secretion;ko04726//Serotonergic synapse;ko04261//Adrenergic signaling in cardiomyocytes;ko04270//Vascular smoot…	-	-	-	gi|607367644|gb|EZA61783.1|/0/Guanine nucleotide-binding protein G(q) subunit alpha [Cerapachys biroi]
Btabaci_GLEAN_10003297	BTA015175.2,novel_T009501,novel_T009502	65.71	73.49	57.71	48.19	86.65	91.67	107.72	94.3	-	-	-	-	-	-	gi|646723534|gb|KDR24108.1|/7.79349e-179/Peroxidase [Zootermopsis nevadensis]
Btabaci_GLEAN_10026108	BTA009071.1	65.62	199.49	1.19	4.12	264.4	145.33	336.29	118.09	-	-	ko01100//Metabolic pathways;ko01200//Carbon metabolism;ko01230//Biosynthesis of amino acids;ko00250//Alanine, aspartate and glutamate metabolism;ko01210//2-Oxocarboxylic acid metabolism;ko00220//Arginine biosynthesis	-	-	-	gi|572268951|ref|XP_006612507.1|/1.69453e-14/PREDICTED: vegetative cell wall protein gp1-like [Apis dorsata]
Btabaci_GLEAN_10008068	BTA006332.1	65.48	131.26	73.47	81.25	105.79	102.85	71.71	112.38	-	-	ko01100//Metabolic pathways;ko00230//Purine metabolism;ko00240//Pyrimidine metabolism	-	-	-	gi|807015686|ref|XP_004517938.2|/3.57608e-92/PREDICTED: nucleoside diphosphate kinase [Ceratitis capitata]
Btabaci_GLEAN_10026645	BTA029095.1,novel_T017429	65.44	47.75	84.18	58.24	39.31	12.02	24.61	38.45	-	-	ko04727//GABAergic synapse	GO:0016020//membrane	GO:0015293//symporter activity	GO:0006810//transport	gi|646707047|gb|KDR13981.1|/3.23336e-55/Sodium- and chloride-dependent GABA transporter 1 [Zootermopsis nevadensis]
Btabaci_GLEAN_10017711	BTA020722.1,novel_T012623,novel_T012624,novel_T012625,novel_T012626	65.31	64.53	68.15	69.79	54.41	31.74	46.29	51.5	-	-	ko04360//Axon guidance	-	GO:0003779//actin binding;GO:0008270//zinc ion binding;GO:0016740//transferase activity	GO:0007010//cytoskeleton organization	gi|242017898|ref|XP_002429421.1|/0/ablim, putative [Pediculus humanus corporis]
Btabaci_GLEAN_10012941	BTA028692.1	65.29	81.53	55.71	53.94	84.18	98.03	100.29	92.77	-	-	-	-	-	-	gi|817060982|ref|XP_012252074.1|/6.16426e-171/PREDICTED: protein l(2)37Cc [Athalia rosae]
Btabaci_GLEAN_10011225	BTA001148.1,novel_T000650,novel_T000651,novel_T000652,novel_T000653,novel_T000654,novel_T000655,novel_T000656,novel_T000657,novel_T000658,novel_T000659,novel_T000660,novel_T000661,novel_T000662,novel_T000663,novel_T000664	65.06	61.38	63.16	71.85	48.77	34.35	35.5	33.15	-	-	ko04810//Regulation of actin cytoskeleton;ko05200//Pathways in cancer;ko05205//Proteoglycans in cancer;ko04015//Rap1 signaling pathway;ko05100//Bacterial invasion of epithelial cells;ko04151//PI3K-Akt signaling pathway;ko04919//Thyroid hormone signaling pathway;ko04510//Focal adhesion;ko04145//Phagosome;ko05131//Shigellosis;ko05206//MicroRNAs in cancer;ko04611//Platelet activation;ko05130//Pathog…	GO:0005576//extracellular region	GO:0005509//calcium ion binding	GO:0007155//cell adhesion	gi|242015135|ref|XP_002428229.1|/0/Thrombospondin-3 precursor, putative [Pediculus humanus corporis]
CUFF102.253.1	BTA024758.8,novel_T014847	65.05	46.77	55.43	83.24	48.2	71.11	32.39	54.49	-	-	-	-	-	-	-
Btabaci_GLEAN_10006513	BTA008972.1,novel_T005669	65.03	60.8	77.84	64.96	67.86	67.48	63.71	71.06	-	-	ko01100//Metabolic pathways;ko00790//Folate biosynthesis	-	-	-	gi|939273970|ref|XP_014257300.1|/3.23991e-154/PREDICTED: iron/zinc purple acid phosphatase-like protein isoform X1 [Cimex lectularius]
Btabaci_GLEAN_10018335	BTA019080.1,novel_T011481	64.98	65.55	65.49	66.16	57.48	25.74	60.51	49.54	-	-	-	-	-	-	gi|939265416|ref|XP_014252753.1|/2.75605e-107/PREDICTED: leucine-rich repeat-containing protein 15-like [Cimex lectularius]
Btabaci_GLEAN_10008495	BTA005669.2,novel_T003702,novel_T003703	64.96	38	74.83	86.29	41.77	10.86	31.22	48.9	-	-	ko04721//Synaptic vesicle cycle	-	GO:0019905//syntaxin binding	GO:0006836//neurotransmitter transport	gi|347976443|ref|XP_001237245.3|/3.9033e-33/AGAP003509-PA [Anopheles gambiae str. PEST]
Btabaci_GLEAN_10010345	BTA002607.1,novel_T001736	64.94	50.43	76.89	76.07	54.2	62.6	57.73	66.87	-	-	-	-	-	-	gi|1004401239|gb|KYB28249.1|/3.59529e-07/Retrovirus-related Pol polyprotein from transposon 17.6-like Protein [Tribolium castaneum]
Btabaci_GLEAN_10025291	BTA020465.1,novel_T012459,novel_T012460,novel_T012461,novel_T012462,novel_T012463,novel_T012464,novel_T012465,novel_T012466	64.94	59.32	72.13	71.52	72.96	68.43	80.75	78.57	-	-	-	-	GO:0016740//transferase activity	-	gi|242022015|ref|XP_002431437.1|/0/Bromodomain and PHD finger-containing protein, putative [Pediculus humanus corporis]
Btabaci_GLEAN_10008929	BTA004933.1,novel_T003326	64.91	51.7	76.63	78.48	47.22	41.93	51.05	48.38	-	-	ko05410//Hypertrophic cardiomyopathy (HCM);ko04924//Renin secretion;ko05142//Chagas disease (American trypanosomiasis);ko04614//Renin-angiotensin system	-	-	-	gi|328723891|ref|XP_001943158.2|/0/PREDICTED: angiotensin-converting enzyme-like [Acyrthosiphon pisum]
Btabaci_GLEAN_10024458	BTA026729.1	64.89	50.53	73.66	73.04	46.93	21.33	42.4	46.92	-	-	-	-	-	-	gi|644995556|ref|XP_008208872.1|/4.54267e-13/PREDICTED: interaptin-like isoform X2 [Nasonia vitripennis]
Btabaci_GLEAN_10012276	BTA029782.1,novel_T017990	64.86	61.08	53.46	63.04	53.12	92.67	50.49	68.59	-	-	ko01100//Metabolic pathways;ko00500//Starch and sucrose metabolism;ko00052//Galactose metabolism	-	-	-	gi|193709215|ref|XP_001943317.1|/1.35297e-144/PREDICTED: maltase A1 [Acyrthosiphon pisum]
Btabaci_GLEAN_10027160	BTA009042.1,novel_T005709	64.82	57.05	68.91	75.96	42.41	22.29	41.91	42.58	-	-	ko03018//RNA degradation	-	-	-	gi|646719502|gb|KDR21597.1|/2.21059e-154/Protein Tob2 [Zootermopsis nevadensis]
Btabaci_GLEAN_10005065	BTA011599.1,novel_T007321	64.7	84.34	68.04	59.02	82.41	82.61	68.58	69.74	-	-	-	-	GO:0009055//electron carrier activity	-	gi|114053151|ref|NP_001040123.1|/6.5846e-154/electron-transfer-flavoprotein beta polypeptide [Bombyx mori]
Btabaci_GLEAN_10007881	BTA006619.1,novel_T004220,novel_T004221	64.66	45.69	69.24	66.48	41.16	43.24	47.93	65.44	-	-	ko01100//Metabolic pathways;ko04640//Hematopoietic cell lineage;ko00480//Glutathione metabolism;ko04614//Renin-angiotensin system	-	-	-	gi|817220274|ref|XP_012285769.1|/1.78531e-57/PREDICTED: aminopeptidase N-like [Orussus abietinus]
Btabaci_GLEAN_10006243	BTA009563.1,novel_T006112	64.61	65.07	67.78	61.12	58.92	55.14	56.98	64.9	-	-	ko03060//Protein export	-	-	-	gi|939279259|ref|XP_014260202.1|/0/PREDICTED: signal recognition particle receptor subunit alpha homolog [Cimex lectularius]
Btabaci_GLEAN_10026013	BTA010973.1,novel_T006939	64.45	49.03	80.98	75.46	50.71	44.2	51.03	49.55	-	-	-	-	-	-	gi|242016260|ref|XP_002428747.1|/0/Microtubule-associated protein 1A, putative [Pediculus humanus corporis]
Btabaci_GLEAN_10008781	BTA005227.1,novel_T003488	64.43	42.99	63.61	65.26	26.28	7.88	16.52	16.44	-	-	-	-	-	-	gi|952520630|gb|KRT80971.1|/1.0141e-14/hypothetical protein AMK59_6253 [Oryctes borbonicus]
Btabaci_GLEAN_10016558	BTA023018.1,novel_T014022	64.26	82.9	52.4	67.77	72.81	73.13	74.52	68.48	-	-	-	-	-	-	gi|759077141|ref|XP_011348330.1|/2.59095e-35/PREDICTED: double-stranded RNA-specific editase 1-like isoform X3 [Cerapachys biroi]
CUFF108.554.2	BTA026426.2	64.12	85.88	98.29	56.39	65.79	113.19	82.7	97	-	-	ko05146//Amoebiasis;ko05110//Vibrio cholerae infection	-	-	-	gi|939650274|ref|XP_008543446.2|/2.90239e-08/PREDICTED: serine-rich adhesin for platelets-like, partial [Microplitis demolitor]
CUFF14.302.2	BTA003412.1,novel_T002371	63.97	68.51	65.27	71.5	63.42	116.9	58.54	79.13	-	-	-	-	-	-	-
Btabaci_GLEAN_10016439	BTA023220.1,novel_T014124,novel_T014125,novel_T014126,novel_T014127	63.69	73.28	67.84	64.57	57.55	52.33	66.38	61.73	-	-	-	-	-	-	gi|530252549|gb|AGT15701.1|/0/CPR [Bemisia tabaci]
Btabaci_GLEAN_10016103	BTA023770.2,novel_T014340	63.67	49.9	94.93	79.34	46.66	59.71	43.31	45.53	-	-	ko01100//Metabolic pathways;ko00230//Purine metabolism;ko05169//Epstein-Barr virus infection;ko05016//Huntington's disease;ko00240//Pyrimidine metabolism;ko05168//Herpes simplex infection;ko03020//RNA polymerase	-	-	-	gi|91084815|ref|XP_973232.1|/1.9404e-37/PREDICTED: alpha-tocopherol transfer protein-like isoform X2 [Tribolium castaneum]
Btabaci_GLEAN_10026814	BTA026292.1	63.64	42.8	64.57	77.98	46.92	94.83	60.85	70.76	-	-	ko04810//Regulation of actin cytoskeleton;ko04144//Endocytosis;ko04666//Fc gamma R-mediated phagocytosis;ko05100//Bacterial invasion of epithelial cells;ko04062//Chemokine signaling pathway;ko05131//Shigellosis;ko05130//Pathogenic Escherichia coli infection;ko04520//Adherens junction;ko05231//Choline metabolism in cancer;ko05132//Salmonella infection	-	-	-	gi|985398277|ref|XP_015366706.1|/1.59622e-110/PREDICTED: ankyrin repeat domain-containing protein 33-like [Diuraphis noxia]
Btabaci_GLEAN_10025162	BTA021572.2,novel_T013248,novel_T013249,novel_T013250,novel_T013251	63.62	64.43	72.55	65.87	58.9	27.03	57.27	50.82	-	-	-	-	-	-	gi|817181738|ref|XP_012280250.1|/0/PREDICTED: protein PRRC2C isoform X6 [Orussus abietinus]
Btabaci_GLEAN_10024659	BTA025366.1,novel_T015188	63.59	52.45	72.94	70.72	55.75	46.66	62.26	73.44	-	-	ko04068//FoxO signaling pathway;ko05134//Legionellosis	GO:0005740//mitochondrial envelope;GO:0016021//integral component of membrane	-	GO:0043065//positive regulation of apoptotic process	gi|646717597|gb|KDR20388.1|/7.51775e-92/BCL2/adenovirus E1B 19 kDa protein-interacting protein 3-like [Zootermopsis nevadensis]
Btabaci_GLEAN_10006948	BTA008247.1,novel_T005349,novel_T005350	63.52	68.81	56.96	50.78	82.71	63.28	72.28	76.78	-	-	ko05168//Herpes simplex infection;ko03040//Spliceosome	-	-	-	gi|662213161|ref|XP_008480354.1|/1.0859e-75/PREDICTED: RNA-binding protein Rsf1 isoform X2 [Diaphorina citri]
Btabaci_GLEAN_10022617	BTA005196.1,novel_T003472,novel_T003473	63.48	53.24	74.07	67.95	67.07	71.19	60.73	64.41	-	-	-	-	-	-	gi|339896265|gb|AEK21818.1|/4.0856e-122/cytochrome P450 [Bemisia tabaci]
Btabaci_GLEAN_10017661	BTA020850.1,novel_T012701,novel_T012702	63.45	95.6	54.18	52.29	77.92	48.99	81.84	66.31	-	-	ko01100//Metabolic pathways;ko01200//Carbon metabolism;ko00620//Pyruvate metabolism;ko00270//Cysteine and methionine metabolism;ko00630//Glyoxylate and dicarboxylate metabolism;ko00020//Citrate cycle (TCA cycle);ko04964//Proximal tubule bicarbonate reclamation	-	GO:0030060//L-malate dehydrogenase activity	GO:0005975//carbohydrate metabolic process;GO:0006099//tricarboxylic acid cycle;GO:0006108//malate metabolic process	gi|242008014|ref|XP_002424808.1|/0/malate dehydrogenase, putative [Pediculus humanus corporis]
Btabaci_GLEAN_10019480	BTA016511.1	63.24	64.21	42.42	67.21	77.24	69.7	49.74	65.09	-	-	ko04120//Ubiquitin mediated proteolysis	-	GO:0005524//ATP binding;GO:0016874//ligase activity	-	gi|646719716|gb|KDR21734.1|/1.10052e-126/NEDD8-conjugating enzyme Ubc12 [Zootermopsis nevadensis]
Btabaci_GLEAN_10025493	BTA018485.1,novel_T011207	63.12	59.26	74.23	73.86	52.67	41.6	50.48	48.09	-	-	-	-	-	-	gi|478255325|gb|ENN75551.1|/2.04111e-23/hypothetical protein YQE_07894, partial [Dendroctonus ponderosae]
Btabaci_GLEAN_10015031	BTA025663.1,novel_T015343,novel_T015344	63.07	55.62	67.18	64.42	60.92	64.07	55.89	61.96	-	-	-	-	-	-	gi|909575886|ref|XP_013143690.1|/6.49598e-103/PREDICTED: putative RNA-binding protein Luc7-like 2, partial [Papilio polytes]
Btabaci_GLEAN_10012535	BTA029411.1	63.05	48.47	47.38	72.66	61.8	71	53.28	72.18	-	-	ko05130//Pathogenic Escherichia coli infection	-	-	-	gi|768411808|ref|XP_011565759.1|/1.1714e-10/PREDICTED: neurofilament heavy polypeptide-like [Plutella xylostella]
Btabaci_GLEAN_10026508	BTA001239.1,novel_T000725,novel_T000726	63.04	56.18	60.06	66.24	62.39	67.75	60.84	80.27	-	-	-	-	-	-	-
Btabaci_GLEAN_10020641	BTA012662.1,novel_T007888	63.01	115.66	55.65	60.18	165.02	142.12	119.45	139.11	-	-	ko03010//Ribosome	GO:0005840//ribosome	GO:0003735//structural constituent of ribosome;GO:0019843//rRNA binding	GO:0006412//translation	gi|914100868|ref|NP_001298608.1|/4.19996e-95/40S ribosomal protein S18 [Papilio polytes]
Btabaci_GLEAN_10020276	BTA013903.1,novel_T008785,novel_T008786,novel_T008787	62.96	45.11	59.28	55.31	48.89	42.07	38.91	40.26	-	-	ko01100//Metabolic pathways;ko04146//Peroxisome;ko01212//Fatty acid metabolism;ko00071//Fatty acid degradation;ko00061//Fatty acid biosynthesis;ko03320//PPAR signaling pathway;ko04920//Adipocytokine signaling pathway	-	-	-	gi|963328783|gb|ALT07198.1|/0/long chain acyl-CoA synthetase isoform 1 [Rhodnius prolixus]
Btabaci_GLEAN_10017843	BTA020434.1,novel_T012432,novel_T012433	62.94	83.94	53.85	50.95	79.05	74.97	94.12	83.24	-	-	-	-	-	-	gi|339896255|gb|AEK21813.1|/0/cytochrome P450 [Bemisia tabaci]
Btabaci_GLEAN_10022914	BTA003931.1,novel_T002758,novel_T002759,novel_T002760,novel_T002761,novel_T002762	62.93	55.24	66.49	69.63	53.67	51.04	52.46	53.25	-	-	ko04910//Insulin signaling pathway;ko04520//Adherens junction;ko03320//PPAR signaling pathway	-	-	-	gi|820862337|ref|XP_012347906.1|/2.84816e-161/PREDICTED: sorbin and SH3 domain-containing protein 1 isoform X29 [Apis florea]
Btabaci_GLEAN_10020216	BTA014059.1,novel_T008873	62.93	60.6	61.57	56.65	58.98	66.13	48.23	52.2	-	-	-	-	GO:0008486//diphosphoinositol-polyphosphate diphosphatase activity;GO:0052840//inositol diphosphate tetrakisphosphate diphosphatase activity;GO:0052843//inositol-1-diphosphate-2,3,4,5,6-pentakisphosphate diphosphatase activity;GO:0052844//inositol-3-diphosphate-1,2,4,5,6-pentakisphosphate diphosphatase activity;GO:0052845//inositol-5-diphosphate-1,2,3,4,6-pentakisphosphate diphosphatase activity;…	-	gi|939257119|ref|XP_014248370.1|/7.39903e-86/PREDICTED: diphosphoinositol polyphosphate phosphohydrolase 1-like [Cimex lectularius]
Btabaci_GLEAN_10014233	BTA026910.1,novel_T016138,novel_T016139,novel_T016140,novel_T016141,novel_T016142,novel_T016143,novel_T016144,novel_T016145,novel_T016146,novel_T016147,novel_T016148,novel_T016149,novel_T016150,novel_T016151,novel_T016152,novel_T016153,novel_T016154	62.9	50.28	74.16	65.24	47.36	43.18	51.06	51.27	-	-	ko04530//Tight junction;ko04931//Insulin resistance;ko04270//Vascular smooth muscle contraction;ko04750//Inflammatory mediator regulation of TRP channels;ko05162//Measles;ko04660//T cell receptor signaling pathway;ko04064//NF-kappa B signaling pathway;ko04920//Adipocytokine signaling pathway	-	-	-	gi|985417455|ref|XP_015374183.1|/1.86235e-73/PREDICTED: SH3 and cysteine-rich domain-containing protein 2-like isoform X9 [Diuraphis noxia]
Btabaci_GLEAN_10019979	BTA014721.1,novel_T009263,novel_T009264	62.9	100.69	53.04	50.21	72.45	40.09	68.51	43.6	-	-	-	-	-	-	gi|1000737826|ref|XP_015591446.1|/0/PREDICTED: xaa-Pro aminopeptidase 1-like [Cephus cinctus]
Btabaci_GLEAN_10013903	BTA027321.1,novel_T016402,novel_T016403	62.86	52.71	72.58	66.56	51.24	79.59	54.52	72.38	-	-	-	-	-	-	gi|646721128|gb|KDR22598.1|/1.13001e-76/Protein big brother [Zootermopsis nevadensis]
Btabaci_GLEAN_10020380	BTA013481.1,novel_T008520,novel_T008521	62.83	182.73	31.03	71.03	159.54	236.41	59.51	394.25	-	-	ko04142//Lysosome;ko00100//Steroid biosynthesis	-	-	-	gi|939654280|ref|XP_014275807.1|/2.13415e-77/PREDICTED: lipase 1-like [Halyomorpha halys]
Btabaci_GLEAN_10004264	BTA013141.1	62.83	39.16	78.62	75.44	38.7	28.3	40.89	47.44	-	-	ko04514//Cell adhesion molecules (CAMs);ko04512//ECM-receptor interaction;ko05416//Viral myocarditis;ko05020//Prion diseases	-	-	-	gi|939660408|ref|XP_014278124.1|/1.04477e-180/PREDICTED: pikachurin [Halyomorpha halys]
Btabaci_GLEAN_10003121	BTA015554.1	62.79	41.42	76.15	72.65	41.15	28.12	36.55	46.13	-	-	-	-	-	-	gi|662188057|ref|XP_008487685.1|/1.20647e-83/PREDICTED: leucine-rich repeat neuronal protein 1-like [Diaphorina citri]
Btabaci_GLEAN_10013068	BTA028524.1,novel_T017029	62.76	50.4	75.08	67.7	40.38	23.55	38.37	32.15	-	-	ko01100//Metabolic pathways;ko00650//Butanoate metabolism;ko00072//Synthesis and degradation of ketone bodies	-	-	-	gi|662189239|ref|XP_008467337.1|/2.74654e-38/PREDICTED: uncharacterized protein LOC103504817 [Diaphorina citri]
Btabaci_GLEAN_10018134	BTA019710.1	62.71	88.43	32.35	36.3	35.52	22.26	25.5	28.32	-	-	-	-	-	-	gi|295881646|gb|ADG56568.1|/2.08575e-88/chemosensory protein [Bemisia tabaci]
Btabaci_GLEAN_10026345	BTA005137.1,novel_T003418,novel_T003420	62.45	70.71	56.41	57.47	66.32	41.72	62.73	63.38	-	-	-	-	-	-	gi|998520196|ref|XP_015521064.1|/0/PREDICTED: far upstream element-binding protein 3 isoform X1 [Neodiprion lecontei]
Btabaci_GLEAN_10013882	BTA027358.1	62.38	45.13	86.36	62.21	41.42	30.33	40.59	48.18	-	-	ko04727//GABAergic synapse	-	-	-	gi|665808436|ref|XP_008552539.1|/9.23293e-20/PREDICTED: sodium- and chloride-dependent GABA transporter ine [Microplitis demolitor]
Btabaci_GLEAN_10018190	BTA019553.1,novel_T011827	62.16	61.08	61.8	66.98	70.55	51.41	69.08	75.25	-	-	ko04070//Phosphatidylinositol signaling system	GO:0016021//integral component of membrane	GO:0034597//phosphatidylinositol-4,5-bisphosphate 4-phosphatase activity	GO:0046856//phosphatidylinositol dephosphorylation	gi|646708747|gb|KDR14912.1|/1.01504e-110/hypothetical protein L798_11218 [Zootermopsis nevadensis]
Btabaci_GLEAN_10018052	BTA019966.1,novel_T012072	62.16	61.1	78.3	79.65	52.89	38.74	46.05	48.88	-	-	-	-	-	-	gi|939280125|ref|XP_014260658.1|/1.65095e-84/PREDICTED: calcium channel flower [Cimex lectularius]
Btabaci_GLEAN_10026233	BTA007664.2,novel_T004907,novel_T004908,novel_T004909,novel_T004910,novel_T004911,novel_T004912	62.02	73.4	52.18	52.8	73.89	73.33	79.56	71.43	-	-	-	-	-	-	gi|641654347|ref|XP_008179169.1|/0/PREDICTED: probable ATP-dependent RNA helicase DHX34 [Acyrthosiphon pisum]
Btabaci_GLEAN_10025329	BTA020207.1,novel_T012267,novel_T012268,novel_T012269,novel_T012270,novel_T012271,novel_T012272,novel_T012273,novel_T012274	61.93	47.72	71.09	71.43	64.1	55.17	58.12	70.43	-	-	-	-	-	-	gi|662190734|ref|XP_008468146.1|/0/PREDICTED: echinoderm microtubule-associated protein-like 2 isoform X3 [Diaphorina citri]
Btabaci_GLEAN_10009541	BTA003960.1,novel_T002788	61.74	62.79	65.97	58.91	70.26	51.58	69.24	69.08	-	-	ko05016//Huntington's disease	-	-	-	gi|641651884|ref|XP_008178166.1|/1.8526e-83/PREDICTED: serine proteinase stubble-like [Acyrthosiphon pisum]
Btabaci_GLEAN_10009169	BTA004576.1	61.72	72.25	50.03	61.71	81.39	66.07	81.06	67.01	-	-	ko05014//Amyotrophic lateral sclerosis (ALS)	-	-	-	gi|998498643|ref|XP_015509167.1|/6.27684e-87/PREDICTED: 28 kDa heat- and acid-stable phosphoprotein-like [Neodiprion lecontei]
Btabaci_GLEAN_10021715	BTA008552.1,novel_T005498,novel_T005499	61.72	51.8	35.88	42.07	50.99	17.38	33.57	45.18	-	-	-	-	-	-	gi|939696810|ref|XP_014292547.1|/0/PREDICTED: muscle LIM protein Mlp84B-like isoform X2 [Halyomorpha halys]
Btabaci_GLEAN_10020140	BTA014330.1,novel_T009059,novel_T009060	61.67	54.41	65.23	59.63	55.62	64.19	46.62	59.42	-	-	ko05200//Pathways in cancer;ko05204//Chemical carcinogenesis;ko04066//HIF-1 signaling pathway;ko05211//Renal cell carcinoma	GO:0016020//membrane;GO:0044424	GO:0005488	GO:0006351//transcription, DNA-templated	gi|242021051|ref|XP_002430960.1|/0/conserved hypothetical protein [Pediculus humanus corporis]
Btabaci_GLEAN_10021200	BTA010669.1,novel_T006764,novel_T006765	61.66	62.01	73.27	64.44	52.74	43.95	58.19	54.92	-	-	ko05164//Influenza A	-	-	-	gi|939671042|ref|XP_014282216.1|/0/PREDICTED: heterogeneous nuclear ribonucleoprotein U-like protein 1 isoform X2 [Halyomorpha halys]
Btabaci_GLEAN_10014382	BTA026679.1,novel_T015945,novel_T015946,novel_T015947,novel_T015948,novel_T015949,novel_T015950	61.65	46.74	62.06	57.27	53.83	51.74	50.18	58.95	-	-	ko03040//Spliceosome	-	-	-	gi|939269754|ref|XP_014255068.1|/0/PREDICTED: poly(U)-binding-splicing factor half pint isoform X4 [Cimex lectularius]
Btabaci_GLEAN_10021065	BTA011171.1,novel_T007026	61.6	63.63	62.38	68.57	69.17	48.95	71.32	74.59	-	-	ko04070//Phosphatidylinositol signaling system	GO:0016021//integral component of membrane	GO:0034597//phosphatidylinositol-4,5-bisphosphate 4-phosphatase activity	GO:0046856//phosphatidylinositol dephosphorylation	gi|646708747|gb|KDR14912.1|/1.01504e-110/hypothetical protein L798_11218 [Zootermopsis nevadensis]
Btabaci_GLEAN_10021543	BTA009325.1,novel_T005953,novel_T005954	61.6	72.74	64.57	62.15	65.71	41.97	66.23	62.37	-	-	ko03013//RNA transport;ko05416//Viral myocarditis	-	-	-	gi|1000731783|ref|XP_015588282.1|/0/PREDICTED: eukaryotic translation initiation factor 4 gamma 2 isoform X1 [Cephus cinctus]
Btabaci_GLEAN_10024460	BTA026577.1	61.53	30.1	39.58	27.21	34.71	68.36	27.69	36.41	-	-	-	-	-	-	gi|675370319|gb|KFM63221.1|/4.15238e-06/hypothetical protein X975_20362, partial [Stegodyphus mimosarum]
Btabaci_GLEAN_10022705	BTA004663.2,novel_T003187	61.51	45.11	71.64	75.42	54.07	83.45	47.61	68.41	-	-	-	-	-	-	gi|766917768|ref|XP_011494655.1|/5.34369e-73/PREDICTED: peptidyl-prolyl cis-trans isomerase B-like [Ceratosolen solmsi marchali]
Btabaci_GLEAN_10017448	BTA021295.2,novel_T013021	61.51	45.11	71.64	75.42	54.07	83.45	47.61	68.41	-	-	-	-	-	-	gi|766917768|ref|XP_011494655.1|/5.34369e-73/PREDICTED: peptidyl-prolyl cis-trans isomerase B-like [Ceratosolen solmsi marchali]
Btabaci_GLEAN_10019772	BTA015537.4,novel_T009768,novel_T009769,novel_T009770,novel_T009771,novel_T009772,novel_T009773,novel_T009774,novel_T009775,novel_T009776,novel_T009777,novel_T009778,novel_T009779,novel_T009780,novel_T009781,novel_T009782,novel_T009783,novel_T009784	61.44	67.04	63.69	59.9	67.58	54.62	64.68	67.66	-	-	-	-	-	-	gi|157117142|ref|XP_001652955.1|/0/AAEL007889-PA [Aedes aegypti]
Btabaci_GLEAN_10016754	BTA022643.1,novel_T013830	61.43	57.6	45.07	45.01	59	37.9	57.48	48.57	-	-	-	-	-	-	gi|641658425|ref|XP_001946942.3|/0/PREDICTED: formin-like protein 14 [Acyrthosiphon pisum]
Btabaci_GLEAN_10017431	BTA021367.2,novel_T013074,novel_T013075	61.29	58.04	71.2	67.22	53.35	26.76	52.68	43.9	-	-	-	-	GO:0003824//catalytic activity	-	gi|242008012|ref|XP_002424807.1|/0/hect E3 ubiquitin ligase, putative [Pediculus humanus corporis]
Btabaci_GLEAN_10014716	BTA026190.1	61.29	34.08	46.57	73.58	51.35	53.48	53.04	75.95	-	-	ko03008//Ribosome biogenesis in eukaryotes	-	-	-	gi|662183551|ref|XP_008488096.1|/0/PREDICTED: guanine nucleotide-binding protein-like 1 isoform X1 [Diaphorina citri]
Btabaci_GLEAN_10006441	BTA009212.1	61.21	48.78	48.22	66.51	54.5	74.27	57.3	65.25	-	-	-	-	-	-	gi|951555421|ref|XP_014477239.1|/1.4003e-38/PREDICTED: facilitated trehalose transporter Tret1-like [Dinoponera quadriceps]
Btabaci_GLEAN_10026602	BTA000097.2,novel_T000150,novel_T000151,novel_T000152,novel_T000153	61.09	59.97	62.2	61.39	57.65	64.63	55.05	57.67	-	-	-	-	-	-	gi|815816657|ref|XP_012229429.1|/4.62352e-93/PREDICTED: cytochrome b561-like isoform X2 [Linepithema humile]
Btabaci_GLEAN_10015803	BTA024334.1,novel_T014565	61	110.13	45.31	55.82	82.73	105.82	94.92	87.4	-	-	ko04141//Protein processing in endoplasmic reticulum	-	-	-	gi|646722800|gb|KDR23667.1|/1.30813e-94/Translocon-associated protein subunit gamma [Zootermopsis nevadensis]
Btabaci_GLEAN_10005144	BTA011469.1,novel_T007255,novel_T007256	60.99	55.8	77.79	70.58	43.82	25.89	38.81	37.22	-	-	ko05034//Alcoholism;ko05322//Systemic lupus erythematosus	-	-	-	gi|662190061|ref|XP_008467777.1|/4.38351e-142/PREDICTED: transcriptional activator protein Pur-beta isoform X2 [Diaphorina citri]
Btabaci_GLEAN_10023095	BTA003161.2,novel_T002155,novel_T002156,novel_T002157,novel_T002158,novel_T002159,novel_T002160,novel_T002161	60.76	53.38	62.13	50.83	44.29	28.48	40.68	38.69	-	-	-	-	-	-	gi|939276863|ref|XP_014258925.1|/3.89711e-108/PREDICTED: RNA binding protein fox-1 homolog 2 isoform X3 [Cimex lectularius]
Btabaci_GLEAN_10020415	BTA013394.1,novel_T008445	60.76	57.48	54.96	65.23	59.73	75.78	51.74	62.36	-	-	ko05014//Amyotrophic lateral sclerosis (ALS)	-	-	-	gi|768411808|ref|XP_011565759.1|/2.1251e-11/PREDICTED: neurofilament heavy polypeptide-like [Plutella xylostella]
CUFF41.186.1	BTA009554.1,novel_T006078,novel_T006079,novel_T006080,novel_T006081,novel_T006082,novel_T006083,novel_T006084,novel_T006085,novel_T006086,novel_T006087,novel_T006088,novel_T006089	60.73	65.56	49.97	47.26	65.41	30.06	65.77	45.59	-	-	ko00230//Purine metabolism;ko05169//Epstein-Barr virus infection;ko00240//Pyrimidine metabolism;ko03020//RNA polymerase;ko04623//Cytosolic DNA-sensing pathway	-	-	-	gi|954556748|ref|XP_014601995.1|/0/PREDICTED: titin-like [Polistes canadensis]
Btabaci_GLEAN_10017974	BTA020148.1,novel_T012218,novel_T012219,novel_T012220,novel_T012221	60.66	46.69	73.78	76.57	48.17	52.44	44.68	46.11	-	-	ko01100//Metabolic pathways;ko00564//Glycerophospholipid metabolism;ko04070//Phosphatidylinositol signaling system	-	-	-	gi|646701498|gb|KDR11188.1|/0/Phosphatidate cytidylyltransferase, photoreceptor-specific [Zootermopsis nevadensis]
CUFF66.452.2	BTA015656.2,novel_T009842	60.63	62.58	63.51	55.76	64.86	74.86	65.68	67.93	-	-	-	-	-	-	gi|646715732|gb|KDR19236.1|/0/ATP-dependent metalloprotease YME1L1 [Zootermopsis nevadensis]
CUFF69.88.2	BTA016060.1,novel_T010090,novel_T010091,novel_T010092	60.61	56.68	53.17	52.11	67.15	71.61	68.42	77.77	-	-	-	-	-	-	gi|939272945|ref|XP_014256783.1|/6.81401e-79/PREDICTED: alpha-tocopherol transfer protein-like [Cimex lectularius]
Btabaci_GLEAN_10024225	BTA028513.3,novel_T017006,novel_T017007,novel_T017008,novel_T017009,novel_T017010	60.54	185.53	32.86	41.84	176.32	69.51	248.25	155.16	-	-	-	-	-	-	gi|1004401395|gb|KYB28351.1|/3.40459e-126/Protein LSM14 homolog B-like Protein [Tribolium castaneum]
CUFF84.205.1	BTA020212.1,novel_T012279,novel_T012280	60.52	59.1	66.12	56.52	75.71	67.29	72.32	74.49	-	-	ko01100//Metabolic pathways;ko00360//Phenylalanine metabolism;ko00130//Ubiquinone and other terpenoid-quinone biosynthesis	-	-	-	gi|328708058|ref|XP_003243588.1|/2.44175e-170/PREDICTED: 4-coumarate--CoA ligase-like [Acyrthosiphon pisum]
Btabaci_GLEAN_10016831	BTA022392.1	60.5	68.57	65.18	52	55.37	35.64	60.4	57.83	-	-	ko03013//RNA transport;ko03015//mRNA surveillance pathway;ko03040//Spliceosome	-	-	-	gi|906459344|gb|KNC22357.1|/1.95534e-111/hypothetical protein FF38_02936 [Lucilia cuprina]
Btabaci_GLEAN_10014569	BTA026442.1,novel_T015834,novel_T015835,novel_T015836	60.43	58.91	73.84	76	53.4	47.65	46.55	47.01	-	-	-	-	-	-	gi|646698260|gb|KDR09530.1|/0/Myotubularin-related protein 13 [Zootermopsis nevadensis]
Btabaci_GLEAN_10025946	BTA012170.1,novel_T007624	60.32	27.8	90.29	78.41	12.4	3.72	2.98	2.98	-	-	-	-	-	-	gi|939272673|ref|XP_014256639.1|/0/PREDICTED: uncharacterized protein LOC106670636 isoform X2 [Cimex lectularius]
Btabaci_GLEAN_10012533	BTA029428.1	60.29	83.37	58.92	56.2	69.87	84.17	60.89	67.56	-	-	-	GO:0005739//mitochondrion	GO:0003746//translation elongation factor activity;GO:0003924//GTPase activity;GO:0005525//GTP binding	GO:0070125//mitochondrial translational elongation	gi|939690081|ref|XP_014289001.1|/3.74759e-156/PREDICTED: elongation factor Tu [Halyomorpha halys]
Btabaci_GLEAN_10001059	BTA021189.1,novel_T012959,novel_T012960,novel_T012961	60.17	57	70.04	70.14	55.38	12.44	47.53	41.81	-	-	ko00230//Purine metabolism;ko04024//cAMP signaling pathway;ko05032//Morphine addiction	-	-	-	gi|1000756592|ref|XP_015601239.1|/1.12406e-159/PREDICTED: cAMP-specific 3',5'-cyclic phosphodiesterase, isoform F isoform X11 [Cephus cinctus]
Btabaci_GLEAN_10009816	BTA003508.1,novel_T002419,novel_T002420,novel_T002421,novel_T002422,novel_T002423,novel_T002424,novel_T002425,novel_T002426	60.12	54.86	64.3	63.88	54.14	40.29	60.85	50.91	-	-	-	-	-	-	gi|646709938|gb|KDR15593.1|/0/MAP/microtubule affinity-regulating kinase 3, partial [Zootermopsis nevadensis]
CUFF11.309.3	BTA002562.1,novel_T001716	60.11	68.49	65.81	49.85	72.07	99.02	85.6	86.55	-	-	ko03010//Ribosome	-	-	-	gi|951536041|ref|XP_014471484.1|/1.9051e-42/PREDICTED: 39S ribosomal protein L35, mitochondrial [Dinoponera quadriceps]
Btabaci_GLEAN_10021205	BTA010594.1	60.05	59.33	66.64	61.3	54.96	38.91	50.98	56.62	-	-	ko04144//Endocytosis	-	-	-	gi|1000763361|ref|XP_015604757.1|/2.29152e-112/PREDICTED: sorting nexin-12 [Cephus cinctus]
Btabaci_GLEAN_10021335	BTA010218.1,novel_T006440	60.01	47.35	54.97	66.82	57.34	87.71	59.74	68.65	-	-	ko04080//Neuroactive ligand-receptor interaction;ko04974//Protein digestion and absorption;ko05164//Influenza A;ko04972//Pancreatic secretion	-	-	-	gi|1000752924|ref|XP_015599347.1|/4.87405e-74/PREDICTED: trypsin [Cephus cinctus]
Btabaci_GLEAN_10023058	BTA003413.1	59.96	48.08	36.65	41.9	25.83	121.36	43.85	69.77	-	-	-	-	-	-	-
Btabaci_GLEAN_10003619	BTA014465.1,novel_T009133,novel_T009134	59.96	55.52	60.54	65.87	57.99	33.44	54.34	51.47	-	-	ko04115//p53 signaling pathway	-	-	-	gi|939672447|ref|XP_014282716.1|/0/PREDICTED: sestrin homolog isoform X2 [Halyomorpha halys]
Btabaci_GLEAN_10014845	BTA025975.1,novel_T015492	59.9	76.83	60.91	55.28	72.31	52.3	69.42	64.17	-	-	-	GO:0005737//cytoplasm	GO:0005524//ATP binding;GO:0051082//unfolded protein binding	GO:0006457//protein folding	gi|242017287|ref|XP_002429123.1|/5.1327e-122/Hsp60 protein, putative [Pediculus humanus corporis]
Btabaci_GLEAN_10015487	BTA024958.2,novel_T014998	59.86	57.38	52.83	65.52	66.22	76.92	78.63	82.6	-	-	ko04915//Estrogen signaling pathway	-	-	-	gi|646715486|gb|KDR19080.1|/2.06768e-157/FK506-binding protein 4 [Zootermopsis nevadensis]
CUFF100.445.1	BTA024445.1,novel_T014609	59.86	49.63	69.84	66.26	46.4	53.59	42.81	55.31	-	-	ko04931//Insulin resistance;ko00514//Other types of O-glycan biosynthesis	-	-	-	gi|939664360|ref|XP_014279678.1|/0/PREDICTED: transmembrane and TPR repeat-containing protein 2-like [Halyomorpha halys]
Btabaci_GLEAN_10011352	BTA000946.1,novel_T000558,novel_T000559,novel_T000560,novel_T000561	59.81	64.22	68.69	66.14	59.3	42.41	57.34	54.39	-	-	ko05016//Huntington's disease;ko04142//Lysosome;ko04144//Endocytosis;ko05100//Bacterial invasion of epithelial cells;ko04721//Synaptic vesicle cycle;ko04961//Endocrine and other factor-regulated calcium reabsorption	GO:0030130//clathrin coat of trans-Golgi network vesicle;GO:0030132//clathrin coat of coated pit	GO:0005198//structural molecule activity	GO:0006886//intracellular protein transport;GO:0016192//vesicle-mediated transport	gi|646720852|gb|KDR22435.1|/0/Clathrin heavy chain [Zootermopsis nevadensis]
Btabaci_GLEAN_10014747	BTA026120.1,novel_T015596	59.73	92.74	51.55	61.83	89.01	50.07	100.06	74.77	-	-	ko05130//Pathogenic Escherichia coli infection	-	-	-	gi|910321564|ref|XP_013163734.1|/2.59149e-12/PREDICTED: protein gar2-like [Papilio xuthus]
Btabaci_GLEAN_10010076	BTA003050.1,novel_T002054	59.68	98.66	61.37	66.87	95.5	75.79	113.89	100.14	-	-	ko05130//Pathogenic Escherichia coli infection	-	-	-	gi|350539435|ref|NP_001232947.1|/2.87505e-53/uncharacterized protein LOC100168217 [Acyrthosiphon pisum]
Btabaci_GLEAN_10014206	BTA026933.1,novel_T016163,novel_T016164,novel_T016165,novel_T016166,novel_T016167,novel_T016168,novel_T016169,novel_T016170,novel_T016171,novel_T016172,novel_T016173,novel_T016174	59.65	70.64	42.67	37.32	54.75	18.74	52.9	31.93	-	-	-	-	-	-	gi|646723943|gb|KDR24377.1|/0/Muscle M-line assembly protein unc-89 [Zootermopsis nevadensis]
Btabaci_GLEAN_10026055	BTA010353.1,novel_T006510,novel_T006511,novel_T006512	59.6	41.83	70.16	65.69	41.18	20.83	33.61	38.5	-	-	-	-	-	GO:0007165//signal transduction	gi|646705564|gb|KDR13220.1|/0/Regulator of G-protein signaling 9 [Zootermopsis nevadensis]
Btabaci_GLEAN_10016209	BTA023515.1	59.34	918.08	4.78	42.8	502.29	480.25	1486.77	766.19	-	-	ko05146//Amoebiasis;ko05110//Vibrio cholerae infection	-	-	-	gi|572268951|ref|XP_006612507.1|/3.16587e-24/PREDICTED: vegetative cell wall protein gp1-like [Apis dorsata]
Btabaci_GLEAN_10022794	BTA004387.1,novel_T003006	59.3	57.49	73.93	66.96	70.55	86.6	57.05	64.61	-	-	ko04978//Mineral absorption	-	-	-	gi|805782827|ref|XP_012139671.1|/0/PREDICTED: chloride channel protein 2 isoform X2 [Megachile rotundata]
Btabaci_GLEAN_10022852	BTA004236.1,novel_T002940,novel_T002941,novel_T002942	59.25	52.34	65.14	61.92	50.08	35.9	57.18	45.99	-	-	-	-	-	-	gi|1008427454|ref|XP_008200629.2|/0/PREDICTED: probable JmjC domain-containing histone demethylation protein 2C isoform X3 [Tribolium castaneum]
Btabaci_GLEAN_10005073	BTA011566.2,novel_T007305,novel_T007306,novel_T007307,novel_T007308	59.2	92.33	42.07	39.51	77.21	108.55	113.76	114.27	-	-	ko03010//Ribosome	-	-	-	gi|506965596|gb|AGM32150.1|/2.48276e-130/ribosomal protein L10Ae [Coptotermes formosanus]
Btabaci_GLEAN_10026816	BTA026295.2,novel_T015711,novel_T015712,novel_T015713,novel_T015714,novel_T015715,novel_T015716,novel_T015717,novel_T015718,novel_T015719	59.2	81.66	45.42	46.9	73.17	73.22	74.44	68.58	-	-	-	-	-	-	gi|388523591|gb|AFK49794.1|/0/actin, partial [Cryptocercus punctulatus]
Btabaci_GLEAN_10019989	BTA014730.1,novel_T009274,novel_T009275,novel_T009276	59.17	94.16	46.68	47.39	98.39	138.45	125.99	172.45	-	-	ko03010//Ribosome	GO:0005840//ribosome	GO:0003735//structural constituent of ribosome	GO:0006412//translation	gi|240849397|ref|NP_001155817.1|/2.78347e-75/40S ribosomal protein S16-like [Acyrthosiphon pisum]
CUFF1.275.1	BTA000112.1,novel_T000164	59.15	43.43	62.93	66.23	42.1	36.51	37.46	36.61	-	-	-	-	-	-	gi|1004172519|gb|EFA12414.2|/7.19107e-124/hypothetical protein TcasGA2_TC006847, partial [Tribolium castaneum]
Btabaci_GLEAN_10010080	BTA003036.1	58.98	64.09	44.42	37.64	60.7	62.39	58.24	74.44	-	-	ko03010//Ribosome	GO:0005840//ribosome	-	-	gi|642921432|ref|XP_008192863.1|/3.41799e-75/PREDICTED: 39S ribosomal protein L22, mitochondrial [Tribolium castaneum]
Btabaci_GLEAN_10024811	BTA024439.1,novel_T014605	58.83	53.34	66.71	67.12	66.92	51.03	59.76	61.7	-	-	ko05146//Amoebiasis;ko04810//Regulation of actin cytoskeleton;ko05205//Proteoglycans in cancer;ko04015//Rap1 signaling pathway;ko04151//PI3K-Akt signaling pathway;ko04510//Focal adhesion;ko04145//Phagosome;ko04514//Cell adhesion molecules (CAMs);ko05166//HTLV-I infection;ko05414//Dilated cardiomyopathy;ko04670//Leukocyte transendothelial migration;ko05410//Hypertrophic cardiomyopathy (HCM);ko0439…	-	-	-	gi|939650300|ref|XP_014274382.1|/5.4617e-97/PREDICTED: transforming growth factor-beta-induced protein ig-h3 [Halyomorpha halys]
Btabaci_GLEAN_10015788	BTA024351.1,novel_T014573,novel_T014574	58.79	36.54	70.7	58.49	44.96	55.14	38.31	59.03	-	-	-	-	-	-	gi|972193966|ref|XP_015178798.1|/0/PREDICTED: proton-associated sugar transporter A [Polistes dominula]
Btabaci_GLEAN_10022833	BTA004313.1,novel_T002976,novel_T002977,novel_T002978,novel_T002979,novel_T002980,novel_T002981,novel_T002982	58.77	58.96	81.43	59.83	49.81	42.03	51.96	57.67	-	-	-	-	-	-	gi|645000017|ref|XP_008215809.1|/7.41394e-159/PREDICTED: luc7-like protein 3 [Nasonia vitripennis]
Btabaci_GLEAN_10004664	BTA012406.1,novel_T007765,novel_T007766	58.67	84.48	59.46	59.17	81.64	67.15	81.77	71.02	-	-	ko04141//Protein processing in endoplasmic reticulum;ko05134//Legionellosis	-	GO:0005524//ATP binding;GO:0016787//hydrolase activity	-	gi|646697098|gb|KDR08983.1|/0/Transitional endoplasmic reticulum ATPase TER94 [Zootermopsis nevadensis]
Btabaci_GLEAN_10011983	BTA030167.1	58.55	99.39	43.71	63.67	110.22	33.7	109.65	73.2	-	-	-	-	-	-	gi|939654098|ref|XP_014275732.1|/1.76969e-65/PREDICTED: CCHC-type zinc finger protein CG3800 [Halyomorpha halys]
Btabaci_GLEAN_10025281	BTA020767.1,novel_T012663	58.53	44.32	75.5	59.47	47.78	31.76	52.78	54.39	-	-	ko04146//Peroxisome	-	-	-	gi|939237853|ref|XP_014261584.1|/0/PREDICTED: putative fatty acyl-CoA reductase CG5065 [Cimex lectularius]
Btabaci_GLEAN_10006367	BTA009348.1,novel_T005959,novel_T005960,novel_T005961	58.53	51.66	50.35	57.88	57.76	78.13	52.08	63.64	-	-	-	-	GO:0003723//RNA binding	GO:0006412//translation	gi|913324698|ref|XP_013193680.1|/0/PREDICTED: translation initiation factor IF-2, mitochondrial isoform X1 [Amyelois transitella]
Btabaci_GLEAN_10020954	BTA011516.1	58.53	53.88	39.12	35.21	66.46	94.42	82.72	79.02	-	-	ko03010//Ribosome	GO:0005840//ribosome	GO:0003735//structural constituent of ribosome	GO:0006412//translation	gi|121543815|gb|ABM55572.1|/5.29617e-115/putative ribosomal protein L11 [Maconellicoccus hirsutus]
Btabaci_GLEAN_10017105	BTA021994.1,novel_T013466,novel_T013467,novel_T013469	58.5	45.58	80.07	69.66	44.38	56.45	41.47	52.71	-	-	ko00230//Purine metabolism;ko05032//Morphine addiction	-	GO:0004114//3',5'-cyclic-nucleotide phosphodiesterase activity;GO:0046872//metal ion binding	GO:0007165//signal transduction	gi|939677140|ref|XP_014284367.1|/0/PREDICTED: dual 3',5'-cyclic-AMP and -GMP phosphodiesterase 11A-like [Halyomorpha halys]
Btabaci_GLEAN_10009145	BTA004630.1,novel_T003151,novel_T003152,novel_T003153,novel_T003154,novel_T003155,novel_T003156,novel_T003157,novel_T003158,novel_T003159	58.41	47.77	73.86	71.59	57.59	36.26	49.01	49.03	-	-	ko04810//Regulation of actin cytoskeleton;ko05205//Proteoglycans in cancer;ko04015//Rap1 signaling pathway;ko04062//Chemokine signaling pathway;ko04024//cAMP signaling pathway;ko04014//Ras signaling pathway	-	-	-	gi|939638221|ref|XP_014270207.1|/0/PREDICTED: protein still life, isoform SIF type 1-like isoform X5 [Halyomorpha halys]
Btabaci_GLEAN_10025665	BTA016331.1,novel_T010242,novel_T010243	58.4	49.58	51.22	40.13	59.18	28.37	64.02	66.54	-	-	-	GO:0005622//intracellular	-	GO:0035556//intracellular signal transduction	gi|646709369|gb|KDR15264.1|/0/hypothetical protein L798_10888 [Zootermopsis nevadensis]
Btabaci_GLEAN_10019727	BTA015725.1,novel_T009892	58.38	36.29	78.58	78.11	35.07	24.33	28.46	25.77	-	-	ko01100//Metabolic pathways;ko00250//Alanine, aspartate and glutamate metabolism;ko04727//GABAergic synapse;ko00650//Butanoate metabolism;ko00410//beta-Alanine metabolism;ko00430//Taurine and hypotaurine metabolism;ko04940//Type I diabetes mellitus	-	-	-	gi|861643682|gb|KMQ94414.1|/4.19665e-174/glutamate decarboxylase-like protein [Lasius niger]
Btabaci_GLEAN_10015768	BTA024389.2,novel_T014579,novel_T014580	58.38	38.99	38.51	60.68	53.35	54.36	63.39	67.94	-	-	ko01100//Metabolic pathways;ko01230//Biosynthesis of amino acids;ko04724//Glutamatergic synapse;ko00250//Alanine, aspartate and glutamate metabolism;ko00630//Glyoxylate and dicarboxylate metabolism;ko04727//GABAergic synapse;ko00220//Arginine biosynthesis;ko00910//Nitrogen metabolism	-	-	-	gi|526124681|gb|AGR65729.1|/2.93939e-158/glutamine synthase [Planococcus citri]
Btabaci_GLEAN_10027130	BTA009013.1,novel_T005688	58.35	58.54	66.05	73.87	57.15	62.4	61.84	58.31	-	-	ko03013//RNA transport;ko05206//MicroRNAs in cancer;ko04120//Ubiquitin mediated proteolysis;ko04064//NF-kappa B signaling pathway	-	GO:0005524//ATP binding;GO:0016874//ligase activity;GO:0019789//SUMO transferase activity	GO:0016925//protein sumoylation	gi|926644751|ref|XP_013788653.1|/1.44814e-113/PREDICTED: SUMO-conjugating enzyme UBC9-B [Limulus polyphemus]
Btabaci_GLEAN_10014263	BTA026855.1,novel_T016116	58.32	55.99	45.15	47.63	47.56	58.97	48.02	52.75	-	-	ko01100//Metabolic pathways;ko00500//Starch and sucrose metabolism;ko00040//Pentose and glucuronate interconversions;ko04976//Bile secretion;ko00983//Drug metabolism - other enzymes;ko00860//Porphyrin and chlorophyll metabolism;ko00830//Retinol metabolism;ko05204//Chemical carcinogenesis;ko00980//Metabolism of xenobiotics by cytochrome P450;ko00053//Ascorbate and aldarate metabolism;ko00982//Drug…	-	-	-	gi|662184526|ref|XP_008472293.1|/1.58889e-36/PREDICTED: 2-hydroxyacylsphingosine 1-beta-galactosyltransferase-like [Diaphorina citri]
Btabaci_GLEAN_10015743	BTA024466.1,novel_T014624	58.3	51.14	71.81	62.71	54.14	29.84	46.29	48.16	-	-	ko05200//Pathways in cancer;ko04062//Chemokine signaling pathway;ko04151//PI3K-Akt signaling pathway;ko04014//Ras signaling pathway;ko05034//Alcoholism;ko04724//Glutamatergic synapse;ko04726//Serotonergic synapse;ko04728//Dopaminergic synapse;ko04740//Olfactory transduction;ko04713//Circadian entrainment;ko05032//Morphine addiction;ko04727//GABAergic synapse;ko04725//Cholinergic synapse;ko04723//…	-	-	GO:0007165//signal transduction	gi|451774884|gb|AGF50187.1|/0/heterotrimeric guanine nucleotide-binding protein beta subunit [Bemisia tabaci]
Btabaci_GLEAN_10009910	BTA003360.1	58.25	91.36	47.72	51.88	90.47	99.92	122.21	102.57	-	-	ko03013//RNA transport	GO:0070993	GO:0003723//RNA binding	GO:0006413//translational initiation	gi|646699510|gb|KDR10090.1|/0/Eukaryotic translation initiation factor 3 subunit B [Zootermopsis nevadensis]
Btabaci_GLEAN_10010524	BTA002260.1,novel_T001475	58.22	55.56	58.36	53.87	59.73	20.31	65.36	57.35	-	-	ko01100//Metabolic pathways;ko00330//Arginine and proline metabolism;ko00480//Glutathione metabolism	-	-	-	gi|642928069|ref|XP_968571.3|/0/PREDICTED: ornithine decarboxylase 1 [Tribolium castaneum]
Btabaci_GLEAN_10020105	BTA014397.1,novel_T009096,novel_T009097,novel_T009098,novel_T009099	58.21	101.31	54.59	47.03	112.17	38.18	69.11	61	-	-	ko04142//Lysosome;ko04978//Mineral absorption	-	-	-	gi|985392846|ref|XP_015363742.1|/2.58176e-66/PREDICTED: protein takeout-like [Diuraphis noxia]
Btabaci_GLEAN_10026175	BTA008358.1,novel_T005380,novel_T005381,novel_T005382,novel_T005383,novel_T005384	58.17	53.69	52.05	52.9	53.03	66.5	60.7	56.54	-	-	ko01100//Metabolic pathways;ko00860//Porphyrin and chlorophyll metabolism	-	-	-	gi|646698714|gb|KDR09740.1|/3.53991e-60/Cob(I)yrinic acid a,c-diamide adenosyltransferase, mitochondrial [Zootermopsis nevadensis]
Btabaci_GLEAN_10020850	BTA011912.1	58.1	48.75	56.18	41.78	43.69	43.15	45.93	52.2	-	-	-	-	-	-	gi|939277280|ref|XP_014259149.1|/1.21148e-68/PREDICTED: uncharacterized protein LOC106672323 [Cimex lectularius]
Btabaci_GLEAN_10004940	BTA011883.1,novel_T007480	57.92	64.02	42.89	38.8	57.15	34.34	50.31	58.46	-	-	-	-	-	-	gi|755974604|ref|XP_011307384.1|/5.83353e-113/PREDICTED: aquaporin-12A [Fopius arisanus]
CUFF38.199.1	BTA008970.1	57.87	87.28	45.97	52.6	69.34	103.63	38.28	53.02	-	-	ko01100//Metabolic pathways;ko05016//Huntington's disease;ko05010//Alzheimer's disease;ko05012//Parkinson's disease;ko00190//Oxidative phosphorylation;ko04932//Non-alcoholic fatty liver disease (NAFLD)	-	GO:0016491//oxidoreductase activity	-	gi|817217825|ref|XP_012284815.1|/1.88998e-35/PREDICTED: NADH dehydrogenase [ubiquinone] 1 alpha subcomplex subunit 2 [Orussus abietinus]
CUFF2.269.1	BTA000263.1,novel_T000256	57.82	29.5	76.32	67.76	40.86	27.15	38.28	52.1	-	-	ko01100//Metabolic pathways;ko00052//Galactose metabolism;ko00510//N-Glycan biosynthesis;ko00514//Other types of O-glycan biosynthesis;ko00601//Glycosphingolipid biosynthesis - lacto and neolacto series;ko00533//Glycosaminoglycan biosynthesis - keratan sulfate	-	-	-	gi|939260784|ref|XP_014250264.1|/1.04715e-126/PREDICTED: beta-1,4-N-acetylgalactosaminyltransferase bre-4-like isoform X1 [Cimex lectularius]
Btabaci_GLEAN_10013452	BTA028011.1,novel_T016767,novel_T016768,novel_T016769,novel_T016770	57.78	72.2	52.16	57.35	75.32	81.85	71.67	70.06	-	-	ko00860//Porphyrin and chlorophyll metabolism;ko00740//Riboflavin metabolism	-	GO:0001671//ATPase activator activity;GO:0051087//chaperone binding	GO:0032781//positive regulation of ATPase activity	gi|240848791|ref|NP_001155793.1|/4.76504e-87/flavin reductase [Acyrthosiphon pisum]
Btabaci_GLEAN_10020739	BTA012309.2,novel_T007719	57.74	49.42	86.23	68.2	44.7	49.89	35.49	54.48	-	-	ko04745//Phototransduction - fly	-	-	-	gi|939257823|ref|XP_014248732.1|/6.14446e-130/PREDICTED: serine/threonine-protein phosphatase rdgC isoform X4 [Cimex lectularius]
Btabaci_GLEAN_10026426	BTA003233.1,novel_T002232	57.68	75.18	51.42	53.73	84.41	106.06	107.34	99.56	-	-	ko03013//RNA transport	GO:0070993	GO:0003723//RNA binding	GO:0006413//translational initiation	gi|746856298|ref|XP_011058832.1|/7.37544e-114/PREDICTED: eukaryotic translation initiation factor 3 subunit G-like isoform X2 [Acromyrmex echinatior]
Btabaci_GLEAN_10019974	BTA014716.1	57.67	43.86	79.98	66.74	44.36	36.49	38.44	48.46	-	-	ko01100//Metabolic pathways;ko00500//Starch and sucrose metabolism;ko00052//Galactose metabolism	-	-	-	gi|636630766|gb|AIA09343.1|/1.36909e-112/alpha-glucosidase [Periplaneta americana]
Btabaci_GLEAN_10024059	BTA029155.1,novel_T017514	57.67	46.14	65.79	65.38	47.49	31.42	45.86	53.71	-	-	-	-	-	-	gi|646713014|gb|KDR17534.1|/2.07519e-113/Interferon regulatory factor 2-binding protein 2-A [Zootermopsis nevadensis]
Btabaci_GLEAN_10026880	BTA024628.1	57.48	55.08	68.53	69.02	69.86	45.36	61.8	71.07	-	-	-	-	-	-	gi|939261329|ref|XP_014250564.1|/2.47031e-84/PREDICTED: poly(U)-specific endoribonuclease homolog [Cimex lectularius]
Btabaci_GLEAN_10011187	BTA001202.1,novel_T000716	57.39	38.37	51.43	65.15	32.06	28.71	40.18	42.77	-	-	-	GO:0005622//intracellular	-	GO:0035556//intracellular signal transduction	gi|646700786|gb|KDR10779.1|/9.32895e-116/SPRY domain-containing SOCS box protein 3 [Zootermopsis nevadensis]
Btabaci_GLEAN_10019185	BTA017359.1,novel_T010784	57.32	58.7	48.24	37.38	50.49	48.84	43.3	50.11	-	-	-	-	-	-	gi|817218951|ref|XP_012285266.1|/5.66882e-17/PREDICTED: ubiquinol-cytochrome-c reductase complex assembly factor 2-like [Orussus abietinus]
Btabaci_GLEAN_10019321	BTA016958.3,novel_T010560,novel_T010561,novel_T010562	57.31	47.49	68.26	65.23	50.87	72.84	48.9	73.16	-	-	ko01100//Metabolic pathways;ko00564//Glycerophospholipid metabolism;ko00565//Ether lipid metabolism	-	-	-	gi|1009367589|gb|KYM92573.1|/0/Lysophosphatidylcholine acyltransferase 2 [Atta colombica]
Btabaci_GLEAN_10025390	BTA019918.1,novel_T012045,novel_T012046,novel_T012047,novel_T012048	57.28	32.44	78.41	60.36	18.48	17.61	23.78	18.07	-	-	ko01100//Metabolic pathways;ko05012//Parkinson's disease;ko05034//Alcoholism;ko04728//Dopaminergic synapse;ko05030//Cocaine addiction;ko00350//Tyrosine metabolism;ko05031//Amphetamine addiction;ko04917//Prolactin signaling pathway	-	-	-	gi|939234511|ref|XP_014245581.1|/0/PREDICTED: tyrosine 3-monooxygenase [Cimex lectularius]
Btabaci_GLEAN_10027002	BTA019432.1,novel_T011701	57.13	63.31	51.96	47.14	65.77	48.97	61.65	74.81	-	-	ko01100//Metabolic pathways;ko04072//Phospholipase D signaling pathway;ko00564//Glycerophospholipid metabolism;ko00561//Glycerolipid metabolism;ko04975//Fat digestion and absorption	GO:0016021//integral component of membrane	GO:0003841//1-acylglycerol-3-phosphate O-acyltransferase activity	GO:0008654//phospholipid biosynthetic process	gi|646708294|gb|KDR14662.1|/5.0405e-122/1-acyl-sn-glycerol-3-phosphate acyltransferase alpha [Zootermopsis nevadensis]
Btabaci_GLEAN_10015050	BTA025654.1,novel_T015338	57.11	44.81	74.13	76.19	95.64	78.52	168.2	185.63	-	-	ko01100//Metabolic pathways;ko00230//Purine metabolism;ko00240//Pyrimidine metabolism;ko00760//Nicotinate and nicotinamide metabolism	-	-	-	gi|815812007|ref|XP_012226945.1|/2.88883e-151/PREDICTED: purine nucleoside phosphorylase-like isoform X2 [Linepithema humile]
Btabaci_GLEAN_10025798	BTA014843.1,novel_T009363	57.08	54.76	60.97	59.48	55.15	36.49	53.98	53.81	-	-	-	-	-	-	gi|646723928|gb|KDR24362.1|/0/DnaJ-like protein subfamily C member 7 [Zootermopsis nevadensis]
Btabaci_GLEAN_10025869	BTA013767.1,novel_T008674,novel_T008675	57.05	86.36	51.97	47.93	51.13	48.06	51.18	42.02	-	-	ko01100//Metabolic pathways;ko05016//Huntington's disease;ko01200//Carbon metabolism;ko05010//Alzheimer's disease;ko05012//Parkinson's disease;ko00190//Oxidative phosphorylation;ko04932//Non-alcoholic fatty liver disease (NAFLD);ko00020//Citrate cycle (TCA cycle)	-	-	-	gi|67043769|gb|AAY63983.1|/1.8275e-161/succinate dehydrogenase iron sulfur subunit B [Lysiphlebus testaceipes]
Btabaci_GLEAN_10001461	BTA019772.1,novel_T011911	56.98	52.19	59.79	34.5	60.87	62.21	48.27	45.76	-	-	-	GO:0005759//mitochondrial matrix	GO:0000774//adenyl-nucleotide exchange factor activity;GO:0042803//protein homodimerization activity;GO:0051087//chaperone binding	GO:0006457//protein folding;GO:0050790//regulation of catalytic activity	gi|1000193498|gb|KXJ69638.1|/3.09848e-51/hypothetical protein RP20_CCG026344 [Aedes albopictus]
Btabaci_GLEAN_10024527	BTA026148.1,novel_T015611	56.93	47.62	71.59	71.95	39.87	18.42	35	38.67	-	-	-	-	-	-	gi|985395516|ref|XP_015365211.1|/3.67433e-103/PREDICTED: uncharacterized protein LOC107162715 [Diuraphis noxia]
Btabaci_GLEAN_10007006	BTA008155.2,novel_T005285,novel_T005286,novel_T005287,novel_T005288,novel_T005289,novel_T005290,novel_T005291,novel_T005292,novel_T005293,novel_T005294,novel_T005295,novel_T005296	56.83	71.39	62.47	54.08	69.35	66.63	78.99	69.75	-	-	ko05146//Amoebiasis	-	-	-	gi|557756140|ref|XP_005177808.1|/4.22795e-66/PREDICTED: antichymotrypsin-2-like [Musca domestica]
Btabaci_GLEAN_10008094	BTA006273.1,novel_T003962	56.82	66.85	66.59	58.57	73.1	62.24	64.54	68.69	-	-	ko05168//Herpes simplex infection;ko03040//Spliceosome	-	-	-	gi|662213161|ref|XP_008480354.1|/1.0859e-75/PREDICTED: RNA-binding protein Rsf1 isoform X2 [Diaphorina citri]
Btabaci_GLEAN_10004601	BTA012523.1,novel_T007824,novel_T007825	56.72	75.84	49.62	47.13	90.39	82.88	99.09	96.64	-	-	-	-	-	-	-
CUFF101.17.1	BTA024578.2,novel_T014719	56.69	22.73	26.65	64.91	27.58	10.17	25.01	38.81	-	-	ko01100//Metabolic pathways;ko00230//Purine metabolism;ko05169//Epstein-Barr virus infection;ko05016//Huntington's disease;ko00240//Pyrimidine metabolism;ko05168//Herpes simplex infection;ko03020//RNA polymerase	-	-	-	gi|805818585|ref|XP_012149450.1|/2.89488e-09/PREDICTED: uncharacterized serine-rich protein C215.13-like [Megachile rotundata]
Btabaci_GLEAN_10023626	BTA001078.1,novel_T000615	56.67	49.28	71.44	71.27	45.61	64.51	47.97	58.51	-	-	-	-	-	-	gi|964122886|ref|XP_001960843.2|/4.01251e-117/uncharacterized protein Dana_GF13565, isoform A [Drosophila ananassae]
Btabaci_GLEAN_10020560	BTA012900.1,novel_T008062,novel_T008063,novel_T008064,novel_T008065,novel_T008066,novel_T008067,novel_T008068,novel_T008069,novel_T008070,novel_T008071,novel_T008072,novel_T008073,novel_T008074,novel_T008075,novel_T008076,novel_T008077,novel_T008078,novel_T008079,novel_T008080,novel_T008081,novel_T008082,novel_T008083,novel_T008084,novel_T008085	56.63	49.48	69.82	66.23	40.15	29.59	37.37	38.44	-	-	ko01100//Metabolic pathways;ko00310//Lysine degradation	-	-	-	gi|939234590|ref|XP_014245986.1|/0/PREDICTED: alpha-aminoadipic semialdehyde synthase, mitochondrial isoform X2 [Cimex lectularius]
Btabaci_GLEAN_10010255	BTA002735.1,novel_T001797	56.62	56.68	67.39	61.75	53.65	50.54	57.54	58.74	-	-	-	-	-	-	gi|795105744|ref|XP_011881623.1|/4.62792e-145/PREDICTED: probable serine incorporator isoform X4 [Vollenhovia emeryi]
Btabaci_GLEAN_10022104	BTA007295.1,novel_T004681	56.56	54.57	51.24	41.04	68.57	85.72	51.14	69.85	-	-	-	GO:0016021//integral component of membrane	-	-	gi|195378908|ref|XP_002048223.1|/2.49574e-43/uncharacterized protein Dvir_GJ13848 [Drosophila virilis]
Btabaci_GLEAN_10006830	BTA008499.1	56.54	33.88	74	49.4	37.48	59.83	33.63	42.8	-	-	-	-	-	-	gi|930653782|gb|KPI96118.1|/2.00434e-26/hypothetical protein RR46_06852 [Papilio xuthus]
Btabaci_GLEAN_10020740	BTA012310.1	56.42	76.93	45.07	48.96	76.86	82.82	60.13	64.66	-	-	-	-	-	-	gi|646717136|gb|KDR20117.1|/8.08739e-93/Transmembrane emp24 domain-containing protein [Zootermopsis nevadensis]
Btabaci_GLEAN_10014178	BTA026974.1	56.42	65.29	43.1	54.41	38.2	0	26.85	25.22	-	-	ko01100//Metabolic pathways;ko01200//Carbon metabolism;ko01230//Biosynthesis of amino acids;ko00250//Alanine, aspartate and glutamate metabolism;ko01210//2-Oxocarboxylic acid metabolism;ko00220//Arginine biosynthesis	GO:0005622//intracellular	GO:0005096//GTPase activator activity	GO:0007264//small GTPase mediated signal transduction;GO:0043547//positive regulation of GTPase activity	gi|610259666|gb|AHW58022.1|/0/alanine aminotransferase 1 [Sogatella furcifera]
Btabaci_GLEAN_10005661	BTA010559.1	56.41	60.38	75.93	64.49	61.75	40.01	53.38	48.74	-	-	-	-	-	-	gi|646721949|gb|KDR23093.1|/2.28649e-163/Phosphatase PTC7-like protein [Zootermopsis nevadensis]
Btabaci_GLEAN_10016550	BTA023011.1,novel_T014017	56.4	76.05	60.68	73.8	83.84	86.08	102.51	87.48	-	-	-	-	-	-	gi|749753749|ref|XP_011139276.1|/9.9502e-50/PREDICTED: double-stranded RNA-specific editase 1-like isoform X2 [Harpegnathos saltator]
Btabaci_GLEAN_10024514	BTA026134.1,novel_T015598	56.39	54.47	56.52	60.52	62.38	67.8	60.71	72.59	-	-	ko01100//Metabolic pathways;ko00562//Inositol phosphate metabolism	-	-	-	gi|321466120|gb|EFX77117.1|/0/hypothetical protein DAPPUDRAFT_198542 [Daphnia pulex]
Btabaci_GLEAN_10022450	BTA005801.1,novel_T003749,novel_T003750,novel_T003751	56.36	66.1	66.77	66.58	68.76	47.31	59.48	62.2	-	-	-	-	-	-	gi|826498308|ref|XP_012541505.1|/4.69753e-73/PREDICTED: androgen-induced gene 1 protein-like isoform X2 [Monomorium pharaonis]
Btabaci_GLEAN_10009747	BTA003600.1,novel_T002516,novel_T002517	56.36	70.77	63.61	62.45	67.63	24.38	63.4	56.11	-	-	ko03013//RNA transport;ko03015//mRNA surveillance pathway	-	-	-	gi|766931942|ref|XP_011498176.1|/1.367e-20/PREDICTED: zinc finger CCCH domain-containing protein 13-like [Ceratosolen solmsi marchali]
Btabaci_GLEAN_10025598	BTA017182.1	56.34	69.18	49.9	39.44	80.31	63.94	66.52	81.98	-	-	ko01100//Metabolic pathways;ko01230//Biosynthesis of amino acids;ko00330//Arginine and proline metabolism	-	GO:0004735//pyrroline-5-carboxylate reductase activity	GO:0055114//oxidation-reduction process;GO:0055129//L-proline biosynthetic process	gi|242018398|ref|XP_002429664.1|/1.81323e-118/Pyrroline-5-carboxylate reductase, putative [Pediculus humanus corporis]
Btabaci_GLEAN_10015583	BTA024789.1,novel_T014856,novel_T014857,novel_T014858,novel_T014859,novel_T014860,novel_T014861,novel_T014862,novel_T014863,novel_T014864,novel_T014865	56.29	44.29	73.88	68.96	44.14	35.13	40.71	45.94	-	-	-	-	-	-	gi|939272809|ref|XP_014256710.1|/0/PREDICTED: RIMS-binding protein 2-like isoform X7 [Cimex lectularius]
Btabaci_GLEAN_10022568	BTA005351.1	56.21	69.59	54.73	54.53	73.74	66.4	92.12	91.99	-	-	ko00970//Aminoacyl-tRNA biosynthesis	-	-	-	gi|501296544|dbj|BAN20989.1|/0/tyrosyl-tRNA synthetase [Riptortus pedestris]
CUFF10.428.1	BTA002420.1	56.2	57.4	57.66	47.44	60.41	62.04	37.1	80.97	-	-	-	-	-	-	gi|646695636|gb|KDR08415.1|/1.31464e-42/DET1- and DDB1-associated protein 1 [Zootermopsis nevadensis]
Btabaci_GLEAN_10022770	BTA004488.1,novel_T003039	56.18	51.43	57.37	49.8	39.31	30.77	56.01	42.78	-	-	ko05169//Epstein-Barr virus infection;ko05200//Pathways in cancer;ko04062//Chemokine signaling pathway;ko04151//PI3K-Akt signaling pathway;ko04919//Thyroid hormone signaling pathway;ko04510//Focal adhesion;ko05010//Alzheimer's disease;ko05166//HTLV-I infection;ko04910//Insulin signaling pathway;ko04360//Axon guidance;ko04390//Hippo signaling pathway;ko04310//Wnt signaling pathway;ko04110//Cell cy…	-	-	-	gi|646719152|gb|KDR21360.1|/0/hypothetical protein L798_03136, partial [Zootermopsis nevadensis]
Btabaci_GLEAN_10012786	BTA028940.1,novel_T017315	56.13	64.83	47.92	45.1	73.45	68.13	90.38	93.21	-	-	ko01100//Metabolic pathways;ko01200//Carbon metabolism;ko01212//Fatty acid metabolism;ko00280//Valine, leucine and isoleucine degradation;ko00071//Fatty acid degradation;ko03320//PPAR signaling pathway;ko00640//Propanoate metabolism;ko00410//beta-Alanine metabolism	-	GO:0003995//acyl-CoA dehydrogenase activity;GO:0050660//flavin adenine dinucleotide binding	GO:0055114//oxidation-reduction process	gi|91079744|ref|XP_970506.1|/0/PREDICTED: probable medium-chain specific acyl-CoA dehydrogenase, mitochondrial [Tribolium castaneum]
Btabaci_GLEAN_10025639	BTA016738.2,novel_T010461,novel_T010462,novel_T010463	56.12	48.47	56.35	54.6	111.1	86.3	164.02	176.9	-	-	-	-	-	-	gi|646698089|gb|KDR09436.1|/3.38937e-164/Calcium-independent phospholipase A2-gamma [Zootermopsis nevadensis]
Btabaci_GLEAN_10027098	BTA014806.1,novel_T009323	56.09	78.85	36.58	37.7	80.74	141.1	132.68	123.23	-	-	ko03010//Ribosome	GO:0005840//ribosome	GO:0003735//structural constituent of ribosome	GO:0006412//translation	gi|264667437|gb|ACY71304.1|/1.03773e-76/ribosomal protein S17 [Chrysomela tremula]
Btabaci_GLEAN_10024340	BTA027625.1,novel_T016635,novel_T016636	56.01	53.48	50.53	51.22	45.3	46.54	53.7	48.47	-	-	ko01100//Metabolic pathways;ko00860//Porphyrin and chlorophyll metabolism	-	-	-	gi|646705050|gb|KDR12951.1|/5.97366e-80/hypothetical protein L798_12908 [Zootermopsis nevadensis]
Btabaci_GLEAN_10021893	BTA007899.1,novel_T005078,novel_T005079	56.01	64.59	48.49	47.81	61.64	78.89	79.36	71.59	-	-	ko05169//Epstein-Barr virus infection;ko03050//Proteasome	-	-	-	gi|662187287|ref|XP_008486389.1|/0/PREDICTED: 26S protease regulatory subunit 6A-B [Diaphorina citri]
CUFF62.563.1	BTA015111.1	55.96	51.08	63.4	46.02	65.73	134.89	46.69	76.79	-	-	-	-	-	-	-
Btabaci_GLEAN_10007407	BTA007463.1,novel_T004810,novel_T004811	55.88	53.42	73.5	59.81	48.32	21.35	45.07	45.34	-	-	-	-	-	-	gi|1000745257|ref|XP_015595367.1|/2.90453e-138/PREDICTED: WD repeat domain phosphoinositide-interacting protein 2 isoform X13 [Cephus cinctus]
Btabaci_GLEAN_10023009	BTA003568.1,novel_T002476	55.87	54.06	64.58	56.99	48.89	35.76	43.7	33.61	-	-	ko02010//ABC transporters	-	-	-	gi|939694052|ref|XP_014291102.1|/0/PREDICTED: ATP-binding cassette sub-family G member 1-like isoform X2 [Halyomorpha halys]
Btabaci_GLEAN_10007848	BTA006656.1	55.83	37.12	60.45	56.98	38.89	18.41	37.55	42.42	-	-	-	-	-	-	gi|939280893|ref|XP_014261068.1|/8.02469e-167/PREDICTED: MAP kinase-activating death domain protein isoform X10 [Cimex lectularius]
CUFF1.70.1	BTA000040.1,novel_T000068	55.78	54.75	75.64	56.71	62.19	92.84	45.44	61.18	-	-	-	-	-	-	-
Btabaci_GLEAN_10021134	BTA010882.1,novel_T006900	55.67	44.78	69.87	61.38	51.83	32.08	38.98	49.94	-	-	-	-	-	-	gi|807042600|ref|XP_012161768.1|/1.80329e-143/PREDICTED: fatty-acid amide hydrolase 2 isoform X3 [Ceratitis capitata]
Btabaci_GLEAN_10020127	BTA014318.1,novel_T009049,novel_T009050	55.54	40.34	67.53	59.6	38.19	35.27	43.44	47.95	-	-	-	-	-	-	gi|170056380|ref|XP_001864003.1|/0/conserved hypothetical protein [Culex quinquefasciatus]
Btabaci_GLEAN_10024212	BTA028499.1,novel_T016992,novel_T016993,novel_T016994,novel_T016995,novel_T016996	55.49	44.02	68.08	62.97	40.17	32.65	39.06	41.47	-	-	-	-	-	-	gi|646719636|gb|KDR21676.1|/7.16092e-92/Microtubule plus-end tracking protein TIP150 [Zootermopsis nevadensis]
Btabaci_GLEAN_10026029	BTA010989.1,novel_T006950	55.46	46.38	75.12	72.14	56.58	75.41	51.73	62.8	-	-	ko01100//Metabolic pathways;ko00350//Tyrosine metabolism	-	GO:0004497//monooxygenase activity	-	gi|646697365|gb|KDR09110.1|/0/hypothetical protein L798_01066, partial [Zootermopsis nevadensis]
Btabaci_GLEAN_10012629	BTA029250.1,novel_T017575,novel_T017576,novel_T017577,novel_T017578,novel_T017579,novel_T017580	55.39	37.88	69.45	71.84	36.47	34.88	33.45	36.33	-	-	-	GO:0016021//integral component of membrane	-	-	gi|646689998|gb|KDR06746.1|/2.51959e-37/hypothetical protein L798_03890 [Zootermopsis nevadensis]
Btabaci_GLEAN_10000407	BTA024005.1	55.21	77.32	49.18	44.79	61.01	65.73	81.41	64.59	-	-	ko04144//Endocytosis;ko04015//Rap1 signaling pathway;ko04611//Platelet activation;ko04910//Insulin signaling pathway;ko04390//Hippo signaling pathway;ko04391//Hippo signaling pathway - fly;ko04530//Tight junction	-	-	-	gi|939687932|ref|XP_014287872.1|/6.32297e-91/PREDICTED: sugar transporter ERD6-like 6 isoform X3 [Halyomorpha halys]
Btabaci_GLEAN_10005969	BTA010012.1,novel_T006342	55.17	64.02	51.78	50.65	58.19	44.78	70.16	64.6	-	-	ko01100//Metabolic pathways;ko00230//Purine metabolism;ko04146//Peroxisome;ko00983//Drug metabolism - other enzymes;ko00232//Caffeine metabolism	-	-	-	gi|646714946|gb|KDR18732.1|/0/Xanthine dehydrogenase [Zootermopsis nevadensis]
Btabaci_GLEAN_10025796	BTA014841.1,novel_T009362	55.12	46	48.1	43.29	60.98	74.14	79.11	76.95	-	-	ko04910//Insulin signaling pathway;ko05410//Hypertrophic cardiomyopathy (HCM);ko04152//AMPK signaling pathway;ko04932//Non-alcoholic fatty liver disease (NAFLD);ko04931//Insulin resistance;ko04921//Oxytocin signaling pathway;ko04068//FoxO signaling pathway;ko04922//Glucagon signaling pathway;ko04920//Adipocytokine signaling pathway;ko04710//Circadian rhythm	-	-	-	gi|646708201|gb|KDR14603.1|/3.02781e-144/5'-AMP-activated protein kinase subunit beta-1 [Zootermopsis nevadensis]
Btabaci_GLEAN_10026546	BTA001283.1,novel_T000753	55.1	38.7	68.82	64.59	55.17	95.13	49.46	74.07	-	-	-	-	-	-	gi|646713444|gb|KDR17790.1|/1.54957e-24/Neuroparsin-A [Zootermopsis nevadensis]
Btabaci_GLEAN_10019864	BTA015193.1,novel_T009504,novel_T009505,novel_T009506,novel_T009507,novel_T009508,novel_T009509,novel_T009510,novel_T009511	55.09	40.58	84.33	69.33	40.54	53.13	44.23	48.41	-	-	-	-	-	-	gi|646707584|gb|KDR14273.1|/5.32021e-148/POU domain, class 6, transcription factor 2 [Zootermopsis nevadensis]
Btabaci_GLEAN_10006308	BTA009435.1,novel_T006001	55.08	76.09	60.77	60.41	77.77	87.96	80.3	66.34	-	-	ko05203//Viral carcinogenesis	-	-	-	gi|646722951|gb|KDR23745.1|/3.9891e-15/DnaJ-like protein 60 [Zootermopsis nevadensis]
Btabaci_GLEAN_10023381	BTA002060.1,novel_T001350	54.98	54.25	58.99	58.91	52.43	43.09	47.7	47.32	-	-	ko01100//Metabolic pathways;ko04072//Phospholipase D signaling pathway;ko00564//Glycerophospholipid metabolism;ko00561//Glycerolipid metabolism	-	-	-	gi|936683939|ref|XP_014239032.1|/1.32818e-91/PREDICTED: 1-acyl-sn-glycerol-3-phosphate acyltransferase gamma-like [Trichogramma pretiosum]
Btabaci_GLEAN_10027138	BTA009021.1,novel_T005692,novel_T005693,novel_T005694,novel_T005695	54.97	48.78	50.92	43.43	51.1	26.24	50.25	38.72	-	-	-	-	-	-	gi|939639493|ref|XP_014270646.1|/1.56739e-99/PREDICTED: cytospin-A-like isoform X2 [Halyomorpha halys]
Btabaci_GLEAN_10027070	BTA014776.1,novel_T009307	54.97	35.9	75.92	71.18	42.98	54.28	41.97	55.58	-	-	-	-	-	-	gi|646714778|gb|KDR18632.1|/2.22753e-105/WSCD family member [Zootermopsis nevadensis]
Btabaci_GLEAN_10017169	BTA021856.1,novel_T013407,novel_T013408,novel_T013409,novel_T013410,novel_T013411,novel_T013412,novel_T013413,novel_T013414,novel_T013415,novel_T013416,novel_T013417,novel_T013418,novel_T013419	54.85	50.43	55.34	52.31	38.74	15.63	36.79	29.49	-	-	-	-	-	-	gi|998519571|ref|XP_015520726.1|/0/PREDICTED: LOW QUALITY PROTEIN: dystonin isoform X9 [Neodiprion lecontei]
Btabaci_GLEAN_10013410	BTA028080.1,novel_T016806	54.77	40.72	73.84	65.16	42.38	30.62	38.86	44.83	-	-	-	GO:0016021//integral component of membrane;GO:0030054//cell junction;GO:0045211//postsynaptic membrane	GO:0005230//extracellular ligand-gated ion channel activity	GO:0098655//cation transmembrane transport	gi|914748522|gb|AKV94621.1|/0/nicotinic acetylcholine receptor alpha2 variant A [Periplaneta americana]
Btabaci_GLEAN_10019687	BTA015920.2,novel_T010023	54.73	80.29	60.04	36.62	92.94	81.81	91.42	82.78	-	-	-	-	-	-	-
CUFF43.658.1	BTA010384.1,novel_T006544	54.71	60.01	82.47	74.43	71.37	131.99	64.37	92.29	-	-	ko04142//Lysosome	-	-	-	gi|194900794|ref|XP_001979940.1|/2.86618e-12/uncharacterized protein Dere_GG21229 [Drosophila erecta]
CUFF30.143.2	BTA007064.1,novel_T004509	54.7	63.12	49.1	49.47	67.64	111.23	71.14	83.47	-	-	-	-	-	-	-
Btabaci_GLEAN_10021336	BTA010219.1	54.47	47.28	51.38	54.17	64.74	54.34	73.28	82.31	-	-	-	-	GO:0003700//transcription factor activity, sequence-specific DNA binding;GO:0043565//sequence-specific DNA binding	GO:0006355//regulation of transcription, DNA-templated	gi|646699579|gb|KDR10133.1|/9.8859e-47/cAMP-responsive element-binding protein-like 2 [Zootermopsis nevadensis]
Btabaci_GLEAN_10009475	BTA004061.1	54.45	105.39	62.24	56.67	87.67	114.28	166.96	150.88	-	-	ko03010//Ribosome	-	-	-	gi|559373032|gb|AHB12474.1|/1.21334e-88/60S Ribosomal Protein L27A [Pantala flavescens]
Btabaci_GLEAN_10002478	BTA016982.1,novel_T010576,novel_T010577,novel_T010578,novel_T010579	54.43	74.9	54.2	49.54	89.5	97.33	114.86	105.76	-	-	ko04142//Lysosome;ko05205//Proteoglycans in cancer;ko04145//Phagosome;ko04612//Antigen processing and presentation;ko05323//Rheumatoid arthritis	-	GO:0016787//hydrolase activity	-	gi|749798912|ref|XP_011152977.1|/1.14515e-141/PREDICTED: cathepsin L [Harpegnathos saltator]
CUFF11.446.2	BTA002605.1,novel_T001734	54.35	49.12	65.22	59.05	46.12	50.59	48.76	52.04	-	-	-	-	-	-	gi|939682645|ref|XP_014286144.1|/1.13014e-103/PREDICTED: tetraspanin-31-B isoform X2 [Halyomorpha halys]
Btabaci_GLEAN_10021928	BTA007848.1,novel_T005035,novel_T005036,novel_T005037,novel_T005038,novel_T005039,novel_T005040,novel_T005041	54.34	35.65	68.47	56.51	38.9	22.37	31.05	34.72	-	-	-	-	-	-	gi|1008431146|ref|XP_015833125.1|/0/PREDICTED: uncharacterized protein LOC103312261 isoform X3 [Tribolium castaneum]
Btabaci_GLEAN_10022442	BTA005890.1,novel_T003817	54.34	51.85	61.53	53.34	38.78	7.66	31.51	30.94	-	-	ko04530//Tight junction	-	-	-	gi|662194361|ref|XP_008470128.1|/0/PREDICTED: spectrin beta chain [Diaphorina citri]
Btabaci_GLEAN_10019128	BTA017525.2,novel_T010829,novel_T010830	54.26	41.64	59.07	62.36	39.85	22.88	31.34	34.98	-	-	ko04614//Renin-angiotensin system	-	-	-	gi|939660854|ref|XP_014278307.1|/0/PREDICTED: endoplasmic reticulum aminopeptidase 1-like [Halyomorpha halys]
Btabaci_GLEAN_10017320	BTA021509.1,novel_T013195,novel_T013196	54.2	34.84	61.47	64.44	36.01	29.72	36.47	43.49	-	-	-	GO:0005887//integral component of plasma membrane	GO:0015179//L-amino acid transmembrane transporter activity;GO:0015297//antiporter activity	GO:0003333//amino acid transmembrane transport;GO:0015807//L-amino acid transport	gi|939245777|ref|XP_014242275.1|/0/PREDICTED: cationic amino acid transporter 4 [Cimex lectularius]
Btabaci_GLEAN_10021039	BTA011217.1,novel_T007058,novel_T007059,novel_T007060,novel_T007061,novel_T007062,novel_T007063,novel_T007064,novel_T007065,novel_T007066,novel_T007067	54.15	42.77	60.86	58.15	39.62	31.9	34.99	36.9	-	-	ko04115//p53 signaling pathway	GO:0016021//integral component of membrane	GO:0003676//nucleic acid binding;GO:0004803//transposase activity	GO:0006313//transposition, DNA-mediated	gi|985397299|ref|XP_015366188.1|/2.26874e-106/PREDICTED: transmembrane protein 47 isoform X1 [Diuraphis noxia]
Btabaci_GLEAN_10019381	BTA016826.1,novel_T010500,novel_T010501	54.08	63.38	45.54	38.02	65.01	39.33	62.69	58.83	-	-	-	-	-	-	gi|1008427872|ref|XP_015839059.1|/3.78856e-98/PREDICTED: LOW QUALITY PROTEIN: protein FAM184A [Tribolium castaneum]
CUFF81.78.1	BTA019530.2,novel_T011815	54.03	44.76	51.53	61.11	50.99	51.88	45.81	52.3	-	-	-	-	-	-	gi|646717382|gb|KDR20257.1|/0/hypothetical protein L798_05042, partial [Zootermopsis nevadensis]
Btabaci_GLEAN_10019382	BTA016827.1,novel_T010502,novel_T010503,novel_T010504	53.93	43.52	66.95	70.36	37.51	30.22	28.27	34.03	-	-	ko04721//Synaptic vesicle cycle	-	-	-	gi|939263031|ref|XP_014251465.1|/0/PREDICTED: protein ROP isoform X2 [Cimex lectularius]
Btabaci_GLEAN_10014140	BTA027048.1,novel_T016276	53.91	46.73	76.16	65.57	48.19	85.54	38.65	64.03	-	-	-	-	-	-	gi|662186259|ref|XP_008481271.1|/6.4377e-54/PREDICTED: uncharacterized protein LOC103517994 [Diaphorina citri]
Btabaci_GLEAN_10024556	BTA026024.1,novel_T015528	53.81	41.38	63.24	57.11	32.67	25.77	28.99	27.98	-	-	-	-	-	-	gi|952541722|gb|KRT86344.1|/1.34683e-130/hypothetical protein AMK59_2223, partial [Oryctes borbonicus]
Btabaci_GLEAN_10022164	BTA007001.1,novel_T004453	53.74	60.48	40.99	51.62	55.28	60.24	57.68	62.02	-	-	-	-	-	-	gi|662187959|ref|XP_008487632.1|/2.98654e-18/PREDICTED: uncharacterized protein LOC103524398 [Diaphorina citri]
Btabaci_GLEAN_10002355	BTA017244.1,novel_T010754,novel_T010755,novel_T010756,novel_T010757,novel_T010758,novel_T010759,novel_T010760	53.49	74.63	46.52	42.36	100.14	56.82	130.91	92.99	-	-	ko01100//Metabolic pathways;ko04910//Insulin signaling pathway;ko04152//AMPK signaling pathway;ko01212//Fatty acid metabolism;ko00620//Pyruvate metabolism;ko04922//Glucagon signaling pathway;ko00061//Fatty acid biosynthesis;ko00640//Propanoate metabolism	-	-	-	gi|1008442374|ref|XP_015836338.1|/0/PREDICTED: acetyl-CoA carboxylase isoform X2 [Tribolium castaneum]
Btabaci_GLEAN_10017310	BTA021525.1,novel_T013206,novel_T013207,novel_T013208	53.49	48.96	60.11	55.14	49.93	34.95	44.75	43.9	-	-	ko01100//Metabolic pathways;ko00500//Starch and sucrose metabolism	-	-	-	gi|410718533|gb|AFV79627.1|/0/membrane-bound trehalase [Bemisia tabaci]
Btabaci_GLEAN_10011347	BTA000942.1,novel_T000553,novel_T000554	53.4	55.41	49.57	42.5	50.69	55.45	49.82	49.25	-	-	ko01100//Metabolic pathways;ko00040//Pentose and glucuronate interconversions;ko00052//Galactose metabolism;ko00561//Glycerolipid metabolism;ko00051//Fructose and mannose metabolism	-	-	-	gi|939657221|ref|XP_014276893.1|/2.37328e-111/PREDICTED: 1,5-anhydro-D-fructose reductase-like [Halyomorpha halys]
Btabaci_GLEAN_10024222	BTA028511.1,novel_T017003,novel_T017004	53.39	47.31	52.58	55.64	47.63	44.53	39.86	41.16	-	-	-	-	-	-	gi|646713047|gb|KDR17548.1|/0/CAS1 domain-containing protein 1, partial [Zootermopsis nevadensis]
Btabaci_GLEAN_10025227	BTA021025.1,novel_T012847,novel_T012848	53.38	82.1	44.83	39.52	70.66	62.57	90.23	66.05	-	-	-	-	-	-	gi|939638267|ref|XP_014270226.1|/2.93705e-135/PREDICTED: uncharacterized protein LOC106677054 [Halyomorpha halys]
Btabaci_GLEAN_10025370	BTA019900.1,novel_T012026,novel_T012027,novel_T012028	53.36	53.92	61.99	56.28	50.39	52.76	53.23	50.43	-	-	-	-	-	-	-
Btabaci_GLEAN_10015732	BTA024480.1	53.29	35.03	47.98	56.47	43.67	24.53	44.06	45.63	-	-	ko05146//Amoebiasis;ko05110//Vibrio cholerae infection	-	-	-	gi|939628328|ref|XP_014270862.1|/7.69602e-30/PREDICTED: adhesion G-protein coupled receptor D1-like [Halyomorpha halys]
Btabaci_GLEAN_10026892	BTA024642.2,novel_T014795	53.26	41.53	58.63	58.65	47.24	40.51	38.84	46.62	-	-	ko04721//Synaptic vesicle cycle	GO:0005622//intracellular	-	GO:0006886//intracellular protein transport	gi|646711678|gb|KDR16769.1|/0/Soluble NSF attachment protein [Zootermopsis nevadensis]
CUFF87.530.1	BTA021020.1,novel_T012842,novel_T012843,novel_T012844,novel_T012845	53.23	49.14	65.05	52.04	39.78	40.91	46.09	46.9	-	-	-	-	-	-	gi|939692205|ref|XP_014290121.1|/0/PREDICTED: CLK4-associating serine/arginine rich protein [Halyomorpha halys]
Btabaci_GLEAN_10001801	BTA018874.1,novel_T011334,novel_T011335,novel_T011336,novel_T011337	53.21	44.44	58.75	59.05	46.12	54.5	42.61	42.24	-	-	-	GO:0016592//mediator complex	GO:0001104//RNA polymerase II transcription cofactor activity	GO:0006357//regulation of transcription from RNA polymerase II promoter	gi|939683228|ref|XP_014286332.1|/9.58125e-30/PREDICTED: mediator of RNA polymerase II transcription subunit 18 [Halyomorpha halys]
Btabaci_GLEAN_10020472	BTA013206.1,novel_T008298	53.09	74.71	40.91	43.35	43.15	29.19	33.55	27.71	-	-	ko01100//Metabolic pathways;ko01200//Carbon metabolism;ko01230//Biosynthesis of amino acids;ko00020//Citrate cycle (TCA cycle);ko01210//2-Oxocarboxylic acid metabolism	GO:0005739//mitochondrion	GO:0000287//magnesium ion binding;GO:0004449//isocitrate dehydrogenase (NAD+) activity;GO:0051287//NAD binding	GO:0006099//tricarboxylic acid cycle	gi|332375630|gb|AEE62956.1|/0/unknown [Dendroctonus ponderosae]
Btabaci_GLEAN_10016659	BTA022816.1,novel_T013897,novel_T013898	53.07	44.14	50.03	47.86	44.36	49.97	39.79	45.99	-	-	-	-	-	-	gi|646709227|gb|KDR15208.1|/0/Transmembrane 9 superfamily member 4 [Zootermopsis nevadensis]
Btabaci_GLEAN_10019537	BTA016273.1,novel_T010197	53.06	38.71	58.16	55.9	40.81	28.69	43.78	48.38	-	-	-	-	-	-	gi|939278989|ref|XP_014260058.1|/5.61743e-35/PREDICTED: latrophilin Cirl-like isoform X2 [Cimex lectularius]
Btabaci_GLEAN_10019905	BTA015118.2,novel_T009480	53.04	39.77	56.24	53.85	43.85	40.38	36.64	47.85	-	-	ko05016//Huntington's disease	GO:0005576//extracellular region	GO:0008061//chitin binding	GO:0006030//chitin metabolic process	gi|568249304|gb|ETN59112.1|/2.35435e-72/hypothetical protein AND_009300 [Anopheles darlingi]
Btabaci_GLEAN_10010389	BTA002513.1,novel_T001687,novel_T001688	52.97	86.14	44.29	34.83	70.03	73.65	74.89	63.14	-	-	-	-	-	-	gi|985393089|ref|XP_015363877.1|/0/PREDICTED: selenium-binding protein 1-B [Diuraphis noxia]
Btabaci_GLEAN_10024902	BTA023875.1	52.96	95.5	62.9	56.84	112.71	194.64	150.23	146.62	-	-	ko03010//Ribosome	GO:0022627//cytosolic small ribosomal subunit	GO:0003735//structural constituent of ribosome	GO:0002181//cytoplasmic translation	gi|17975567|ref|NP_524709.1|/2.49816e-82/ribosomal protein S15Aa, isoform D [Drosophila melanogaster]
Btabaci_GLEAN_10008820	BTA005093.1,novel_T003378,novel_T003379,novel_T003380	52.93	39.7	60.86	54.26	38.36	19.87	30.75	34.87	-	-	-	-	-	-	gi|662207377|ref|XP_008477188.1|/7.57743e-128/PREDICTED: growth arrest-specific protein 2-like, partial [Diaphorina citri]
Btabaci_GLEAN_10021533	BTA009312.1,novel_T005943	52.84	65.59	51.28	51.58	59.5	61.92	55.85	54.1	-	-	-	GO:0016021//integral component of membrane	-	-	gi|939256298|ref|XP_014247934.1|/1.91888e-153/PREDICTED: cyclin-C [Cimex lectularius]
Btabaci_GLEAN_10023217	BTA002770.1,novel_T001847,novel_T001848	52.77	55.52	48.69	43.31	48.12	32.15	41.5	43.29	-	-	-	-	-	-	gi|815896365|ref|XP_012247076.1|/1.19355e-65/PREDICTED: coenzyme Q-binding protein COQ10 homolog B, mitochondrial isoform X2 [Bombus impatiens]
Btabaci_GLEAN_10021206	BTA010595.2,novel_T006705,novel_T006706,novel_T006707,novel_T006708,novel_T006709,novel_T006710,novel_T006711,novel_T006712,novel_T006713,novel_T006714	52.76	42.3	57.41	53.99	40.11	24.65	43.93	40.85	-	-	-	-	-	-	gi|939684086|ref|XP_014286617.1|/0/PREDICTED: trithorax group protein osa [Halyomorpha halys]
Btabaci_GLEAN_10007555	BTA007161.1,novel_T004588,novel_T004589,novel_T004590,novel_T004591,novel_T004592,novel_T004593,novel_T004594,novel_T004595,novel_T004596,novel_T004597	52.74	61.21	52.34	63.04	53.46	39.88	43.63	44.74	-	-	ko01100//Metabolic pathways;ko00270//Cysteine and methionine metabolism;ko00330//Arginine and proline metabolism;ko00480//Glutathione metabolism;ko00410//beta-Alanine metabolism	-	-	-	gi|646701507|gb|KDR11197.1|/4.24015e-101/Spermine synthase [Zootermopsis nevadensis]
Btabaci_GLEAN_10020686	BTA012515.1,novel_T007813	52.73	85.37	46.65	39.7	78.74	89.35	94.77	88.8	-	-	ko03013//RNA transport	GO:0005852//eukaryotic translation initiation factor 3 complex;GO:0016282//eukaryotic 43S preinitiation complex;GO:0033290//eukaryotic 48S preinitiation complex	GO:0003743//translation initiation factor activity	GO:0001731//formation of translation preinitiation complex;GO:0006446//regulation of translational initiation	gi|91080113|ref|XP_967415.1|/1.36469e-155/PREDICTED: eukaryotic translation initiation factor 3 subunit I [Tribolium castaneum]
Btabaci_GLEAN_10013927	BTA027293.1,novel_T016390	52.69	32.8	46.4	58.48	40.08	66.25	39.97	45.36	-	-	-	-	-	-	-
Btabaci_GLEAN_10019011	BTA017832.1,novel_T011040	52.68	36.65	62.96	61.93	38.58	43.15	37.94	46.59	-	-	ko00230//Purine metabolism;ko04611//Platelet activation;ko04022//cGMP-PKG signaling pathway;ko04970//Salivary secretion;ko04270//Vascular smooth muscle contraction;ko04921//Oxytocin signaling pathway;ko04924//Renin secretion;ko04540//Gap junction;ko04713//Circadian entrainment;ko04730//Long-term depression	-	-	-	gi|646692555|gb|KDR07449.1|/3.14732e-169/Guanylate cyclase soluble subunit beta-1 [Zootermopsis nevadensis]
Btabaci_GLEAN_10026468	BTA003273.1,novel_T002276,novel_T002277,novel_T002278,novel_T002279	52.66	45.39	67.66	56.44	68.44	110.4	69.29	88.97	-	-	-	-	-	-	gi|339896229|gb|AEK21800.1|/1.80348e-134/cytochrome P450 [Bemisia tabaci]
Btabaci_GLEAN_10024805	BTA024430.1,novel_T014596,novel_T014597	52.47	57.88	56.27	48.24	54.53	57.67	53.86	57.42	-	-	-	-	-	-	gi|646708855|gb|KDR15002.1|/0/Splicing factor 1 [Zootermopsis nevadensis]
Btabaci_GLEAN_10016429	BTA023227.1,novel_T014131,novel_T014132,novel_T014133	52.44	152.42	40.09	70.98	205.52	226.8	82.25	407.84	-	-	ko04142//Lysosome;ko00100//Steroid biosynthesis	-	-	-	gi|939654280|ref|XP_014275807.1|/1.02443e-59/PREDICTED: lipase 1-like [Halyomorpha halys]
Btabaci_GLEAN_10026136	BTA009099.1,novel_T005756,novel_T005757	52.4	37.43	67.57	63.79	34.43	42.97	30.18	33.73	-	-	ko04080//Neuroactive ligand-receptor interaction;ko04730//Long-term depression	-	-	-	gi|641668300|ref|XP_008184410.1|/6.11379e-146/PREDICTED: glutamate receptor ionotropic, delta-1 [Acyrthosiphon pisum]
Btabaci_GLEAN_10014286	BTA026836.1,novel_T016102,novel_T016103,novel_T016104,novel_T016105,novel_T016106	52.39	46.89	46.74	57.41	56.53	96.06	45.35	67.52	-	-	-	-	-	-	gi|913312904|ref|XP_013187203.1|/1.23823e-09/PREDICTED: serine-rich adhesin for platelets-like [Amyelois transitella]
CUFF121.729.2	BTA029689.2,novel_T017917	52.38	42.18	54.92	53.63	47.61	39.41	38.97	48.5	-	-	-	-	-	-	gi|572299653|ref|XP_006615947.1|/0/PREDICTED: zinc finger BED domain-containing protein 1-like [Apis dorsata]
Btabaci_GLEAN_10006196	BTA009635.1,novel_T006152,novel_T006153,novel_T006154	52.38	52.19	46.8	52.36	50.44	70.52	57.09	65.32	-	-	ko01100//Metabolic pathways;ko04640//Hematopoietic cell lineage;ko00480//Glutathione metabolism;ko04614//Renin-angiotensin system	-	-	-	gi|939665937|ref|XP_014280242.1|/0/PREDICTED: aminopeptidase N-like isoform X2 [Halyomorpha halys]
CUFF41.8.2	BTA009471.2,novel_T006025,novel_T006026,novel_T006027,novel_T006028,novel_T006029	52.32	44.23	57.85	54.32	46.06	51.01	50.86	48.2	-	-	-	-	-	-	gi|939644263|ref|XP_014272285.1|/1.85559e-112/PREDICTED: TOX high mobility group box family member 3-like isoform X4 [Halyomorpha halys]
Btabaci_GLEAN_10024139	BTA028878.1	52.29	80.46	35.75	24.15	58.33	30.12	40.12	29.57	-	-	-	-	-	-	gi|939262373|ref|XP_014251112.1|/1.17783e-85/PREDICTED: transmembrane protein 35 isoform X1 [Cimex lectularius]
Btabaci_GLEAN_10018381	BTA018971.1	52.14	53.05	56.77	58.67	46.34	38.72	41.82	46.05	-	-	ko04510//Focal adhesion	-	GO:0003779//actin binding	GO:0007155//cell adhesion;GO:0031532//actin cytoskeleton reorganization	gi|646693575|gb|KDR07747.1|/0/Beta-parvin [Zootermopsis nevadensis]
Btabaci_GLEAN_10024995	BTA022920.1	52.12	59.19	71.37	54.54	58.89	53.61	46.6	54.07	-	-	ko04141//Protein processing in endoplasmic reticulum	GO:0016020//membrane	-	-	gi|665812782|ref|XP_008554920.1|/1.2648e-82/PREDICTED: B-cell receptor-associated protein 31 [Microplitis demolitor]
Btabaci_GLEAN_10025651	BTA016315.1,novel_T010230	52.08	81.45	46.07	54.41	74.32	85.76	107.97	83.47	-	-	ko03013//RNA transport	GO:0005852//eukaryotic translation initiation factor 3 complex;GO:0016282//eukaryotic 43S preinitiation complex;GO:0033290//eukaryotic 48S preinitiation complex	GO:0003743//translation initiation factor activity	GO:0001731//formation of translation preinitiation complex;GO:0006446//regulation of translational initiation	gi|242017404|ref|XP_002429179.1|/1.85035e-144/eukaryotic translation initiation factor 3 subunit, putative [Pediculus humanus corporis]
Btabaci_GLEAN_10012456	BTA029531.1,novel_T017814,novel_T017815	52.08	75	38.56	47.17	68.88	73.4	84.49	75.13	-	-	-	-	-	-	gi|998502233|ref|XP_015511159.1|/0/PREDICTED: T-complex protein 1 subunit eta isoform X1 [Neodiprion lecontei]
Btabaci_GLEAN_10021559	BTA009186.1,novel_T005843	52.07	38.43	66.89	58.43	34.85	39.13	35.24	42.38	-	-	-	-	-	-	gi|646714773|gb|KDR18627.1|/5.65738e-80/hypothetical protein L798_06607 [Zootermopsis nevadensis]
Btabaci_GLEAN_10022565	BTA005348.1,novel_T003566,novel_T003567	52.01	75.11	22.07	10.11	36.51	58.16	39.44	21.41	-	-	-	-	-	-	gi|339896259|gb|AEK21815.1|/0/cytochrome P450 [Bemisia tabaci]
Btabaci_GLEAN_10014071	BTA027118.1,novel_T016320	51.9	60.18	60.99	55.44	57.88	51.37	56.62	62.72	-	-	-	-	-	-	gi|646701596|gb|KDR11250.1|/5.47729e-86/hypothetical protein L798_14515 [Zootermopsis nevadensis]
Btabaci_GLEAN_10011897	BTA000215.1,novel_T000227	51.8	37.63	70.92	64.22	36.41	35.26	34.65	36.21	-	-	-	-	-	-	-
Btabaci_GLEAN_10018863	BTA018185.1,novel_T011166,novel_T011167,novel_T011168	51.74	44.31	55.85	56.42	45.1	42.86	40.24	41.36	-	-	-	-	-	-	gi|939237286|ref|XP_014260259.1|/0/PREDICTED: mucin-5AC isoform X3 [Cimex lectularius]
[truncated: 14,016 more rows]
